# Supplementary material
Source: HighWire-hosted journal article supplement (doi:10.1101/rna.078937.121)
Supplement: Supplementary_Table1.xlsx [file Supplementary_Table1.xlsx]

## Sheet: Tabelle1
sample_id	organism	strain	growth_medium	growth_temperature	growth_phase	replicate_number	rRNA_depletion_in_perc	additional_treatment	library_prep_strategy	ONT_kit_used	additional_barcoding_kit	barcoded	RNA_input_in_ng	reverse_transcription	rt_time_in_min	rt_temp	PCR_cycles	PCR_extension_in_s	PCR_cleanup_bead_equivalent	flowcell_nr	number_of_reads	number_of_bases	median_raw_length	median_raw_qscore	number_of_mapped_reads	number_of_mapped_bases	median_mapped_length	median_mapped_identity	reads_mapped_CDS	bases_mapped_CDS2	perc_of_bases_mapped_CDS	sequencing_depth
RNA001_Ecoli_TEX_replicate1	Escherichia coli	K12 MG1655	rich_medium	37	exponential	1	0	TEX	direct_RNA	SQK-RNA001	no	no	1800	SuperScriptIII	50	50	0	NA	NA	1	1530712	857233884	449	8.71	1153135	695339540	457	86.22	58713	29677673	4.27	6.54
RNA002_Ecoli_NOTEX_replicate2	Escherichia coli	K12 MG1655	rich_medium	37	exponential	2	0	no	direct_RNA	SQK-RNA002	no	no	500	Maxima_RT_H_minus	90	42	0	NA	NA	2	320941	366695437	1072	9.83	206398	286908111	1421	89.51	11003	7624850	2.66	1.68
RNA002_Ecoli_NOTEX_replicate3	Escherichia coli	K12 MG1655	rich_medium	37	exponential	3	0	no	direct_RNA	SQK-RNA002	no	no	500	Maxima_RT_H_minus	90	42	0	NA	NA	3	89671	75191700	720	8.82	25725	31649244	1155	88.24	1498	903626	2.85	0.20
DCS109_Ecoli_NOTEX_replicate2	Escherichia coli	K12 MG1655	rich_medium	37	exponential	2	0.4	no	direct_cDNA	SQK-DCS109	EXP-NBD104	BC01	100	Maxima_RT_H_minus	90	42	0	NA	NA	3	1242641	1219417466	543	10.59	837437	790039855	371	95.6	251575	129085912	16.31	28.24
DCS109_Ecoli_NOTEX_replicate3	Escherichia coli	K12 MG1655	rich_medium	37	exponential	3	0.4	no	direct_cDNA	SQK-DCS109	EXP-NBD104	BC02	100	Maxima_RT_H_minus	90	42	0	NA	NA	3	1705461	1566353950	516	10.50	1070503	1012456336	366	95.5	275780	139331856	13.74	30.43
PCB109_PCR15_Ecoli_NOTEX_replicate4	Escherichia coli	K12 MG1655	rich_medium	37	exponential	4	1	no	PCR_cDNA	SQK-PCB109	no	BC01	~1ng	Maxima_RT_H_minus	90	42	15	500	0.8	4	1740615	686133570	353	9.90	861512	278545587	349	93.54	218381	73144017	26.18	16.02
PCB109_PCR15_Ecoli_TEX_replicate4	Escherichia coli	K12 MG1655	rich_medium	37	exponential	4	1	TEX	PCR_cDNA	SQK-PCB109	no	BC03	~1ng	Maxima_RT_H_minus	90	42	15	500	0.8	4	1346844	551490224	326	9.86	827309	263176057	352	93.72	191821	66876153	25.34	14.66
PCB109_PCR15_Ecoli_NOTEX_replicate5	Escherichia coli	K12 MG1655	rich_medium	37	exponential	5	1	no	PCR_cDNA	SQK-PCB109	no	BC02	~1ng	Maxima_RT_H_minus	90	42	15	500	0.8	4	2213824	748652710	264	9.64	687049	253996422	355	93.85	180734	83287022	32.68	18.26
PCB109_PCR15_Ecoli_TEX_replicate5	Escherichia coli	K12 MG1655	rich_medium	37	exponential	5	1	TEX	PCR_cDNA	SQK-PCB109	no	BC04	~1ng	Maxima_RT_H_minus	90	42	15	500	0.8	4	2032938	720010429	267	9.62	779108	263880411	353	93.92	190605	79796891	30.15	17.51
PCB109_PCR12_Ecoli_NOTEX_replicate4	Escherichia coli	K12 MG1655	rich_medium	37	exponential	4	1	no	PCR_cDNA	SQK-PCB109	no	BC05	~1ng	Maxima_RT_H_minus	90	42	12	500	0.5	5	2084916	1094786811	499	9.71	1275803	624699540	360	93.22	389840	238870607	38.08	52.36
PCB109_PCR12_Ecoli_TEX_replicate4	Escherichia coli	K12 MG1655	rich_medium	37	exponential	4	1	TEX	PCR_cDNA	SQK-PCB109	no	BC06	~1ng	Maxima_RT_H_minus	90	42	12	500	0.5	5	1249145	683468089	492	9.61	788012	433144348	363	93.35	279826	198098113	45.49	43.37
