# Supplementary material
Source: HighWire-hosted journal article supplement (doi:10.1101/rna.078937.121)
Supplement: Supplementary_Table2.xlsx [file Supplementary_Table2.xlsx]

## Sheet: Tabelle1
Figure_type	Figure_nr	Description	Subpanel	link_to_data	link_to_code	comment
Main	1	Overview of generated datasets for benchmarking Nanopore sequencing of RNA and cDNA molecules in prokaryotes	A	NA	NA	graphical visualization
Main	1	Overview of generated datasets for benchmarking Nanopore sequencing of RNA and cDNA molecules in prokaryotes	B	NA	NA	graphical visualization
Main	1	Overview of generated datasets for benchmarking Nanopore sequencing of RNA and cDNA molecules in prokaryotes	C	NA	NA	graphical visualization
Main	1	Overview of generated datasets for benchmarking Nanopore sequencing of RNA and cDNA molecules in prokaryotes	D	https://drive.google.com/drive/folders/1Fgu0jRS_eBN7T3V_q5qACSrswQJr4h2t?usp=sharing	NA	Colorized IGV snapshot of BAM files
Main	2	ONT sequencing of RNA and cDNA molecules is suitable for quantitative measurements	A	https://github.com/felixgrunberger/microbepore/blob/master/tables/salmon_table.tsv	https://github.com/felixgrunberger/microbepore/blob/master/Rscripts/salmon_analysis.R
Main	2	ONT sequencing of RNA and cDNA molecules is suitable for quantitative measurements	B	https://github.com/felixgrunberger/microbepore/blob/master/tables/salmon_table.tsv	https://github.com/felixgrunberger/microbepore/blob/master/Rscripts/salmon_analysis.R
Main	2	ONT sequencing of RNA and cDNA molecules is suitable for quantitative measurements	C	https://github.com/felixgrunberger/microbepore/blob/master/tables/salmon_table.tsv	https://github.com/felixgrunberger/microbepore/blob/master/Rscripts/salmon_analysis.R
Main	3	Analysis of transcript boundaries detected using ONT RNA-seq methods	A		https://github.com/felixgrunberger/microbepore/blob/master/Rscripts/example_coverage_plots.R
Main	3	Analysis of transcript boundaries detected using ONT RNA-seq methods	B	https://github.com/felixgrunberger/microbepore/blob/master/tables/tss_tables	https://github.com/felixgrunberger/microbepore/blob/master/Rscripts/end5_detection.R
Main	3	Analysis of transcript boundaries detected using ONT RNA-seq methods	C	https://github.com/felixgrunberger/microbepore/blob/master/tables/tts_tables	https://github.com/felixgrunberger/microbepore/blob/master/Rscripts/end3_detection.R
Main	4	Gene body coverage of raw and full-length enriched Nanopore reads	A	https://github.com/felixgrunberger/microbepore/blob/master/tables/transcript_tables	https://github.com/felixgrunberger/microbepore/blob/master/Rscripts/gene_body_coverage.R
Main	4	Gene body coverage of raw and full-length enriched Nanopore reads	B	NA	NA	Explanation of metrics
Main	4	Gene body coverage of raw and full-length enriched Nanopore reads	C		https://github.com/felixgrunberger/microbepore/blob/master/Rscripts/gene_body_coverage.R
Main	4	Gene body coverage of raw and full-length enriched Nanopore reads	D		https://github.com/felixgrunberger/microbepore/blob/master/Rscripts/gene_body_coverage.R
Main	4	Gene body coverage of raw and full-length enriched Nanopore reads	E		https://github.com/felixgrunberger/microbepore/blob/master/Rscripts/gene_body_coverage.R
Main	4	Gene body coverage of raw and full-length enriched Nanopore reads	F		https://github.com/felixgrunberger/microbepore/blob/master/Rscripts/gene_body_coverage.R
Main	5	Capability of ONT sequencing to capture complex bacterial operons	A		https://github.com/felixgrunberger/microbepore/blob/master/Rscripts/example_coverage_plots.R
Main	5	Capability of ONT sequencing to capture complex bacterial operons	B	https://github.com/felixgrunberger/microbepore/blob/master/tables/operon_tables	https://github.com/felixgrunberger/microbepore/blob/master/Rscripts/operon_analysis.R
Main	5	Capability of ONT sequencing to capture complex bacterial operons	C	https://github.com/felixgrunberger/microbepore/blob/master/tables/operon_tables	https://github.com/felixgrunberger/microbepore/blob/master/Rscripts/operon_analysis.R
Supplementary	1	Overview of the different library preparation protocols from ONT for the analysis of RNAs	NA	NA	NA	graphical visualization
Supplementary	2	Bioanalyzer analysis of RNA quality, polyA-tailing efficiency and PCR amplification effect on fragment size	A	https://drive.google.com/drive/folders/1g0e5idcntIRGfA_kiuLGxjIHCozAHup_?usp=sharing	https://github.com/felixgrunberger/microbepore/blob/master/Rscripts/bioanalyzer_analysis.R
Supplementary	2	Bioanalyzer analysis of RNA quality, polyA-tailing efficiency and PCR amplification effect on fragment size	B	https://drive.google.com/drive/folders/1g0e5idcntIRGfA_kiuLGxjIHCozAHup_?usp=sharing	https://github.com/felixgrunberger/microbepore/blob/master/Rscripts/bioanalyzer_analysis.R
Supplementary	3	Total sequencing throughput	A	https://drive.google.com/drive/folders/1A6X1Nr6nCX6wGiP0ug4r_hxj44VJYdIV?usp=sharing	https://github.com/felixgrunberger/microbepore/blob/master/Rscripts/raw_read_analysis.R
Supplementary	3	Total sequencing throughput	B	https://drive.google.com/drive/folders/1A6X1Nr6nCX6wGiP0ug4r_hxj44VJYdIV?usp=sharing	https://github.com/felixgrunberger/microbepore/blob/master/Rscripts/raw_read_analysis.R
Supplementary	4	Raw read characteristics	A	https://drive.google.com/drive/folders/1A6X1Nr6nCX6wGiP0ug4r_hxj44VJYdIV?usp=sharing	https://github.com/felixgrunberger/microbepore/blob/master/Rscripts/raw_read_analysis.R
Supplementary	4	Raw read characteristics	B	https://drive.google.com/drive/folders/1A6X1Nr6nCX6wGiP0ug4r_hxj44VJYdIV?usp=sharing	https://github.com/felixgrunberger/microbepore/blob/master/Rscripts/raw_read_analysis.R
Supplementary	4	Raw read characteristics	C	https://drive.google.com/drive/folders/1A6X1Nr6nCX6wGiP0ug4r_hxj44VJYdIV?usp=sharing	https://github.com/felixgrunberger/microbepore/blob/master/Rscripts/raw_read_analysis.R
Supplementary	5	Mapping statistics	A	https://drive.google.com/drive/folders/1A6X1Nr6nCX6wGiP0ug4r_hxj44VJYdIV?usp=sharing	https://github.com/felixgrunberger/microbepore/blob/master/Rscripts/mapped_read_analysis.R
Supplementary	5	Mapping statistics	B	https://drive.google.com/drive/folders/1A6X1Nr6nCX6wGiP0ug4r_hxj44VJYdIV?usp=sharing	https://github.com/felixgrunberger/microbepore/blob/master/Rscripts/mapped_read_analysis.R
Supplementary	6	Quality control of mapped reads	A	https://drive.google.com/drive/folders/1A6X1Nr6nCX6wGiP0ug4r_hxj44VJYdIV?usp=sharing	https://github.com/felixgrunberger/microbepore/blob/master/Rscripts/mapped_read_analysis.R
Supplementary	6	Quality control of mapped reads	B	https://drive.google.com/drive/folders/1A6X1Nr6nCX6wGiP0ug4r_hxj44VJYdIV?usp=sharing	https://github.com/felixgrunberger/microbepore/blob/master/Rscripts/mapped_read_analysis.R
Supplementary	6	Quality control of mapped reads	C	https://drive.google.com/drive/folders/1A6X1Nr6nCX6wGiP0ug4r_hxj44VJYdIV?usp=sharing	https://github.com/felixgrunberger/microbepore/blob/master/Rscripts/mapped_read_analysis.R
Supplementary	6	Quality control of mapped reads	D	https://drive.google.com/drive/folders/1A6X1Nr6nCX6wGiP0ug4r_hxj44VJYdIV?usp=sharing	https://github.com/felixgrunberger/microbepore/blob/master/Rscripts/mapped_read_analysis.R
Supplementary	7	Quantification of mapped reads	A	https://drive.google.com/drive/folders/1A6X1Nr6nCX6wGiP0ug4r_hxj44VJYdIV?usp=sharing	https://github.com/felixgrunberger/microbepore/blob/master/Rscripts/mapped_read_analysis2.R
Supplementary	7	Quantification of mapped reads	B	https://drive.google.com/drive/folders/1A6X1Nr6nCX6wGiP0ug4r_hxj44VJYdIV?usp=sharing	https://github.com/felixgrunberger/microbepore/blob/master/Rscripts/mapped_read_analysis2.R
Supplementary	8	Aligned read quality control	A	https://drive.google.com/drive/folders/1A6X1Nr6nCX6wGiP0ug4r_hxj44VJYdIV?usp=sharing	https://github.com/felixgrunberger/microbepore/blob/master/Rscripts/mapped_read_analysis2.R
Supplementary	8	Aligned read quality control	B	https://drive.google.com/drive/folders/1A6X1Nr6nCX6wGiP0ug4r_hxj44VJYdIV?usp=sharing	https://github.com/felixgrunberger/microbepore/blob/master/Rscripts/mapped_read_analysis2.R
Supplementary	9	RT artefacts lead to 2D-like reads in the (PCR-)cDNA datasets.	A	https://drive.google.com/drive/folders/1A6X1Nr6nCX6wGiP0ug4r_hxj44VJYdIV?usp=sharing	https://github.com/felixgrunberger/microbepore/blob/master/Rscripts/mapped_read_analysis2.R
Supplementary	9	RT artefacts lead to 2D-like reads in the (PCR-)cDNA datasets.	B	https://drive.google.com/drive/folders/1A6X1Nr6nCX6wGiP0ug4r_hxj44VJYdIV?usp=sharing	https://github.com/felixgrunberger/microbepore/blob/master/Rscripts/mapped_read_analysis2.R
Supplementary	9	RT artefacts lead to 2D-like reads in the (PCR-)cDNA datasets.	C	https://drive.google.com/drive/folders/1A6X1Nr6nCX6wGiP0ug4r_hxj44VJYdIV?usp=sharing	https://github.com/felixgrunberger/microbepore/blob/master/Rscripts/mapped_read_analysis2.R
Supplementary	9	RT artefacts lead to 2D-like reads in the (PCR-)cDNA datasets.	D	https://drive.google.com/drive/folders/1A6X1Nr6nCX6wGiP0ug4r_hxj44VJYdIV?usp=sharing	https://github.com/felixgrunberger/microbepore/blob/master/Rscripts/mapped_read_analysis2.R
Supplementary	9	RT artefacts lead to 2D-like reads in the (PCR-)cDNA datasets.	E	https://drive.google.com/drive/folders/1A6X1Nr6nCX6wGiP0ug4r_hxj44VJYdIV?usp=sharing	https://github.com/felixgrunberger/microbepore/blob/master/Rscripts/mapped_read_analysis2.R
Supplementary	10	Correlation between sequencing depth, sample treatment and the number of seen genes	A	https://drive.google.com/drive/folders/1A6X1Nr6nCX6wGiP0ug4r_hxj44VJYdIV?usp=sharing	https://github.com/felixgrunberger/microbepore/blob/master/Rscripts/seq_depth.R
Supplementary	10	Correlation between sequencing depth, sample treatment and the number of seen genes	B	https://drive.google.com/drive/folders/1A6X1Nr6nCX6wGiP0ug4r_hxj44VJYdIV?usp=sharing	https://github.com/felixgrunberger/microbepore/blob/master/Rscripts/seq_depth.R
Supplementary	10	Correlation between sequencing depth, sample treatment and the number of seen genes	C	https://drive.google.com/drive/folders/1A6X1Nr6nCX6wGiP0ug4r_hxj44VJYdIV?usp=sharing	https://github.com/felixgrunberger/microbepore/blob/master/Rscripts/seq_depth.R
Supplementary	11	Influence of PCR on quantification	A	https://github.com/felixgrunberger/microbepore/blob/master/tables/salmon_table.tsv	https://github.com/felixgrunberger/microbepore/blob/master/Rscripts/salmon_analysis.R
Supplementary	11	Influence of PCR on quantification	B	https://github.com/felixgrunberger/microbepore/blob/master/tables/salmon_table.tsv	https://github.com/felixgrunberger/microbepore/blob/master/Rscripts/salmon_analysis.R
Supplementary	12	Identification of full-length cDNA reads using Pychopper	A	NA	NA	graphical visualization
Supplementary	12	Identification of full-length cDNA reads using Pychopper	B	NA	https://github.com/felixgrunberger/microbepore/blob/master/Rscripts/pychopper_trimming.R
Supplementary	12	Identification of full-length cDNA reads using Pychopper	C	NA	https://github.com/felixgrunberger/microbepore/blob/master/Rscripts/pychopper_trimming.R
Supplementary	13	Base identities of terminal read positions and effects of trimming	A	NA	https://github.com/felixgrunberger/microbepore/blob/master/Rscripts/read_end_identities.R
Supplementary	13	Base identities of terminal read positions and effects of trimming	B	NA	https://github.com/felixgrunberger/microbepore/blob/master/Rscripts/read_end_identities.R
Supplementary	14	5´ end detection using ONT data	A	https://github.com/felixgrunberger/microbepore/blob/master/tables/tss_tables	https://github.com/felixgrunberger/microbepore/blob/master/Rscripts/end5_detection.R
Supplementary	14	5´ end detection using ONT data	B	https://github.com/felixgrunberger/microbepore/blob/master/tables/tss_tables	https://github.com/felixgrunberger/microbepore/blob/master/Rscripts/end5_detection.R
Supplementary	15	Reproducibility and comparability of 5´end detection	A	https://github.com/felixgrunberger/microbepore/blob/master/tables/tss_tables	https://github.com/felixgrunberger/microbepore/blob/master/Rscripts/end5_detection.R
Supplementary	15	Reproducibility and comparability of 5´end detection	B	https://github.com/felixgrunberger/microbepore/blob/master/tables/tss_tables	https://github.com/felixgrunberger/microbepore/blob/master/Rscripts/end5_detection.R
Supplementary	15	Reproducibility and comparability of 5´end detection	C	https://github.com/felixgrunberger/microbepore/blob/master/tables/tss_tables	https://github.com/felixgrunberger/microbepore/blob/master/Rscripts/end5_detection.R
Supplementary	16	Comparison of 5´ends detected by ONT and SMRT-Cap	A	https://github.com/felixgrunberger/microbepore/blob/master/tables/tss_tables	https://github.com/felixgrunberger/microbepore/blob/master/Rscripts/end5_detection.R
Supplementary	16	Comparison of 5´ends detected by ONT and SMRT-Cap	B	https://github.com/felixgrunberger/microbepore/blob/master/tables/tss_tables	https://github.com/felixgrunberger/microbepore/blob/master/Rscripts/end5_detection.R
Supplementary	17	Features of primary 5´ends in E. coli	A	https://github.com/felixgrunberger/microbepore/blob/master/tables/tss_tables	https://github.com/felixgrunberger/microbepore/blob/master/Rscripts/end5_detection.R
Supplementary	17	Features of primary 5´ends in E. coli	B	https://github.com/felixgrunberger/microbepore/blob/master/tables/tss_tables	https://github.com/felixgrunberger/microbepore/blob/master/Rscripts/end5_detection.R
Supplementary	18	3´ end detection using ONT data	A	https://github.com/felixgrunberger/microbepore/blob/master/tables/tts_tables	https://github.com/felixgrunberger/microbepore/blob/master/Rscripts/end3_detection.R
Supplementary	18	3´ end detection using ONT data	B	https://github.com/felixgrunberger/microbepore/blob/master/tables/tts_tables	https://github.com/felixgrunberger/microbepore/blob/master/Rscripts/end3_detection.R
Supplementary	19	Correlation matrix of primary 3´ends		https://github.com/felixgrunberger/microbepore/blob/master/tables/tts_tables	https://github.com/felixgrunberger/microbepore/blob/master/Rscripts/end3_detection.R
Supplementary	20	Features of primary 3´ends in E. coli	A	https://github.com/felixgrunberger/microbepore/blob/master/tables/tts_tables	https://github.com/felixgrunberger/microbepore/blob/master/Rscripts/end3_detection.R
Supplementary	20	Features of primary 3´ends in E. coli	B	https://github.com/felixgrunberger/microbepore/blob/master/tables/tts_tables	https://github.com/felixgrunberger/microbepore/blob/master/Rscripts/end3_detection.R
Supplementary	21	Comparability of operon detection to SMRT-Cap and the Regulon database	A	https://github.com/felixgrunberger/microbepore/blob/master/tables/operon_tables	https://github.com/felixgrunberger/microbepore/blob/master/Rscripts/operon_analysis.R
Supplementary	21	Comparability of operon detection to SMRT-Cap and the Regulon database	B	https://github.com/felixgrunberger/microbepore/blob/master/tables/operon_tables	https://github.com/felixgrunberger/microbepore/blob/master/Rscripts/operon_analysis.R
Supplementary	22	Operon analysis of the rpsB-containing operon	A		NA	gene annotation
Supplementary	22	Operon analysis of the rpsB-containing operon	B		compare https://github.com/felixgrunberger/microbepore/blob/master/Rscripts/example_coverage_plots.R
Supplementary	22	Operon analysis of the rpsB-containing operon	C		compare https://github.com/felixgrunberger/microbepore/blob/master/Rscripts/example_coverage_plots.R
Supplementary	22	Operon analysis of the rpsB-containing operon	D		compare https://github.com/felixgrunberger/microbepore/blob/master/Rscripts/example_coverage_plots.R
Supplementary	23	Operon analysis of a genomic region containing many ribosomal proteins	A		NA	gene annotation
Supplementary	23	Operon analysis of a genomic region containing many ribosomal proteins	B		compare https://github.com/felixgrunberger/microbepore/blob/master/Rscripts/example_coverage_plots.R
Supplementary	23	Operon analysis of a genomic region containing many ribosomal proteins	C		compare https://github.com/felixgrunberger/microbepore/blob/master/Rscripts/example_coverage_plots.R
Supplementary	23	Operon analysis of a genomic region containing many ribosomal proteins	D		compare https://github.com/felixgrunberger/microbepore/blob/master/Rscripts/example_coverage_plots.R
