# Supplementary material
Source: HighWire-hosted journal article supplement (doi:10.1101/rna.078937.121)
Supplement: Supplementary_Table3.xlsx [file Supplementary_Table3.xlsx]

## Sheet: Sheet1
gene	RNA001_Ecoli_TEX_replicate1	PCB109_PCR15_Ecoli_NOTEX_replicate4	PCB109_PCR15_Ecoli_NOTEX_replicate5	PCB109_PCR15_Ecoli_TEX_replicate4	PCB109_PCR15_Ecoli_TEX_replicate5	PCB109_PCR12_Ecoli_NOTEX_replicate4	PCB109_PCR12_Ecoli_TEX_replicate4	DCS109_Ecoli_NOTEX_replicate2	DCS109_Ecoli_NOTEX_replicate3	RNA002_Ecoli_NOTEX_replicate2	RNA002_Ecoli_NOTEX_replicate3	SRR1927169	SRR7533626	SRR7533627
b0001	0	0	0	0	0	0	0	0	0	0	0	137.319	186.039	0
b0002	0.742128	1.34644	0.529192	0.667254	0.484777	1.7593	1.21105	1.3262	1.48005	3.28992	4.76417	6.60269	1.83401	9.79259
b0003	1.80344	7.29749	7.87178	3.6852	4.97399	6.90951	7.41983	5.72937	3.30727	0	0	9.46293	5.36734	32.3513
b0004	1.58373	1.77626	1.95064	0.809061	1.35064	2.27541	3.85316	4.33957	3.97534	9.36108	10.1669	9.76636	1.51504	10.6538
b0005	16.8655	24.4793	17.4929	7.58196	13.4652	13.7311	20.0162	45.5433	40.5945	0	0	43.8246	67.2251	17.4545
b0006	0.779094	1.13081	2.22221	1.01889	1.41368	1.94021	3.14376	9.03418	8.25107	4.60505	0	20.6553	8.94363	0
b0007	0	2.29365	2.65934	2.18807	1.84202	2.33096	2.43435	6.57164	6.5509	2.05492	0	7.67217	0.332578	0
b0008	36.7425	9.31149	2.26841	5.33907	2.03184	11.2841	2.90709	24.8278	32.4872	89.6284	44.928	586.178	7.25294	13.8824
b0009	3.64422	3.52624	3.4648	1.58863	1.93967	6.74836	4.90167	21.8041	20.7174	0	0	11.9397	5.42292	0
b0010	36.266	12.8177	35.2641	5.50508	10.5288	32.3793	71.4785	16.8706	11.7575	7.65571	0	15.3646	4.54313	1.34045
b0011	1.76975	0.583792	0.688344	0.361636	0.385349	0.508534	0.52509	0.702795	1.9473	5.2303	22.7222	1.43292	0.282166	0
b0012	0	0.459118	0.676677	0.284405	0.126273	0	0.206476	0	0.717859	0	0		0	0
b0013	2.64892	0	0.686864	0.43303	0.38452	0.25372	0.943129	2.94539	4.37199	0	0	1.39658	1.68935	0
b0014	86.2051	9.58722	5.23697	4.36862	2.59211	21.0434	13.3879	30.986	28.6254	48.0422	44.2722	70.5676	88.9849	19.8824
b0015	59.1873	16.1113	13.8367	8.72327	8.28726	25.1762	28.7613	15.1019	13.9737	22.0373	0	6.87987	62.8618	30.8683
b0016	47.5762	7.59593	8.32713	3.46098	5.42138	16.1317	16.8827	19.0443	20.6779	36.5576	12.2168	14.0109	119.698	20.6799
b0018	322.626	207.53	261.428	105.482	207.821	251.079	354.179	224.209	171.95	476.743	0	80.4925	12.8597	125.21
b0019	4.9252	4.84452	3.2508	1.86647	1.72237	2.83049	3.24147	4.26735	4.98822	2.64652	11.4974	9.35823	9.28039	0
b0020	3.75533	1.65171	1.37949	0.6139	0.454273	1.67858	2.82268	4.67273	3.61556	0	0	12.1859	10.1786	0.647747
b0021	43.6446	33.9133	28.9213	13.741	15.2521	38.8621	39.7117	62.3949	49.1347	143.319	88.4957	36.5248	8.76269	5.01876
b0022	75.4539	21.5715	22.826	13.3627	15.5167	46.9766	28.3573	163.802	157.399	668.987	603.22	48.3059	0	0
b0023	686.299	903.459	124.156	425.287	30.1189	1495.1	130.7	2482.01	1857.14	6698.04	5327.91	3685.07	183.218	16.5179
b0024	0	4.66793	4.58659	0	0	10.1654	0	84.2918	25.5013	0	0	23.9806	45.1232	73.2245
b0025	9.49324	19.3374	15.0003	10.2813	6.93331	36.2578	20.7025	29.311	25.5231	21.0421	15.2357	31.4159	93.2745	72.4578
b0026	12.9557	13.296	8.91692	9.596	5.71163	14.4621	12.2438	13.2624	14.0574	15.1265	0	35.719	27.8477	55.4534
b0027	68.7097	24.9873	26.2901	17.9442	17.3937	66.9355	58.8718	39.9302	48.8652	89.15	86.0662	14.8942	70.0047	457.875
b0028	34.8995	21.9413	18.8973	8.89336	8.49309	29.2983	27.7751	24.7833	24.0004	24.2686	0	42.9848	15.0564	138.1
b0029	16.3999	3.40049	3.03749	1.24473	1.5304	6.33939	6.11711	7.72212	5.39743	3.462	0	34.1888	2.80153	23.6404
b0030	4.32192	0.488806	0.560336	0.403727	0.3585	1.65586	0.952584	3.92297	4.16107	3.64942	0	52.3388	8.46582	1.27796
b0031	4.30681	5.49336	6.70052	3.34425	2.60492	28.8074	13.7155	16.989	12.0446	0	0	12.8131	3.20445	0
b0032	3.19697	0.180787	0.23685	0.0746604	0.0331483	0.218724	0.325217	1.23329	1.88448	0	0	2.3391	17.913	5.67193
b0033	1.79595	0.346347	0.179111	0.135504	0.180486	0.291112	0.213457	0.790005	0.646041	0.816575	0	2.45563	5.55065	3.00248
b0034	8.43663	2.96854	4.73983	0.919448	2.85757	7.27273	10.0063	8.93416	4.6415	0	0	19.9102	0	0
b0035	0	2.38311	2.966	1.67307	1.57304	2.99851	3.14376	4.39896	2.48409	0	0	0.408092	0	0
b0036	0	0.404298	0.0993133	0.125223	0.22239	0	0.0909111	0.851745	0.316072	4.52773	0	0.259626	0	0
b0037	2.20405	0.498552	0.449042	0.566194	0.251383	0.542852	0.560525	1.20036	0.692903	0	0	1.8972	5.02012	0.977581
b0038	1.27247	0.167901	0.164975	0.0346693	0.0615709	0.284387	0.855766	0.943255	0.466707	0	0	2.77936	8.92669	1.75587
b0039	6.4369	0.364004	0.357661	0.112743	0.133484	0.0880776	0.709371	2.70226	2.02362	2.71765	0	4.34603	9.5298	1.90334
b0040	0	0.12848	0	0.132648	0.164903	0.0310882	0.308163	0.567125	0.84819	0	0	0.244461	0.103498	0
b0041	0	0.269528	0.102173	0.128829	0.171595	0.301932	0.280585	1.12663	0.977251	0	0	0.712268	1.25648	0
b0042	0	0.18852	0.0769248	0.0969938	0.129192	0.0568304	0.21125	1.03672	0.488332	0	0	0.223442	1.13519	1.2281
b0043	0	0.052243	0.0513326	0.0323624	0.114948	0.122758	0.0490573	0.659489	0.544567	0	0	0.31312	0.757521	0.819521
b0044	0	0	0	0.635431	0	0.727459	1.12937	0	6.84537	0	0	0.374858	12.6964	20.6033
b0045	0.379466	0.500702	0.63957	0.0998421	0.523296	0.29077	0.540425	0.694025	1.40918	0	0	0.0714518	0	0.785438
b0046	0	0.578391	0.378875	0.35829	0.424204	1.25957	1.21387	1.39258	3.81836	0	0	2.09097	20.0348	0
b0047	0.763638	0.738916	0.594033	0.561758	0.240176	0.755812	0.664614	1.13214	1.26037	0	0	1.28452	3.49025	0.526871
b0048	8.92571	30.8567	10.4149	7.44153	5.70093	20.3473	14.8304	22.9685	18.6602	31.6547	0	33.6134	11.954	1.84749
b0049	11.0781	5.48155	10.7721	2.77307	5.7289	9.01926	18.571	10.8882	10.0944	12.2775	0	14.4192	4.63646	5.7325
b0050	96.2303	34.2832	62.797	13.6337	20.2549	127.504	215.471	91.7147	92.6487	113.759	82.3681	153.293	31.7084	149.387
b0051	28.7121	9.75546	22.3351	4.16565	7.71057	33.9639	62.529	27.4788	26.9524	21.2138	0	85.5825	12.5889	63.144
b0052	15.5356	10.8352	17.696	4.67117	8.61793	27.9006	44.5798	18.5082	19.0782	29.5159	14.2475	38.8852	21.5849	71.7773
b0053	12.2739	4.80635	1.89931	3.10679	1.49433	9.29125	3.57122	14.025	14.9211	18.7222	10.1669	85.8694	29.2908	59.0055
b0054	7.41194	1.67289	0.834515	0.797146	0.792788	2.35399	0.949103	4.77139	5.63375	4.61161	0	79.3235	19.6543	16.7546
b0055	2.17623	1.72291	1.12859	1.30445	1.15832	2.98771	2.3245	7.48985	7.08389	8.57548	0	7.23935	6.93948	0.750745
b0056	4.09559	1.62123	1.06198	1.50659	1.04041	2.84407	3.28096	6.34303	3.94315	0	0		3.91795	0
b0057	291.659	28.863	18.9067	11.9078	26.461	69.8395	69.2287	92.6576	110.316	0	0		116.254	0
b0058	10.0142	5.02118	5.45303	3.19228	2.32588	12.7572	15.4504	9.54429	11.0188	11.8383	0	14.5948	67.0591	39.383
b0059	2.31793	1.36612	1.30225	0.770474	0.50471	2.73821	3.26445	2.94555	2.33793	1.82677	0	9.32851	16.0145	7.51649
b0060	0.976647	0.747432	0.481164	0.574764	0.538731	0.823202	0.85773	2.23396	1.69254	1.15455	5.01575	3.7883	0.809716	0.202151
b0061	0	0	0.238708	0.150493	0.133634	0	0.546282	1.02362	1.26618	0	0	2.28812	0.293553	0
b0062	1.31072	0.389133	0.339869	0.187485	0.356748	0.408018	0.738897	0.780758	0.811244	0	0	1.36975	0.940402	0
b0063	0	0.112011	0.146745	0.0462575	0.123227	0.108412	0.167913	0.584322	0.467029	0	0	0.543467	0.812077	0
b0064	1.30551	0.344521	0.253888	0.106709	0.284264	0.312612	1.47192	2.79956	1.3467	0	0	6.76009	0.416295	0
b0065	4.78349	15.569	15.7112	9.25339	7.29095	9.5453	9.55643	7.97829	8.33367	4.71235	0	4.26335	0.271764	0.825091
b0066	4.57219	1.44791	3.20103	1.1959	1.19467	5.51799	4.23253	4.64815	5.91128	5.40504	23.4813	1.99734	2.31262	0
b0067	0.905031	1.55243	2.30763	1.08496	0.985316	3.52524	5.87175	1.72513	2.03314	3.56629	0	0.761179	2.98212	0
b0068	5.03439	6.86425	11.8938	1.73743	4.50659	8.94761	21.4431	3.46533	3.61603	3.30635	0	3.3705	7.31324	0.578912
b0069	0	0.655043	0.643629	0.310297	0.211951	0.671294	0.242602	1.25243	0.6828	1.72607	0	2.0015	3.72475	0
b0070	1.32589	5.59838	9.68374	3.57635	3.20778	2.83626	6.34675	4.42284	3.4041	2.61234	0	2.82946	0.986517	0.457397
b0071	0	5.02193	9.86884	2.82808	4.7714	3.64545	6.43323	5.67921	4.91747	0	0	2.99688	1.1033	0
b0072	0	0.0941372	0.0924968	0.320728	0.129454	0.307506	0.296349	0.623295	0.539694	0	0	0.994092	0.341246	0
b0073	0	1.15816	0.948312	0.757289	0.4601	0.98083	0.520849	0.619661	0.40241	0	0	1.15691	0.310985	0
b0074	0.93173	0.163921	0.0805324	0.101543	0.293044	0.208235	0.368595	0.493338	0.427168	0	0	1.06434	0.198071	0
b0075	0	0	0	0	18.5961	24.5408	0	61.0477	105.719	0	0	0	0	0
b0076	0.590766	0	0	0	0.0857563	0.22634	0	1.12609	0.650033	3.49189	0	1.00115	0.188381	0
b0077	0	0.496399	0.64961	0.250277	0.303054	0.346608	0.363398	1.3265	0.995432	0	0	1.47808	0.798863	0
b0078	0	0.556311	0.6599	0.138677	0.123142	0.650027	1.61085	1.61701	2.33354	10.0284	0	5.11146	4.32809	0
b0080	8.15727	8.53899	4.7944	4.40056	2.92083	11.7719	7.22857	10.7115	14.9594	9.64316	13.9644	41.287	12.4855	0.56281
b0081	92.3319	51.3246	75.6454	26.334	33.7927	77.3361	142.221	103.29	107.809	46.4471	0	128.95	10.6494	2.79147
b0082	14.8332	43.5286	33.8469	15.713	17.3548	34.3256	44.785	33.9291	35.8252	14.0281	0	33.0694	3.40556	3.45525
b0083	60.1716	39.6979	38.5473	36.4529	23.1209	93.5703	93.2559	93.3311	92.9834	39.2273	90.8889	51.8516	11.2866	21.9787
b0084	4.87178	36.3197	6.98296	22.4765	4.02707	23.4352	6.64915	17.8418	21.0698	4.9993	0	34.6446	0.690441	3.64139
b0085	5.63805	7.65815	1.89193	3.38851	0.818426	10.4193	3.46373	12.4328	11.6775	11.7618	0	16.7611	1.37482	14.4158
b0086	8.51524	34.0493	14.784	23.6644	10.1842	26.7379	15.5544	11.4678	15.2764	15.3183	0	43.0403	2.00696	18.7747
b0087	8.37923	10.2759	6.13477	7.05039	3.86367	15.2963	10.8805	11.3527	13.2874	29.134	0	13.4946	2.98628	30.0965
b0088	4.61761	4.51889	2.7938	2.48475	1.5361	7.37144	3.88183	10.0243	12.12	15.9213	9.88108	13.4334	2.20867	15.9296
b0089	4.12646	4.84589	3.58446	2.63082	2.0366	10.2368	7.00317	14.3548	12.997	13.9051	0	18.5391	2.36849	12.8117
b0090	8.03095	8.21249	4.16485	3.48727	2.69587	10.8653	8.87594	15.5474	13.8763	6.82073	0	26.0664	2.88099	11.4282
b0091	5.35834	2.38622	2.95251	1.47817	1.33688	7.60229	5.6439	11.3841	11.976	1.9795	0	12.9776	1.92222	10.7444
b0092	14.0736	5.65174	5.23593	2.55075	2.6203	10.9599	11.1835	22.7442	20.3668	7.23357	0	29.15	9.95107	22.1643
b0093	10.6002	10.63	6.96321	4.85203	3.69298	14.4852	12.7482	24.1345	19.731	12.5311	0	41.7824	12.3939	29.9859
b0094	10.1328	9.30564	8.9333	4.70434	4.14792	15.1406	13.7094	23.3064	21.5183	19.1657	20.8156	26.3452	7.88392	25.1681
b0095	8.64863	9.06937	8.26216	3.64619	3.86545	17.6577	16.0447	28.5606	27.1089	18.8337	13.2315	74.7909	6.96718	24.4966
b0096	162.881	50.3642	41.9958	27.8828	22.5733	104.263	80.606	137.761	132.556	119.89	61.049	242.464	18.0316	29.2611
b0097	35.9065	14.2135	11.1322	7.40103	4.64568	32.2987	21.8629	57.5319	71.0726	36.9104	40.0879	216.999	14.9344	33.9291
b0098	7.69006	3.88232	2.1024	2.33662	1.34684	6.61315	4.72204	15.4816	12.5314	9.88136	0	78.5511	1.49263	3.63329
b0099	5.86546	6.19154	11.0266	3.11627	3.61861	9.26985	4.87283	15.3731	14.5213	0	0	16.3457	8.4166	6.07031
b0101	378.854	162.465	313.129	92.8992	134.05	517.098	663.2	759.764	599.237	559.83	0	378.083	211.413	97.6781
b0102	12.4671	3.94804	8.29728	2.30979	3.86077	13.3742	17.2621	15.5787	13.8321	0	21.3423	16.0569	6.62575	0.866187
b0103	6.64015	3.06656	4.8784	1.89961	2.81135	6.89011	12.2149	14.5908	13.8515	13.0828	28.4181	15.5038	8.82243	1.14534
b0104	17.0645	7.23256	15.4198	3.71948	6.41795	24.4677	35.5336	13.8817	15.7893	21.3955	0	12.95	2.76575	1.6055
b0106	0.861663	1.13696	1.06129	0.598654	0.34397	2.14584	2.55658	3.07961	2.42952	2.54655	0	1.07083	0.855476	0.445878
b0107	2.53	0.619971	0.562309	0.324963	0.341025	0.588515	0.729209	1.55011	1.73988	0	9.28091	2.01444	0.806755	0
b0108	0	0.283644	0	0	0.156023	0.205899	0.765366	2.04878	1.77398	0	0	1.13335	2.74188	0
b0109	4.46285	2.1031	0.743924	1.45912	0.694107	3.90824	1.58897	9.51959	6.75204	7.53684	0	24.3457	2.43959	0.659816
b0110	5.02352	4.30537	4.93541	4.11164	2.66427	11.4594	4.19515	11.2298	17.5773	0	0	24.6268	0	0
b0111	2.24293	1.25366	1.14383	1.10942	1.23142	4.7452	2.89954	3.98862	7.09395	8.02268	0	7.43717	0.216405	0
b0112	2.55701	3.08475	5.16217	1.88102	3.28758	3.91867	5.63584	4.00368	3.91885	2.15913	0	1.44442	0.232962	0
b0113	30.2954	2.41951	0.723541	0.847142	0.405053	3.0545	1.89236	3.92582	6.46956	14.1371	0	35.8182	24.4054	1.65018
b0114	12.076	14.9018	6.30668	4.4904	2.70351	30.057	14.9576	20.6951	21.9898	20.1066	8.73497	50.71	10.0336	159.478
b0115	19.492	10.2878	7.51662	6.00523	3.62755	28.2204	25.2984	40.2113	39.0111	26.5876	32.0849	37.0885	13.9451	272.85
b0116	30.4006	11.8957	15.4486	4.94115	7.45642	28.5829	27.827	44.6822	38.4968	61.9624	17.9457	87.325	11.0311	100.896
b0117	0.511948	0.30398	0.398244	0.104613	0.315839	0.367768	0.637964	1.05717	0.880168	0	0	0.318112	0	0.529828
b0118	17.8362	0.692197	0.566779	0.414496	0.812275	0.787203	0.539581	1.91658	1.56331	7.23511	0	38.4842	16.3377	5.42915
b0119	29.0678	72.8738	57.0006	38.0147	26.1082	112.76	75.4642	48.4816	45.4771	21.4766	0	26.6825	27.807	15.0415
b0120	24.861	3.18097	3.61391	1.6626	1.8591	10.896	8.67275	15.1979	14.5065	31.1707	0	53.6211	7.4471	4.67804
b0121	17.3017	0.96586	3.27847	0.598312	0.869377	4.90786	5.13345	13.6358	14.0035	7.86665	0	51.0477	5.94148	3.44345
b0122	41.8945	4.97514	3.80213	2.0546	0.304073	6.42041	2.98324	67.2131	75.4845	24.7629	0	289.825	5.34365	0
b0123	1.89354	0.791194	1.06382	0.33534	0.503926	0.816156	1.46073	0.701822	1.389	0	0	2.16304	2.51585	0.653223
b0124	1.15063	0.961553	0.969661	0.626994	0.695944	1.13884	1.02418	1.27941	1.58258	1.13352	0	0.924408	0.48921	0
b0125	84.4055	13.9687	17.2494	10.0563	9.96805	57.6882	38.3714	79.763	85.5928	67.6477	0	64.704	44.2499	4.44169
b0126	17.8946	7.47707	6.44454	4.22545	4.54581	24.6625	18.4059	40.1107	35.0042	41.1332	51.0562	66.5659	40.5772	3.0866
b0127	4.70563	0.960283	1.41532	0.545286	1.18849	1.45224	1.72744	3.94977	3.50341	0	0	11.9906	16.6315	0
b0128	1.76606	1.66375	1.94128	2.2545	3.71789	1.35869	1.77704	3.25471	5.20276	9.31617	0	5.54976	18.8471	0.815589
b0129	19.3468	15.0331	18.3943	11.0695	17.0065	12.7657	15.5624	28.3414	22.1747	38.1182	0	9.06682	19.1932	0
b0130	3.37599	3.15105	2.49864	1.78073	1.7941	6.50093	2.43642	6.38883	8.81648	9.90556	21.5166	10.0977	0.667984	0
b0131	53.0999	200.575	21.5366	116.307	14.104	314.013	24.5501	265.856	256.924	203.782	160.964	139.986	36.9788	3.24368
b0132	1.25753	1.32744	1.54886	0.92508	1.41472	1.80674	1.3432	6.39209	3.54569	0	0	1.23129	1.60398	0
b0133	13.6406	6.20954	5.12866	5.12875	4.99972	10.2563	8.49913	13.9756	12.2887	16.1253	0	45.7187	16.3112	2.11755
b0134	4.52017	3.678	1.36743	2.09364	1.64038	5.55624	4.29167	9.45381	6.11344	0	19.3452	34.6977	14.4137	0
b0135	0	0.219114	0.376768	0.101799	0	0.357876	0.344892	1.58267	1.08489	0	0	0.984951	0	0
b0136	0	0.156127	0	0	0	0.226666	0	1.50362	0.650969	0	0	0.445595	0.377305	0
b0137	0	0.15218	0.149528	0.0942692	0.167418	0.441872	0.136877	1.4656	1.26902	0	0	0.738362	0.367766	0
b0138	0	0.3386	0	0	0	0.737374	0	2.85335	1.41179	0	0	0.966385	1.22742	0
b0139	0.34973	0.0461465	0.136027	0.0714647	0.0634589	0.100494	0.103766	0.694414	0.240509	0	0	0.26341	0.16728	0
b0140	0	0.331014	0.216831	0.06835	0.0606931	0.16019	0.694701	1.99244	0.920107	0	0	0.251929	0.266649	0
b0141	0	0	0.158901	0	0	0.234786	0.581831	3.69901	0.168572	0	0	0.230779	0	0
b0142	17.8514	10.5996	14.3495	4.6692	8.5514	18.9794	25.6353	19.8494	16.696	0	0	18.7563	19.3541	7.38994
b0143	13.5907	7.59785	8.20736	3.18643	4.04952	16.3062	15.4504	9.31705	10.7729	14.7979	0	40.1639	7.29895	2.22085
b0144	2.42589	4.48132	4.01009	2.87514	1.67269	8.3649	4.17466	6.55083	5.25511	0	0	6.14375	2.51407	1.25531
b0145	49.828	48.9161	21.9646	17.5945	9.837	126.952	56.5343	163.365	165.303	259.179	204.721	315.623	39.4046	12.3764
b0146	6.31665	2.02416	2.22287	1.18013	1.50639	5.01306	3.74833	8.027	7.69503	10.6675	0	47.1681	10.0711	4.66947
b0147	0	2.31356	0.568312	1.07487	0.530255	1.95933	1.90751	5.10614	5.62706	8.63652	37.52	7.09829	8.38664	7.56089
b0148	1.69507	2.43543	1.83137	1.57023	1.33965	3.51775	3.73286	3.47039	3.00491	0	0	3.65276	4.14395	1.16951
b0149	1.07812	2.774	1.79381	1.83588	1.12159	2.5472	2.60169	3.65342	4.30024	4.24833	0	9.48707	1.26055	2.04558
b0150	2.05909	0.815084	0.747489	0.218795	0.403515	0.828344	0.830874	2.12601	2.1807	2.43416	0	2.01613	40.9715	7.24541
b0151	0.749238	1.18633	1.06852	0.183722	0.271901	1.50704	1.68949	2.73731	3.09151	8.85716	19.2393	1.58007	69.7629	25.5884
b0152	0.640534	0.507107	0.581316	0.0523555	0.0464904	1.16569	0.836211	2.44191	1.40959	0	0	1.92975	35.9482	21.8758
b0153	2.84304	2.40713	1.41297	0.852068	0.636245	2.67775	2.27755	2.10749	2.41137	0	0	0.44611	3.7774	5.39427
b0154	14.7348	10.2992	12.0817	4.39435	5.60743	18.0803	21.4102	11.5763	14.4055	7.06167	0	22.031	10.54	1.64858
b0155	2.80261	9.29127	6.72212	6.84369	4.19544	6.54325	5.40502	6.06562	5.49297	6.2121	0	7.92898	4.13329	0.362561
b0156	43.216	43.9078	34.7383	17.3085	13.4876	75.336	66.676	82.3763	70.7329	102.176	0	56.3107	75.793	0
b0157	7.6847	6.80821	9.5362	2.5125	4.62144	11.9873	19.9343	11.8581	11.1735	6.48893	0	4.75441	28.7054	0
b0158	0.745159	0.786584	1.15932	0.548164	0.973513	1.57021	1.59185	4.02442	3.68961	8.80893	0	15.0132	25.4246	0
b0159	11.8877	14.4791	10.3144	10.9873	9.95556	8.8463	5.7519	19.7546	22.1359	37.8353	0	94.5637	44.322	0
b0160	2.91423	2.13628	4.07216	1.3498	2.13867	2.57422	5.03424	3.3947	2.8503	3.82786	0	6.98724	0.206506	0
b0161	4.54261	1.56764	0.770164	0.714039	0.431154	2.71103	2.61267	4.60698	4.61385	10.3271	8.97286	31.6349	1.89423	0.361636
b0162	3.16528	1.31263	0.820757	0.480482	0.656395	1.47258	1.7173	2.8731	3.48283	0	0	6.9137	0.720952	0
b0163	29.9695	9.88612	8.54819	6.12406	6.09058	20.0939	10.3148	27.1351	31.7395	53.1429	0	80.3581	6.68959	0
b0164	1.45855	1.73209	1.79646	1.07296	1.6938	3.42274	2.94274	7.29808	5.41646	0	0	4.50408	1.86039	0
b0166	32.8466	19.2207	7.86907	12.8403	3.78335	91.1694	13.7287	65.1059	69.0427	63.3094	73.3434	101.082	10.9294	8.12894
b0167	1.35562	0.380104	0.483327	0.26316	0.393566	0.649222	0.945205	1.39967	1.16532	0	0	4.07772	6.64621	1.57833
b0168	2.26009	4.37384	1.56277	2.27837	0.710833	9.01987	1.69879	19.7453	17.7186	31.1707	0	51.777	33.3918	5.45771
b0169	428.696	137.716	461.642	80.4449	214.675	716.224	1619.91	376.107	328.983	433.368	287.942	537.667	323.736	25.8881
b0170	245.531	22.4983	81.528	9.97876	26.3352	147.573	402.13	120.363	93.8066	237.849	192.648	265.708	241.624	29.6457
b0171	18.9765	19.5762	25.1622	7.54391	12.8342	28.9993	50.7757	26.855	20.5243	0	0	30.0148	100.669	51.7762
b0172	114.643	17.7655	16.9374	10.7871	6.09552	74.0566	59.6447	121.122	117.344	204.865	136.924	199.904	323.061	111.749
b0173	2.6083	2.23111	1.5177	0.815075	1.03845	2.20096	1.23493	2.20382	3.87609	2.56268	0	17.0296	46.038	19.2942
b0174	60.933	3.386	5.40637	1.63866	3.25941	7.60417	18.5586	21.2727	20.1842	18.9599	20.592	52.6982	65.9738	37.3466
b0175	44.5698	4.81168	7.09175	3.36702	4.26419	7.8912	13.7048	15.7685	15.3254	35.9239	17.3406	11.2914	48.2355	27.2565
b0176	17.1231	14.4895	12.8857	7.45436	6.56526	22.7474	17.1852	21.4047	22.7832	17.6019	9.55858	41.6763	24.452	53.9339
b0177	9.96833	13.6495	7.16912	9.57755	5.85632	20.2848	10.9823	13.9521	15.6765	15.5639	0	76.5813	9.65593	55.2807
b0178	111.344	36.7295	29.5482	16.4955	16.2892	129.311	66.8982	209.476	179.226	236.516	0	169.429	172.532	451.929
b0179	44.9736	15.2893	25.9986	8.6062	12.3272	46.7257	53.8147	56.0584	52.3963	65.6754	0	121.884	57.8701	117.73
b0180	95.6697	14.9904	34.6266	6.67939	8.96903	87.244	109.757	105.111	100.059	200.275	0	235.31	452.517	282.594
b0181	74.6514	19.1978	21.9248	9.89984	10.4495	58.7346	61.1138	73.8104	76.7972	112.563	117.363	74.0692	178.291	104.062
b0182	10.961	13.318	10.1845	5.1889	4.90595	15.1795	15.6104	16.6857	17.3372	25.8262	0	30.2708	96.5553	59.5552
b0183	8.28264	3.43479	3.06812	2.51457	1.7176	7.70666	7.02137	8.26989	11.5547	17.016	0	36.5834	79.9887	71.0244
b0184	4.44491	5.78123	3.40829	3.68504	1.98177	5.70498	4.68744	10.026	7.96506	8.25718	6.52219	21.2109	4.5356	6.8345
b0185	17.3486	4.34934	3.22391	1.74889	1.00733	7.75455	7.48083	18.4635	17.8164	27.3449	29.6989	36.0856	4.05683	2.99241
b0186	0	0.257708	0.225082	0.106427	0.110255	0.228643	0.386324	1.17202	0.716342	1.2827	0	2.25558	0.484394	0.244802
b0187	4.31405	3.09577	0.760456	0.958853	1.0643	7.02261	4.87283	10.2488	3.63032	0	75.308	12.0384	13.0925	2.76199
b0188	3.3418	2.7372	2.2328	1.47164	1.10792	4.6862	3.99489	4.16558	3.12236	0	0	4.51041	2.62099	0
b0189	361.24	240.949	345.262	68.4102	143.583	542.939	532.772	398.84	538.946	112.433	0	98.8547	54.5899	0
b0190	4.20708	9.33437	3.77659	3.62809	1.91286	8.23733	3.6217	14.5421	9.92069	0	0	15.0443	12.3848	0
b0191	4.6683	5.6368	4.61549	2.71583	2.92836	11.5934	6.19667	18.8495	17.3005	14.0281	0	18.0541	22.7037	2.4562
b0192	3.56254	3.05548	3.00223	1.45596	1.16357	5.03313	5.28507	9.19579	8.45236	10.5287	0	14.3218	8.80406	0
b0193	2.14217	0.188438	0.925773	0.46692	0.46644	1.43628	0.593214	3.06247	4.61594	0	0	1.66722	12.5232	0
b0194	7.26695	2.98724	0.942158	1.27934	0.791159	4.17628	2.48783	8.03587	7.34246	18.1725	14.3541	56.0911	43.5822	1.73556
b0195	8.06821	4.25837	10.3442	4.39649	8.97914	12.6223	27.1304	7.54722	11.4669	0	0	7.73108	9.71931	0
b0196	34.436	30.0589	66.9692	29.2295	59.6006	48.7143	111.918	29.0331	33.883	62.6287	68.0201	59.4545	29.5637	2.74143
b0197	5.80329	2.68008	2.91553	1.42303	1.00036	7.43454	6.62912	9.6792	13.3696	8.57548	0	33.7927	11.3345	3.00298
b0198	1.52342	0.670494	1.0541	0.996827	1.18021	3.30967	3.37721	3.55155	2.79562	0	0	6.5829	21.3887	2.10357
b0199	1.31313	1.10846	0.476501	0.600816	0.571617	0.955506	1.18394	2.08502	1.37207	3.1034	0	5.83291	11.7196	0.543378
b0200	3.77837	0.830919	0.979729	0.926499	0.731296	4.46345	0.747367	22.8068	18.7084	29.7774	32.3408	12.7112	24.8998	0
b0202	0	0	0	0	0	0	0	0	0	0	0	41.1228	2437.43	282.528
b0203	0	0	0	0	0	0	0	0	0	0	0	98.2545	788.176	284.229
b0206	0	0	0	0	0	0	0	0	0	0	0	210.754	348.204	0
b0207	0	0.684534	0.0960865	0.121155	0.107582	1.49072	0.703658	2.58994	1.12128	0	0	2.14907	0	0
b0208	0	0.733208	0.160096	0.201864	0.134438	1.30103	0.806032	1.66726	1.61347	0	0	4.53402	0.590638	0
b0209	11.9225	1.37652	2.0288	0.609072	0.973513	2.35532	2.91839	13.0202	12.8112	4.40447	0	24.0772	0.237613	0.771183
b0210	2.19563	2.75225	1.99264	1.43572	1.75296	4.41636	5.73274	11.3349	15.7033	6.48893	0	10.2116	0.700133	0
b0211	12.5877	18.2215	13.728	9.62311	8.14202	17.1633	15.9059	20.1715	17.8733	17.5067	19.0137	74.9685	2.59725	0.383158
b0212	6.49142	1.49894	2.73524	0.729562	1.06009	3.96375	5.00765	8.50687	6.58463	4.79617	0	19.6486	2.06996	0
b0213	0	27.4889	11.4792	21.5691	4.15818	19.8712	9.68385	16.9598	11.939	5.13078	0	8.92425	0.553593	0
b0214	1.88341	3.97622	2.44183	2.00128	2.46058	14.071	7.82335	20.0445	15.2836	22.2648	0	28.5128	1.80172	1.94918
b0215	3.40732	1.01158	1.32528	0.696262	0.68009	2.6109	2.02192	3.38275	5.97521	10.07	0	18.5738	2.71628	0
b0216	0	0	0	0	0	0	0	0	0	0	0	267.298	304.679	141.264
b0217	1.53202	1.21289	1.98627	0.37567	0.277988	3.00819	4.54555	6.32725	3.79287	4.52773	0	2.42317	0	0
b0218	0	0	0.598004	0	0	0	0.547411	6.59403	1.90319	0	0	0.433515	0	0
b0219	5.51646	1.76774	2.34997	0.772971	1.14397	2.11352	1.68351	6.75978	5.63632	9.31617	0	11.3963	1.00518	0
b0220	1.83296	11.3673	7.12928	2.24731	2.26163	14.2208	8.04887	11.3552	10.5884	10.8342	0	14.1506	0	0
b0221	0.374107	0.394904	0.630538	0.290495	0.2308	0.232914	0.843588	0.77253	0.746094	1.10563	0	0.253594	0	0.193586
b0222	2.49594	113.292	33.816	90.071	22.1917	97.4201	27.5485	48.3694	62.4792	59.0118	0	35.1071	3.97948	1.29156
b0223	7.13367	19.3486	9.55708	9.07023	4.42978	25.4332	15.0512	21.2781	19.5143	18.7402	0	34.1481	2.52751	0.820312
b0224	27.5952	5.29622	9.8658	2.52895	3.39881	13.1356	16.9706	26.4331	20.3574	4.94269	0	40.6551	4.53304	0.865421
b0225	0	42.2223	10.7558	11.6245	3.44075	102.165	19.6916	99.7756	76.6125	70.0514	0	274.484	52.9081	0
b0226	0	116.171	21.9513	45.6691	8.60215	162.172	26.1224	150.61	111.779	0	0	376.193	70.1865	0
b0227	0.821165	0.108352	0.106464	0.268479	0.119201	0.314613	0.0974566	1.30439	0.564716	0	0	1.63899	0.26185	0
b0228	0	0.873806	0.858579	0.541288	0.240325	0.31715	2.16134	4.47068	1.59396	0	0	4.8631	0	0
b0229	0.280644	0.444369	0.473011	0.412903	0.346279	0.510735	0.865985	1.0699	0.771997	0	0	0.285358	0.0894907	0
b0230	0	0.107067	0.315604	0.198971	0.471151	0.854927	1.34821	0.902244	1.22764	0	0	0.275019	0	0
b0231	2.03763	1.07545	1.32089	0.458013	0.776435	2.34203	2.72056	3.39853	2.80256	3.01099	0	4.56575	0	0
b0232	0	3.52356	3.46216	1.45514	0.646063	17.0518	27.4669	28.2788	26.9344	0	0	29.499	0	0
b0233	2.75559	2.18158	1.78631	1.3514	2.00002	6.07055	11.4463	8.75427	7.20108	0	0	15.6697	0	0
b0234	2.02257	0.80063	1.57336	0.495958	1.6148	3.29336	5.04086	5.46172	3.06004	23.91	0	7.84533	0.64495	0
b0235	0	0	0	0	1.09163	4.32177	1.78499	7.16722	18.6177	0	0	9.49959	0	0
b0236	0	4.31681	3.39327	3.20891	2.96816	5.48379	4.07687	10.3935	11.2493	0	0	0.184807	0	0
b0237	14.6151	11.3465	11.6775	8.50109	6.88269	12.5663	12.9485	15.657	14.4451	12.0539	0	101.502	8.12861	2.11054
b0238	37.3257	16.5898	4.32987	5.94122	2.56653	21.8272	4.89615	49.3046	54.31	81.2824	0	48.9019	17.5402	2.03312
b0239	3.30117	10.8896	3.15647	9.20788	1.9767	7.94437	2.79147	6.09588	5.61878	2.43906	0	8.59354	1.84216	0
b0240	54.024	99.7978	22.4134	56.5218	12.9396	97.5404	20.5172	57.0669	62.416	31.9324	0	71.7159	13.7816	2.79554
b0241	0.509408	0.873806	0.660446	0.374738	0.184866	2.00049	0.725484	2.02293	1.61147	3.01099	0	0.115103	0	0
b0242	4.32698	3.23533	2.18164	1.88627	1.11664	7.64429	5.07824	13.1355	11.7704	11.367	12.3456	18.8479	39.4001	3.48297
b0243	5.31631	3.61533	2.43891	1.93872	1.48408	8.26486	5.29023	11.9525	14.9054	2.41719	0	18.2805	32.0792	2.9626
b0244	0	0	0	0	0	0	0	0	0	0	0	165.481	613.026	0
b0245	0	5.88799	4.62831	0.729475	3.56266	7.69342	7.41429	11.3411	10.4337	0	0	0.168047	0	0
b0246	0	2.38192	5.46097	0.491835	4.80411	4.6108	5.71308	11.4698	6.62093	0	0	0.45321	0	0
b0247	0	0.238661	0	0	0.393837	0.34649	1.07331	2.01117	2.48774	0	0	0.136231	0	0
b0248	0	5.96195	8.91444	7.2258	14.5437	3.76331	7.4608	3.74465	4.59338	0	50.4455	0.147963	0.626435	0
b0249	0	9.93082	32.5259	16.4047	29.1339	26.4324	35.7289	43.8356	62.1098	0	0	1.88955	0	0
b0250	11.3004	1.49108	2.19765	2.15522	2.18718	3.78834	6.03516	4.78674	7.25323	0	0	9.29148	0.600573	0
b0251	0	0.558515	2.46952	1.21092	1.07527	3.24343	4.52118	3.02564	4.65745	0	0	2.94897	0.67487	0
b0252	0	2.08369	3.16414	1.34943	2.44863	2.54386	2.30011	1.7103	2.17198	0	0	0.243286	0.22889	0
b0253	0.668701	0.970579	0.693576	0.163973	0.388278	1.47315	1.74597	2.44307	2.66723	0	0	3.1982	0.213233	0
b0254	0	1.26186	0.661266	0.833785	0.323917	0.48853	0.529656	1.51908	1.75378	0	0	1.12845	0.406599	0
b0256	1.82076	1.80186	1.88849	1.00456	1.58583	3.18275	2.97124	7.08591	6.76157	2.69053	0	11.1252	1.01605	0
b0258	0.916479	0.42325	0.712928	0.299641	0.432371	0.965609	0.978917	2.83879	1.32355	0	0	2.36077	1.31509	0.474243
b0259	25.6949	7.34589	10.4104	4.68175	6.76044	23.073	27.0007	42.941	38.5803	25.3128	13.7459	44.6326	32.6032	31.5783
b0260	0	0.281677	0.50741	0.261732	0.439	0.306707	0.38003	0.395611	0.636162	4.206	0	0.174184	1.13453	0
b0261	1.80344	0.396603	1.16908	0.442223	0.785367	1.32432	1.2842	3.34213	4.0514	3.55324	0	7.33491	2.68367	0.62214
b0262	0	0.611774	0.267161	0.336862	0.224344	0.641463	0.427978	1.3093	1.34625	0	0	0.543213	0.328544	0.533151
b0263	0	0	0	0.677949	0.602002	1.58889	1.47656	4.61128	3.99278	0	0	2.83987	2.64484	4.29197
b0264	6.46587	29.4342	24.7298	11.4949	14.1962	36.8494	32.8053	57.5163	49.3571	47.7729	20.7542	5.23522	1.0309	0
b0265	62.8783	26.5495	32.6086	8.22318	20.9932	56.6128	50.7447	225.728	230.044	743.319	0	40.7285	12.0302	0
b0266	8.1301	2.6819	6.85143	0.664532	2.6554	4.67233	5.78933	7.7486	7.82751	24.0276	0	8.04348	0	0
b0267	0	0.0598629	0.235279	0	0.0658571	0.0434548	0.107687	0.576525	0.499196	0	0	0.0854263	0	0
b0268	0.623039	0	0.24233	0.203702	0.361764	0.238705	0.221828	1.38554	0.59985	0	0	3.96526	0.397344	0
b0269	0.716966	0.283809	0.433788	0.214877	0.346919	0.412037	0.652358	1.67034	1.24908	0	0	2.38502	0.0762077	0
b0270	0	0.239082	0.375865	0.148102	0.289324	0.242971	0.387074	0.633197	0.59811	0	0	0.491296	0.346668	0
b0271	0	0.119418	0.234674	0.0986329	0.0437918	0.173372	0.787673	0.670882	0.871347	0	0	0.806623	0.288593	0
b0272	2.41994	2.6609	1.35956	1.51646	0.526921	1.8543	3.35067	4.99716	6.10204	4.7679	0	3.37191	3.8583	1.66963
b0273	0.543818	0.215269	0	0.0889003	0.197353	0.416706	0.193622	0.691066	0.673171	0	0	1.57694	1.38728	0
b0274	6.46587	32.4202	21.5862	10.57	11.3804	37.0042	31.0787	57.0027	48.2454	47.7729	20.7542	4.38298	1.0309	1.67292
b0275	75.4539	26.5495	30.9782	10.279	20.0805	59.0219	55.2222	211.745	216.207	817.651	0	38.8342	8.02014	0
b0276	3.40732	3.93394	7.28902	1.94953	2.3494	5.62975	8.99755	6.49487	4.2178	5.03498	0	1.07005	0.271628	0
b0277	2.17816	1.14962	2.68278	0.534109	0.39523	3.02513	4.52385	5.18987	3.29542	0	0	1.35345	0.694561	0
b0278	0	0.361977	0.474227	0.0747435	0.199111	0.437936	0.976737	2.75984	2.13812	0	0	0.929796	0	0
b0279	0	0	0.175973	0	0	0.0650027	0.322171	1.40141	1.49346	0	0	0.638932	0	0
b0280	2.14965	5.38923	2.50831	2.28418	0.780113	10.089	6.63317	38.2438	26.314	25.4122	0	82.8966	4.79829	0
b0281	1.07015	1.27085	1.98868	0.379043	0.569598	3.17756	2.58247	4.70305	2.64941	0	0	10.7738	0.796241	0
b0282	0	1.34599	2.9757	0.416892	0.925476	3.90824	1.81596	7.2916	4.55982	0	0		2.43959	2.63927
b0283	0.580739	0.38314	0.602341	0.23734	0.337203	0.500622	0.344613	1.10698	0.639	0	0	0.284311	0.555551	0
b0284	0	0.0555936	0.136562	0.051657	0.0917403	0.0605335	0.200014	0.401556	0.405645	0	0	0.341135	0.201526	0
b0285	0	0.229884	0.527049	0.189872	0.337203	0.222499	0.344613	1.10698	0.559125	0	0	0.415532	0	0
b0286	0	0.86189	0.241963	0.0762724	0.406368	1.43006	0.88597	1.48226	0.256689	0	0	0.527119	0.297556	0
b0287	1.12488	4.00754	2.33345	1.56306	1.38796	12.0673	2.67005	7.50469	7.27169	0	0	6.98974	0	0
b0288	0	14.888	28.5921	4.19205	11.9118	27.5094	37.1294	18.7374	14.8134	0	0	6.37368	0	0
b0289	0.890634	2.70292	3.00223	2.18394	2.19785	1.62084	2.64253	1.98063	2.57246	5.26434	0	1.30808	0.568004	0
b0290	0	0.505228	0.725543	0.433341	0.427551	0.592438	0.803982	1.12286	1.05327	0	0	1.6527	0.0939203	0
b0291	0.180397	0.166622	0.116942	0.103216	0.0654664	0.15551	0.149867	0.630415	0.496235	0	0	0.366853	0.115048	0
b0292	0	0.258596	0.127045	0	0	0.281575	0	0.622619	1.48255	0	0	0.664246	0.62494	0
b0293	0	0.320568	0.944945	0.496447	0.705333	0.232702	0.144167	1.54365	4.8452	0	0	1.6926	0.774703	0
b0294	0	0	0	0	0.087391	0.115327	0	0.191259	2.8153	0	0	0.0906872	0.383944	0
b0295	30.7322	24.3305	31.8754	12.5598	6.69169	11.7744	25.5313	73.2253	76.0845	0	0	3.47204	0	0
b0296	0	12.6358	0	2.60912	1.15842	21.4022	9.47101	48.1698	37.3185	0	0	21.037	0	0
b0297	0	0.254746	0.0834356	0.210407	0	0	0.0763767	1.12447	1.59324	0	0	0.0248588	0	0
b0298	31.998	4.22211	10.3713	3.92314	2.32243	6.1297	0.949389	22.8724	26.4061	0	0	20.4853	5.1017	0
b0299	2.6618	2.37075	0.690203	1.41419	1.30407	3.50562	2.05338	8.98484	10.1594	0	0	0.927229	1.27318	1.37738
b0300	0	0.49589	0.609061	0.230388	0.204579	0.809931	0.892052	1.94016	3.48909	0	0	2.85017	0.599198	0
b0301	0	0.157488	0.154744	0	0.0866288	0.457286	0.708261	0.947955	1.14913	0	0	0.71917	0	0
b0303	0	0	0	0	0	2.53214	15.6874	20.9965	29.0885	0	0	8.96011	0	0
b0304	0	0.85594	0.742081	0.249516	0.221564	0.877174	0.860444	0.606128	0.839726	0	0	0.790352	0	0
b0305	0	0.179094	0.26396	0.166412	0.0492567	0.260011	0.0805427	0.646803	1.21344	0	0	1.48232	0.216405	0
b0306	1.74716	1.95956	0.453038	1.07106	0.443835	2.42654	1.14045	14.4315	13.4571	10.3271	0	87.7395	67.9695	23.5063
b0307	0.697084	0.459898	0.361507	0.256399	0.202379	0.968143	0.744575	6.75446	5.70469	10.3008	0	42.5931	27.0074	9.37858
b0308	5.52353	1.70059	1.19354	0.376231	0.601352	1.67535	1.85736	13.3071	7.21722	16.3242	0	16.9529	45.2072	22.8657
b0310	0.97991	0.387895	0	0.0800951	0.142245	0	0.232593	1.55655	2.02166	0	0	0.184513	0	0
b0311	1.15576	0.343127	0.711757	0.165319	0.104857	0.581182	0.617248	0.550761	0.755074	1.70785	0	1.26222	3.50116	0.89709
b0312	1.67859	0.17719	0.60936	0.329287	0.414232	0.739585	0.757022	1.01322	1.01584	1.98435	0	2.03549	4.49619	1.04233
b0313	4.85896	0.160284	0.157491	0.0992895	0.2645	0.581755	0.576667	1.92957	2.33906	0	0	4.5746	14.7194	0
b0314	1.84118	0.485883	0.328224	0.319797	0.43431	0.374749	0.409711	0.804274	0.91798	0	0	0.580698	0.220165	0
b0315	1.46811	2.19545	2.85511	0.999995	0.710377	3.56236	3.71706	2.95392	2.15386	0	0	2.22994	0.468146	0
b0316	0.601146	3.41078	2.64991	2.99729	1.39621	4.26086	4.20933	6.11133	5.29163	7.10647	0	10.0968	0.191691	0
b0317	0	0	0	0.270644	0	0	0.39297	1.57789	1.82166	0	0	0.124695	0	0
b0318	0	1.21744	0	0.0942692	0.251126	0.220936	0.273755	1.4656	1.74491	0	0	1.99792	0	0
b0319	0	0.352938	0.086697	0	0.0970695	0.0640499	0.238086	1.48709	0.919733	0	0	0.327375	0.213233	0
b0320	0	0.083476	0.123032	0.0517101	0.114793	0	0.0375411	0.803936	0.304546	0	0	0.226334	0	0
b0321	0	0.231719	0.182145	0.0574163	0.331398	0.470978	0.33347	0.390535	0.483076	0	0	0.224856	0.111997	0
b0322	84.3276	57.8601	59.0385	44.1133	38.5594	131.657	119.096	318.803	300.399	49.8441	0		747.543	384
b0323	0	0.309135	0.227811	0.0957485	0.297578	0.448806	0.417076	0.930376	0.725028	0	0	0.198516	0.373537	0
b0324	1.44954	0.382531	0.986647	0.444305	0.578647	1.04131	2.58049	2.12985	2.09339	0	0	2.3473	0.693335	0
b0325	2.56614	0.40632	0.3327	0.167799	0.186252	0.589899	0.852746	1.22286	1.62356	0	0	5.5084	0.327312	0
b0326	0	0.0957172	0.470247	0	0	0	0.34437	0.576143	1.0975	0	0	0	0	0
b0327	45.0447	71.3232	99.2806	20.25	21.2509	77.6609	74.8433	125.215	127.007	0	0	50.0421	0	0
b0328	0.972944	1.41217	1.38756	2.30625	0.635552	2.51616	1.27017	3.55461	3.07784	0	0	1.24577	0	0
b0329	0	3.31869	4.89129	2.0558	1.8255	1.20453	4.47747	9.98795	19.0262	0	0	87.6137	0	0
b0330	0.307092	0.0405205	0.0796289	0.0251009	0.0668668	0.0588282	0.109338	0.341463	0.591326	0	0	0.242861	0	0
b0331	0.640534	0.253554	0.249135	0.104711	0.371923	0.61352	0.608154	0.508731	0.880992	0	0	0.12061	0	0
b0333	0	0.412208	0.115722	0.0729562	0.097175	0.0427463	0.264828	0.496234	0.491057	0	0	0.0672268	0.284619	0
b0334	0	0	0.0885723	0.08376	0.0991691	0	0.162157	0.217036	0.281888	0	0	0.167228	0.108922	0
b0335	0.501628	1.12522	1.9836	0.697028	1.14687	0.840826	1.39904	0.597612	0.793431	0	0	0.132236	0.0799785	0
b0336	0.406517	1.66283	1.15951	0.631324	0.472084	2.80348	1.44738	1.42062	1.06234	0	0	3.16898	13.3517	0.420715
b0337	4.3679	0.785918	0.720742	0.584214	1.03754	2.16791	1.64941	3.27989	3.27688	2.34706	0	11.0508	13.1685	1.23285
b0338	1.26333	0.166695	0.327581	0.258153	0.229233	0.544523	1.04953	1.50506	1.82447	3.73363	0	1.40349	1.20854	0.653726
b0339	0	0.264273	0.64917	0	0.290735	0.383674	0.594248	0.636286	0.964149	0	0	0.301701	0.319329	0
b0340	0	1.47084	0	0.151855	0.404529	1.42359	0.66147	1.18044	1.53317	0	0	0.629681	0	0
b0341	0.907365	0.478903	0.882297	0.111248	0.296357	0.564913	0.484591	1.00892	1.37279	0	0	0.205023	0.144668	0
b0342	0	0	0.294099	0.185414	0.493928	0.325911	0.269217	2.16197	1.24799	0	0	1.6231	3.97838	45.7789
b0343	0	0.0539601	0.15906	0.0668523	0.207771	0.27419	0.0485342	0.779514	0.843699	0	0	0.26181	55.5518	80.8367
b0344	0.145339	0.153419	0.131902	0.0831571	0.0316464	0.0696047	0.0862448	0.39247	0.299849	0	0	1.92114	63.8172	58.5113
b0345	2.46448	3.64208	1.02246	1.61152	1.14479	4.72108	2.04741	7.67286	4.40655	2.9134	0	3.95371	1.25738	0.51011
b0346	0.703052	0.092767	0.0911506	0.0574655	0	0.13468	0.0834389	1.34012	1.25707	0	0	0.317716	0	0
b0347	0	0.0765738	0.0752395	0.0474344	0.0631809	0.083378	0.103311	0.691371	0.359183	0	0	0.0764913	0.277579	0
b0348	0	0	0	0	0	0.11317	0	0.656885	0.568779	0	0	0.0222477	0.753524	0
b0349	0	0	0	0	0.0965975	0.127477	0	0.845632	0.732209	0	0	0.0751807	0.636588	0
b0350	0	0.290228	0.190114	0.0599283	0.319289	0.561809	0.783134	1.16463	0.605053	0	0	0.193277	0.233794	0
b0351	0.58571	0	0.455623	0.0478742	0.0425112	0.841511	0.973176	0.651263	1.04726	0	0	0.308802	0.373537	0
b0352	0	0.0709109	0.348376	0.087853	0.0390057	0.617696	0.829147	0.939022	1.10874	0	0	0.242861	0.342735	0
b0353	0	0.394212	0.608681	0.244198	0.464662	0.858481	1.01306	0.813547	1.52626	0	0	0.401823	0	0
b0354	2.8316	0.934068	1.28491	0.694342	1.0276	3.39023	3.69663	17.9915	15.1889	8.36849	36.3556	12.9029	8.12637	1.46525
b0355	10.5458	2.13364	2.91682	0.747051	1.68392	9.49496	16.2706	11.9494	8.41272	4.15558	0	7.88994	4.9321	0.727606
b0356	12.413	3.33875	7.48961	1.44385	3.08399	14.999	28.5004	8.26617	9.8497	8.46579	0	9.22336	3.80595	0.98819
b0357	125.757	159.297	215.217	49.3391	107.704	350.518	704.456	163.802	185.073	148.664	0	27.4681	100.252	0
b0358	0.783554	0.413557	0.711114	0.320228	0.568708	0.600407	1.11592	2.36482	1.29324	0	0	0.767207	0.249857	0
b0360	3.5395	0.934068	2.29448	2.02516	2.31209	5.42436	3.78065	12.3692	17.5257	62.7637	0	13.3294	42.8892	7.32624
b0361	6.88477	6.68941	3.89502	3.17181	3.22534	5.99491	4.23402	13.5211	14.8927	14.7979	0	4.2191	13.1723	2.59099
b0363	0	0.57208	0.393478	0.212628	0.220277	0.498331	0.463099	0.757564	0.29816	0	0	0.310223	0	0
b0364	0	0.175896	0	0	0.0967543	0	0.158209	0.847004	0.550048	0	0	0.200807	0	0
b0365	0	0	0.298636	0.094137	0.0417957	0.110313	0	0.457359	0.316811	0	0	0.10843	1.28538	0
b0366	0	0.209174	0	0.0647873	0.0575296	0.22776	0.470351	0.251812	0.436074	0	0	0.0895492	1.5165	0
b0367	0	0	0	0	0.206231	0.408235	0.50583	0.225672	0.683912	0	0	0.0802534	1.35908	0
b0368	0	0.719946	0.618976	0.278736	0.594026	0.718593	0.809441	1.84174	1.96994	0	0	0.565062	0.434966	0
b0369	3.39792	2.46594	1.2482	1.06466	1.47974	3.63432	1.20981	9.26564	10.5933	10.0422	14.5422	26.8508	8.12637	2.93049
b0372	2.6618	2.37075	0.776479	1.41419	1.30407	3.44188	2.05338	8.98484	10.0679	0	0	1.47855	1.27318	1.37738
b0373	31.998	4.22211	10.3713	4.577	2.32243	6.1297	0.949389	26.6845	25.3058	0	0	21.389	7.65255	0
b0375	0	0.434566	0.711657	0.0897322	0.07968	0.525757	0.521159	2.79013	3.32186	0	0	0.537455	0	0
b0376	1.35655	0.596651	0.410378	0.147841	0.262558	0.69298	0.48299	2.80127	2.73651	5.34551	0	8.36115	1.29771	0.467975
b0377	1.26853	1.28326	1.2609	0.380184	0.797949	1.70105	2.55937	2.01502	2.61712	2.49934	0	2.14973	1.88769	0
b0378	1.94359	1.28227	1.44892	0.47659	0.8464	1.86162	2.53733	2.31548	3.54201	5.74405	0	4.92227	2.16917	0
b0379	13.7798	0.909114	5.35964	2.8158	2.00029	6.59931	6.54159	15.322	8.52873	0	0	1.81627	0	0
b0380	115.929	509.891	971.952	243.21	434.734	592.213	1123.62	478.787	462.403	228.41	0	78.5842	49.2894	39.9926
b0381	4.85896	3.59036	7.37057	2.58153	2.82133	8.74959	12.975	13.0439	10.9602	17.2322	0	32.4248	11.6205	1.00573
b0382	50.7937	2.23406	0	2.76782	0	11.352	6.02825	24.2051	18.6298	0	0	326.459	59.3886	0
b0383	0	0.371705	0.365228	0.201474	0.255577	0.404734	0.626865	1.28649	1.59825	0	0	4.98608	2.35799	0
b0384	0	5.32876	16.4557	1.41469	6.69981	9.94674	14.3788	16.4957	11.1091	0	0	20.8575	12.8778	0
b0385	0	0.437912	0.368812	0.193764	0.24088	0.49953	0.33761	0.903732	0.782516	2.80238	0	0.339239	0	0
b0386	0.733183	0.580457	0.380228	0.898924	0.159645	0.983166	0.17403	1.39756	1.916	4.33368	0	8.42136	0.701383	0
b0387	5.89353	2.85137	3.56578	0.963441	1.14068	3.01065	4.89615	14.6665	14.0503	11.6118	0	13.7606	4.38504	0
b0388	22.3954	7.68313	13.7435	3.17293	5.63497	15.8737	18.7826	22.056	16.6335	0	0	38.2899	3.80872	0
b0389	459.322	134.682	158.803	75.0873	85.1967	332.407	466.387	494.516	357.993	301.661	0	999.419	81.3703	0
b0390	1.91861	1.89869	0.870616	0.94093	0.696269	3.49162	2.84628	7.00956	3.16663	0	0	6.10539	1.5295	0
b0391	52.7104	154.403	19.1349	96.5081	4.5909	173.677	16.2649	202.623	150.796	124.624	0	232.645	13.4465	0
b0392	0	8.24318	1.73562	3.64737	0.971633	19.2336	4.23674	26.2264	14.1162	0	0	7.39406	1.42293	0
b0393	1.24043	1.06388	0.804108	0.65903	0.450156	3.26732	1.39855	6.10816	5.7154	10.9979	0	16.2563	14.4373	1.92563
b0394	0.623039	1.56198	2.66564	0.865732	1.35662	6.20633	4.21474	4.84939	4.37034	7.36528	0	4.15296	3.17875	0
b0396	0.439126	9.09692	4.15608	5.0609	2.48602	5.9726	3.85657	4.88273	4.95259	2.59557	0	1.04184	0.140027	1.81785
b0397	0.566907	0.374014	0.220498	0.220103	0.102866	0.529423	0.319585	1.19317	1.03314	0	0	4.33389	0.903865	1.46676
b0398	0.430832	0.795869	0.670287	0.598654	0.75048	1.03165	1.53395	1.64246	1.89621	0	0	5.61375	3.57193	1.78351
b0399	0.933142	1.10814	1.93571	0.228817	0.745008	3.30701	4.09761	2.22339	2.43855	0	0	3.44385	2.0829	0
b0400	1.17758	0.569728	0.661582	0.288756	0.455837	1.12791	0.698781	1.05997	1.72762	2.32013	0	1.13823	0.751003	0
b0401	9.20933	4.86065	4.02971	3.1678	3.5649	6.39517	5.00945	10.4229	11.0304	2.26809	9.85338	5.92475	4.89439	0.794246
b0402	3.28758	2.40996	2.32061	1.52273	1.35215	3.63876	3.90173	4.40985	4.92368	4.31826	0	9.31306	2.32962	1.13413
b0403	0.787059	0.969282	1.36056	0.664764	0.799753	1.15593	1.93045	1.62527	1.47945	0	0	1.84756	0.334632	0.271515
b0404	3.71008	3.26361	8.97888	2.72926	5.8344	7.46258	14.6772	6.67909	6.9739	0	0	3.53953	0	0
b0405	4.5009	5.47698	6.28928	2.73874	2.90381	10.6819	6.1133	8.65884	8.94191	8.86795	0	14.6712	15.1496	3.62296
b0406	14.4966	13.7599	40.8637	7.91217	19.8216	51.465	98.6776	27.9299	27.271	8.29224	0	38.4089	21.3237	23.2303
b0407	202.725	107.65	341.041	56.9852	142.474	593.892	991.138	412.343	386.279	204.581	0	553.031	583.374	491.251
b0408	13.3606	6.98388	17.6218	4.20023	7.14238	31.5007	47.3256	24.8552	23.7478	22.7803	0	42.7387	30.1504	27.3886
b0409	16.4915	3.15151	4.71862	1.58038	2.31138	10.2946	12.2158	16.1693	11.3412	30.2517	0	24.5853	37.174	46.4942
b0410	4.18945	4.42235	4.34529	1.71217	1.52036	12.8408	11.4358	59.8929	48.9785	0	0	109.493	8.01548	8.67152
b0411	14.2249	6.2281	4.35915	3.96376	2.29955	31.771	9.66893	74.1549	62.9636	64.9711	0	282.775	15.2574	5.35334
b0412	0	7.28573	1.10135	4.28177	1.23312	3.66144	1.34423	2.02405	3.89459	0	0	3.41234	0	0
b0413	14.3704	7.58463	5.32319	4.53058	4.02304	9.43839	5.8474	14.6744	16.9415	24.2686	0	13.6067	59.5708	0
b0414	4.32698	1.52251	0.872655	1.21821	1.11664	3.13139	1.94	5.11674	6.67873	5.68352	12.3456	14.919	14.7175	5.47323
b0415	146.769	7.84448	7.22605	3.3408	3.91045	17.261	10.5835	33.0523	35.5183	98.8314	0	78.2903	49.7633	32.6863
b0416	212.537	6.37364	2.50503	2.76375	2.62944	20.5886	12.0388	35.6788	34.5473	99.9296	0	241.755	51.5998	47.4913
b0417	9.58778	1.48835	0.877449	0.829776	0.573083	2.53894	2.1419	4.21059	5.5851	6.6672	0	15.9082	6.83399	7.58789
b0418	39.6846	83.3786	20.5804	45.1623	8.08708	47.5136	18.8392	44.611	31.9096	36.0872	0	32.5338	10.2209	20.5353
b0419	5.09689	5.30551	2.79009	2.49963	0.986493	7.2144	2.82288	7.46649	5.91978	0	0	18.1707	1.44469	2.93049
b0420	4.58183	2.28392	1.91411	1.45641	1.21936	4.65678	4.41062	7.68238	9.13769	6.01825	6.53634	15.8839	3.89609	4.47841
b0421	13.265	5.66764	6.22404	3.35598	4.08035	9.37789	9.6707	8.93003	10.8599	18.6682	16.2202	36.5859	10.8768	9.15216
b0422	404.304	310.671	314.507	151.626	136.366	364.473	395.156	215.333	346.732	702.868	0	1287.92	333.682	172.292
b0423	5.13656	1.89774	0.710351	1.06361	0.969318	2.82076	1.01602	5.76585	6.82934	12.1444	0	16.8033	1.63793	1.06319
b0424	14.4487	2.85973	2.02937	1.57466	2.27217	7.26562	3.00086	17.9784	19.5415	14.2338	0	9.74887	6.52704	2.49221
b0425	1.86065	1.39123	1.12575	0.709725	0.855296	3.92078	1.17772	5.71408	7.84802	0	0	9.03906	3.75766	1.28375
b0426	1.69662	54.3998	4.6193	24.1298	2.9554	148.206	11.0746	125.318	129.511	110.312	0	130.023	24.8865	1.75587
b0427	0.736471	2.57518	1.05032	1.23404	0.721622	4.76152	2.05402	4.21147	3.79854	4.35311	0	2.10785	1.99616	3.04877
b0428	16.0134	19.6081	14.3668	7.06799	6.60163	13.8656	15.4319	22.4859	19.7342	15.1442	0	8.44268	157.886	190.254
b0429	41.0295	6.76726	9.974	3.77284	2.23346	24.0707	29.2165	26.0695	45.8511	90.9436	0	9.07767	2536.53	2001.04
b0430	12.3737	1.03899	2.33345	0.551669	0.408224	5.17172	5.47359	6.61128	8.50942	19.9468	0	10.9294	1922.62	688.024
b0431	5.18531	0.870796	0.611159	0.443098	0.290818	1.1062	1.48255	2.32124	2.95001	5.57259	0	4.56231	503.707	153.674
b0432	8.23518	0.38808	0.305054	0.14424	0.0426939	0.957812	0.488679	4.11125	2.50805	6.95376	0	24.6996	1214.34	253.248
b0433	4.35365	19.4874	4.68927	21.9535	5.61491	12.3818	5.84263	12.7672	15.3385	7.91798	0	12.5362	40.5803	1.38637
b0434	8.7358	4.11671	0.970795	2.24412	0.815206	9.56271	3.55465	28.5459	33.2994	29.5059	0	93.008	159.577	7.74933
b0435	72.2073	40.4926	92.0563	33.4448	34.939	114.117	138.542	111.831	75.3131	35.5667	154.514	237.255	5.75629	0
b0436	41.0974	49.6312	41.9664	18.3315	20.4256	65.9068	56.3	61.3646	49.527	76.3455	40.2025	226.788	30.4534	3.64566
b0437	20.8585	6.37364	3.98528	4.03795	1.43424	14.8263	7.42651	28.9476	27.6318	25.9557	28.1901	112.617	100.119	11.3615
b0438	26.8381	6.8711	10.127	4.48556	4.65176	19.4139	21.2503	24.3698	20.9909	21.309	20.5719	79.9205	36.2758	8.29116
b0439	15.6041	3.24284	1.77018	1.54646	0.707846	5.15637	3.00935	7.83871	8.28965	9.22323	10.0172	31.3797	21.3958	4.23912
b0440	2682.94	2446.37	2983.48	1746.73	2697.14	5494.99	4543.33	3742.27	3231.14	3865.94	1028.26	1583.41	310.712	82.8846
b0441	12.9098	1.77024	1.60812	1.13797	0.790021	3.92781	3.03425	7.72017	7.93805	23.9394	13.0001	64.8515	81.4446	3.14369
b0442	6.73086	0.444065	0.872655	0.825242	0.48853	2.5788	1.99706	8.55336	4.16594	0	0	11.4065	70.8282	10.4489
b0443	0	1.09079	0.357261	1.80187	1.20001	2.1115	0.654071	6.56571	2.65303	0	0	2.49055	15.8164	2.85182
b0444	9.20589	11.7827	3.58062	6.47118	1.87087	15.2545	3.4962	12.7222	10.6359	10.8828	23.6393	10.6779	3.22909	1.90548
b0445	1.13186	0.560055	1.02722	0.300674	0.595596	0.569166	0.604486	0.674218	1.24541	0	0	3.27146	0.360923	0.292848
b0446	0.721586	0.666488	0.467767	0.412863	0.366612	1.03673	0.256916	1.83394	2.67967	8.53027	0	4.5381	0	0
b0447	3.92902	10.1094	4.07517	5.94122	1.56844	12.4189	3.2641	10.9219	11.3484	0	0	5.47464	10.6494	4.06624
b0448	1.34794	0.924868	0.384472	0.727167	0.332637	1.83335	0.671894	3.29737	2.33599	3.18695	0	2.14216	1.37544	0.558006
b0449	1.34002	1.48524	0.590694	0.766707	0.311231	1.59155	0.477105	2.89485	2.98577	3.16823	0	2.44246	0.598221	0.554728
b0450	0	1.21722	0	0	0	0.441793	0	5.12869	5.70958	0	0	0.694804	0	0
b0451	1.58373	0.731401	1.18065	0.809061	0.890849	0.98601	0.845815	1.38363	1.6337	2.34027	10.1669	0.521867	0	0
b0452	2.01595	1.33001	0.435613	0.494335	0.292638	3.6044	0.877269	4.26968	4.34397	15.8878	0	10.0719	2.57136	0
b0453	1.27115	1.34182	1.15363	0.623403	0.738088	2.55684	2.41379	5.24985	5.59471	0	0	8.66456	0	0
b0454	0	0	1.14068	0.71914	0.425719	3.08995	0.696119	6.05608	7.26063	34.6694	0	8.72508	0.935177	0
b0455	11594.2	10821.2	17155.6	20544.5	25407.5	3810.4	5693.39	1368.59	3789.16	0	0	6393.16	0	0
b0456	35.5305	2.60456	9.21304	0.645369	2.57882	3.4032	7.02799	19.44	20.6335	46.6695	101.374	5.64953	0	0
b0457	0.94677	0.666268	0.286413	0.464318	0.137434	0.937068	0.412	1.75456	2.60438	1.86538	0	6.51289	0.201268	0
b0458	57.593	2.4514	2.64955	1.06298	1.8878	6.2282	2.2049	5.9022	8.43241	10.9813	0	47.8557	2.9621	3.84545
b0459	16.3145	9.86648	12.3385	3.77826	6.21662	20.1842	19.8463	26.7788	22.439	8.03596	0	27.9548	3.90173	1.40703
b0460	672.158	177.381	321.061	69.3983	174.601	498.106	717.951	876.634	676.336	0	0	1718.61	101.527	0
b0461	39.4159	13.4356	20.8669	6.98045	10.2513	31.7759	36.2539	68.8716	61.4411	19.4149	0	54.1794	9.42659	0
b0462	3.82266	2.11099	1.4134	1.28453	1.01732	3.18681	2.9069	5.5324	5.78347	9.20534	7.27111	24.7874	14.3114	9.67063
b0463	2.1747	3.32861	1.6353	1.84864	0.726067	7.54038	3.45847	8.08333	7.11877	7.71248	22.3371	45.4529	44.9361	23.4067
b0464	0	4.76422	1.87248	1.6021	0.599001	7.50961	1.71406	13.2733	11.6349	0	0	9.71241	0	0
b0465	1.45082	7.67478	3.76197	6.03711	1.99116	6.91027	4.57073	3.79207	4.04535	3.11836	0	7.50508	10.4723	5.59646
b0466	212.48	56.0731	174.471	86.8376	61.6877	373.118	546.376	247.512	243.538	418.641	0	98.689	22.5849	0
b0467	5.90766	1.16926	4.2126	1.20719	2.2511	7.49752	13.4967	5.16124	5.07838	0	0	8.00918	0.470953	0
b0468	9.62303	10.158	4.99049	9.70089	3.49223	8.29546	3.42621	10.7	12.3532	18.9599	0	3.38235	5.11425	6.6394
b0469	43.5054	12.0192	4.75915	5.11176	2.9603	15.6265	5.80867	38.2246	39.2683	64.2877	34.911	80.9972	38.5838	7.03513
b0470	7.32311	4.41267	2.59514	2.07504	1.70085	6.80383	4.14278	13.4549	14.2018	7.21421	0	19.4242	9.49633	4.29469
b0471	87.1877	31.8061	13.9636	19.2834	13.4008	105.616	50.5203	106.722	145.313	181.887	0	466.438	117.75	74.3093
b0472	44.9795	10.3482	4.78489	6.31604	5.35736	29.0531	13.0033	43.9681	52.5059	40.9022	0	71.4473	16.5495	14.3232
b0473	16.1706	4.36741	1.0155	2.91196	0.916933	7.88953	3.5984	9.91334	7.19361	13.4411	0	46.4245	7.73464	1.56894
b0474	31.1835	19.2016	12.3983	9.09089	6.48817	64.7147	24.9193	48.0477	51.4678	18.4319	26.6914	203.67	13.2582	2.1515
b0475	0.575852	1.3677	0.746591	0.800165	0.626935	2.75783	1.02514	5.4883	3.72253	10.2112	0	10.3226	7.34501	0.595963
b0476	0	0.991954	1.12462	0.425406	0.797473	2.1602	1.02947	4.22548	2.46566	0	0	2.2431	0.553204	0
b0477	1.55671	16.5352	4.33929	11.5153	2.5987	17.5199	5.08068	8.46924	9.58144	11.5017	0	18.9503	4.09528	1.20831
b0478	4.89131	11.2756	8.54247	6.3498	5.93083	7.63383	6.41971	4.98172	5.65903	3.40135	0	13.8585	2.38546	0
b0479	0.84569	0.725322	0.657861	0.414746	0.460355	0.607517	0.802938	1.07467	0.988689	0	0	2.64338	0.404505	0
b0480	0.292646	0.579215	0.75883	0.478401	0.169923	1.9341	1.07668	2.55671	2.13328	3.45953	7.51469	7.36188	1.67972	0
b0481	0	1.17774	2.31443	1.31321	0.7774	8.37828	3.60166	11.3425	12.0309	21.1031	0	11.3613	1.13848	0
b0482	6.78026	0.596432	0.58604	0.246311	1.47635	1.15454	0.804688	3.23105	4.97365	22.2648	0	9.24893	0.480458	0
b0483	26.7739	30.0287	17.9347	9.84791	7.12531	75.2246	30.1868	98.5261	125.818	79.1273	0	28.568	1.42293	0
b0484	0	1.24929	0.684579	0.952475	0.370026	1.29054	0.799533	1.64856	1.80308	4.30485	0	6.21915	1.27732	0.188435
b0485	0	0	0	0.147408	0.218158	0.172738	0.428067	1.33685	0.578772	0	0	0.860267	0	0
b0486	0	0.675251	1.48008	0.418291	0.771437	0.527874	1.40158	1.75085	1.51602	0	0	0.518864	0.125527	0
b0487	7.79587	7.88637	9.77042	7.00933	3.77219	11.2006	10.7942	22.2902	11.0799	0	0	13.7985	0.828638	0
b0488	3.92902	8.29488	6.11276	4.01434	3.42205	9.59645	7.22765	12.4822	9.45697	11.6118	0	6.73233	7.51722	0
b0489	0	0.405509	0.318754	0.452154	0.0892225	0.647594	0.364733	1.07397	1.7753	0	0	9.44396	2.54794	0
b0490	0	0.759476	0.124374	0.548876	0.0696269	2.75654	0.113851	4.41907	2.63886	0	0	6.46665	1.83539	0
b0491	0.774684	32.9144	8.73807	24.505	5.67893	16.3985	6.06806	9.59832	12.0402	0	0	1.8963	1.97622	0
b0492	17.6449	5.01463	3.69544	4.43767	2.75838	7.86533	5.31582	10.1333	10.4542	16.0454	0	37.467	15.5811	2.10705
b0493	2.93273	1.3544	0.855513	0.599283	1.75609	1.89611	2.26239	2.67865	3.42863	4.33368	0	23.0552	16.5994	1.51758
b0494	4.35631	4.31108	3.52997	3.20465	4.90085	3.65101	7.62592	8.82278	6.89043	0	0	14.1087	24.3097	2.25423
b0495	1.8791	1.61164	1.09631	0.38398	0.409158	2.24981	3.90273	4.77579	2.71374	0	0	3.11366	3.29559	0.972361
b0496	0.758582	0.175165	0.516337	0.248017	0.385408	0.435953	0.562683	1.29535	0.782516	0	0	1.06414	0.604734	0.196269
b0497	0.101856	0.564473	0.673488	0.249763	0.229176	0.907312	1.13631	0.857511	0.896597	0	0	0.690446	0.064959	0
b0498	3.45027	3.64208	6.70991	1.97411	1.00169	13.5495	11.875	11.5093	13.762	0	0	1.03947	0	0
b0499	0.890634	0.940147	1.38565	0.655181	0.387857	4.35067	2.74824	3.25389	3.18495	0	0	0.337602	0.284002	0
b0501	0	3.37195	2.42967	1.94953	1.60749	2.6109	7.27892	5.14177	5.85805	0	0	0.192475	0	0
b0502	3.36543	3.55252	2.18164	3.30097	2.93118	8.38108	7.98825	17.6413	18.5153	19.8923	0	6.83212	3.21946	3.48297
b0503	0	1.15404	0.69296	1.23119	0.493733	1.30313	0.865	3.39604	3.87616	0	0	3.40351	1.23953	0
b0504	0	0.240071	0	0.148714	0.132055	0.232358	0.143954	0.385343	0.250243	0	0	0.639499	0.19339	0
b0505	1.76216	0	0.228463	0	0	0.337568	0.627403	2.5192	1.21184	0	0	1.52631	1.68573	0
b0506	3.62705	1.24432	0.282148	0.830102	0.526507	3.96046	1.46357	10.0249	7.48299	4.28774	18.6274	21.882	5.08895	1.50149
b0507	0	0.24754	0.0347467	0.0438118	0.0972595	0.0770104	0.031807	0.595999	0.368614	0	0	0.282598	0.25638	0
b0508	0	0.102801	0.101009	0	0	0	0	0.371268	0.107157	0	0	0.11736	0.496868	0
b0509	0	0	0.0846295	0.160063	0	0.125045	0.232409	0.207375	0.35912	0	0	0.196657	0	0
b0511	0	0	0.0441759	0	0.0247306	0.0326362	0	0.216496	0.468644	0	0	0.0898217	0	0
b0512	0	0.0487194	0.335093	0.0603594	0.160793	0.0707313	0.350563	0.175951	0.710973	0	0	0.639622	0.235476	0
b0513	0.390288	0.051498	0.151802	0.223307	0	0.261679	0.0926394	0.247982	0.483122	0	0	0.0734894	0.124453	0
b0514	0.458239	0.302321	0.534696	0.149821	0.365852	0.570587	0.598227	0.946263	1.13447	2.70855	0	0.103541	0.146121	0
b0515	1.53202	0.202149	0.397253	0.0626117	0.111195	0.586965	1.36367	0.851745	0.84286	0	0	3.1732	0.732788	0
b0516	0	1.04396	1.34969	0.987054	0.453352	0.95724	1.58145	1.19062	1.20274	0	0	0.893857	0.398351	0
b0517	0	0.0677199	0.0665399	0.0419498	0.0745008	0.245791	0.121821	0.407621	0.776484	0	0	0.0773108	0.163656	0
b0518	0	0	0.150161	0	0	0	0.0687282	0.229969	0.278774	0	0	0.0654252	0	0
b0520	0	0.191434	0.188099	0	0.105301	0.486372	0.516555	1.6132	0.199546	0	0	0.218546	0	0
b0521	0.63755	0.252372	0.330633	0.104223	0.138821	0.244265	0.378325	0.91145	0.613822	0	0	0.360144	0	0
b0522	4.01548	0.397379	0.780908	0.656427	0.437169	2.49998	1.72753	2.39191	1.44976	0	0	11.7573	12.8044	1.55839
b0523	4.73749	1.25021	1.22843	0.774458	0.6877	4.8402	3.74833	6.27109	5.21276	0	0	21.5876	41.2917	4.90294
b0524	8.68039	2.63435	2.36336	1.56092	1.51207	5.82001	4.42985	23.4404	21.2515	20.5231	22.2899	19.3849	40.4123	4.49177
b0525	26.8136	12.8253	7.60456	7.39686	3.89229	37.4004	11.7346	183.413	183.706	148.583	86.0662	377.782	80.6925	10.4062
b0526	1.80714	2.95679	1.12462	1.38848	0.996842	5.74667	3.2171	10.9082	11.185	2.13632	0	27.8074	14.8673	2.2443
b0527	3.01899	0.597529	1.36994	0.863672	1.53384	2.02416	2.68722	4.79554	4.98279	0	0	1.08008	0	0
b0528	347.788	214.154	285.574	123.184	159.87	288.704	490.723	349.883	382.678	228.41	0	240.118	308.058	159.971
b0529	7.31995	2.89758	3.36474	2.12129	2.36664	4.90786	6.87093	7.9278	7.59667	3.93332	0	34.8337	5.51709	2.75476
b0530	1.40131	0.184901	0	0	0	0.134221	0	1.11296	1.34915	0	0	0.474947	0	0
b0531	0	0.122293	0.120162	0	0	0	0.219992	0.588888	0.509902	0	0	0.0349033	0	0
b0532	0.348838	0.0920577	0.158294	0.0570261	0.139254	0.100238	0.0828009	0.443292	0.359844	0	0	0.321855	0	0
b0533	0	0.147618	0.0725231	0	0	0.0535785	0	0.888547	0.23081	0	0	0.0421312	0	0
b0534	0	0	0	0.25233	0	0.295689	0.183189	2.94223	0.849197	0	0	0.290642	0	0
b0535	1.07202	0	0.138987	0.175247	0	0.205361	0.254456	2.384	0.294891	0	0	0.444083	0	0
b0536	0	0	0	0	0	0	0	0	0	0	0	15.421	0	0
b0537	0.89843	7.05354	6.52295	1.76244	2.80397	3.91545	4.79819	19.7656	15.5081	5.31042	0	9.67654	0	0
b0539	0	0	6.20781	0	1.15842	1.52873	1.8942	12.6763	4.39041	0	0	3.57053	0	0
b0540	23.9985	5.27763	10.3713	3.92314	2.32243	6.1297	0.949389	19.0603	24.2056	0	0	18.0752	2.55085	0
b0541	2.6618	2.37075	0.862754	1.46858	1.35236	3.50562	2.05338	9.19624	10.0679	0	0	1.30313	1.27318	1.37738
b0542	21.6914	11.4486	23.4357	6.50098	10.4958	11.0808	12.0137	21.8221	18.8951	0	0	14.7038	2.30562	0
b0543	14.8335	24.7921	14.1032	10.9121	3.94763	21.7855	8.80229	46.3395	34.6835	0	0	20.4826	1.57669	0
b0544	0.321521	0	0.0833703	0.0262802	0	0.123184	0.152634	0.510723	0.972886	0	0	0.121082	0	0
b0545	1.35954	0.538172	0.528794	0.555627	0.690736	0.911544	0.968112	1.07979	1.30894	0	0	1.07518	0	0
b0546	0.749238	0.692028	0.67997	0.183722	0.10876	0.287056	1.3338	1.30915	1.54576	0	0	2.7087	0	0
b0547	0	0.26299	0.258407	0.162912	0	0.190906	0.473091	3.16599	0	0	0	0.450354	0	0
b0548	0	0	0	0	0	0	0	20.5448	0	0	0	4.87074	0	0
b0549	0	0	2.43943	0	0	0	0	0	0	0	0	0.354287	0	0
b0550	0	0	0	0	0	0	0	1.15432	0.999497	0	0	0.273667	0	0
b0551	0	0.404298	0.397253	0.500893	0	0.293482	0.727288	5.84054	4.2143	0	0	0.346168	0	0
b0552	32.6539	6.71019	10.8268	3.54413	6.68273	23.1243	29.2878	45.4069	37.8441	37.9691	27.4918	43.4029	32.4325	27.1462
b0553	7.26266	8.30527	13.8102	4.43243	7.73122	31.9529	50.8544	43.9923	39.4902	11.4475	24.8658	269.002	46.4721	4.50978
b0554	0	24.4058	28.7766	9.07105	2.68496	38.9758	21.9517	99.8945	50.8799	0	0	39.0072	0	0
b0555	0	4.36903	4.50754	1.75919	1.44195	5.39155	6.48401	4.47068	7.28666	0	0	6.11005	0	0
b0556	11.6203	39.3542	6.27735	16.6216	3.37362	86.6299	9.19402	49.8374	49.5458	22.8949	49.7317	2.40685	2.47028	0
b0557	17.8026	204.367	12.6946	82.2153	6.46063	482.567	25.354	261.579	270.568	157.841	228.572	976.819	82.3141	27.6366
b0558	0	3.36497	1.65317	2.50135	0.555286	3.66397	4.53991	7.2916	4.91057	15.0737	130.97	4.60984	0	0
b0559	1009.01	33.2844	16.3522	20.6184	9.15431	72.4841	14.9688	160.277	196.604	11182.5	16193.6	148.827	0	0
b0560	0	0	0	0.113378	0	0	0.493868	0.881342	0	0	0	1.56711	0	0
b0561	0	0.172535	0.169528	0.213757	0.189811	1.00195	0.310371	2.07705	0.539538	0	0	0.411228	0	0
b0562	0	0.936374	0.525747	0.580047	0.73581	1.45654	1.4438	1.12725	1.5338	0	0	0.687207	0	0
b0563	0	21.6993	7.10707	22.4031	0	52.5055	0	26.1226	60.3168	0	0	4.27368	0	0
b0564	0.821165	3.25056	4.25855	0.872556	1.72842	4.7192	7.69908	13.8265	12.5367	0	0	9.77209	0.523699	0
b0565	5.24892	8.54195	3.327	2.90788	1.56621	23.8529	7.68302	52.8981	45.2414	27.578	0	199.537	29.7556	4.22507
b0566	0	1.58719	1.03969	0.262186	0.291019	1.45939	1.61793	2.54763	1.65444	0	0	0.332195	0	0
b0567	0	1.77487	1.32872	0.994754	1.11577	1.71786	1.52038	2.54366	1.23339	3.78605	0	2.09861	1.02125	4.64033
b0568	0.603133	1.23353	0.508274	0.554606	0.536253	1.05429	0.966335	1.89215	1.43097	1.78249	0	2.40194	1.5386	1.56049
b0569	0.619591	0.981053	0.562309	0.388268	0.299802	1.81994	1.12752	2.78855	2.49975	1.22076	0	1.23666	2.1733	0.64123
b0570	1.37664	0.272469	0.490822	0.225045	0.249793	1.05486	1.30705	1.42138	1.8461	0	0	3.16242	0.109744	0
b0571	7.56834	3.49522	6.50067	1.85584	3.29589	3.8058	6.06297	3.45632	2.34214	11.1837	0	2.20888	0	0
b0572	0	0.192797	0.473594	0.0895725	0.159076	0.244917	0.346821	0.522219	0.30145	0	0	0.110051	0	0
b0573	0	0	0.641055	0	0	1.42079	2.34728	0.785416	2.04021	0	0	1.11724	6.30674	0
b0574	0	1.11244	0.929099	0.447924	0.458937	0.242258	0.450262	0.669603	0.463832	0	0	0.285748	0.537679	0
b0575	0.141874	0.187201	0.42306	0.208734	0.195648	0.326137	0.353592	0.540865	0.40978	0	0	0.186999	0.13572	0
b0576	1.82157	7.01836	3.5425	4.49648	1.79807	4.50145	3.93459	3.87728	3.20691	0	0	2.4284	1.16171	0.377038
b0577	2.46843	1.30283	1.6535	0.706169	0.776361	5.00449	3.7596	3.2675	4.86629	2.43172	0	12.0537	0.262374	0.425773
b0578	3.04888	7.91183	2.50348	3.40583	1.54903	21.0261	3.01537	38.9056	36.9022	36.0425	0	30.0058	4.86107	2.10357
b0579	0	9.56046	3.13129	2.82016	3.00507	7.60094	2.86637	10.9612	8.54192	0	0	10.2648	2.20042	3.57077
b0580	21.3079	11.2462	5.52514	0	3.09308	24.4911	15.1731	91.3863	58.6139	0	0	10.4317	0	0
b0581	0	0.0623429	0	0.0772378	0.0342927	0.0905101	0.28037	1.05071	0.779815	0	0	3.09599	0	0
b0582	44.7216	7.59593	8.32713	3.46098	5.42138	16.1317	16.8827	19.0443	20.7433	25.3091	12.2168	13.0971	113.782	19.2027
b0583	0	0.146027	0.717411	0.0904578	0.321297	0.848014	1.31343	3.34007	1.82657	0	0	0.708509	1.05869	0
b0584	0.206219	0.734681	1.01598	0.505673	0.733408	0.908601	1.98242	0.949955	0.538905	0	0	0.893093	0.986375	0
b0585	0	0	0	0	0.06254	0	0.0511315	0.684358	0.296283	0	0	0.159039	1.23644	0
b0586	0	0.283409	0.263815	0.147841	0.147689	0.140762	0.268328	0.502792	0.606386	0	0	1.03876	0.288381	0.584969
b0587	0	0.061285	0	0	0	0.0889743	0.110245	0.368888	0.383291	0	0	0.227385	0	0
b0588	0.725411	0.287152	0.0940493	0.296465	0	0.41689	0.430462	0.691371	0.897958	4.28774	0	0.191228	1.85053	1.50149
b0589	0	0.583321	0.214934	0.406512	0.521405	0.476366	0.524666	0.790005	1.44409	0	0	0.0624313	2.46696	1.1438
b0590	0.543818	0.717562	0.141012	0.13335	0.276294	0.572971	0.258163	1.0366	1.49594	0	0	0.389114	2.42775	0.56281
b0591	0	0.865949	0.85086	0.134105	0.416788	0.903609	0.681515	0.325771	0.733397	0	0	0.0617869	1.96191	0
b0592	0.580739	0.38314	0.376463	0	0.168602	0.667496	0.758149	0.276744	0.399375	0	0	0.503012	1.1111	0
b0593	0	0.0585053	0.172458	0.181209	0.128727	0.127408	0.0526224	0.56345	0.54886	0	0	0.183676	22.3392	2.75327
b0594	0	0.159224	0.352011	0.0986329	0.153271	0.346745	0.32223	0.718802	0.497913	0	7.74659	0.2613	15.9688	6.24426
b0595	0	0.267316	0.437763	0.165591	0.0980274	0.388092	0.641162	0.858149	1.39321	0	0	0.813798	27.9938	15.3755
b0596	0	1.74409	2.24924	1.01287	0.899406	1.18692	1.76481	2.23084	2.04525	0	0	1.15111	11.5909	15.3895
b0597	0	2.97307	6.16711	1.63707	2.36222	1.67858	4.75398	1.98839	4.13207	0	0	0.754252	13.5715	36.2738
b0598	3.98194	1.08002	1.00383	0.253145	0.578023	0.995879	1.10269	1.37045	1.24749	0	5.68056	2.22435	3.10382	2.28945
b0599	0.489371	1.93716	2.60132	2.27999	2.73495	2.76552	2.26508	3.18712	2.08655	2.89256	0	2.50638	0	0
b0600	0.450694	0.416281	0.642757	0.221031	0.556098	0.690698	0.748844	1.575	0.929829	2.66395	0	1.15415	0.431147	0
b0601	0	0.712841	1.26076	0.441577	0.705797	1.55237	1.15409	2.05956	1.18888	6.38648	0	2.15656	0.344539	0
b0602	0	0.390558	0.164465	0.103686	0.0613807	0.283508	0	0.671672	0.697898	0	0	0.334403	0	0
b0603	0.628763	0.0829647	0	0	0.091272	0.0602245	0.0746222	1.09864	0.864802	0	0	0.639324	0	0
b0604	1.65224	0.109006	0.749745	0.405149	0.599604	1.74082	0.882404	5.77395	4.0905	9.76604	0	11.7911	0.526861	0
b0605	145.142	53.8309	117.822	28.7503	46.4088	310.229	397.276	251.946	271.747	293.697	235.038	1554.93	69.632	17.5923
b0606	1.87196	1.72902	1.29439	0.816045	0.566116	3.70555	2.22166	5.35235	6.35091	7.37648	0	47.6319	0.696409	0.645778
b0607	34.4064	13.317	4.46078	5.43707	1.33186	21.5308	5.44451	20.0395	19.56	54.2315	0	46.041	8.04566	2.37386
b0608	0.415149	0.328671	0.53824	0.271465	0.723163	0.835045	0.689784	0.461613	1.08489	2.45385	0	0.766073	0.132381	0
b0610	40.8032	184.4	107.125	136.324	50.9012	62.5318	34.8059	38.8885	47.7027	15.0737	0	66.4585	1.6264	0
b0611	0	2.52886	1.81581	1.56653	1.23053	3.53022	1.5747	7.2596	6.59004	4.35702	0	27.4544	2.11548	0.762876
b0612	0.676413	0.44626	0.701574	0.27644	0.540039	0.388731	0.521802	0.752118	0.232585	0	0	0.343887	0	0
b0613	0	0.0861303	0.338518	0.160063	0.379018	0.437657	0.387348	0.933186	0.26934	0	0	0.0491643	0	0
b0614	0	0	0.352529	0.111125	0.0986766	1.17199	0.322704	0.647874	0.93496	8.03596	0	0.563191	0	0
b0615	0.320018	0	0.124471	0.0261573	0.0464541	0.15326	0.11394	0.762502	0.396137	0	0	0.325392	0	0
b0616	0	0.328837	0.161554	0.152776	0.271323	0.238705	0.443657	1.38554	0.342771	0	0	0.281557	0	0
b0617	0	2.22539	3.27992	0.68927	0.612055	0	2.00162	2.67902	4.63937	0	0	0.31757	0	0
b0618	0	0.937532	1.44759	0.248899	0.55254	0.388891	0.963725	1.53173	1.18667	0	0	0.0573381	0	0
b0619	1.1656	2.03785	2.38014	1.048	0.951749	1.53511	3.18169	1.34234	1.32261	0	0	1.20712	0.371682	0
b0620	3.81051	3.39385	3.70524	1.63517	1.24456	3.74105	6.21823	13.1649	8.5166	0	0	3.22876	0.91131	0
b0621	2.53	2.86141	1.78065	1.56573	1.02307	2.70024	1.84447	8.09501	5.26936	8.54529	9.28091	47.3256	1.95926	0.748102
b0622	1.3202	0	0.342328	0.107909	0.287463	0.758713	0.470048	2.93592	2.36055	0	0	4.32543	0.42098	0
b0623	94045.6	2596.78	6828.49	1341.6	2845.1	3661.88	11702.3	12863.2	7942.96	3575.57	5177.84	24659.6	115.738	0
b0624	3.06405	7.68166	3.97253	2.75491	1.11195	9.39143	4.00009	16.0615	14.75	0	0	8.76958	0	0
b0627	700.578	167.549	232.751	82.3159	133.477	159.37	140.308	173.881	192.715	258.81	0	547.45	27.9247	0
b0628	49.8892	5.75052	8.40113	2.81228	3.91233	9.66688	9.80011	21.2236	22.0839	27.1158	29.45	53.8584	4.20569	0.593466
b0629	0.583214	3.23209	2.7977	1.90681	1.22757	3.63101	4.42985	3.42772	3.04818	0	0	1.27387	0.185973	0
b0630	5.23702	2.34947	0.135796	1.02734	0.152042	2.80904	0.994456	7.15416	9.65203	12.3819	0	9.62441	6.67984	1.08398
b0631	191.525	195.855	200.719	122.629	179.555	223.195	189.42	218.032	217.325	94.3386	409.839	178.514	259.559	49.5536
b0632	4.26801	3.5479	1.88138	1.63962	0.991279	5.72321	3.79899	10.3049	9.04015	10.0909	0	33.7371	20.4145	4.85877
b0633	10.7662	27.2494	13.8949	16.0399	6.2158	18.843	10.6285	12.2043	10.9712	8.67769	25.1326	45.2623	9.67502	6.07755
b0634	5.70914	8.16092	2.34393	4.0054	3.34951	9.56963	5.13821	7.85957	7.26344	11.2485	0	7.61462	15.626	8.37042
b0635	4.7222	3.96809	1.61114	2.43776	1.35292	4.33259	2.77268	7.73789	5.74287	14.6904	6.38203	18.8878	10.5406	2.57217
b0636	47.0851	11.4316	5.37203	9.23665	4.51106	33.9147	12.7409	33.5072	26.4225	66.7943	0	46.7411	84.0802	15.5935
b0637	102.294	19.0553	9.36165	22.1326	11.3552	92.7923	24.2806	78.3771	74.4855	213.4	0	114.435	268.627	56.0468
b0638	2.26841	4.1904	1.91164	2.13226	2.7166	3.25911	2.69217	3.78344	5.30396	6.70404	0	11.4044	2.89337	15.2596
b0639	9.42664	2.62587	2.17273	1.4554	1.82451	3.9126	3.85352	7.32054	5.76241	18.5729	0	10.5711	8.01581	35.7715
b0640	5.77546	3.04826	1.4295	1.28746	0.990804	3.97289	2.92868	7.08906	5.70493	9.31021	13.4822	33.9693	80.3631	86.9405
b0641	17.3137	7.34312	3.52742	2.83035	2.15424	18.5972	12.6224	38.1101	33.6788	87.7179	0	53.9778	326.129	263.656
b0642	4.92769	2.20605	1.2093	1.17956	0.536482	4.68616	2.65259	7.3522	6.87438	13.523	0	57.6799	64.9293	38.2484
b0643	7.04863	2.55766	1.37078	0.864202	0.255797	2.36297	1.04567	8.39734	8.48286	0	0	23.4919	1.12382	0
b0644	0	0.744175	0.365604	0.184395	0.245607	0.648241	1.00402	2.15009	2.01684	0	0	0.318589	0	0
b0645	0	0	0.116227	0	0.0650662	0.42933	0.212787	0.996802	0.493202	0	0	0.202561	0	0
b0646	0	0.137969	0.225942	0.142444	0.177082	0.23369	0.165461	0.664374	0.958771	0	0	0.118132	0	0
b0647	0	0.177626	0.174531	0.220065	0.293118	0.25788	0.479295	1.49684	1.66637	0	0	0.202782	0	0
b0648	0	0.354864	0.348681	0	0.260265	0.343464	0.212787	1.1392	0.863103	0	0	0.270081	0.571724	0
b0649	0.341583	0.315501	0.310003	0.16752	0.198338	0.261741	0.243236	0.759626	0.986609	0	0	0.630321	0.217845	0
b0650	0.288939	0.381252	0.486992	0.118085	0.104857	0.221403	0.411499	0.917936	0.834556	0	7.4195	2.87263	2.48766	0.29903
b0651	2.39407	1.5005	0.465585	0.782737	0.260644	1.54784	0.355163	3.61273	4.03369	0	0	152.435	13.1688	0.619419
b0652	0	0.68289	0.111832	0.0705039	0.250423	1.40452	1.12607	1.37015	2.37276	0	0	5.16488	0.550104	0.892693
b0653	0	0	0	0.157929	0.0701184	1.29547	1.03189	1.53457	3.05611	0	0	2.54671	1.23223	0.999816
b0654	0	0.220676	0.867323	0.4101	0.182079	1.6019	0.496215	1.72678	3.4504	0	0	2.04693	1.86655	1.73084
b0655	6.23039	0.904303	0.807768	0.305552	0.271323	2.14834	1.10914	2.77108	2.05663	0	0	9.05674	5.56282	0
b0656	24.6242	7.20462	10.8268	3.93792	6.79929	22.7653	30.0502	46.4273	37.8441	41.1332	41.2377	44.6326	34.8223	24.3762
b0657	8.28173	4.62324	1.15632	3.48877	1.98823	2.50177	1.89016	4.45252	4.81914	3.76549	0	15.6421	35.0419	9.88957
b0658	7.83305	1.46421	1.01555	1.01373	0.852791	2.68847	1.62686	4.87331	4.66856	11.5749	0	83.0139	88.0464	23.6443
b0659	18.8341	3.7277	3.90693	1.69339	1.64038	5.95311	7.59983	5.08591	8.54845	44.5296	0	37.6624	111.707	68.2214
b0660	3.63347	1.84924	2.01891	0.466698	0.640462	2.63503	2.71055	3.21562	2.85571	9.20428	0	52.2312	30.9519	15.5787
b0661	3.49432	2.25925	1.54033	0.999655	0.583325	6.52655	3.06885	7.04924	5.57507	10.3271	0	15.4358	4.01131	2.53145
b0662	3.10376	3.2763	1.09223	3.37048	0.611454	2.97286	1.57867	5.00062	5.30565	2.6208	0	2.08722	3.3933	1.37664
b0664	0	0	0	0	0	0	0	0	0	0	0	4314.42	88.1352	858.139
b0665	0	0	0	0	0	0	0	0	0	0	0	3861.64	88.1352	858.139
b0666	0	0	0	0	0	0	0	0	0	0	0	3279.54	261.153	847.583
b0668	0	0	0	0	0	0	0	0	0	0	0	4283.19	352.541	858.139
b0670	0	0	0	0	0	0	0	0	0	0	0	4205.13	352.541	858.139
b0672	648.835	5736.07	10464.7	3701.77	8194.15	5966.11	10503.4	11625.7	10762.4	767.023	0	3386.62	248.277	402.897
b0673	0	0	0	0	0	0	0	0	0	0	0	3233.28	304.679	847.583
b0674	1.45082	0.421156	0.376197	0.16602	0.189543	0.778195	0.34437	1.75147	2.35465	1.7151	0	14.5006	4.07116	0
b0675	4.08134	1.9387	0.95246	1.13423	1.06641	5.23834	2.32501	7.77964	8.98157	19.2991	0	29.2336	15.357	5.06865
b0676	5.49698	2.00858	1.09644	1.0023	0.583116	4.17162	2.81028	6.98539	7.96767	7.49803	0	37.1347	19.4162	3.93851
b0677	5.48052	1.80787	1.8948	0.671944	0.729263	2.66844	3.03536	6.09391	4.89965	2.69951	0	23.6318	24.3209	3.78128
b0678	3.72579	1.76981	2.51185	1.03542	1.29802	2.49806	3.62588	3.78769	3.68961	0	19.1345	63.3359	32.7906	5.39828
b0679	1.93557	0.319245	0.439156	0.276864	0.386333	0.950142	1.11986	2.0369	2.4958	7.15045	0	34.7238	8.40943	1.75277
b0680	6.67378	2.10578	0.902874	1.04356	1.13726	2.80706	1.72185	6.82153	5.70702	15.4359	14.9019	11.8234	52.2774	1.80179
b0681	0.709736	0.93649	1.6103	0.493101	1.08177	1.18966	1.5583	2.48025	1.80592	6.29264	0	2.69953	0.226318	0.367262
b0682	10.6531	11.2454	14.5024	15.2382	11.5982	13.7752	17.0684	10.9993	19.7807	0	0	5.21544	3.39703	0
b0683	66.6936	11.8252	16.7532	4.08851	5.59701	27.9479	38.3395	33.7684	32.9657	86.2336	0	358.22	30.5713	2.15696
b0684	13.1503	10.0254	3.59931	3.5829	2.22707	20.713	5.20231	38.2961	39.3894	17.273	0	108.785	26.5577	3.02435
b0685	80.1119	17.6178	9.23244	7.27569	7.75276	11.9363	10.5642	25.4509	26.9344	52.6137	0	99.5591	45.4147	0
b0686	0	1.89353	0.930267	1.30329	1.27302	1.06907	0.662327	3.79918	3.28961	4.71235	0	8.46666	1.52534	0.825091
b0687	16.6452	8.78529	6.29432	3.85485	2.31557	17.2718	12.6759	23.5759	23.657	0	0	136.913	77.4049	2.87109
b0688	7.96961	2.25895	1.64556	1.97837	1.11403	4.24083	3.1528	8.81469	7.26701	10.4681	0	49.6879	16.3774	1.22192
b0689	0	0	0.65182	0	0.243268	0.963101	0.596673	6.65503	2.07447	0	0	5.30131	4.80948	0
b0691	0	0.135102	0.265496	0	0	0.0980714	0.121517	1.46378	0.563308	0	0	0.192795	0.326496	0
b0692	0	0.253159	0.746242	0.376372	0.334209	0.698323	1.00189	0.91429	0.738881	0	0	0.578025	0.611798	0
b0693	0	0.194578	0.163875	0.086095	0.183481	0.262312	0.350024	0.568871	0.43462	0	0	0.174534	0.134351	0
b0694	0	0.253159	0.124374	0.392054	0.348135	0.643193	1.02466	0.609527	1.31943	0	0	3.03463	6.11798	0
b0695	1.0117	1.57967	1.63959	1.03367	0.930113	1.4374	1.74101	0.991013	1.36831	2.98997	0	1.33349	2.90347	0
b0696	3.81346	3.35455	5.60336	1.97411	3.7827	3.53087	5.28016	2.82684	2.62252	0	0	1.24463	19.4563	0
b0697	0	0.060229	0.0887692	0.0746189	0.0662597	0.153022	0.108345	0.290025	0.376687	0	0	0.249251	0.0727765	0
b0698	0	0.114135	0.149528	0.0471346	0.0209272	0.055234	0.0342193	0.412201	0.475884	0	0	0.0651496	0	0
b0699	84.0841	22.1896	10.9015	17.182	6.10287	44.2958	0	113.529	57.8247	0	0	235.906	26.8124	0
b0700	0.936928	0.989013	0.917792	0.536073	0.921815	0.678045	1.03782	1.57095	1.2457	0	0	0.780165	0.298764	0
b0702	0	0	0	0	0	0	0.632162	5.92272	3.66309	0	0	2.20653	0	5.51259
b0703	0	0.777864	0.944147	0.453511	0.679568	0.597871	0.617335	1.3771	1.14469	0	0	0.34063	0.221157	0
b0704	0	0.3386	0.16635	0	0	0.122896	0.304552	1.22286	0.529421	0	0	0.483193	0	0
b0705	0	0.266877	0.0655566	0.247979	0	0.290591	0.120021	0.722874	1.39093	0	0	0.209184	0	0
b0706	0	0.42325	0.207937	0.131093	0.0582038	0	0	0.764289	1.21326	0	0	0.0905986	0	0
b0707	0	0.625107	0.409476	0	0.458466	0.302513	0.56225	0.501687	1.73759	0	0	11.5966	2.01423	0
b0708	1.75613	0.60247	0.546436	0.0861245	0.35689	0.605543	0.958727	1.1716	1.256	0	0	3.00249	0.447989	0
b0709	0	0.791532	1.25302	0.544803	0.411206	0.351131	0.593283	1.32344	1.42096	5.90956	0	0.715376	0.31881	0
b0710	2.49342	5.92207	5.06458	2.85327	4.34337	9.55303	5.22794	6.20508	6.51595	0	0	5.16449	34.4539	16.3431
b0711	3.02641	3.06154	2.8774	1.64913	1.31795	9.46931	6.22573	7.37123	7.9088	11.9256	0	8.88979	44.0705	25.0568
b0712	1.20229	1.42777	1.87052	1.81803	1.13442	3.3396	3.06782	4.01056	6.28381	7.10647	0	15.6885	26.07	15.5535
b0713	2.53969	1.56384	1.53659	0.761151	1.10599	3.56778	4.62166	6.58917	6.28756	10.0077	0	7.58762	30.2342	21.9032
b0714	0	1.19947	1.47321	0.928778	0.76975	2.17675	2.33752	4.45224	6.56404	8.95521	0	8.38722	15.2182	14.8958
b0715	1.03032	3.67064	1.20223	2.23171	1.1965	3.10863	1.40621	8.10127	8.50262	15.225	0	8.6138	0.492816	0
b0716	0	0.667191	0.917792	0.537288	0.770698	0.387454	0.960164	1.20479	0.695463	0	0	0.228505	0	0
b0717	0.857166	0.339307	0.555657	0.210187	0.124427	0.246305	0.508646	0.816944	0.707369	5.06652	0	0.645602	0	0
b0718	0.186798	0.147887	0.0242183	0.0458051	0.0542317	0.125244	0.133016	0.207705	0.128461	0	0	0.140693	0	0
b0719	0	0.85451	0.503772	0.105867	0.188015	0.248118	0.307434	1.44017	0.356288	0	0	0.0975531	0.413012	0
b0720	7.14747	2.61973	1.44148	4.47897	1.15282	2.01577	1.03677	1.70302	3.49534	4.69412	0	25.3167	3.54535	1.6438
b0721	137.838	0.386971	0	0.239713	0	0.280904	1.04418	1.86341	2.01684	0	0	7.17886	735.049	242.812
b0722	62.8417	0.552793	0	0	0	1.20383	1.98883	4.65833	2.30487	49.5258	0	3.47096	1068.73	537.634
b0723	6.4957	0.14285	0.210542	0.0221225	0.117865	0.518479	0.546066	0.816854	1.11678	1.59978	0	4.02607	70.7702	39.7751
b0724	14.9463	0.464034	0.683922	0.431176	0.446686	1.34738	1.98252	2.79312	4.35327	5.1967	0	20.2962	201.854	129.205
b0726	2.09153	1.01898	0.730062	0.381362	0.420381	0.446893	0.496448	1.89116	1.43834	2.85289	0	18.1826	5.28419	63.1055
b0727	4.66571	0.391768	0.384942	0.138677	0.215498	0.85316	1.05712	2.35814	2.04184	5.01418	0	45.9392	12.7138	173.393
b0728	4.02971	0.649875	0.348301	0.256182	0.162488	0.943496	1.32847	1.42245	1.66274	5.29305	0	40.721	5.56823	64.4102
b0729	6.6223	1.39809	1.97473	1.08258	0.769041	2.91778	2.82939	3.36616	3.279	3.91429	0	73.9939	5.70157	69.9065
b0730	2.60412	0.572684	0	0.141902	0.252011	0.415715	0.206039	2.48192	2.02963	0	0	6.37446	0.83039	0
b0731	0	0	0.246587	0.0194325	0.0862777	0.0227716	0.112862	0.0755291	0.326992	0	0	0.0716255	0	0
b0732	0.172224	0.204523	0.200959	0.0703856	0.187502	0.362914	0.286156	0.410357	0.521131	0	0	1.47228	0	0
b0733	22.7237	29.6551	19.6542	13.8412	8.83391	49.8217	27.4489	18.3939	21.2785	27.5989	0	236.446	186.312	120.164
b0734	49.8235	2.43487	3.05037	3.24286	2.81261	8.74907	6.67961	13.5568	13.1979	79.0775	11.8462	185.685	261.703	176.175
b0735	347.152	23.4904	12.6946	13.0962	10.337	44.3347	21.1284	73.5248	83.2517	315.682	228.572	409.634	3562.21	2911.05
b0736	18.5424	14.3304	16.4847	2.8147	9.03623	26.8943	24.207	44.6016	42.2626	15.6572	68.0201	45.3889	124.167	5.48286
b0737	11.1219	2.69045	3.96536	1.28785	1.68173	7.90083	8.24972	12.8083	13.7673	16.4347	0	29.4584	44.6268	3.83677
b0738	22.9376	2.72393	5.9477	4.12467	2.8302	16.0382	11.4335	21.1325	23.6613	0	0	22.7181	90.6965	9.49546
b0739	4.44528	1.91962	1.46702	0.99094	1.11458	4.52876	2.39805	7.51049	8.11501	7.16593	10.3771	10.6987	21.1335	17.5657
b0740	5.11752	2.70101	3.8278	2.22016	2.65717	7.99352	8.82996	10.1299	12.6154	25.5949	30.3253	32.4957	32.7626	57.4439
b0741	24.1519	13.3448	8.21964	8.01982	6.13536	57.5441	22.3935	55.3885	83.8769	160.601	155.046	177.531	99.1563	212.461
b0742	15.9082	5.59751	3.33927	4.27238	2.41921	20.0261	9.43999	23.9458	33.9663	40.2984	19.4522	59.6235	46.1377	104.27
b0743	0	0	0	0	0	0	0	0	0	0	0	382.676	3634.37	8242.63
b0744	0	0	0	0	0	0	0	0	0	0	0	3252.74	6174.05	8668.97
b0745	0	0	0	0	0	0	0	0	0	0	0	387.847	4159.82	8384.74
b0746	0	0	0	0	0	0	0	0	0	0	0	3330.31	6042.69	9095.31
b0747	0	0	0	0	0	0	0	0	0	0	0	470.588	3721.94	7389.94
b0748	0	0	0	0	0	0	0	0	0	0	0	403.361	4028.46	6821.49
b0749	0	0	0	0	0	0	0	0	0	0	0	444.731	4466.33	7389.94
b0750	1.03421	0.204695	0.402256	0.1268	0.150128	0.297179	0.245483	0.492841	0.568983	0	0	2.18106	2.80318	0
b0751	1.74716	0.691608	0.339778	0.35702	0.38043	0.836737	1.24413	1.52641	2.28289	0	0	2.82925	4.45702	0
b0752	0.593327	0.548023	0.692323	0.436472	0.645961	0.681965	0.63375	2.54469	1.79534	7.01405	0	2.74833	0.378395	0
b0753	0	0.827114	1.21905	0.512364	1.3649	1.20081	1.11592	5.47643	3.01757	0	0	4.48521	0	0
b0754	6.13573	3.84561	1.19324	1.96427	1.44734	7.10132	3.03414	11.8581	10.7598	9.06673	0	39.2234	1.79349	0
b0755	7.34641	1.9387	1.26995	0.800632	0.770187	3.75284	4.06877	12.7067	9.20611	4.82477	0	87.1168	13.535	5.91342
b0756	10.3814	6.30112	17.228	4.073	8.36368	17.7492	41.2743	13.1923	11.7798	3.06809	0	76.353	9.60005	6.44635
b0757	6.39394	6.14677	15.2176	4.29297	7.49152	14.3921	33.1721	9.57614	8.04045	0	0	42.2071	18.3499	7.56257
b0758	2.5758	0.339874	0.267161	0.126323	0.112172	0.88818	1.89533	2.29127	3.4719	0	0	41.0126	30.7189	7.99727
b0759	1.60593	0.353168	0.555222	0.131264	0.194265	0.92292	1.27062	2.38089	2.2088	0	0	47.8984	32.6032	6.64806
b0760	0	0.620166	0.478783	0.493931	0.414232	1.80073	1.31483	3.46628	2.7243	1.98435	0	7.92704	2.89041	1.04233
b0761	1.5235	1.90973	2.07397	1.12074	1.32692	5.03439	4.15863	9.07505	6.28626	13.5076	19.5605	15.749	5.10097	1.5767
b0762	237.881	94.1644	10.2804	32.4062	11.5104	174.684	65.8745	957.256	937.921	1406.06	0	310.557	101.139	0
b0763	2.35066	1.96439	0.609526	0.57641	0.341225	4.05274	1.02292	5.2275	4.95743	9.26283	20.1204	8.43927	16.2407	0
b0764	6.53199	3.81694	1.69374	2.13563	1.49002	4.64769	2.54716	6.67016	5.26213	0	0	3.8304	20.5314	0
b0765	2.53759	1.94203	0.921195	0.954112	0.73672	3.06252	2.10815	4.35333	3.90904	0	0	2.58021	8.09177	0
b0766	1.44317	2.2851	1.12264	0.589804	0.576105	4.9763	2.56916	4.81408	6.64956	4.26513	0	10.6795	1.38058	0
b0767	8.25568	1.59768	1.92662	0.809755	1.31824	2.58312	2.54746	8.56769	8.25121	22.7722	0	19.5246	1.57952	1.7088
b0768	0	0.307818	0.453681	0.286021	0.16932	0.391032	0.415298	1.5749	1.52409	0	0	0.19767	0	0
b0769	0	0.0674669	0.464039	0	0.0371112	0.244873	0.121366	0.243659	0.140652	0	0	0.038511	0	0
b0770	0	0.228784	0.0899188	0.0283445	0.0503384	0.13286	0.0823114	0.330503	0.190782	0	0	0.117533	0	0
b0771	0.204067	0.646234	0.582059	0.300237	0.414716	0.645019	0.605471	1.52351	0.813954	0	0	0.414988	0	0.211194
b0772	3.57374	1.46705	0.308889	0.876321	0.288204	2.81448	1.55516	6.55978	5.13378	9.38824	10.1964	21.5782	14.8145	1.23285
b0773	0	1.67062	2.81402	1.18273	1.83791	2.59868	3.00527	9.48123	10.6973	0	0	16.8245	4.61409	0
b0774	0.394791	0.0520923	0.204738	0.0322691	0.200579	0.264698	0.374833	0.501687	0.597296	0	0	0.862313	0.755336	0
b0775	0	0.547924	0.134594	0.0424271	0.0753485	0.497176	0.18481	0.412259	0.499749	0	0	1.07512	2.31725	0
b0776	0	1.85575	0.647018	1.14956	0.362214	0.651823	0.807652	0.576525	1.12319	0	11.6498	0.495473	2.02536	0
b0777	0	0.535335	0.526007	0	0.0588939	0.233162	0.577806	0.773352	1.89727	0	0	0.427807	3.88117	0
b0778	0	0.126579	0.373121	0.313643	0.0696269	0.367539	0.569256	0.761908	0.263886	0	0	1.01154	3.97669	0
b0779	0.695117	0.519747	0.360487	0.416657	0.269077	1.15405	0.852471	2.17152	2.00774	1.36956	5.94984	6.99811	0.738854	0.239798
b0780	5.60735	2.95954	2.4233	1.83331	1.5375	6.20633	3.99291	6.6308	8.14082	11.0479	15.9987	9.73717	2.38406	0
b0781	6.10325	2.85522	2.8774	0.997725	1.04704	3.24179	4.60944	44.8603	38.9196	45.9136	0	43.9209	63.5162	5.74219
b0782	14.0504	3.29587	5.06007	1.91406	2.03957	12.8597	8.89338	33.7256	34.1406	36.9104	0	40.5073	138.89	11.3097
b0783	13.9181	3.9025	6.31565	1.70643	1.89409	16.1639	10.3238	40.6239	37.0894	41.1332	44.6742	37.3451	136.473	14.4041
b0784	157.656	47.5488	52.5603	40.5001	37.5978	202.781	125.63	415	384.118	266.249	0	101.781	1062.91	139.854
b0785	24.2709	6.93879	6.55566	3.14107	4.69759	21.31	12.7222	50.4406	41.4496	11.955	51.9365	54.2318	47.7263	8.37284
b0786	0.902379	1.30975	1.16993	0.737579	0.916933	2.33367	1.28514	10.6071	9.3085	21.335	0	22.4966	7.76917	0.933894
b0787	0	0.116758	0.229448	0.0723273	0	0.254267	0.52509	0.702795	1.33877	0	0	1.23297	0	0
b0788	0	0.229884	0.602341	0.047468	0.295053	0.222499	0.344613	0.553488	0.239625	0	0	0.131221	0	0
b0789	0.413894	0.218451	0.321967	0.169152	0.300406	0.31715	0.196485	0.657453	0.740051	0	10.6281	0.935211	0	0
b0790	0.801919	0.211625	0.415874	0.131093	0.116408	0.0768098	0.475863	1.01905	0.330888	0	0	1.72137	0	0
b0791	12.751	16.4883	9.58836	9.38008	5.73795	18.5641	11.5011	37.2682	29.1127	45.221	0	32.3649	0	0
b0792	0.958186	0.632158	1.24229	0.391597	0.347728	1.239	1.47834	2.81577	3.42651	0	0	5.30441	0	1.48747
b0793	0.46446	0.674135	0.782822	0.493527	0.202265	0.978717	1.15757	2.9511	2.74692	0	0	3.91801	0.59242	4.80681
b0794	0.828344	1.27516	0.859157	1.60239	0.561136	1.24301	1.11416	2.14912	2.35457	3.2641	0	5.82301	1.58483	3.42909
b0795	0	1.44662	0.355353	0.672093	0.318294	1.78519	0.91081	3.39593	2.71426	9.72041	0	5.53252	3.49599	6.80782
b0796	3.89178	0.385137	0.378426	0.159051	0.423701	1.67744	0.69282	5.10009	3.61311	11.5017	0	7.76772	4.96398	0
b0797	8.46941	1.11753	1.19354	0.842758	0.534535	2.04569	2.40364	6.90214	7.59708	0	9.45571	18.5269	1.17421	0
b0798	1.76216	0.930059	0.456926	0.144034	0.383695	1.0127	2.50961	4.47858	2.18131	10.4157	0	5.57434	0.561909	0
b0799	1.07991	0.85496	0.980072	0.564921	0.564341	1.05505	1.10222	2.57309	2.13885	2.55325	0	6.88924	0.826459	0
b0800	4.60682	1.59564	1.04523	1.41206	0.417957	2.64751	1.16183	4.66506	4.59376	0	0	11.5153	2.38713	0.595963
b0801	1.47338	0.453626	0.318373	0.12043	0.605987	0.799704	0.582875	0.858149	1.14835	0	0	7.87904	2.19252	0.50828
b0802	16.9312	53.6174	81.2199	24.9104	39.3241	72.9772	176.829	86.0626	69.8618	0	0	40.8074	0	0
b0803	0	25.799	27.2994	13.5228	18.5577	10.0841	12.4949	16.7235	18.6177	0	0	9.0624	201.43	15.5655
b0804	0.959305	1.01263	0.994989	0.627287	0.557015	1.65392	1.36621	1.98096	2.11109	0	0	0.433519	21.4129	0
b0805	0.201959	0.213186	0.209471	0.115553	0.278508	0.541636	0.71906	0.609527	0.527772	0	0	0.197745	11.3344	0
b0806	0	2.23406	10.9757	4.15173	6.1444	3.24343	12.0565	5.37891	9.3149	0	0	26.7798	0	0
b0807	5.45826	5.12151	4.71775	2.67686	2.9052	7.49355	9.28501	3.85343	2.83609	3.58473	31.1466	6.71474	1.35373	0
b0808	0.415569	1.23376	1.32002	0.543479	1.01044	1.33344	2.04679	0.990172	0.800205	0	0	0.657298	0	0
b0809	49.4782	4.46694	3.8264	2.48329	2.07909	15.2983	14.4228	15.8567	18.0279	15.3924	22.2899	20.0714	0	0.898355
b0810	36.0511	4.09623	7.6602	3.51969	2.47125	15.8266	20.7987	12.8848	14.7377	11.8383	0	16.7444	0	0
b0811	55.3502	8.93849	17.8868	3.98397	10.3732	25.7957	36.7668	16.9282	17.271	14.6491	21.2135	59.5153	0	0
b0812	3.23293	19.1962	8.80213	8.58815	6.10085	33.2883	11.5106	21.5686	24.6785	28.6637	0	268.031	3.60816	0
b0813	2.57418	1.61339	0.417178	2.41968	1.21443	0.739686	0.0763767	2.04449	2.47838	7.60772	0	0.945179	0.820845	0.666022
b0814	429.105	200.003	468.881	117.459	170.176	1269.1	1590.08	916.503	777.228	921.477	515.265	435.208	172.27	11.1822
b0815	1.53891	1.0559	1.47645	0.503146	1.0276	3.09542	4.38336	4.54678	3.80993	1.81924	0	2.43407	0.196289	0
b0817	1.88341	5.21878	0.488366	1.23155	0.546795	3.60795	0.447049	9.27431	9.32558	0	0	9.78797	7.80744	0
b0818	2.36238	1.37154	0.18377	0.308951	0.240049	0.950356	0.616814	2.10143	1.88455	0	0	1.17434	1.9586	0
b0819	6.11896	2.2607	1.66598	1.75051	1.51	4.27846	2.32385	6.41502	7.40611	14.4671	15.7125	29.3804	3.90238	0.633266
b0820	4.28009	1.97664	2.25929	0.97456	0.732249	3.80675	3.12035	4.07924	3.44801	12.6493	0	28.7599	9.84617	0.949192
b0821	1.21235	0.373259	0.157181	0.132125	0.205317	0.348366	0.52757	1.15546	0.833734	0	0	0.486997	0.128863	0
b0822	2.90164	8.71027	3.38578	5.21779	1.05301	5.41957	2.75496	3.57208	4.39002	0	0	9.94386	0.462632	0
b0823	1.12849	0.421892	0.487695	0.215226	0.559695	0.270224	0.580365	0.806652	0.801933	0	0	0.991618	0.0599747	0.19465
b0824	0	0.166695	0.327581	0.309783	0.41262	0.24201	0.2249	0.40135	0.434397	0	0	0.404395	0	0
b0825	0	1.18059	0.257782	0.243776	0.793713	3.33277	1.88778	4.26373	5.4694	0	25.5281	2.43351	1.58505	0
b0826	3.28466	4.33408	3.8327	2.48343	2.74163	9.20243	8.0889	12.9134	12.3108	14.5612	0	23.5025	104.216	8.49843
b0827	2.91489	1.31868	0.809816	0.340364	0.513799	2.3931	1.53203	5.15934	2.92094	9.84528	0	13.4079	55.1053	4.30955
b0828	2.29376	1.21064	0.817809	0.468713	0.208103	1.70269	1.0889	1.91286	2.36613	3.38947	0	10.1929	24.6855	1.7804
b0829	0.7594	0.267206	0.49228	0.248285	0.477687	0.80011	1.17164	1.3269	1.56672	1.49622	0	4.76639	10.7355	2.35777
b0830	0.318528	0.378265	0.619456	0.260356	0.323665	0.640698	0.567048	2.22626	1.84004	0	0	3.56265	5.48483	2.96687
b0831	1.83569	0.242217	0.951987	0.400117	0.222059	0.468872	0.726205	1.84675	1.76737	0	0	2.05087	0.390238	2.53307
b0832	0.620215	1.22755	0.402054	0.456252	0.585203	0.891087	0.956901	2.56148	1.53548	0	0	2.89624	0.197772	1.28375
b0833	0	0.438776	0.304327	0.255816	0.0851843	0.693228	0.27858	1.39822	0.99545	0	0	5.3112	0.498999	0.20244
b0834	0	0.552303	0.345342	0.373233	0.110474	1.12987	0.180643	2.0551	1.88413	2.24918	0	6.16194	0	0
b0835	1.14475	1.15804	0.296832	0.343084	0.0830864	1.7909	0.815158	2.00022	1.88938	6.76634	0	9.95844	0.730064	0.394909
b0836	6.1281	14.959	14.3011	10.5188	5.55976	17.9024	5.81831	22.8754	15.1715	0	0	47.7712	0	0
b0837	0	0.375353	0.122937	0.116258	0.0688229	0.408706	0.675219	0.828421	1.17377	0	0	1.21412	0.151183	0
b0838	3.26723	2.44295	0.564795	1.24625	0.790459	1.77335	1.03402	6.57383	4.79335	0	0	14.3958	1.38912	0
b0839	0.430832	0.397935	0.223429	0.352149	0.34397	0.825323	0.613578	1.36872	1.18513	0	0	7.59317	1.09905	0
b0840	11.293	3.29952	3.03286	2.17579	2.16623	10.4304	7.65868	9.09739	8.6538	9.5358	0	18.1961	3.8583	0
b0841	7.09941	10.1482	10.585	4.35214	5.15279	14.28	11.6555	18.4193	14.4841	0	0	11.942	5.65958	0
b0842	1.67073	2.20451	1.35381	0.785225	0.879155	3.88065	1.78456	2.45485	1.666	4.93766	0	2.62684	0.266378	0.864541
b0843	0	12.5192	5.46711	4.3084	3.0606	47.4581	31.2786	53.5861	37.699	0	0	13.1012	16.8081	10.9103
b0844	0	0.574303	1.22264	0.59293	0.631809	2.08445	1.89403	3.11117	3.29251	0	0	6.31053	1.61921	0.750745
b0845	0.428136	0.451937	0.49957	0.279957	0.403967	0.820159	0.711362	1.36015	1.2366	0	0	2.17663	0.955656	0.443088
b0846	0	0.943832	2.04025	0.7016	0.726837	2.0554	1.1885	4.09041	5.70619	0	0	6.19564	0.912368	1.48056
b0847	1.4296	4.07451	4.48542	2.524	2.78081	2.82078	3.93627	2.49796	3.65728	3.38003	0	8.22639	2.46168	0.295907
b0848	6.41535	9.73474	4.99049	4.45717	2.56097	9.21718	5.32966	23.4382	22.5004	56.8796	0	20.4149	4.0914	0
b0849	17.9521	14.2126	4.65497	2.93471	1.30297	25.7925	14.914	51.3291	32.0988	0	0	39.2115	5.72449	0
b0850	59.724	44.6563	52.9119	21.9675	30.3436	66.7393	80.3318	72.733	80.7754	0	0	44.983	447.547	0
b0851	2.60412	5.2687	6.18976	1.48997	2.96113	10.1434	11.0231	9.23826	11.3421	0	0	11.2452	39.5819	2.69506
b0852	8.80269	10.3706	6.8476	5.60187	4.06161	13.671	13.3574	10.7867	12.4532	14.8659	0	1.04186	27.2677	0.650722
b0853	19.8961	17.8995	10.5526	6.65283	4.46348	42.445	20.6076	36.7757	45.5256	42.7641	0	49.9966	54.2156	1.8719
b0854	0.475762	0.376658	0.616824	0	0.241718	0.318988	0.564639	0.680155	0.458055	0	0	0.250835	0.455127	0
b0855	0	0.49028	0.602171	0.303709	0.235975	0.444871	0.44098	0.59022	0.447173	0	0	0.279858	0.29621	0
b0856	0.583214	0.307818	0.604908	0.0953405	0.16932	0.391032	0.969029	0.741129	0.320861	0	0	0.219633	0.743891	0
b0857	0.688897	0.272698	0.357261	0.112617	0.250003	0.395906	1.14463	0.765999	0.284253	0	0	0.0778297	0.87869	0
b0858	8.58959	3.85352	4.0091	1.68501	2.74313	3.45548	6.52429	6.27634	6.8522	10.1542	0	0.776343	0.547803	0
b0859	2.33817	0.863853	0.666915	0.649792	0.543058	1.97081	2.05347	3.04555	2.57274	0	0	4.4555	0.298234	0
b0860	0.851831	0.786788	0.331319	0.487384	0.0618264	0.571134	0.707673	1.3531	1.17161	0	0	6.54415	0.271628	0
b0861	3.91964	1.81017	2.41386	2.00238	1.84918	4.97449	4.53557	4.66964	4.58242	11.5841	0	18.5989	12.8113	1.01413
b0862	1.75838	2.08815	1.48183	0.790489	0.638123	4.46319	4.17373	5.16727	3.5068	5.1967	0	6.29082	22.1479	0.909897
b0863	0.851831	1.34878	0.883517	0.974767	0.123653	4.16112	2.02192	6.22425	4.45212	5.03498	0	35.0305	23.36	0.88158
b0864	3.42866	1.13102	1.00018	0.700623	0.435495	3.11986	1.62767	3.94856	5.30526	0	0	17.5281	23.233	0.887102
b0865	1.54354	0.203669	1.20072	0.378494	0.560156	1.03491	0.732757	2.20667	4.03369	0	0	32.2613	1.96879	0
b0866	0	16.0807	15.8005	9.96137	6.83512	46.6923	21.0382	42.2371	34.2862	98.2296	0	52.9883	26.4966	11.4661
b0867	2.12005	2.14466	1.83242	1.44406	0.923246	6.70109	3.94188	7.18423	6.9982	16.7082	0	10.4323	3.83085	1.46273
b0868	0	2.97826	1.88123	1.88884	1.44321	3.39733	2.42366	6.23169	5.39585	6.35304	0	8.52038	14.7376	6.11798
b0869	0.695313	1.10095	0.901472	0.852494	0.605595	1.29868	1.23781	1.93283	2.39084	2.05492	0	6.232	15.1877	6.11657
b0870	2.18395	1.36881	1.34496	0.758667	0.435909	2.82399	1.94395	2.34165	3.30419	3.22721	0	13.8789	24.7225	9.04089
b0871	0.279498	0.0368795	0.0724737	0.0228454	0.0608584	0.294481	0.199027	0.177588	0.307538	1.65205	0	7.54688	0.267375	0
b0872	1.71314	1.13024	1.18458	0.560109	0.787491	2.29724	3.38862	3.44692	3.53438	16.8766	0	2.5161	0.910465	0
b0873	0.292646	0.501987	0.303532	0.19136	0.212404	0.840912	1.04195	1.90591	1.16727	5.1893	0	2.38049	0.373271	0
b0874	2.52666	1.08352	1.31032	0.722827	0.733546	1.93608	1.27443	2.00675	2.60638	0	0	2.37879	0	0
b0875	0.920589	0.728824	3.10321	0.978202	1.53679	2.90982	4.37025	1.90101	1.3928	5.44139	0	1.28274	0	0
b0876	1.1656	1.34575	1.05784	0.976546	1.1844	2.48408	1.07209	4.76763	4.96982	5.1672	0	6.82574	1.48673	0.301577
b0877	5.52601	5.39572	1.36125	3.47794	1.52411	11.1152	2.49216	13.5179	15.733	6.5326	28.3798	28.8641	23.2599	0.5719
b0878	0	0.312794	0.122937	0.310022	0.172057	0.772001	0.393878	0.979043	1.76066	2.80238	0	4.92789	1.36065	0.981344
b0879	1.93557	2.26664	1.85073	1.50297	1.05364	1.64537	1.57929	1.30669	1.73042	1.43009	0	1.1936	0.848658	0.500792
b0880	902.804	106.361	133.77	44.8027	58.5054	250.154	229.598	558.262	332.603	190.581	0	1759.44	92.5337	0
b0881	40.385	25.1213	23.1876	20.7488	12.1434	48.0759	47.2446	79.7291	99.1885	34.1009	148.146	104.505	163.732	41.7954
b0882	8.70994	1.63036	1.36559	0.761595	0.676278	3.64746	3.19727	11.0361	9.61159	7.1836	5.20134	31.9236	6.20068	1.46742
b0883	0	4401.27	5925.66	5182.26	6967.27	792.63	1329.64	343.792	910.55	0	0	177.395	0	0
b0884	2688.63	4957.34	5448.87	2680.51	1974.53	9342.02	6528.74	2882.78	2218.77	1672.83	0	5246.42	67.6847	0
b0885	5.41427	2.14322	4.32875	1.77019	4.58466	3.54372	4.81928	5.73357	4.71631	0	0	9.31128	5.75494	8.40505
b0886	1.39464	0.404847	0.325467	0.592769	0.526364	1.46941	0.595863	2.83562	3.06911	1.64868	0	12.4265	9.69484	4.61871
b0887	2.9772	2.21418	1.57906	2.2565	1.8662	2.56647	1.6382	3.22442	3.20142	4.79933	6.94998	9.56065	10.4429	4.48171
b0888	4.01407	2.26994	1.41258	0.656198	0.416206	6.37135	4.90005	14.2098	13.0137	13.5579	0	37.2949	10.9714	1.7804
b0889	58.6546	55.0604	48.8865	28.0807	19.8263	152.491	85.7221	99.0269	104.184	49.5278	0	70.9997	16.566	0
b0890	2.41519	2.36114	1.70798	1.93822	1.3944	3.71184	2.42339	6.22548	7.65537	8.43561	8.45704	27.3482	2.45046	1.70423
b0891	12.4763	2.54417	1.76459	1.94684	1.64643	7.49596	6.192	19.0974	18.2519	13.4081	58.2492	66.8034	3.25504	11.7382
b0892	2.25182	1.13898	0.875845	0.460144	0.844433	2.08496	1.2917	5.42501	4.95546	8.87335	0	17.0875	1.31643	3.4957
b0893	30.7051	11.739	13.8822	6.04914	12.0001	12.8198	19.5754	24.5745	23.1192	41.8826	10.1084	222.104	3.13818	0.814807
b0894	1.12232	1.23408	0.897304	0.840907	1.00466	2.77705	1.90917	3.03069	3.4732	6.63379	0	29.7409	2.86305	0.580759
b0895	6.69428	1.61939	1.44652	0.547171	1.37665	4.0609	4.50207	7.79796	6.59858	6.59473	0	35.7142	9.6059	3.46404
b0896	14.7114	1.67645	1.82064	0.929181	1.74725	4.29134	4.28555	8.39141	6.5301	3.95254	0	11.3574	2.55879	0.692055
b0897	0	0.574811	0.847193	0.267054	0.474276	1.25178	0.90477	3.9789	4.19418	0	0	4.83962	0.347281	0
b0898	3.65368	2.04892	1.06582	2.42646	2.02205	2.58095	0.921448	2.0313	3.01517	0	0	0.997559	2.03887	0.47266
b0899	0	0.550475	0.49581	0.0568329	0.277564	0.59939	0.536383	0.938805	0.765068	0	0	1.59728	0.776015	0.719597
b0900	1.24608	1.23314	0.646215	0.814807	0.497426	1.61126	0.665485	1.78141	3.17064	0	0	2.86249	0.397344	0
b0901	1.20405	0.317747	0.468316	0.196832	0.174782	1.03795	0.428695	4.39896	0.828029	0	0	0.362749	0	0
b0902	9.19839	2.09642	0.867323	1.0936	0.728317	4.48532	1.19092	21.6512	15.2968	4.94269	0	60.5575	0	0
b0903	67.4543	7.38157	4.63456	4.12689	4.36817	19.2087	11.3851	39.2984	35.0552	102.661	31.1159	1486.62	15.134	27.5896
b0904	27.6873	62.73	71.8806	35.5469	52.8368	113.776	111.562	116.923	116.751	103.78	17.3406	140.075	48.4508	79.6728
b0905	5.97804	0.430252	0.598903	0.444207	0.394445	1.7438	0.967472	2.28764	2.65353	3.21226	0	13.4258	18.0227	3.37463
b0906	0.926823	1.22293	1.44195	0.606047	0.538155	1.3316	0.989966	0.73611	0.254951	0	0	3.59504	0	0
b0907	1.95749	8.07151	6.15435	3.07999	3.26773	9.93712	5.51751	14.7696	11.8462	20.2479	0	29.6343	11.5476	1.01292
b0908	0.397082	3.92959	1.75037	3.27809	1.84451	2.81448	2.92181	4.41524	4.0961	2.34706	0	20.995	6.96409	0.821899
b0909	0	0.420784	0.310089	0.521318	0.462918	1.14544	1.0408	1.13976	1.31584	0	0	1.95153	1.27111	0
b0910	36.8957	50.8056	68.5637	22.8114	30.6243	138.096	174.254	54.5498	50.8765	22.3674	72.8787	26.0078	63.3507	4.89541
b0911	161.465	81.9107	93.268	52.8143	52.1296	158.245	194.948	143.675	138.641	235.187	244.328	444.863	58.3829	31.6304
b0912	1054.21	55.6407	166.747	35.3289	79.5757	278.69	470.43	361.706	288.542	436.183	0	692.377	315.992	141.833
b0913	0.611289	0.51084	0.475521	0.349755	0.236628	0.409856	0.411107	1.19758	1.06497	1.2044	0	0.882456	0	0
b0914	4.10856	0.867393	0.319605	0.694033	0.318082	1.8627	0.487608	3.43718	4.2947	11.3329	0	26.4167	69.3491	4.25205
b0915	7.7994	6.98333	4.33367	1.9125	5.45867	5.17596	3.90091	8.14136	8.04548	29.636	0	7.78353	129.681	6.91867
b0916	0.417683	0.551129	1.0289	0.614524	1.30357	1.28022	1.43756	1.99042	1.83834	0	0	4.29417	21.9762	3.89043
b0917	340.45	217.123	36.7827	157.689	32.9467	961.97	40.4049	865.265	842.86	1006.16	0	205.136	2695.94	176.17
b0918	5.78285	5.4503	0.749745	2.97109	1.01933	16.3795	2.15699	28.476	25.6792	19.5321	21.2135	20.8444	39.5145	1.70995
b0919	0	0.672993	0.909241	0.364781	0.277643	2.01518	1.21064	5.26616	5.34902	0	0	37.4549	2.43959	0.659816
b0920	0	1.12441	1.50656	0.823166	0.618497	2.89385	2.29851	5.66055	4.47511	0	0	1.54622	0.247028	0
b0921	8.42613	8.99563	13.4073	6.19855	10.6747	11.1523	17.2731	15.3314	11.6947	49.805	0	26.7126	38.8378	11.0987
b0922	3.82649	2.12059	3.52234	1.18851	2.05519	5.79087	7.584	7.537	6.63133	9.04701	0	14.9866	19.6448	15.8405
b0923	4.5119	1.19068	2.33987	1.18013	1.24441	5.0995	4.498	10.6071	8.68794	5.33376	0	35.3761	34.8174	70.042
b0924	5.26513	5.42917	2.75577	2.88498	1.97442	5.04307	3.04335	5.8699	6.46386	5.18683	2.50371	21.3812	2.98475	12.9162
b0925	1.54161	0.711949	0.499674	0.273015	0.298376	0.910566	0.853813	1.91822	2.15567	0	0	6.8796	1.22896	0.531817
b0926	60.4202	3.98619	7.83346	1.45912	3.38867	12.4951	18.9046	28.7925	21.1532	32.4664	0	75.1389	10.0711	0
b0927	41.2646	4.35585	10.4324	3.54149	5.31614	13.9323	21.7931	31.2987	24.4048	42.6835	26.4902	37.0237	8.22392	0
b0928	13.5261	8.92377	7.46718	6.06288	3.35689	28.1681	16.0011	14.2776	15.4832	10.3161	0	74.1395	0.973936	1.35469
b0929	11.7449	8.13608	4.37783	6.67997	2.27321	24.4678	9.11841	75.4803	41.5292	46.281	0	897.008	20.9105	4.0517
b0930	33.8882	4.09497	5.87355	2.82824	3.13279	7.34598	12.6584	12.5226	10.4504	37.9527	27.4799	76.6794	8.8724	2.95341
b0931	12.0633	12.7339	16.8689	6.72605	11.0696	7.34537	9.56159	9.30727	8.11816	10.1862	0	21.3842	2.47287	1.33763
b0932	4.51762	1.05463	0.428018	0.525482	0.353114	1.21491	1.1548	3.61563	4.03881	9.24323	4.46175	28.9482	6.48252	1.61841
b0933	0	0.732107	0.513822	0.583086	0.460237	0.683281	0.846631	2.0145	1.1992	0	0	0.626844	0.505501	0
b0934	0	0.599734	0.589283	0.371511	0.494839	0.290233	0.809142	1.20331	0.833529	0	0	0.028528	0.483117	0
b0935	0	0	0.0594106	0	0	0.0438913	0.108769	0.727894	0.189079	0	0	0.189826	0.438364	0
b0936	0	0.0763041	0.0749745	0	0.167889	0.110779	0.205894	0.275575	0.6363	0	0	0.108888	0.553204	0
b0937	0	0.332368	0.163288	0.411777	0.274236	0.241268	0.298947	0.400119	2.59839	0	0	0.0948599	0.80322	0
b0938	0	0	0.367117	0.115724	0	0	0.504086	1.12447	0.389459	0	0	0.47986	1.35439	0
b0939	0	0	0.23554	0.0742474	0.13186	0.261017	0	0.865743	0.374811	0	0	0.376292	0.86897	0
b0940	0	0.276525	0.181138	0.157022	0.139432	0.234187	0.393806	0.471599	0.456385	0	0	0.388034	0.222756	0
b0941	1.0002	0.395927	0.129676	0.204384	0.217786	0.383207	0.474819	0.476633	0.825407	0	0	0.602666	0	0
b0942	0	0.184901	0.363358	0.229077	0	0.671103	0.498925	1.78073	1.15641	0	0	1.16098	0	0
b0943	0	0.203669	0.20012	0.126165	0.112031	1.3306	0	2.45185	2.54759	0	0	1.10444	0.492199	0
b0944	0.890634	3.29051	5.65806	2.83912	3.74928	2.30329	4.75656	4.52716	4.89992	0	0	1.20746	0.284002	0
b0945	9.71154	4.91214	5.94575	3.13108	3.32855	11.8342	10.6933	7.7989	10.0922	0	13.8543	17.1689	0.860216	0
b0946	14.0131	3.51312	6.35876	2.17624	2.44098	9.93232	8.31541	11.3522	15.2261	8.2828	71.9666	8.49627	1.78737	0
b0947	1.90969	2.96078	3.40437	1.36581	1.90583	3.06382	3.51297	6.37026	5.51583	8.46579	0	14.8149	3.04476	0
b0948	3.09207	1.86512	1.74672	1.51642	1.10609	2.85589	2.90954	4.59588	3.58453	1.30547	5.67139	10.9624	5.28207	11.4288
b0949	3.9622	2.31996	1.22003	0.951335	0.844762	4.36435	3.23288	5.70374	4.52999	1.46373	0	17.2154	3.31655	14.6083
b0950	2.04473	2.64405	2.22683	0.969358	0.890448	4.77873	4.07687	6.17115	4.72472	0	0	5.6212	1.30403	10.1575
b0951	1.47585	0.662107	0.727108	0.868551	0.23566	1.66806	1.15603	3.04763	2.96364	1.74469	0	6.32492	0.188246	2.74931
b0952	1.30759	2.93309	1.01717	0.855028	0.474527	3.1311	2.01741	6.02344	4.67599	7.72886	0	9.70078	0.833916	4.05976
b0953	1200.53	255.215	354.534	130.838	164.589	261.922	245.383	402.589	642.14	0	0	3436.04	0	0
b0954	96.1587	15.9104	8.70708	6.36265	5.31753	31.1397	10.3253	69.5835	60.8802	198.479	78.3875	180.085	160.127	7.89817
b0955	2.44556	0.430252	0.669362	0.377576	0.374723	0.962995	1.12872	2.84876	2.98989	6.42452	0	21.9397	22.5284	0.843657
b0956	4.04515	0.80063	0.524453	0.495958	0.1468	2.71218	2.16037	5.783	4.72915	11.955	0	6.93131	1.93485	0
b0957	600.042	8.28734	3.23026	7.21261	3.46603	9.14804	5.23629	26.6319	31.5556	291.469	119.96	1978.59	3.31036	1.61159
b0958	1.57916	1.87532	0.818953	0.129076	0.229233	2.11759	1.31192	7.27446	5.21276	0	0	31.2217	6.54624	0
b0959	1.08048	1.14055	0.70042	0.529892	0.548953	1.1384	1.15409	2.74608	4.60689	0	0	6.14417	1.37816	0
b0960	2.15642	1.67877	0.838738	0.810795	0.76692	1.735	0.818963	2.53479	2.75833	0	0	4.53957	6.8763	0.446346
b0961	6.25253	15.6753	7.02553	5.6217	2.11779	13.375	4.69969	11.9183	7.4531	0	0	9.10462	66.4593	4.31393
b0962	1.36482	1.38066	0.383388	1.30149	0.313688	1.80837	0.674908	2.09569	2.78447	2.68904	0	5.48243	10.6626	0.470827
b0963	13.7516	326.87	15.5366	256.596	7.12926	202.278	10.2586	105.786	106.458	34.8353	0	204.633	10.6494	2.03312
b0964	0	0.131177	0.257782	0.406294	0.50509	0.190444	0.707918	1.10541	2.05103	0	0	0.673896	0	0
b0965	5.0071	1.98205	0.973755	0.818533	1.09026	4.31634	1.78274	6.76054	4.82075	14.7979	0	38.844	2.39497	2.59099
b0966	138.397	17.4674	15.6028	8.85302	6.55106	49.5661	21.4241	63.084	53.7951	177.834	0	168.367	105.532	0
b0967	1.30898	8.52076	1.47081	7.1328	0.728382	7.52263	1.76064	4.29713	3.96081	0	0	9.57964	9.60023	0.451564
b0968	23.7029	23.4569	6.14616	16.468	6.02131	32.9198	15.472	54.5942	52.1617	0	0	29.4568	11.3374	0
b0969	20.5148	18.9483	7.31427	8.8033	3.72243	34.3867	9.73885	50.5096	48.6727	0	0	31.0958	32.7083	5.30781
b0970	23.0327	6.07828	5.06352	5.0749	2.18051	10.8388	8.20062	48.994	42.0094	59.1917	0	103.106	32.2522	7.25476
b0971	0	2385.42	3037.11	3017.78	4989.82	719.464	770.587	222.454	385.233	0	0	4.79447	40.5969	0
b0972	0	0.374057	0.122513	0.193095	0.411512	0.27153	0.112148	1.05071	0.779815	0	0	0.498205	0.301323	0
b0973	0	0.140352	0.20686	0.108678	0.0386015	0.127353	0.0946794	0.337924	0.475473	0	0	0.190273	0.169592	0
b0974	0	0.709729	0.697362	0.219824	1.30132	0.601062	0.638362	0	0.1233	0	0	0.472643	0.571724	0
b0975	0	4.0071	3.4648	3.47513	2.3805	1.86162	3.31583	1.54365	0.501227	0	0	0.960667	1.16205	1.25716
b0976	0	0.363597	1.78631	1.57664	1.00001	2.90331	3.27036	0.875427	1.51602	0	0	1.86791	2.63607	0
b0977	0	0.17821	0.35021	0.0551971	0.147041	0.452774	0.641162	0.536343	0.557285	0	0	1.1444	0.646011	0
b0978	0	0.0836694	0.28774	0.181405	0.161083	0.273312	0.301024	0.553987	0.915756	1.87402	0	0.250738	0.303301	0
b0979	0	0.977244	0.540121	0.643199	0.503951	1.06408	0.769105	0.588224	1.52798	0	0	0.505527	0.738021	0
b0980	0.391404	0.464808	0.152236	0.191953	0.284083	0.524855	0.510974	0.43521	0.699839	0	0	1.29711	0.499237	0
b0981	0	0.813621	0.689176	0.382349	0.617303	0.936833	1.31221	1.0808	1.63771	0	0	1.75361	0.0678016	0.880211
b0982	0	2.75005	0.270213	1.8739	0.907624	2.1959	0.989408	1.98638	3.15324	0	0	1.3343	0.664593	6.47089
b0983	0	0.486975	0.717734	0.867277	1.00451	0.618621	0.438007	1.17248	0.761415	0	0	1.92843	0.294213	1.90976
b0984	0.222297	0.263987	0.317028	0.145359	0.242017	0.404551	0.316589	0.529664	0.580921	0	0	0.661349	0.567081	0.460121
b0985	0	0	0.749745	0.0675248	0.119921	0.39564	0.19609	1.04981	0.909	0	0	0.93333	2.10744	0.854973
b0986	1.03945	0.411463	0.673822	0.169923	0.150888	0.796489	0.246726	0.990673	1.14373	0	0	1.64408	2.65164	0
b0987	21.6914	0.954054	4.68715	0	1.04958	2.77021	3.43248	5.74266	10.9393	0	0	44.6561	0	0
b0988	4.8494	32.4202	26.616	12.1555	15.9561	41.0297	36.2585	64.449	52.692	66.882	0	3.40898	1.0309	1.67292
b0989	0	15.2967	10.0201	6.31715	2.80474	25.9093	9.17239	184.149	255.119	456.821	0	416.205	0	0
b0990	17659.9	239.649	360.725	164.246	353.397	344.224	577.861	6107.6	5091.74	6395.49	4961.47	19765.4	0	0
b0991	292.604	3.86089	0	4.78333	0	8.40792	3.47266	171.972	169.028	0	0	57.2999	0	0
b0992	0.49828	0.328738	0.129204	0.20364	0.216993	0.429538	0.473091	3.32429	2.60427	0	0	2.19548	0.476668	0
b0993	0.164562	0.716556	0.46938	0.578386	0.214992	0.409817	0.273425	0.914901	0.973258	0	0	1.3634	0.0524749	0
b0994	0	0.625909	0.546669	0.560049	0.267782	1.61547	0.813181	2.34421	2.17477	6.23071	0	2.73912	0	0
b0995	0.926823	1.22293	0.480649	0.90907	0.403616	3.90603	1.64994	3.23888	3.56931	0	0	1.91968	0.591083	0
b0996	0	0.117391	0.0576727	0.109079	0.129145	0.0852148	0.15838	0.565281	0.611827	0	0	0.100512	0	0
b0997	0.536242	0	0.0231745	0.0438309	0.0778415	0.0684835	0.0212139	0.141966	0.344189	0	0	0.282721	0.170995	0
b0998	3.51928	0	0.608365	0.191771	0.255431	0.674171	1.25301	2.42243	2.58156	6.93389	0	0.706842	0.748142	0
b0999	21.6914	4.77027	5.62458	1.182	3.14875	15.2362	12.8718	26.4162	18.8951	0	0	42.2054	18.445	0
b1000	1.83569	0.726652	0.872655	0.300088	0.266471	1.64105	0.944066	3.30471	1.76737	0	0	19.1722	1.56095	0
b1001	0	0.107599	0	0.0666531	0.0295932	0.156213	0.0967792	0.582894	0.504711	0	0	0.153547	0	0
b1002	1.65557	0.218451	0.536612	0.202983	0.210285	0.475725	0.491213	1.4464	1.19547	0	0	38.7957	1.05585	0.428349
b1003	61.4644	0	43.8287	5.02393	8.92225	20.6053	47.4153	131.806	92.9922	181.651	0	2607.5	0	0
b1004	0	0.312253	1.22725	0.677	0.515279	0.793333	1.5447	6.57832	4.71953	6.99384	0	110.686	0	0
b1006	0	0.451885	0.690683	0.497644	0.497132	0.473815	0.361285	0.483554	0.680381	0	0	0.401242	0.121339	0.393811
b1007	0	0.221126	0.217273	0.136979	0.243268	0.321034	0	0.532403	0.921985	0	0	0.252443	0.534387	0
b1008	0	0.158874	0.468316	0.098416	0.087391	0.345982	0.142898	0	0.496818	0	0	0.226718	0.383944	0
b1009	0	0.196646	0.289829	0.121814	0.0540841	0.21412	0.176872	0.710192	0.922404	0	0	0.196434	0	0
b1010	0	0	0	0	0	0.287056	0.355681	0.952107	1.2366	0	0	0.112862	0	0
b1011	0	0	0.120162	0.0757559	0	0.0887734	0.109996	0.588888	0.254951	0	0	0.10471	0	0
b1012	0	0	0	0	0	0	0.108406	0.21764	0.125632	0	0	0.0515979	0	0
b1013	0	1.25343	1.64212	0.776449	0.459645	2.72961	1.00212	4.86211	3.77445	0	0	5.68403	1.34627	0
b1014	1.1058	0.233454	0.301069	0.0994232	0.104337	0.307157	0.170608	0.68504	0.304183	0	0	1.02026	7.33433	3.89102
b1015	4.23953	1.54911	1.52212	1.03958	1.06514	2.81128	4.02521	2.0203	2.51184	11.5657	0	0.786003	2.28781	0
b1018	0	0.0617038	0.303143	0.0764461	0.237588	0.179165	0.277496	0.297127	0.192955	0	0	0.79248	0.894703	4.83966
b1019	0	0.583107	0.104172	0.0985123	0.0291588	0.307841	0.429114	0.382892	0.718328	0	0	0.544655	0.384319	3.3262
b1020	2.51891	0.0664736	0.0653153	0	0	0.193014	0.0597894	0.64019	0.485032	0	0	0.265608	0.160644	1.04275
b1021	2.50355	0.660682	0.324585	0	0.181709	1.19898	2.07987	1.59072	3.78773	0	0	6.88255	0	0
b1022	0	0.251747	0	0.0935683	0	0.182745	0	0.0606128	0.104966	0	0	1.71003	0	0
b1023	0	0.122501	0.0601831	0.0189711	0.0673834	0.044462	0.137728	0.516151	0.255383	0	0	3.34766	0	0.240204
b1024	0.377721	0.224279	0.440743	0.0926215	0.123368	0.325611	0.448283	0.98999	0.727325	0	0	4.65145	0	0
b1025	0.740455	0.293107	0.0479999	0.0302614	0.107485	0.319152	0.263634	2.29356	1.37487	0	0	4.86591	0.118057	0
b1026	2.6618	2.37075	0.776479	1.46858	1.30407	3.44188	2.05338	9.09054	9.97634	0	0	1.15277	1.27318	1.37738
b1027	23.9985	5.27763	10.3713	4.577	2.32243	6.1297	0.949389	20.331	23.1053	0	0	24.1003	5.1017	0
b1028	0	0	0	0	0	0	0	0	2.0905	0	0	0.336094	0	0
b1029	0.5571	0.294035	0.505595	0.0910715	0.161739	0.640325	0.595054	0.353972	0.459742	0	0	0.188819	0	0
b1032	0	4401.27	5925.66	5182.26	6958.03	804.824	1329.64	343.792	910.55	0	0	230.135	0	0
b1033	0	0.629039	0.309039	0.389664	0.302761	0.570778	0.282893	2.27179	1.80316	0	0	11.4003	18.052	4.93378
b1034	3.36543	1.77626	0.545409	1.03155	0.610662	6.20523	2.09692	7.75148	7.86899	0	0	22.9081	33.5361	7.83667
b1035	9.4232	1.42101	1.57078	1.43042	0.781648	10.1862	4.31365	13.6854	16.2934	15.9138	69.1352	46.133	48.5066	12.5387
b1036	11.8764	37.6097	7.2589	24.2685	10.4671	26.0011	5.23527	55.7868	58.3384	70.1985	43.5666	29.5826	34.0837	14.047
b1037	0.703052	1.1132	1.00266	0.517189	0.663363	2.15488	2.41973	5.47217	4.6415	0	0	0.820765	0	0
b1038	0	0	0.318754	0	0	0.235489	0	3.51481	2.70523	0	0	0.370351	0	0
b1039	0	0	0	0	0	0	0	4.19267	1.21011	0	0	1.54622	0	3.03516
b1040	0	0	0.265496	0	0	0.196143	0.364551	1.62642	0.704135	0	0	1.11821	0	0
b1041	0	0	0	0	0	0	0	0	0.822402	0	0	0.225177	0	0
b1042	0	0.78897	0	0	0	0.572718	0.236545	0.949796	1.37067	0	0	1.20094	0.635557	0
b1043	0	3.26212	8.97477	4.44565	3.58876	13.2607	18.1914	7.85416	7.48076	0	0	1.11724	0	0
b1044	26.3021	6.94107	17.0503	4.83718	4.77256	30.8612	37.4587	20.8899	25.3232	38.8665	0	2.47628	0	0
b1045	7.22857	3.05217	2.81155	1.53619	0.944376	6.9237	6.17683	5.74114	7.7549	0	0	8.9833	1.84401	0
b1046	0.700653	0.138676	0.181679	0.343616	0.152561	0.503327	0.540502	1.11296	1.06005	2.0707	0	3.08716	0.446842	0
b1047	0.452183	1.3723	1.17251	0.110881	0.557936	2.59868	2.20029	2.58579	2.36335	0	0	3.03113	0.720952	0
b1048	1.91563	2.56978	1.07623	1.53968	0.764705	3.97548	1.743	5.52792	6.23559	7.54856	0	52.6507	101.502	28.7466
b1049	2.68472	2.66865	1.27627	1.18498	1.36401	2.9315	2.52776	3.72438	4.0372	8.46333	4.59595	25.7074	55.8742	16.8561
b1050	0	32.4407	7.96885	0	15.6139	41.2105	29.1786	48.8169	16.9077	0	0	24.3043	9.79976	63.611
b1051	0	4.33408	0	0.268479	0	2.5169	1.55931	5.21755	4.51773	0	84.3449	42.4282	1.0474	0
b1053	0	0.166354	0	0.0343499	0.0610037	0.16101	0.249377	0.467283	0.751413	0	0	1.80418	0.402021	0
b1054	1.83569	0.403696	0.158664	0.550161	0.222059	0.527481	0.290482	2.04114	1.43073	3.61678	31.4251	18.0891	5.65845	0.633266
b1055	2.04524	1.61921	1.32583	0.250758	0.259779	3.6731	3.03414	0.730976	1.40652	0	0	1.9448	3.58698	1.05834
b1056	0	0.997103	0.489864	0.205889	0	0.482535	0.89684	0	1.03935	0	0	6.87734	0.40161	0
b1057	0	0	0.335848	0.105867	0.0940073	0.124059	0.153717	0.205739	0.534432	0	0	0.877978	0.413012	0
b1058	0	0	11.1294	0	0	0	0	27.2713	70.8404	0	0	9.6982	0	0
b1059	1.41743	0.997486	0.673822	0.424808	0.205756	1.76495	1.2897	3.45235	3.83409	0	0	11.352	0.602646	0.488978
b1060	2624.99	373.973	880.417	188.128	403.136	807.121	1325.16	549.915	528.481	899.462	0	582.383	0	0
b1061	0	32.6898	23.3601	12.8864	27.7897	84.1327	50.7865	107.327	92.9319	0	0	117.896	28.7273	23.3089
b1062	3.09096	1.9033	2.20408	1.38955	1.68258	6.01989	5.74713	4.66437	5.52671	3.045	0	26.501	1.31418	0
b1063	2.6404	3.13559	2.90978	1.51073	1.34149	5.69035	6.89404	7.96892	7.26323	23.4102	0	26.6486	2.52588	0
b1064	4.12646	0.272241	0.534994	0.927533	0.524126	2.66789	0.734598	3.93282	3.97288	6.09764	0	53.6514	2.63166	0
b1065	0	0.621413	0.49957	0.419935	0.559339	0.41008	0.203246	1.42816	0.942175	5.06123	0	0.919023	0	0.443088
b1066	1.22562	0.646877	0.476704	0.100179	0.0889562	1.99568	1.0182	5.64585	3.70858	0	0	29.3089	52.3699	7.61054
b1067	0	1.22508	0.668743	0.252964	0.224626	2.37145	2.32623	3.76896	3.54721	6.09764	26.4902	28.0883	43.7513	6.40586
b1068	1.82752	1.44684	0.710812	0.796673	0.353713	2.68401	1.59054	4.74147	3.35143	0	0	13.1451	24.6698	3.78269
b1069	1.59635	1.81148	0.952048	0.861178	0.672013	1.95716	1.21252	2.89075	4.56691	1.88714	0	2.84956	5.39581	1.98253
b1070	9.83431	5.83932	6.37508	2.61244	2.31979	17.4262	12.8386	33.586	44.6362	87.1926	0	8.42549	0.783981	2.54444
b1071	26.704	19.9669	31.1595	13.0962	12.9213	81.8488	72.8928	113.115	113.859	210.455	0	12.7382	2.83842	0
b1072	17.0242	21.5382	22.7209	19.1537	13.3011	21.4858	22.4626	24.8152	23.966	23.6767	25.7149	1.47079	0	0
b1073	4.91716	10.7054	1.59377	3.61723	0.178445	20.0165	1.16715	48.4263	34.1535	58.1284	0	2.40728	46.2549	22.9
b1074	10.5957	6.2914	2.74745	3.89727	2.8839	21.3125	6.91628	43.3393	30.604	78.2858	0	1.09731	50.6806	35.6386
b1075	4.60294	1.57912	0.835479	0.978202	1.73724	7.0541	5.35356	18.1327	17.4733	32.6484	0	2.32279	18.7874	15.2438
b1076	4.7095	1.35581	1.38769	0.734887	1.4605	3.69072	3.30275	9.11303	10.7172	12.6531	0	2.40236	8.6009	8.41868
b1077	13.7943	1.92721	2.63004	1.32648	1.88461	4.43007	6.06697	9.02244	13.9505	19.1847	0	1.13063	10.3498	15.9556
b1078	19.2581	1.21972	0.998723	0.692605	0.782748	2.87756	3.74833	9.29957	9.95934	31.8725	0	1.97266	4.42148	7.97227
b1079	10.0588	3.13714	2.60825	2.16756	1.72563	3.15314	3.6899	10.3131	9.43289	5.40504	0	0.413243	0.874776	2.83912
b1080	3.87342	3.70543	2.57371	1.10811	2.07337	3.84919	2.87313	8.61387	6.06004	2.86186	0	0.729347	0.463178	1.50326
b1081	4.15329	1.17433	0.615398	0.290981	0.43064	1.93223	1.54917	6.03185	6.12048	3.50702	0	0.871422	0.567593	1.2281
b1082	3.23989	0.777273	0.229119	0.577788	0.277908	1.18488	0.978761	2.62	1.98501	1.74093	0	0.554597	0.187841	0.609644
b1083	4.0825	0.923454	0.378068	0.429032	0.21165	1.34068	1.03825	5.1879	2.96797	6.89449	0	1.58136	0.371946	1.20716
b1084	8.67034	2.02975	1.74055	1.16591	0.933798	3.69692	3.46874	9.84066	10.6365	10.7456	0	44.6591	5.26197	6.94695
b1085	0	46.4363	80.0345	13.2038	40.1988	53.6019	99.9668	160.375	168.224	0	0	0.217266	9.19842	0
b1086	2.31314	2.97586	0.899695	2.12703	0.461695	9.47162	0.823577	7.44052	10.1808	20.5087	0	15.5711	9.40446	1.79544
b1087	1.22562	2.58751	1.43011	1.20214	0.978518	3.287	1.16366	5.84054	6.40573	0	0	29.1704	2.34492	0
b1088	381.902	189.417	46.1865	84.6399	19.2826	483.342	107.668	796.06	791.018	1186.66	891.513	492.061	271.958	62.4885
b1089	11654	9689.33	1811.49	4209.7	950.445	23099.1	4223.67	45075.3	42200.7	51848.1	20915.7	11210.2	11148.5	2982.82
b1090	16.5033	19.8623	7.26185	8.0936	4.06533	38.7997	15.5503	56.1633	58.1224	26.6038	38.5254	48.9102	97.1172	78.67
b1091	30.3271	9.61931	7.03206	4.481	2.41281	22.4564	15.2968	32.7023	29.2786	37.9197	29.952	49.2417	40.1701	130.374
b1092	35.6241	10.8352	10.803	6.21844	4.42622	32.8493	26.299	35.6788	37.0387	14.2757	0	73.1724	36.0043	160.595
b1093	102.434	21.7821	23.1586	13.1472	12.8418	113.115	79.8743	161.771	174.189	185.142	108.692	211.497	45.6212	229.545
b1094	9596.38	64933.7	12928.4	18313	7751.81	30466.7	8019.42	22088.3	21125.5	19688.7	10861.5	14715.5	4762.9	5554
b1095	41.8033	18.5138	14.8105	7.20589	7.05955	41.6656	28.3921	55.3575	44.1754	56.268	53.1407	128.171	59.2593	36.838
b1096	2.19955	1.64463	0.570342	0.599283	0.532149	0.983166	1.13119	1.51402	2.52105	0	0	7.59303	13.3263	5.31152
b1097	1.06231	1.75213	1.17069	1.51953	1.38785	2.08589	1.38683	3.54361	2.48387	0	0	4.84068	12.3642	4.94734
b1098	4.18962	5.94277	5.83922	3.85253	3.87708	6.521	10.1932	9.81618	7.92331	12.3819	26.8957	3.90498	16.6996	5.41992
b1099	4.89436	1.43512	1.41012	0.800102	0.828883	2.81277	4.9051	4.23278	4.93659	6.42877	0	8.82674	8.15029	3.37686
b1100	5.24467	3.85559	2.13705	1.59226	1.25074	4.44936	4.09033	8.68798	10.305	0	0	18.3966	8.6009	2.32621
b1101	33.6372	5.07899	4.99049	2.89114	3.49852	13.0867	17.1619	72.3802	64.5798	98.3863	53.4279	19.8501	24.2167	1.43555
b1102	0.21164	0.167554	0.0823174	0.138391	0.15361	0.324343	0.301412	1.14302	1.51367	0	0	0.757168	0	0
b1103	22.3952	4.43254	3.38746	3.66104	2.98001	8.22277	5.31577	17.7869	11.2942	0	0	38.0928	42.8477	7.72578
b1104	25.6614	22.009	11.6445	13.1093	11.6408	15.0547	7.99449	13.2477	14.5591	0	0	42.2793	38.8683	9.9591
b1105	16.7585	1.65845	2.03694	1.02734	1.82451	4.31389	2.98337	4.49215	4.75399	6.19097	0	41.6532	12.3577	5.41992
b1106	5.71245	1.03641	1.11093	0.525285	0.46644	2.05182	2.03388	3.40275	5.59805	0	0	17.4252	33.9266	4.43397
b1107	6.34921	5.72478	10.0839	4.15173	4.91552	17.7882	21.6012	11.8504	11.1342	6.2548	0	22.5158	26.3199	3.28548
b1108	28.0261	25.1465	32.8839	28.9783	16.1715	55.8358	60.3699	85.4752	75.167	57.9796	35.9833	157.682	63.0048	5.80098
b1109	18.2914	23.8785	5.39888	8.20705	2.175	33.5115	9.14522	17.3094	23.9268	16.1024	0	23.5816	0.372298	6.04154
b1110	9.91061	2.42858	2.2027	0.578618	0.719318	8.00093	4.36875	3.59831	5.84189	0	36.3556	2.13271	0	0
b1111	0	0.707258	0.41696	0.350494	0.155615	2.46433	1.01782	3.06514	3.68614	0	0	12.5151	0.683681	0
b1112	35.9042	28.4251	9.30994	7.33677	2.60595	58.4629	21.3057	8.55485	17.2839	0	0	57.4651	0	0
b1113	0.575852	0.227949	0.149318	0	0.0835914	0.606722	0.273371	0.823246	1.50485	0	0	3.51314	0.918127	0.595963
b1114	1.66956	0.610051	0.432915	0.451384	0.223712	0.959486	0.701127	1.85642	1.94303	1.51821	0	12.5603	7.00286	1.86078
b1115	0	0.131495	0.129204	0	0.0361654	0.190906	0.118273	0.474898	0.479734	0	0	0.0938238	0	0
b1116	1.72877	2.56623	0.952571	1.13044	0.784219	2.23541	1.12845	7.96362	5.88493	2.55459	0	20.3775	37.348	12.9713
b1117	0.908368	9.70852	2.23763	7.72173	2.6372	8.09154	3.77321	14.7176	11.4942	5.36916	0	22.8854	71.5452	31.023
b1118	2.88852	5.39037	1.76548	4.58707	1.4376	5.65197	4.06477	11.6018	8.3998	2.43906	0	21.3207	31.1851	14.947
b1119	2.48086	3.27347	2.65356	1.77431	1.48551	5.46533	5.22615	12.2163	10.7484	10.9979	15.9262	23.3334	17.0084	16.6888
b1120	4.17542	1.46918	1.5338	0.568811	0.707126	2.26628	2.39512	7.62735	9.38003	16.4533	0	23.5322	2.88478	9.36268
b1121	0	2.81433	1.08637	1.183	0.663458	1.60517	2.16972	2.90402	4.08607	0	0	1.46302	0.485806	3.15341
b1122	0	3.06656	2.76203	3.00772	1.12454	10.0172	3.90746	3.9993	5.06113	0	0	6.12652	1.23514	10.0217
b1123	12.3638	22.8395	7.14657	20.0854	5.38425	27.2375	10.088	11.62	14.3836	0	13.2285	39.7709	25.1336	18.6603
b1124	12.0538	14.0162	4.19995	12.8082	4.42904	13.638	7.68924	8.25713	10.7762	4.45296	0	16.1431	52.1297	27.2886
b1125	6.39315	4.6865	1.84194	2.38054	2.26854	7.89254	3.03498	5.3033	7.22993	4.19872	0	8.1591	51.6451	23.5251
b1126	5.55467	1.46587	1.02023	0.908045	0.503951	3.23658	1.26353	4.77932	5.66626	8.2081	0	23.9515	33.6537	12.9345
b1127	7.14422	4.15885	2.01595	2.95409	1.31158	12.3977	5.43643	22.7634	22.7158	12.42	0	40.2459	5.22627	0
b1128	3.29596	1.80172	1.15987	1.15458	0.751843	4.73543	2.0676	10.845	12.6932	8.34929	0	23.5301	8.25787	0
b1129	1.01713	0.984204	0.307699	0.609675	0.541377	1.26651	0.684047	1.88495	2.56477	2.00401	0	18.9606	11.8924	0
b1130	0.972944	1.66893	0.756852	0.954308	0.423701	2.0502	0.92376	5.87283	4.41603	5.75086	24.9837	22.4971	34.4376	0
b1131	4.76144	1.20821	0.712292	0.80831	0.584841	1.96458	1.08672	3.95621	3.5767	8.65963	0	39.8623	15.767	7.96018
b1132	15.7111	2.62587	0.135796	1.28418	1.52042	4.51454	1.36738	6.48866	6.62677	12.3819	0	39.3654	51.4348	22.7637
b1133	14.8519	5.87907	1.7392	2.34958	1.25182	6.01142	3.0704	6.69697	6.0623	8.49543	24.6047	47.6134	27.8043	9.42067
b1134	1.93671	1.53328	1.25547	0.474903	0.421703	1.11302	1.14925	6.46041	5.59388	11.4475	0	23.7767	32.7312	18.0391
b1135	0	0	0.263524	0.0830689	0.22129	0.681402	0.120615	2.26008	2.2365	6.00708	0	18.0647	17.1758	7.36251
b1136	12.3052	1.35305	1.16993	0.637	0.357247	3.65372	1.80115	8.40489	7.16473	14.5466	0	80.9408	6.14732	2.97148
b1137	0	0.520923	0	0.0806727	0	0.283605	0.468542	2.19488	0.950243	0	0	9.47801	2.20306	0
b1138	0	1.54788	0.233987	0.221274	0.0654952	0.518593	0.321286	2.29343	0.868794	0	0	13.0494	3.45296	0
b1139	0	0.420621	0	0	0.0462738	0.48853	0.226995	1.11399	0.964577	3.76842	0	4.63385	0.203299	0
b1140	0.467634	0.370223	0.545658	0.305784	0.373353	0.268747	0.166498	0.965662	1.0291	0	0	1.3208	0	0
b1141	0	5.9436	2.92002	5.52274	8.17343	4.3145	5.34595	25.0431	24.7818	0	0	6.78537	0	0
b1142	0	28.6319	18.7553	15.5865	23.3855	8.18767	4.68234	11.4894	13.566	0	0		0	0
b1143	4.46232	1.7664	1.15708	0.729475	0.971633	4.27412	0.529592	14.8852	7.36498	0	0	41.1715	1.42293	0
b1144	0	5.45469	1.78655	1.12632	1.00015	7.25924	1.6354	18.6053	14.2146	0	0	4.41094	0	0
b1145	0.966076	2.67693	0.876761	0.789643	0.140237	4.62666	0.687929	4.45026	2.52461	11.4205	0	23.1751	2.15641	0
b1146	0	0	0	3.72391	0	17.4552	0	14.4739	18.7988	0	0	6.86292	0	0
b1147	0	5.45277	11.234	1.52545	3.77342	7.40566	13.1313	2.32926	2.01684	0	0	0.351413	0	0
b1148	0	1.21722	4.78403	1.50804	2.00865	0.441793	1.64223	0	1.90319	0	0	0.868505	0	0
b1149	0	0.0484579	0.0476135	0	0.026655	0.0351759	0	0.116671	0.101023	0	0		0	0
b1150	0	0	14.7131	4.6379	0	0	0	0	0	0	0	0	0	0
b1151	0	0	0.237643	0	0.133037	0	0.217537	0	0.252105	0	0	0.190891	0	0
b1152	0	0.299867	0	0	0.109964	0.0725584	0	0.120331	0.312573	0	0	0.204217	0	0
b1153	0	0.323438	0.158901	0	0	0.234786	0.145458	0	1.01143	0	0	0.184623	0	0
b1154	0	0	0.140084	0	0	0.103491	0.384697	0.34326	0.445828	0	0	0.244139	0	0
b1155	0	0.991023	0.324585	1.02317	0.363419	0.71939	0.594248	0	1.37736	0	0	0.471407	0	0
b1156	1.16312	2.60904	1.20639	1.90141	0.422101	1.89392	0.414122	3.69515	2.07969	0	0	0.788439	0.370892	1.20374
b1157	0	0	0.185477	0.116933	0	0	0.169785	0.227245	0.196765	0	0	0.492818	0	0
b1158	0	0.355252	0.523593	0.110032	0	0.515759	0.95859	1.06917	0.740611	0	0	0.0506956	0	0
b1159	0	0.185534	0	0.172396	0	0.740741	0.584072	4.57875	2.12735	0	0	1.24439	0.448373	0
b1160	0	2.19283	1.43641	0.452789	0.402066	1.06119	1.97233	4.3997	3.04766	0	0	2.29477	1.76644	0
b1161	0	2.79618	1.37373	0.216515	0	3.04464	3.14376	5.89078	3.64333	0	0	3.99024	0.844676	0
b1162	3.40732	4.38353	2.42967	0.765889	1.1747	3.58998	2.5274	6.63018	7.26398	0	0	28.6467	1.08651	0.88158
b1163	2.134	0.0563159	0.332008	0.104656	0.0619549	0.12264	0.253266	0.271182	0.293511	0	0	4.21111	0.136097	0
b1164	0	3.48825	0	0	0	0	0	12.5979	36.3606	0	0	5.97341	0	0
b1165	0	0	0	0	0	0	1.58415	4.24053	9.17939	0	0	2.01068	0	0
b1166	0	0	0	0	0	0	0	0	4.13726	0	0	1.6992	0	0
b1167	0	0	0	0	0	0	0	6.76935	5.86139	0	0	0	0	0
b1168	0	0.127573	0	0.0526842	0.0701734	0.246949	0.191241	0.767889	0.797872	0	0	0.230597	0	0
b1171	5.12869	4.06035	15.2935	2.93443	3.35019	22.1058	33.4773	13.8494	14.108	0	0	10.4297	4.90625	0
b1172	0	2.85116	5.60295	1.41294	2.50932	16.5574	20.0028	7.55116	9.51031	0	0	6.02166	5.51222	0
b1174	135.362	47.6289	48.749	23.3575	7.64139	191.598	103.529	344.027	351.668	266.698	0	783.332	163.063	140.089
b1175	9.48059	3.46418	3.78202	1.60944	0.952763	15.4373	8.39547	27.6864	29.7905	17.2424	0	89.5872	12.3251	7.54746
b1176	11.9677	5.46618	4.29675	3.23559	2.07132	16.8417	7.53869	20.9111	21.6517	16.3242	0	155.488	15.5583	6.66918
b1177	6.90055	14.5683	25.0503	10.1526	12.7716	45.9361	56.5085	20.8263	18.5075	40.7876	0	26.2467	0	0
b1178	0	1.42568	6.65399	0.883154	1.37238	11.9015	14.7467	8.58149	4.45828	0	0	18.2087	0	0
b1179	10.6531	3.51418	11.74	3.04765	3.47945	21.9383	21.4935	27.9214	8.79141	0	0	135.092	49.2569	0
b1180	1.00142	1.71777	2.20718	0.73668	0.726837	4.50817	2.73354	6.20379	5.50942	0	0	9.579	9.57987	0
b1181	3.87342	0.766641	0.502188	0.158301	0.281135	1.66953	0.459701	7.69096	4.79476	22.8949	49.7317	32.6018	5.55813	0
b1182	0	0.0818368	0	0	0	0.118812	0.0736077	0.394075	0.511827	0	0	0.490492	0	0
b1183	0	1.59341	0.626258	0.592233	0	0.925332	1.14655	1.15093	2.65749	0	0	2.27385	3.85073	0
b1184	0	0.478492	0.626873	0.494011	0.350936	0.69468	0.478197	1.02405	0.997536	0	0	0.242782	0.642418	0
b1185	5.84459	30.4619	22.9219	12.5402	10.393	14.9749	10.9249	19.9604	18.6899	60.4556	0	10.3448	22.3644	3.02435
b1186	0.635577	0.419318	0.576817	0.285726	0.276783	0.517456	0.301723	2.32205	1.87947	9.39188	0	9.29884	8.91748	2.63109
b1187	2.62074	1.84429	0.792816	0.785443	0.50724	1.50613	1.14045	6.2444	8.41066	15.4906	22.4322	37.0105	5.01414	0
b1188	0.320018	0.21113	0.207451	0.130787	0.0929083	0.122608	0.34182	0.1525	0.264092	0	0	3.12136	0	0
b1189	3.13123	0.309872	0.152236	0.0639845	0.0284083	0.374896	0.371617	0.621729	0.269169	2.3135	0	0.751735	29.3302	3.64566
b1190	4.5009	0.197963	0.453865	0.245261	0.254083	0.622712	1.54316	1.27102	0.962975	0	0	1.1865	35.7213	4.14053
b1191	0.552229	0.582929	0.823359	0.586789	0.541095	1.26945	0.819239	1.84211	2.65838	3.2641	0	8.07942	2.20116	0
b1192	1.23483	0.32587	0.160096	0.403727	0.17925	0.709653	0.293103	1.66726	1.61347	0	0	10.6259	5.51262	0.63898
b1193	2.26841	4.48972	1.1764	1.57601	0.905535	9.34279	2.69217	7.56688	8.26794	13.4081	0	11.8743	1.08501	0
b1194	0	2.56917	0.768296	0.830347	0.860215	5.35166	1.708	4.03419	4.54101	0	0	0.223165	0	0
b1195	0	5.01978	2.46615	4.66433	4.14181	3.64388	6.77253	18.1291	20.9299	0	0	4.29803	0	0
b1196	2.14965	0.283644	0.557402	0.175706	0	0.617696	0.255122	1.36585	1.47831	0	0	1.13335	0	0
b1197	0.283551	0.486386	0.183812	0.13906	0.267544	0.488867	0.336522	0.90082	0.623996	0	0	6.37494	0.452089	0.880363
b1198	11.2392	1.9001	1.54823	1.55024	0.968702	2.82587	2.45934	13.9477	12.2218	22.8362	9.01892	6.77214	41.215	7.99682
b1199	13.9362	1.83887	1.94581	2.36584	1.0115	5.44207	5.72526	25.3725	23.2964	57.0281	0	10.658	134.001	25.5175
b1200	10.002	1.38574	1.16708	1.43069	0.871142	1.67653	2.78956	18.3504	20.1537	17.7359	25.6836	8.21133	64.4259	10.3513
b1201	0	3.01698	1.65752	2.29091	0.785158	2.1665	1.34222	1.91362	2.26563	1.45321	0	2.14804	0.470389	0
b1202	0	0.786358	0.508326	0.397385	0.284571	0.570822	0.521159	0.448414	0.905961	0	0	1.70686	0.200038	0.162308
b1203	4.87628	2.05894	0.948312	0.637717	0.990985	3.64308	0.983826	4.64746	3.55463	20.1758	12.5215	70.6265	7.15266	0
b1204	0	1.45547	0.476704	1.20214	0.622693	2.58264	0.581831	2.5309	2.52858	7.24436	0	12.6467	14.0695	0
b1205	106.663	34.4034	9.21925	25.1864	11.1824	38.5956	19.6916	165.665	123.884	210.154	0	405.255	30.2332	0
b1206	3.15833	1.0229	1.74958	0.821395	1.16701	2.11759	2.76014	1.91553	2.5274	0	0	7.47158	20.5085	2.97148
b1207	57.6463	8.07206	6.55866	4.61568	4.78171	14.5925	9.56416	20.93	19.1745	62.5838	45.3142	156.128	69.4014	9.13156
b1208	49.7882	10.3492	5.48236	5.85346	4.15818	8.36181	5.42325	13.3255	17.448	48.376	17.5135	12.5598	84.166	2.8234
b1209	3.29344	1.01399	0.99632	0.179464	1.27488	1.99788	1.95434	1.22068	2.11391	0	0	28.5264	65.4624	1.13615
b1210	5.7082	4.94954	1.26869	2.46617	1.03576	9.29467	3.09693	13.2123	14.0758	12.05	0	41.4423	3.64041	1.68787
b1211	2.95738	1.62593	1.08637	1.0072	0.715494	5.38204	2.51539	9.70852	8.33854	2.9134	0	44.4375	2.82911	4.59099
b1212	5.62442	3.43238	1.64071	1.32171	0.969531	6.66667	3.08724	7.92906	6.57546	0	0	14.3237	2.01768	6.54845
b1213	14.356	13.6387	33.1304	6.33647	12.0868	56.1023	60.9956	29.1891	21.7198	0	0	28.6537	39.369	26.7433
b1214	9.53138	6.86874	13.9734	6.83183	5.26827	19.5931	24.1031	20.1481	20.9752	8.66736	0	25.2365	13.3263	7.58789
b1215	12.2157	8.77561	10.3824	4.10484	4.58088	21.9709	18.6054	19.7275	21.3752	20.0567	0	91.8785	11.6859	8.4282
b1216	3.37729	0.8276	0.375313	0.236615	0.35018	1.84849	0.687121	4.13848	4.44606	5.70355	0	13.518	3.07696	0.49932
b1217	0	3.86089	0	0	0	11.2106	0	4.6479	12.0735	0	0	27.548	0	0
b1218	0.920589	0.850295	0.716125	0.827709	0.668169	1.76353	0.655538	2.33971	2.78559	5.44139	0	2.11478	0	0
b1219	27.6348	22.9202	3.58285	14.1981	3.43843	57.8544	5.15386	36.9987	23.8914	46.6695	0	156.105	1.25887	0
b1220	0.358587	1.18288	0.371926	0.791368	0.468477	1.51124	1.06394	4.78465	3.94561	0	0	2.3092	0.343035	0
b1221	9.21507	2.56694	0.796488	1.08798	0.59452	9.12064	2.67337	24.2336	24.2222	6.05202	0	56.1805	7.18291	3.17897
b1222	2.12324	2.69654	0.963474	0.80266	0.828322	4.21992	1.85842	5.69141	6.13266	10.9813	0	15.6021	3.04673	0.549349
b1223	5.75247	9.53535	1.77129	1.73383	0.782846	13.1204	2.30414	50.0281	56.1254	74.3784	27.6964	95.7111	34.2789	1.86043
b1224	5.64052	1.90717	1.69111	0.40341	0.247341	1.73334	2.41271	18.8714	20.898	27.7832	15.0875	412.048	160.415	33.444
b1225	21.9784	0.966677	1.11502	0.442605	0.231189	2.2577	3.25108	27.2717	24.1395	33.8894	24.5379	296.852	10.2587	13.8454
b1226	65.907	1.99781	2.54035	1.16477	0.581785	4.7772	7.39909	45.2716	40.1794	47.3791	45.7402	255.109	1.98801	10.1391
b1227	141.977	3.6708	2.73622	1.64663	0.974777	4.31858	8.42499	22.2477	22.2984	39.6917	49.2669	118.892	1.2236	5.95685
b1228	25.1513	134.407	159.782	125.404	190.764	72.2717	107.459	253.694	209.289	0	0		0	0
b1229	0	165.777	244.333	277.269	364.753	36.1016	44.7322	79.8278	120.961	0	0	52.0452	0	0
b1230	0	1215.71	1682.43	880.363	1478.71	621.47	1278.27	1958.23	2016.84	0	0	175.929	248.277	134.299
b1231	0	1215.71	1682.43	880.363	1478.71	621.47	1278.27	1978.84	1998.99	0	0	234.571	248.277	0
b1232	6.92382	2.92349	4.39859	0.905493	2.21115	9.21821	9.12115	10.6683	9.99919	4.09251	0	22.9716	1.98705	0
b1233	5.89353	8.03567	3.82047	2.56917	1.14068	17.6876	4.663	18.4112	14.8609	11.6118	0	22.3425	3.13217	0
b1234	0.625888	1.98205	1.94751	1.07432	0.908546	4.73598	1.11421	5.26925	5.93985	0	0	14.2129	2.39497	0
b1235	0.537412	1.91459	0.905779	0.527118	0.27304	2.62521	0.637805	2.7317	3.47404	0	0	15.1991	2.39915	0
b1236	5.60735	22.6076	7.59302	12.1712	1.94448	40.6992	11.683	23.95	16.7101	14.7306	0	35.7812	1.3907	0.644798
b1237	35.0497	73.6661	11.0359	27.2162	5.45128	184.164	13.6677	398.077	257.221	591.917	192.862	1737.8	113.362	12.9549
b1238	2.23143	0.883303	0.144652	0.18239	0.161958	2.99224	0.794484	9.21578	5.5244	0	0	13.9496	2.13464	0
b1241	17.7705	2.88075	1.53596	2.91885	2.19879	5.13872	2.55091	7.15101	9.73006	27.0096	17.3835	258.676	10.4157	22.0693
b1242	2.06323	3.53913	4.6812	1.85507	2.39601	4.44648	4.65245	8.35725	8.37142	0	0	5.4778	0	0
b1243	29.7093	4.35132	1.23258	2.91402	1.09972	7.31327	1.62193	11.9396	13.6888	26.3408	15.2578	243.602	1.51577	0
b1244	11.0141	4.52139	2.06264	2.65078	0.843824	8.67413	2.03337	14.774	15.4013	0	0	19.3335	0.390238	0
b1245	13.7069	11.1805	2.82719	7.63881	2.12536	17.0674	5.76754	17.1213	16.453	14.7306	0	71.1635	0.198672	0
b1246	13.9727	9.00569	1.95091	4.39265	1.75525	14.207	5.67647	15.6219	17.8137	19.0591	0	109.854	0.171368	0
b1247	17.4022	7.31913	1.55113	4.00051	1.42094	8.22994	4.06607	15.6354	13.613	22.5007	0	123.39	0	0
b1248	10.2574	15.5647	14.6285	12.9953	7.81711	42.2466	19.4777	58.6563	66.3077	30.3145	0	82.8578	31.0729	0
b1249	2.71235	4.33944	1.75828	3.40864	1.77178	3.5722	1.93143	5.22401	4.94301	0	0	10.9167	2.16226	0
b1250	0	0.16188	0.265099	0.334261	0.0296816	0.705059	0.630944	2.7283	1.96863	0	0	4.55857	0.130403	0
b1251	0	12.2396	4.37322	6.20343	2.44822	7.2694	2.00162	41.5248	37.115	0	0	77.8046	2.689	0
b1252	0	1.49848	0.226519	0.856847	0.317025	1.67347	0.207355	1.80394	2.04259	0	0	5.6256	1.94994	0
b1253	8.26676	62.5387	7.50249	18.9196	2.20002	90.0026	13.4085	45.5222	31.4573	32.5753	0	28.9526	7.02952	0
b1254	8.49481	10.0879	7.70945	12.0353	6.78214	14.239	6.88918	13.2688	10.3207	8.36849	0	16.2086	32.5055	0
b1255	3.32455	1.09668	1.29308	1.01902	1.08584	3.02513	1.97281	5.80901	5.48712	4.91267	0	18.3731	19.8773	0
b1256	8.44386	2.92467	1.23159	1.20781	1.22572	2.52742	0.751594	2.01191	2.0324	0	0	14.5082	6.39479	0
b1257	0	1.05401	0.828513	0.522332	0.347864	1.3772	0.758417	0.761315	2.63681	0	0	0.721969	0.509435	0
b1258	0	0	0.212079	0	0	0.31336	0	0.779514	1.79989	0	0	0.985636	0	0
b1259	0	0	7.60891	0	0	5.6213	0	9.32238	0	0	0	4.42029	0	0
b1260	2.94853	0.972638	1.43353	0.54226	0.802522	1.41209	2.18709	1.63927	1.62216	0	0	5.63522	0.705161	0
b1261	1.30482	0.229559	0.394728	0.177753	0.252545	0.499915	1.44533	1.58903	1.07679	0	0	5.0121	0.693458	0
b1262	0.738458	0.389755	0.335093	0.0603594	0.107195	0.212194	0.613486	1.46626	1.2696	0	0	2.24473	0.588691	0
b1263	0.305039	0.362246	0.316386	0.199464	0.221399	0.204522	0.687844	0.726813	0.629327	0	0	0.827099	0.291809	0
b1264	0.312706	0.0825224	0.162169	0.076679	0.0226964	0.119807	0.0371122	0.397376	0.215048	0	0	0.282629	0	0
b1265	0	0	0	0	0	0	0	0	0	0	0	6.18734	0	0
b1266	0	5.91478	5.4748	3.23916	2.78199	11.2006	7.17047	4.74698	6.07606	7.67994	0	18.5693	2.48591	0
b1267	4.42677	3.21259	3.87402	1.99007	1.92778	13.2502	8.53731	10.8992	6.39301	19.6242	0	27.2567	4.23477	0
b1268	0.249443	0.592447	0.614463	0.468941	0.162942	1.62467	1.27298	2.25851	1.44095	2.9488	0	3.30661	0.795412	0
b1269	19.0206	5.53875	9.01371	2.09079	2.71345	15.1401	20.2386	18.5448	22.5526	15.5071	33.6841	19.8588	4.39205	0.678789
b1270	6.02027	1.42986	1.87326	1.27941	1.13608	3.11384	4.57275	8.22414	9.10832	14.2338	0	12.0614	3.07155	3.73831
b1271	1.61329	0.53218	1.1504	0.725262	0.468374	0.6181	1.24453	4.61276	3.21744	0	0	9.44741	1.54332	2.50445
b1272	2.56614	20.1805	3.327	10.068	1.97427	15.2882	4.26373	8.56004	11.7179	3.03358	13.1789	16.2159	8.67377	1.0623
b1273	624.353	387.996	334.234	218.947	195.882	522.786	509.13	700.63	770.092	357.136	1034.35	1259.82	32.1115	0
b1274	8.39351	2.81493	1.29226	2.11536	1.05342	3.73502	2.49037	7.44412	6.97477	6.20152	4.49025	35.5142	8.86586	1.44777
b1275	2.26528	3.88572	2.05585	1.80529	1.68526	3.47159	2.41961	5.75729	5.37454	0	0	42.377	0.722344	0.586099
b1276	1.52318	0.714604	0.329134	0.207501	0.245675	1.03747	0.622662	1.63989	1.51305	3.00106	0	4.51245	1.83489	0.350306
b1277	6.02027	6.6727	3.27821	2.65723	2.27217	17.4144	6.14463	16.4483	19.0447	21.3507	0	47.7921	6.1431	1.2461
b1278	2.39174	1.26235	0.413452	0.325824	0.520782	0.763624	0.567709	4.43238	3.0703	4.71235	0	10.9886	4.06757	0
b1279	34.4495	9.09114	17.8655	9.57372	12.0017	31.6767	38.4319	85.3656	80.5492	162.898	0	153.345	83.4868	0
b1280	4.46285	7.12531	5.72822	4.96102	2.78568	4.83034	4.34318	11.2716	8.90041	7.91368	11.4599	18.2521	4.83853	0.461871
b1281	12.6204	3.77455	4.03603	0.894012	1.46559	7.81697	6.79001	5.74679	5.78602	4.97308	0	5.70326	2.68289	4.35371
b1282	63.9188	14.7595	13.8118	2.61227	4.63927	36.7338	31.6081	21.9987	24.909	31.4841	136.778	18.4546	13.5881	22.0504
b1283	35.3767	32.6755	13.7598	5.78319	5.13533	47.4386	29.3898	67.4334	34.0601	0	0	39.9677	0	0
b1284	17.2445	3.25056	5.11027	1.34239	2.08602	7.62937	15.0083	10.9568	12.1979	14.5612	0	20.7502	0.785549	0
b1285	0.946043	0.218451	0.122654	0.193317	0.171661	0.385111	0.533317	0.6011	0.780713	0	0	3.96352	0.452505	0
b1286	2.92403	1.51114	0.979341	0.736922	0.583626	3.59424	2.08216	3.44482	4.05523	7.20137	6.25704	27.3639	10.9557	0.756537
b1287	0	0.185111	0.242514	0.0764461	0.237588	0.671867	0.554992	1.26279	1.09341	8.29224	0	2.13089	12.675	0.967931
b1288	39.6109	6.23174	3.95042	4.35842	2.48797	11.3091	5.87633	83.0064	72.7111	153.086	19.5605	142.086	96.1897	11.0369
b1289	7.89567	2.08365	2.04734	0.968054	1.14614	3.02507	1.4056	4.38968	7.05881	0	0	7.28492	0	4.08571
b1290	2.2114	1.75075	1.33797	0.783264	0.695519	2.82417	1.74967	5.97161	4.66372	8.71404	0	17.0167	0.235054	3.81438
b1291	2.763	4.15616	1.43289	3.34243	0.762054	5.24002	1.44283	3.33558	3.42022	6.5326	0	21.4972	1.5859	6.2909
b1292	2.56214	0.845179	0.332181	0.471199	0.371923	2.39273	0.98825	4.1716	3.96446	3.78605	0	3.1841	8.17004	8.61776
b1293	2.29376	3.17792	2.15604	3.84345	2.33075	4.00956	1.97363	3.46136	4.73226	3.38947	0	5.72273	12.6171	7.71506
b1294	1.47268	1.24364	1.22197	0.794458	0.855102	1.52341	0.699115	1.49714	2.43063	0	7.56321	10.5484	7.8893	3.35304
b1295	0	8.9154	2.92002	3.68183	1.63469	17.258	10.6919	17.8879	52.6614	0	0	81.4244	158	69.9268
b1296	1.44571	0.14307	0.234295	0.177253	0.183629	0.276948	0.257368	0.344468	1.09364	0	0	0.231388	0.115251	0
b1297	1.4049	0.231719	0.0910726	0.172249	0.0764764	0.26913	0.33347	0.502116	0.917845	0	0	0.489393	0	0
b1298	0.797248	0.631176	0.516815	0.847142	0.173594	0.916349	1.13542	0.633197	1.4255	0	0	1.47116	0	0
b1299	0	1.05538	1.90114	0.871684	1.54807	3.1921	4.42985	4.23502	4.21703	0	0	10.2914	0.425081	0
b1300	0.33165	0.0437609	0.25799	0.108432	0.072214	0	0.157442	0.42145	0.273691	0	0	0.274772	0	0
b1301	0	0.052547	0.0516314	0	0.0289043	0.114432	0.0945263	0.316292	0.438189	0	0	0.16497	0.126988	0
b1302	0	0.479905	0.157181	0.231219	0.117324	0.193537	0.287766	0.513538	0.72257	0	10.3771	0.121749	0.128863	0
b1303	0	0.446505	0.146242	0.184395	0.081869	0.594221	0.73628	1.43339	1.55142	0	0	4.56644	0.179842	0
b1304	2.93973	1.68088	0.381136	0.32038	0.56898	3.56662	1.16297	5.13661	5.25631	5.79203	0	30.5184	0.937409	1.01413
b1305	64.486	0	0	0	0	18.5299	30.6131	46.095	48.7818	0	0	9.71394	30.8446	0
b1306	7.46507	0.492504	0	0.91526	0	4.64765	4.87279	5.33608	7.7006	0	0	2.95184	2.38043	0
b1307	0	4.45893	13.1437	5.52425	0	35.6044	52.1373	37.5749	32.5351	0	0	21.6343	21.5514	0
b1308	6.28532	4.14671	2.44467	3.08247	2.28096	14.4486	9.69733	20.9664	26.799	111.453	0	338.717	10.0212	0
b1309	0	0	0.0372251	0.0469368	0	0.0275011	0	0.273648	0.276434	0	0	1.09208	0.0915558	0
b1310	0	0	0	0.0321763	0.0285717	0	0	0.0625305	0.595578	0	0	0.637462	0	0
b1311	0	0	0	0.053101	0	0	0	0.103195	0.536123	0	0	0.0978618	0	0
b1312	0	0.274077	0.0897672	0	0	0.0663181	0.0821726	0.219964	0.571382	0	0	0.286819	0	0
b1313	0	0.202401	0.132583	0.125379	0.148445	0	0.182049	0.487318	0.351629	0	0	0.462132	0	0.529168
b1314	0	0	0	0	0.110576	0.145924	0.0904051	0.605003	0	0	0	0.803229	0	1.5767
b1315	0	0.201647	0.0660446	0.249825	0.184866	0	0.181371	0.566421	0.630576	0	0	0.920824	0	1.58159
b1316	0	0.268464	0.290164	0.149672	0.118138	0.253343	0.241468	0.420144	0.419759	0	0	0.291161	0	0.631697
b1317	0	0.132136	0.129834	0	0	0.0959186	0	1.43164	0	0	0	0.15085	0	0
b1318	0	0.150698	0	0.0466757	0.0828938	0	0.0677724	0.816376	0.314167	0	0		0	0
b1319	0	0.0825853	0	0	0.136282	0	0.297124	0.497099	0.344339	0	0	0.0942815	0	0
b1320	0.548174	2.02527	1.49248	0.761705	0.159147	1.83769	0.520463	1.48028	1.8849	0	0	3.40622	0.349599	0
b1321	1.07295	2.2652	0.927386	1.1401	0.467252	2.19243	1.35828	0.795358	1.1314	0	0	1.09097	1.4826	0
b1322	1.01129	2.00157	1.44224	0.909257	0.880798	3.09964	3.78065	1.12447	1.46047	0	0	1.00923	2.09609	0.523303
b1323	2.22452	2.7675	1.03003	0.831204	0.553566	3.62219	1.4709	7.8243	8.39206	5.63513	0	24.6533	8.20814	3.28887
b1324	25.5616	52.9111	9.73502	27.6836	3.94246	208.416	13.8411	147.695	146.343	132.203	0	201.73	21.9057	1.65339
b1325	2.8672	1.36197	1.70996	0.749941	1.53996	1.48299	1.70141	3.1881	2.445	3.38947	0	8.9836	7.49709	4.74773
b1326	0.857166	1.13102	2.33376	0.840748	1.92862	1.97044	2.95015	3.26777	3.53684	10.133	0	9.36123	0.546659	0
b1327	0	0.403696	0.396661	0.350103	0.177647	0.58609	0.363102	0.291592	0.504962	0	0	1.03696	0.195119	0
b1328	1.26333	4.58412	1.7198	2.83968	0.871086	3.99317	2.09907	3.2108	1.65071	0	0	4.11531	1.20854	0
b1329	1.80608	0.913524	0.624421	0.6151	0.393259	1.96057	0.714492	2.9167	3.02231	0	0	14.9974	4.7993	0.623052
b1330	1.57512	0.831344	0.816858	0.128746	0.381078	1.40811	2.36787	3.66963	2.23864	0	13.4822	4.50815	0.334846	0.543378
b1331	27.8361	6.49829	11.6597	3.63164	7.03241	22.509	27.6995	42.6009	37.7704	44.2973	13.7459	43.7255	34.3102	27.1462
b1332	143.617	111.332	4.65497	33.7491	5.2119	118.645	19.1752	233.833	190.123	106.111	0	194.029	28.6225	0
b1333	2.34284	1.85481	0.835308	0.718114	0.510134	4.76856	1.6683	20.2822	17.4812	27.696	15.0401	71.1348	6.35013	0
b1334	22.0392	22.2951	5.82059	9.00712	2.01434	41.1249	8.04066	27.0991	29.1901	14.4743	0	88.3157	23.9465	2.53432
b1335	0	2.6477	2.20132	1.38781	0.336094	2.36551	2.38146	9.56223	8.91657	9.12354	0	8.83552	0	0
b1336	0.321521	0.169698	0.416851	0.0788407	0.210026	0.307961	0.457901	0.66394	0.442221	0	0	0.351138	0.102525	0
b1337	0	0.0905952	0.222542	0.19642	0.274083	0.328818	0.162971	0.327187	0.755473	0	0	0.504201	0.218938	0
b1338	0	0	0	0.0632608	0	0.0370656	0.0459268	0.368818	0.10645	0	0	0.335184	0.370193	0
b1339	1.24608	0.246628	0.323107	0.101851	0.135662	0.417734	0.295771	1.48451	1.1997	0	0	4.05911	0.198672	0
b1340	2.61518	13.1126	15.9357	5.55768	6.9281	14.7788	12.7252	6.02344	8.09306	0	0	3.69319	0.416958	0
b1341	0.417683	2.1494	1.67873	0.955926	0.454735	2.72046	2.42898	1.45964	1.43621	0	0	4.97054	0.133189	0
b1342	0	0.516664	0.217569	0.182887	0.0811998	0.642942	0.663874	1.24397	2.23117	3.30635	0	7.43616	1.78372	0.578912
b1343	0	0.674789	0.142078	0.656865	0.238615	1.71442	0.650289	1.85678	2.11015	0	0	3.10894	0	0
b1344	7.1822	3.63279	1.47435	1.27195	0.999136	6.01938	3.19646	8.4614	8.31433	17.6885	0	10.2555	1.90853	3.0971
b1345	0	0.494507	0.377914	0.0680727	0.211564	2.23356	0.938984	1.98436	1.37456	4.92264	0	0.658632	1.32784	2.15478
b1346	0	0	0	0	0	7.08652	0	17.6284	10.176	0	0	0	0	0
b1347	0	0	0	0	0	0	0	0	11.0935	0	0	10.6311	0	0
b1348	0	0	0	0	0	9.42181	0	7.81257	0	0	0	3.7044	0	0
b1349	0	0.0967428	0.190114	0.179785	0.266074	0.491583	0.261045	0.232926	1.00842	0	0	0.938774	0.233794	0
b1350	0	0.138263	0.113211	0.0713736	0.0253512	0.0836381	0.0829065	0.305152	0.312263	0	0	0.328842	0.055689	0
b1351	0	4.97803	6.52172	0	0.912748	3.61358	4.47747	13.9831	3.45932	0	0	1.89435	0	0
b1352	0	0	0	0	0	0	0	10.7357	13.9436	0	0	2.54521	0	0
b1353	0	0.226678	0.222728	0	0	0.49364	0	1.09154	0.708848	0	0	0.711648	0	0
b1355	0	0	0	0	0	43.2446	0	71.7169	124.195	0	0	68.0104	0	0
b1356	1.80873	15.9903	4.22103	6.80067	0.262558	18.5372	2.57595	47.1188	41.0476	0	0	104.353	1.15352	0
b1357	0	1.11269	1.09331	0	2.44822	0.807711	4.00323	10.7161	6.95906	0	0	3.1757	8.06701	0
b1358	2.37331	1.87893	0	0.969938	0.861281	0	0.845	2.26194	1.95855	0	0	1.25127	2.27037	0
b1359	0	0.0891052	0.0875525	0.165591	0.147041	0.064682	0.320581	0.750881	0.835928	0	0	0.610348	0.646011	0
b1360	0	0	0	0	0	0.079128	0.294135	0.787356	0.22725	0	0	0.093333	0.526861	0
b1361	0	0.348398	0.513491	0.323728	0.287463	0.885165	0.940096	1.88738	0.726323	0	0	0.92773	1.68392	0
b1362	0	4.22211	0	0.653857	0.580609	5.36349	0.949389	13.9776	5.50127	0	0	0.797019	5.1017	0
b1363	0.679772	1.0315	0.57286	0.694533	0.246691	2.5393	0.766422	2.53751	2.47764	0	0	3.32795	0.108381	0
b1365	0	6.31789	4.13854	3.91368	3.47526	10.7011	3.7884	15.2115	17.5616	0	0	13.8243	0	0
b1366	0	5.41755	3.38746	1.83052	1.35455	2.50258	3.10087	6.52187	6.16048	0	0	2.28505	0	0
b1368	0.527064	0.417273	0.136667	0.344645	0.114764	0.908703	0.25021	0.753497	0.869909	0	0	0.475411	0	0
b1370	0.561672	0.222336	0.145641	0.0459095	0.081533	0.161395	0.266639	0.0892193	0.540768	0	0	7.00133	0	0
b1372	0.131893	0.104419	0.0854994	0.0431222	0.06701	0.101064	0.203491	0.293309	0.362811	0	0	0.268216	0.0420574	0
b1373	0	0.498552	0.163288	0.102944	0.182824	0.241268	0	1.20036	1.21258	0	0	0.42687	0.40161	0
b1374	0	1.58874	0.780527	0.393664	0.262173	1.49926	0.285797	3.2514	2.98091	7.11689	0	3.5368	0	0
b1375	111.314	3.67195	3.60797	0	0	0	0	101.67	114.826	0	0	460.071	0	0
b1376	8.87746	4.0998	2.58966	2.90247	2.73841	8.0779	5.00453	13.7489	12.2101	13.1182	0	23.7365	0	0
b1377	0	0.12257	0	0.151855	0.0337108	0.31141	0.165368	0.663998	0.319409	0	0	0.489752	0	0
b1378	1.50442	0.645149	0.520129	0.543106	0.627854	0.948642	0.848096	1.37409	1.46568	1.48205	0	12.3272	9.39461	3.37342
b1379	16.6132	73.2784	67.6938	32.0079	27.7332	149.123	103.372	85.1998	82.2592	28.0562	60.9429	6.97138	3.78395	0
b1380	9.4323	3.4409	1.79838	0.816321	0.56379	5.63327	5.86057	8.54902	7.55498	3.27954	0	3.15512	1.94618	0
b1381	0	1.4054	1.35864	0.968883	0.648375	1.28346	1.56991	1.09154	1.22867	0	0	5.53791	0.493022	0.711166
b1382	0	14.4662	7.10707	4.48062	0	73.5077	19.5174	78.3677	82.9356	0	0	99.09	34.9599	170.196
b1383	5.32657	0.702835	0.690588	0	1.15982	6.12231	1.89649	18.6143	12.4545	31.4841	0	58.7739	3.39703	16.5378
b1384	0.625888	0	0.162292	0.30695	0.0454273	0.539542	0.297124	1.19304	0.946932	0	0	1.06067	0.199581	0
b1385	0.328466	0.216704	0.38327	0.187935	0.214562	0.25169	0.389827	0.469579	0.451773	0	0	0.494789	0	0
b1386	0.202857	0.267668	0.210403	0.16581	0.132511	0.155441	0.240753	0.418899	0.362713	1.19904	0	0.412528	0.0646862	0
b1387	0.228609	0.0301648	0.0296392	0	0.0497778	0.0656904	0.135658	0.254196	0.157215	0	0	0.103311	0	0
b1388	0	0	0.0782822	0	0.043824	0	0.0716593	0.383643	0.166093	0	0	0.0909539	0.385073	0
b1389	0	0	2.58107	0	1.44493	0.953419	0	12.6492	0	0	0	0.374858	6.34818	0
b1390	0.826122	0.109006	0	0.202575	0.179881	0	0	1.31226	0.340875	0	0	0.093333	0.526861	0
b1391	1.65557	0	0	0	0.120163	0	0	1.05192	0.227708	0	0	0.498779	1.05585	0
b1392	0	0	0.0648379	0.0408768	0.14519	0.383207	0	0.71495	0.137568	0	0	0.546166	0.31894	0
b1393	0	0	0.205529	0	0	0.0759201	0.18814	1.13315	0.436074	0	0	0.208948	0	0
b1394	0	0.201024	0.197521	0.311316	0.165865	0.145924	0.452025	0.726004	0.838168	0	0	0.286868	0	0
b1395	0	0.0459898	0.0451884	0.0569777	0.0505948	0.0333842	0.165461	0.442916	0.431447	0	0	0.236264	0	0
b1396	0	0	0	0	0.344512	0	1.40833	1.88495	2.28498	0	0	0.715013	0	0
b1397	4.72428	0.170008	0.167046	0.0351044	0.124688	0.287956	0.407768	0.272884	0.354424	0	0	0.420519	1.64341	0
b1398	0.385886	0.203669	0.30018	0.0630824	0.0840235	0.184806	0.457973	0.796853	0.583823	0	0	0.784734	1.2305	0
b1399	0.58571	0.61827	0.0759371	0.33512	0.467623	0.673209	0.834151	2.51201	0.644469	0	0	3.81591	3.73537	0.606165
b1400	0	0.635495	0.780527	0.688912	0.436955	0.691964	1.42898	2.48637	3.14651	0	0	5.57726	6.52704	0
b1402	6.88477	6.60682	4.13846	2.96718	3.22534	5.81507	4.60542	13.1234	14.7205	11.0985	0	4.19553	12.5736	2.59099
b1403	7.07901	0.467034	1.83558	1.44655	2.31209	5.42436	4.20072	11.8069	18.9861	62.7637	0	12.5297	57.5618	0
b1404	1.82076	1.80186	1.88849	1.04177	1.58583	3.22635	3.18733	7.15822	6.94939	2.69053	0	9.92527	1.01605	0.471088
b1406	0	0.266003	0.435613	0	0.195092	0	0.0797518	0.747194	0.369699	0	0	2.98615	0.642839	0.695453
b1407	0	0.0263374	0.0776353	0.0652598	0.0579491	0.24854	0.118445	0.126824	0.301987	0	0	0.368326	0.127297	0
b1408	0	0	0	0.0942692	0	0	0.273755	0.916002	0.634512	0	0	0	0	0
b1409	0	0	0.082275	0	0	0	0.150629	0.907224	0.174564	0	0	0.119491	0	0
b1410	0.544539	0.215554	0.282398	0.111273	0.256899	0.156472	0.258506	0.432489	0.337032	0	0	0.471657	0.17364	0
b1411	0.787311	0.0519424	0.306224	0.193058	0.200002	0.64099	0.327036	1.06302	0.541434	0	0	0.667111	0.251054	0
b1412	0	0.456539	0.598112	0	0.167418	0.773276	0.547509	1.6488	2.69668	6.81703	0	6.12406	0.735533	0
b1413	1.01156	0.652544	0.510024	0.303169	0.244733	0.861246	0.72032	1.39258	1.00483	2.65739	0	9.90459	3.76324	2.44275
b1414	1.49032	0.393292	1.44915	0.365443	0.378588	1.35609	0.707489	0.946923	1.84481	8.80893	0	8.30635	3.08897	0
b1415	9.66076	0.318682	0.313129	0.169209	0.175296	0.760094	0.696119	0.931705	1.3762	0	0	10.9015	3.19061	0.357077
b1418	2.9223	2.31356	1.32606	0.95544	0.742357	1.39952	0.693642	6.26663	7.2348	17.273	0	19.424	4.65925	0
b1419	0	57.8714	16.2466	20.4852	22.7379	222.049	59.4883	199.052	206.824	0	0	165.169	159.835	0
b1420	66.6963	1425.68	1556.49	828.638	1127.92	657.999	593.669	381.4	532.059	0	0	414.434	21.2678	0
b1421	0.295171	0.389475	0.612301	0.241264	0.107118	0.706805	0.700623	0.890846	0.487174	0	0	1.05601	0	0
b1422	1.21835	0.241139	0.157958	0.0995841	0.0442141	0.700177	0.144594	0.483823	0.502715	0	0	1.39939	1.554	0.630448
b1423	0.375304	0.049521	0.0973161	0.122705	0.0272398	0.215685	0.0890829	0.715386	0.258097	0	0	1.38509	0	0
b1424	2.6282	1.23302	1.55228	0.644464	0.805414	2.06982	1.8715	2.36571	2.45005	3.45215	0	12.7348	5.40088	1.5111
b1426	451.402	8.50886	33.4424	2.63545	11.7011	37.0598	72.706	66.5817	57.6512	0	0	310.846	185.067	0
b1427	7.07901	0.934068	0.917792	0.462894	0.411039	1.35609	2.85649	3.8232	4.86824	8.36849	0	15.9953	0.90293	0
b1428	0	0.741121	0.655386	0.275457	0.203833	0.215194	0.666598	1.33829	1.31329	0	0	1.84023	0	0
b1429	0	0.510406	0.644801	0.316176	0.441189	1.27031	1.63958	2.19446	2.20414	0	0	1.83132	0.704844	0
b1430	2.38711	13.229	3.55911	11.3167	1.38606	15.4334	4.67452	6.63569	5.90982	7.05483	0	14.2935	1.14179	0
b1431	0.97991	1.42228	1.3975	0.32038	0.640102	4.12977	3.14001	4.98095	4.7172	0	0	18.2668	3.43717	0
b1432	2.74026	0.723149	0.355274	0.410632	0.762411	0.568683	0.867245	2.75677	2.13574	2.69951	0	8.25566	0.873803	0
b1433	0	0.409537	0.517373	0.181209	0.386181	0.339755	0.368357	0.774744	0.54886	0	0	1.03526	0	0
b1434	2.8612	0.566299	0.556431	0.233867	0.415335	0.959186	1.01871	2.04521	1.57412	0	0	5.87239	8.6675	0
b1435	0.719479	1.86704	0.590775	1.56822	0.435168	2.13632	0.825421	1.52382	1.02256	2.83512	0	6.17764	19.0422	0.744606
b1436	58.5209	7.72177	3.79361	11.9583	2.12374	36.4343	13.8906	13.9437	52.3183	0	0	12.1211	18.6609	0
b1438	0	0.324407	1.59377	0	0.35689	1.88391	1.16715	3.51481	0.676307	0	0	10.8328	1.56796	0
b1439	1.77434	0.280947	0.184034	0.116024	0.231809	0.509853	0.168464	1.07102	0.73213	2.09755	0	2.57925	0.452636	0.367262
b1440	0	0.120928	0.178232	0.262186	0.199556	0.395022	0	0.873473	0.252105	0	0	3.43412	0	0
b1441	0	0.496376	0.348376	0.219632	0.234034	0.360323	0.0637805	0.426828	0	0	0	1.09288	0.171368	0
b1442	1.18665	1.01776	1.38465	0.581963	0.818217	1.36393	1.19708	1.22522	0.734457	0	0	0.670325	0	0
b1443	1.50672	0	0.390693	0	0.0546795	0.216477	0.357639	0.598343	0.207235	0	0	1.39018	0.240229	0
b1444	0.349432	1.65986	0.815468	0.571231	0.557963	2.24245	1.36854	1.49866	1.48989	0	0	2.59238	0.222851	0
b1445	313.278	49.6041	32.4932	10.2426	4.54758	42.0092	52.0522	89.5733	163.736	0	0	51.9102	0	0
b1446	194.8	1314.56	90.1991	702.86	56.5548	1641.94	128.806	906.193	922.438	328.977	0	443.303	8.87385	28.8004
b1447	4.10582	14.3566	3.72624	6.87977	3.42704	21.0397	4.14191	17.9353	22.871	0	0	6.49411	3.27312	0
b1448	1.52633	1.00699	0.197888	0.374273	0.221564	2.63152	0.724585	6.30373	7.34761	0	0	9.82911	2.43355	0
b1449	0.521044	0.275005	0.20266	0.0851773	0.151271	0.399255	0.061838	0.662125	0.716645	0	0	1.43241	0	0.539241
b1450	0.986977	0	0	0	0	0.378141	0.702812	0.940664	0.542996	0	0	2.00711	0.314723	0
b1451	0.443154	0.175421	0.287274	0.126778	0.0964932	0.297125	0.236673	0.457556	0.396185	0	0	0.609141	0.918523	0
b1452	0.505643	0.733911	0.852235	0.12399	0.587198	1.2108	2.64045	1.04415	1.25183	2.98875	0	12.4726	12.254	1.56991
b1453	6.24085	2.99051	6.60076	0.724893	2.00258	4.12143	9.16092	0.991334	1.67156	1.94149	0	0.816402	0	0
b1454	0	0.441652	0.578608	0.18239	0.161958	0.213732	0.132414	0.708906	0.460366	0	0	0.588234	0	0
b1455	0	0	0	0	0	0	0	18.4149	0	0	0	1.45526	0	0
b1456	0.456456	0.210801	0.295897	0.0932736	0.115955	0.0874411	0.352122	0.217519	0.313905	0	0	0.259577	0	0
b1457	1.76216	0	0.228463	0	0.383695	0.168784	0.209134	2.79911	0.969469	0	0	0.862696	0.561909	0
b1459	0	0.067383	0	0.0417411	0	0.0978274	0	1.13566	0.210715	0	0	0.231066	0	0
b1460	0	0.671855	0.240054	0.302682	0.10079	0.53204	0.219744	1.17645	1.59165	2.73603	0	0.435799	0	0
b1461	0	25.7036	28.8637	20.4716	14.1387	66.6372	46.2381	61.8863	42.103	0	0	25.152	0	0
b1462	0	1.5237	1.16445	0.629247	0.558756	2.33502	1.37048	3.05716	1.58826	0	0	0.67647	0	0
b1463	2.06669	0.454496	0.535892	0.337851	0.200002	0.0659843	0.654071	1.75085	1.51602	4.07191	0	0.311319	0.659018	0
b1464	1.2751	0.420621	0.578608	0.312669	0.185095	0.366397	0.756651	2.43053	0.789199	0	0	7.32292	0.406599	0
b1465	0	0	0.494032	0	0.207427	0.273735	0.226118	1.05925	0.786148	0	0	0.645752	0	0
b1466	0.920589	0.121471	0.238708	0.0752463	0.0668169	0.0881763	0.218513	0.584927	0.253236	0	0	0.277348	0	0
b1467	0.634104	0	0.123317	0.15549	0.0460237	0.0607361	0.112884	0.302175	0.130822	0	0	0.513415	0.1011	0
b1468	0	0.108631	0.121987	0.0480662	0.0682906	0.146447	0.153541	0.26155	0.258821	0	0	0.535927	0.0750071	0
b1469	0	0	0.0934713	0.0589286	0.0784908	0.103582	0.171127	0.11452	0.19832	0	0	0.108602	0	0
b1470	0	0	0	0	0	0	0	0.758144	1.31291	0	0		0	0
b1471	0	0	0	0	0	0.0556247	0.0689227	0.553488	0.399375	0	0	0.20025	0	0
b1472	0	0	0	0	0	0	0	4.48315	3.88183	0	0	0.892631	0	0
b1473	0.649656	0.857214	0.926505	0.424808	0.282914	1.24451	0.308407	1.85751	1.87643	3.83997	0	3.93894	1.0358	0
b1474	2.64135	2.7301	1.6742	1.11546	0.713589	4.94745	3.63982	17.6917	18.6691	23.4186	3.76809	73.4922	7.67394	2.58173
b1475	17.4578	25.1684	12.7421	24.4168	8.02497	26.3829	24.6327	37.4883	31.4818	64.9711	0	51.086	8.24723	8.03002
b1476	42.6843	11.6666	9.61864	12.2942	5.23719	35.4329	36.0638	55.2104	38.4398	108.127	52.1936	69.5415	0	2.10357
b1477	31.6262	38.9485	9.56745	30.1588	4.5909	97.9455	26.274	68.6572	57.9984	124.624	0	43.6706	10.0848	10.9103
b1478	1.61859	0.284762	0.76945	0.0881993	0.313275	0.568453	1.34467	2.22826	1.18731	0	0	4.1246	3.78495	0
b1479	7.08879	2.58159	5.73493	1.27472	2.77834	6.62686	11.3744	5.99045	5.57696	5.02803	7.28116	17.9182	7.143	0
b1480	440.256	69.7096	57.0791	28.7882	12.7816	50.6026	31.35	223.785	193.769	0	0	1843.65	0	0
b1481	0	4.88116	0	3.02368	0	3.54326	0	35.2569	35.6159	0	0	0	0	0
b1482	4.5119	26.4926	6.14215	13.4608	3.92971	10.1558	3.21286	8.242	7.4468	0	0	25.1473	0	0
b1483	0.606473	0.560165	0.314517	0.297428	0.220091	0.871343	0.431861	1.05969	1.41805	0	0	0.319749	0.19339	0
b1484	0	0.147017	0.0722279	0.0910715	0.0404346	0.426883	0.46282	0.265479	1.45585	0	0	0.272738	0	0.576556
b1485	0	0.0837341	0.246825	0.0518699	0.138178	0.364698	0.225943	0.504013	1.83293	0	0	0.501863	0	0
b1486	0.531155	0.140171	0.137728	0	0.077103	0.152626	0.0630379	0.0843717	0.29222	0	0	0.0600084	0	0
b1487	0	0.416418	0.245497	0.103182	0.0687171	0.120912	0.262182	0.15039	0.434063	0	0	0.273351	0	0
b1488	0	0.163181	0.160337	0.303252	0.26928	0.236907	0.146772	0.392888	0.34019	0	0	0.232864	0	0
b1489	0.572906	0.0503962	0.173313	0.0312185	0.0554425	0.0365829	0.135986	0.303346	0.367722	0	0	0.388352	0.243581	0
b1490	0.362385	0.0478164	0	0	0.0526043	0.0694203	0.129025	0.115127	0.0996851	0	0	0.259295	0.693335	0
b1491	0.383722	0.556949	0.248747	0.345008	0.167105	0.441046	0.273243	0.487621	1.37221	2.26809	0	2.91902	0.978877	0
b1492	0	0.084255	0.24836	0.0782889	0.115864	0.152903	0.151566	0.456434	0.526951	0	0	0.529032	0	0
b1493	0	1.50619	2.77491	0.962185	1.94181	0.956686	1.60875	1.92655	1.42283	0	0	0.698551	0.113749	0
b1494	0.161266	0.106394	0.188173	0.0790884	0.140457	0.247143	0.267948	0.28178	0.44361	0	0	1.36645	0.359966	2.83726
b1495	0	0.53589	0.526552	0.221308	0.22459	0.370482	0.298384	0.399365	0.345799	0	0	0.684618	0.493358	2.20167
b1496	0	0.113181	0.0741392	0.0233704	0.0207523	0.0821587	0.0678667	0.227087	0.117977	0	0	0.0861402	0.54704	0.591813
b1497	0	0	0	0.0369602	0	0	0.0536656	0.430965	0.37316	0	0	2.2478	0	0
b1498	0	0	0	0.0234193	0	0.109774	0.0340044	0.18205	0.157632	1.69355	0	42.5992	0	0
b1499	0	0	0	0	0	0	0	0.254763	0.55148	0	0	0.271796	0.255713	0
b1500	0	0	0	0	0	0	0	30.0897	13.0269	0	0	0	0	0
b1501	0.202257	0.0533753	0.131113	0.0165319	0.0587198	0.0581182	0.144025	0.192767	0.19473	0	0	0.396075	0.064495	0.209321
b1502	0	0.0814676	0	0.0504659	0	0	0	0.0980742	0.254759	0	0	0.302268	0.196879	0
b1503	1.61647	0	0.209575	0	0.117324	0.154829	0.191844	0	1.11165	0	0	0.182624	0	0
b1504	0	0	0	0	0	0	0	0.464195	0.6029	0	0	0.660306	0	0
b1505	0.45671	0	0	0.0746604	0	0.174979	0	0.580372	0.188448	0	0	0.553916	0	0
b1506	0	5.85496	5.75294	7.25383	6.44122	17.0006	10.5324	28.1938	30.5153	0	0	1.67104	14.1494	0
b1507	0	1.26225	0.694545	0.625533	0.333275	1.39274	0.681197	1.64112	1.10522	2.26175	0	2.43533	0.610088	0
b1508	0	7.93816	5.84988	2.45869	5.45813	17.2871	7.13994	14.3344	14.4804	0	0	37.9488	38.3677	0
b1511	0	0.363055	0.317093	0.19991	0.332841	0.292827	0.507965	0.728436	0.71483	0	0	1.11678	0.682408	0.316397
b1512	0	0.307818	0.0756135	0.190681	0.16932	0.446893	0.276865	0.555847	1.12301	0	0	1.25191	1.30181	0
b1513	0	0.0421275	0.0827868	0.0260963	0.0231729	0.0611612	0.0757828	0.659293	0.570864	0	0	0.613196	0.101808	0
b1514	0	0.139091	0.0683337	0.172323	0.153018	0.0504835	0.375314	0.418609	0.144985	0	0	0.218336	0	0
b1515	0	0.14583	0.143289	0.0903361	0	0.158577	0.459082	0.52667	0.304019	0	0	0.145673	0.176211	0
b1516	0	0	0	0.0868301	0	0.0510788	0.0630379	0.253115	0.0730551	0	0	1.4402	0	0
b1517	0	0	0	0	0	0.188466	0.0778408	0.312553	0.18042	0	0	0.987998	0	0
b1518	0	1.24134	2.43943	0	0	2.70329	0	5.97753	3.88183	0	0	18.0687	0	0
b1519	0.806645	0.745052	0.104581	0.0659329	0.234187	0.386313	0.2872	1.28132	0.998515	0	0	4.13134	0.514439	1.66963
b1520	1.23483	0.570273	0.480288	0.353262	0.134438	1.12362	0.366378	1.56919	1.35872	0	0	1.16257	0	0
b1521	0.341583	0.090143	0.132858	0.05584	0.123961	0.098153	0.243236	0.976662	0.563776	0	0	8.25849	0.653535	0
b1522	5.88227	0.310464	0.838899	0.52888	0.76849	0.845128	1.11698	2.61625	3.15529	3.47688	0	2.87977	6.18986	2.43508
b1523	7.46507	16.7451	9.67844	7.01699	5.14728	13.2279	10.6315	23.7159	25.6687	44.1243	0	3.79522	49.989	15.4516
b1524	2.42589	1.04031	0.550404	0.594857	0.264109	1.97504	1.36756	3.66076	2.08536	3.58473	0	3.69996	9.86288	2.51062
b1525	0	0.190258	0.280414	0.117857	0.183145	0.345273	0.342253	0.458081	0.7437	0	0	3.81463	2.41389	1.1192
b1526	0.649656	0.342886	0.168455	0.424808	0.0471524	0.560031	0.154204	1.44473	1.69772	0	0	2.6912	0.621479	0
b1527	0	0	0.0614687	0	0.0344115	0.0454118	0.0562683	0.602488	0.586887	0	0	0.26782	0.302367	0
b1528	0.872651	1.09388	0.395987	0.570624	0.538369	1.42094	0.517836	1.24755	1.14023	2.57902	0	1.36383	0	0.451564
b1529	0.986977	2.9953	1.53554	1.21009	1.14617	5.29397	2.22557	3.76265	4.88697	5.8338	0	9.47801	0.94417	0
b1530	0	1.46421	0	0.362809	0.483248	2.33834	1.05359	4.93552	3.96827	0	0	20.5605	2.83081	0
b1531	0	2.42579	1.19176	1.25223	0.667171	8.80447	2.54551	4.86711	10.5357	18.1109	0	43.6171	3.9082	0
b1532	0	23.3396	13.7598	11.5664	2.56767	94.8773	54.5811	61.814	68.1201	209.104	0	62.616	33.8424	0
b1533	1.895	2.16704	1.47411	0.671197	0.55016	2.17809	2.77377	2.00675	2.43262	0	0	1.57	1.61138	0
b1534	0.875442	0.115514	0.227002	0.357781	0.15885	0.293482	0.155848	0.695302	0.84286	0	0	1.61545	0	0
b1535	1.28107	2.28198	0.747406	1.04711	0.185961	4.6014	0.608154	1.72969	2.29058	0	0	4.12485	0.204251	0
b1536	0	0.378853	0	0	0	0.550023	0	0.912159	1.18472	0	0	1.94629	0	0
b1537	0	0.402795	0.791553	0.249516	0.664691	0.584783	1.81146	2.42451	3.56884	0	0	0.632282	0.486709	0
b1538	0.685828	0.663625	0.859536	0.242916	0.580741	0.810181	1.30232	1.16204	1.41493	0	0	7.51585	4.95707	0.473187
b1539	3.30449	4.57825	1.39238	2.02575	1.01933	11.1571	2.8433	14.8285	13.4077	9.76604	0	38.3599	10.5372	0.854973
b1540	3.75819	4.21506	2.31443	1.9199	1.15928	9.53918	3.34519	19.7001	23.1314	5.55346	24.1261	43.3082	2.69639	0
b1541	744.364	265.767	221.398	68.0001	63.5605	247.443	249.436	507.733	475.766	1035.24	0	461.705	0	0
b1542	0	0.13421	0.263742	0	0.12304	0.194847	0.281667	0.538558	0.512954	0	0	0.319202	0	0
b1543	0	0.209578	0.102963	0.0649127	0.0288204	0.266234	0.0942521	0.315374	0.163844	0	0		0	0
b1544	111.314	3.67195	3.60797	0	0	0	0	97.2499	110.999	0	0	422.343	0	0
b1545	0	1.58874	0.780527	0.49208	0.174782	1.49926	0.285797	3.2514	3.14651	7.11689	0	3.71817	0	1.2461
b1546	0	0.498552	0	0.102944	0.182824	0.241268	0.298947	1.20036	1.21258	0	0	0.711449	0.80322	0
b1547	0	0.303932	0.223977	0.0470685	0.250774	0.496409	0.546741	0.365887	0.396014	0	0	0.238547	0	0
b1548	0	0	0.16635	0.104875	0.279378	0.245791	0.913656	0.815242	0.176474	0	0	0.444954	0	0
b1549	0	0.672993	0	0.416892	0	0.732794	0	2.02545	1.40302	0	0	3.93757	0	0
b1550	375.934	173.614	8.12329	81.9407	0	276.061	29.7441	1114.69	766.973	0	0	2100	0	0
b1551	0	0	0	0	0	7.18557	0	11.9166	20.6364	0	0	64.9789	0	0
b1552	0	15.2967	5.01006	0	0	3.70133	0	85.9361	47.8348	0	0	283.776	0	0
b1553	0	0	0	0	0	0	0.982426	0.525962	0.227708	0	0	0.311737	0	0
b1554	0	0	0.562309	0.236337	0	0.69237	1.20105	0.918582	0	0	0	0.272221	0	0
b1555	0	0.867634	8.52516	0.537465	0	5.03856	7.02351	4.17798	0.904399	0	0	2.22866	0	0
b1556	0	0	52.7571	6.04736	0	17.7163	39.513	23.5046	0	0	0	5.57245	0	0
b1557	13613.3	1025.04	2023.95	982.697	1565.33	1137.39	2871.28	10659.3	10410	1311.94	0	5091.83	0	0
b1558	231.858	122.374	120.242	34.7443	70.1184	140.651	206.379	564.723	589.962	456.821	0	302.695	0	0
b1559	0	0.75394	1.16412	0.467036	0.473961	1.32913	0.968754	1.29661	1.23497	0	0	0.368879	0	0
b1560	0	0.541759	0.865019	0.167799	0.484255	0.983166	2.13186	1.05981	1.27061	0	0	0.173949	0	0
b1561	0	15.945	7.8336	6.58488	4.38541	34.7238	0	6.39844	11.0805	0	0	9.86011	0	0
b1562	225.059	316.76	262.61	214.616	147.014	567.66	178.068	548.162	340.501	443.424	0	169.51	191.376	0
b1563	19.908	17.0745	9.03374	14.645	2.88987	72.4598	16.5389	53.7592	31.4887	0	0	61.4768	28.5668	0
b1564	25.0875	33.1027	22.7681	24.607	1.82087	177.818	35.7289	139.477	69.0109	0	0	91.643	71.9983	0
b1565	0	2.86216	8.43686	1.773	1.57438	4.15532	10.2974	13.7824	2.98344	0	0	0.544586	0	0
b1566	4.94451	18.9203	13.4622	6.46641	2.87101	11.3664	18.1914	16.4937	9.52097	58.4518	0	4.28273	0	0
b1567	0	10.4627	0	0	0	30.3798	18.8213	75.5728	10.9061	0	0	8.54735	25.2848	0
b1568	0	2.48269	2.43943	0	0	3.60439	1.11652	11.9551	6.46972	0	0	1.78526	0	0
b1569	0	7.72177	0	0	0	11.2106	0	23.2395	4.02449	0	0	3.30576	0	0
b1570	0	3.08597	1.01073	3.18606	0.18861	8.71159	1.54204	16.0984	20.0152	30.7198	0	149.924	0.828638	0
b1571	0	0	0	0	0	28.7423	8.9034	23.8331	30.9546	0	0	2.82517	0	0
b1572	0	25.0178	0	0	6.8807	27.2408	11.2511	30.1175	39.1168	0	0	17.8506	0	0
b1573	0	4.66793	9.17317	2.89159	2.56767	23.7193	25.1913	28.0973	48.6572	0	0	18.6516	0	0
b1574	0	0	0	0	0	0	0	0	0	0	0	0	50.1244	0
b1575	0	0	0	0	0	0	0	0	14.5564	0	0	3.98561	0	0
b1576	0	0	0	0	0	4.88833	6.05697	0	0	0	0	5.76588	0	0
b1577	0	0.0807391	0	0.100029	0.0444118	0.117218	0.0726205	0.291592	0.336641	0	0	0.570449	0	0
b1578	5.04401	6.3893	3.79294	3.05089	3.66097	5.50766	4.90875	9.93513	10.1288	0	0	5.23549	0	0
b1579	0	0.228832	0.337267	0.141752	0.283213	0.332221	0.411644	0.757564	0.655953	0	0	0.459778	0	0
b1580	0	0	0.138265	0.0435842	0.0387017	0	0.0632835	0.508203	0.733397	0	0	0.261049	0.170032	0
b1581	0	0.112282	0.110325	0	0.123525	0.163012	0.201983	0.337924	0.526678	0	0	0.480689	0.271347	0
b1582	0	3.51418	2.07176	1.74151	0.773211	3.06115	1.89649	18.6143	8.79141	0	0	6.2184	0	0
b1583	0	0	0	2.55316	1.29551	2.13706	3.17755	8.50585	16.5712	26.3758	0	105.87	39.8419	23.0908
b1584	1.3202	2.61299	2.05397	2.05028	0.95821	1.64388	1.88019	6.08155	5.26584	7.80341	0	24.0136	12.6294	6.83154
b1585	0.890634	0.822628	1.15471	1.16477	0.646428	1.27961	1.69122	3.25389	3.06245	0	0	9.99506	1.13601	0
b1586	0	1.90811	2.81229	0.590998	3.14875	3.46277	4.2906	17.228	1.98896	0	0	96.664	0	0
b1587	0	0.472826	0.366779	0.323728	0.410661	0.650325	0.581964	0.419417	0.570682	1.11477	0	2.05973	0.06014	0
b1588	0.18886	0.0747598	0.0244857	0.0926215	0.150784	0.361791	0.201727	0.539995	0.701349	0	0	8.3214	0.060223	0
b1589	0	0.147217	0	0	0.161958	0	0.794484	0.886132	0.767277	0	0	11.3445	0	0
b1590	8.14379	0.89547	1.49577	0.499237	1.1329	1.30005	1.85248	3.23402	2.61356	4.01134	0	8.99617	0.649214	0
b1591	5.62442	1.6327	1.16673	0.643613	1.14303	3.01684	4.13857	11.257	6.4981	0	0	10.0822	1.07609	1.16417
b1592	0.407728	0.753191	0.792928	0.533225	0.739829	1.71834	0.967792	4.46885	3.25258	2.40999	0	0.829153	0.520059	0
b1593	3.68235	3.88706	3.46127	3.16034	3.20721	5.64328	4.15174	17.5478	13.1683	48.9725	23.6393	85.2152	4.4033	0
b1594	2.53707	3.29184	1.48019	3.04147	1.04347	3.15909	1.60588	5.91071	7.21161	4.99868	0	5.7804	1.61802	0
b1595	0	0.168248	0	0.260558	0.185095	0.366397	0.226995	0.405089	1.92915	0	0	1.15246	0.406599	0
b1596	1.63579	1.99652	2.01475	1.5376	1.57312	1.80182	2.03844	0.649595	1.74364	2.41719	0	4.86658	0.260806	0
b1597	0	0.909114	2.67982	0	0.500073	1.31986	0.817699	4.37772	2.84291	0	0	8.04348	0	0
b1598	0	1.23127	0.837565	0.938737	0.833575	1.1688	2.81125	2.96452	5.03505	0	0	9.29892	0.457779	0
b1599	5.12869	4.73708	2.65973	2.09602	1.86122	12.281	10.3475	17.1081	16.2242	30.3145	0	5.9874	0	0
b1600	0	2.33517	3.67117	0.578618	1.5414	8.81459	4.62079	7.30906	7.30236	0	90.8889	22.9267	0	0
b1601	1.56911	0.621125	0.678114	0.983282	0.721282	1.45283	0.931114	3.73869	3.09335	0	0	1.18182	0.166783	0
b1602	4.32572	3.04413	2.47699	1.85625	1.38667	5.9387	5.90387	6.69944	6.49498	4.26139	0	10.4665	81.2677	36.9335
b1603	1.60009	2.57579	2.07451	0.941664	0.464541	3.7089	3.26628	3.30418	3.78531	7.56621	0	33.0454	72.4526	30.801
b1604	6.49843	1.79287	0.919112	1.11061	0.600294	3.7912	1.40225	8.53951	8.93795	3.49189	0	20.1342	4.33276	1.2228
b1605	1.44954	5.40325	4.88625	2.25115	3.07735	4.02638	3.82773	2.01472	2.49213	6.42593	0	0.504943	2.42667	0
b1606	0.868039	2.29074	2.13828	1.13522	1.51207	3.65829	4.53287	3.44711	4.05927	10.2616	0	3.53047	3.32156	0.898355
b1607	0	3.77862	3.71278	2.3407	2.4249	9.60022	7.36377	9.09773	14.442	0	0	3.23533	1.52194	0
b1608	2.62074	1.03741	1.01933	1.35667	0.824264	2.67756	1.65884	8.88093	9.13158	20.6541	0	27.7003	17.8281	0
b1609	1.17086	3.86235	0.404806	3.03059	0.878146	3.43921	0.787435	8.18342	7.46155	6.92071	0	8.86282	7.96501	0
b1610	0	0.318682	0.156564	0.246764	0.21912	0.925332	0.286637	1.24684	1.99312	0	0	3.8428	1.73283	0
b1611	0.711581	0.234731	0.322897	0.116325	0.0774705	0.306707	0.126677	0.847738	0.391484	0	0	1.94282	0.113453	0.736433
b1612	2.64513	0.232681	0.190522	0.120114	0.149322	0.225206	0.209284	0.79365	0.646776	0	0	11.9093	1.31206	0.304167
b1613	1.77357	0.994591	0.804802	0.906043	0.418363	2.88792	0.89458	3.52156	5.54958	7.8624	0	17.349	7.77631	0.917758
b1614	0.652236	5.24977	1.05703	3.51859	0.757435	8.8399	2.36094	5.12845	4.97883	7.71044	0	51.6183	4.78359	1.35003
b1615	0	0.106646	0.104787	0	0	0	0.0479609	0.192577	0.222329	0	0	0.243499	0	0.41823
b1616	0	0.481992	0.142078	0.298575	0.371178	0.349881	0.346821	0.290122	0.200967	0	0	0.536498	0.465925	0.378044
b1617	0.262857	0.0693674	0.136317	0.0214852	0.0190783	0.201417	0.0623922	0.292276	0.289227	0	0	2.21737	0.335275	0.544074
b1618	4.81622	0.794369	0.624421	0.787328	0.524346	1.96057	1.28608	11.2843	11.2612	0	0	30.2895	1.15183	0
b1619	4.75578	0.418347	0.411057	0.323937	0.345177	1.59432	1.59919	3.02175	1.30822	0	0	17.5815	1.011	0
b1620	0	0.417273	0.546669	0.344645	0.4208	0.706769	0.750629	3.51632	2.39225	3.11535	0	3.67202	0.840339	0
b1621	0.30572	0.242037	0.515276	0.149932	0.310651	0.497805	0.435398	1.26262	1.59786	0	0	2.04934	3.11958	1.58199
b1622	0.444835	2.05434	0.403709	1.05443	0.904018	0.724326	0	1.48386	1.7743	0	0	6.58356	3.82987	1.84148
b1623	4.91389	0.792467	0.707871	0.803294	0.752934	1.83036	1.29597	5.03021	5.78233	12.9088	0	32.672	3.48204	0
b1624	0.519068	0.821885	0.403782	0.551552	0.753485	1.59096	1.23207	3.95768	3.9266	3.06809	0	11.3963	5.13106	0
b1625	0	92.742	76.7376	18.1421	32.2195	492.513	215.126	276.179	447.743	0	0	650.584	94.3687	0
b1626	8.59859	13.0476	6.96753	4.39265	2.96443	27.1786	13.0112	40.634	44.6451	0	0	70.6726	7.54017	0
b1627	3.71008	28.2302	16.6751	8.28888	4.488	17.7681	12.3289	17.2871	10.716	29.2393	0	12.8541	3.94352	2.55977
b1628	3.74391	24.8649	11.6495	9.38452	5.34413	27.4928	14.6629	12.2906	9.26889	14.753	0	12.0313	3.18358	2.58311
b1629	1.6648	2.41636	1.26807	1.25871	0.55885	3.64763	1.67944	2.57836	2.69049	1.23004	0	7.5234	0.199075	0.861473
b1630	3.04511	0.803599	0.526397	0.248899	0.221016	1.65279	0.722793	1.69296	2.02432	0	0	7.60685	0.323671	1.57573
b1631	3.32007	5.25696	2.58268	2.17099	1.68681	5.72409	2.62686	5.09801	5.78415	19.6242	0	14.6286	0.352897	2.29068
b1632	0.920589	5.22324	1.90967	2.33263	2.13814	7.31863	2.18513	7.01912	6.20428	5.44139	0	9.29116	0	1.90548
b1633	2.12737	3.5088	1.51697	1.73885	1.31245	7.43742	2.39854	9.7998	9.65577	12.5744	0	12.0973	0.339184	0
b1634	16.384	6.87468	8.62417	4.87461	5.58905	14.4689	19.0169	23.683	19.7853	29.0526	33.6572	19.8059	1.56734	0.339123
b1635	2.30664	0.760898	0.897167	0.471346	0.502253	1.98843	1.09502	5.86241	3.80707	0	0	7.77451	2.2066	0
b1636	17.3862	3.35291	4.33485	1.69439	3.59157	4.54754	7.61876	19.757	15.0836	23.7153	17.1712	19.441	97.4473	8.99671
b1637	18.0256	4.86262	7.79004	2.48834	4.21566	9.28492	15.0226	17.1797	14.8204	18.9414	20.5719	64.0511	83.1532	6.21837
b1638	0	0.399331	0.915537	0.164913	0.219658	1.15951	0.957805	2.88439	4.02377	5.9628	0	18.3115	93.9313	5.22017
b1639	10.2574	2.03018	3.9896	2.09602	0.744487	4.91239	3.65207	11.4054	15.5188	30.3145	0	6.75996	11.4479	0
b1640	0.477422	0.314976	0.990361	0.429254	0.485122	0.68593	0.509948	1.89591	2.16693	0	0	1.5642	1.9791	0
b1641	26.3677	118.044	49.0808	49.1082	30.7572	195.37	52.3047	112.488	135.998	300.575	96.7258	228.528	95.4911	9.74591
b1642	4.43873	10.5423	3.45288	5.44214	3.38274	23.1708	5.79472	55.7008	44.872	39.3545	0	49.8968	4.95391	0
b1643	0	0	41.1296	10.8041	24.9439	32.9178	53.3373	100.783	58.1769	0	0	25.8848	92.7289	0
b1644	1.3506	0.712841	0.525315	0.275986	0.343096	0.711501	0.641162	2.46718	1.67186	7.9831	0	5.92547	2.36871	0
b1645	0.232889	1.59793	0.332133	1.066	0.354967	0.869959	0.608068	1.36876	1.02501	2.7531	0	2.55218	0.742625	0
b1646	0	1.99176	0.978528	1.85073	0.32868	3.90375	1.61233	7.19331	6.02087	0	0	21.5447	4.81341	3.12442
b1647	0	0.921075	0.740475	0.674309	0.138178	3.09994	0.979085	5.34254	4.45139	3.75094	0	32.1192	2.42828	1.31351
b1648	0	6.62055	9.75778	0	3.64174	7.20884	17.8645	19.9253	10.3516	0	0	44.4044	0	0
b1649	0	1.70267	0	0	0.0851438	1.57307	0.139224	0.745364	0.484042	0	0	2.42977	5.61106	0
b1650	0.968355	0.319434	0.439415	0.237452	0.210851	1.15939	0.574626	1.92274	1.33188	2.86186	12.4329	7.82225	2.31589	2.00435
b1651	7.79587	8.91503	3.0322	2.54885	1.32027	14.4364	4.93451	37.563	31.0951	15.3599	66.7286	121.153	14.9155	8.06813
b1652	3.09484	0.680602	0.267497	0.421606	0.14975	1.67978	0.857031	3.60509	2.97966	0	26.4902	25.9904	4.93435	0
b1653	0.282058	0.210898	0.280361	0.0768487	0.218367	0.315189	0.368224	0.686991	0.581915	1.66718	0	2.19168	0.329785	0.0973029
b1654	159.199	68.5464	57.575	24.3128	32.5358	112.758	96.9555	202.97	221.267	247.629	322.735	149.409	22.7105	0
b1655	2.17623	2.29721	1.78694	1.18586	1.00036	3.05719	2.75496	4.60914	6.38548	0	0	14.5607	2.08184	0.750745
b1656	56.8879	6.52722	5.45146	5.55961	7.00128	17.2942	9.09987	43.2176	38.7817	175.436	63.5127	360.194	31.9425	3.83965
b1657	0.446285	1.47217	0.462886	0.547171	0.485875	1.7526	0.741518	1.77226	1.47317	2.63789	0	2.62184	0.569238	0
b1658	7.40742	4.60775	2.81251	2.55159	2.26575	7.09501	5.58869	10.2536	10.6976	12.5096	0	21.121	14.5097	2.19032
b1659	1.80344	1.90369	2.0264	0.982719	1.30895	2.13043	2.5684	1.90979	1.819	0	15.4365	1.10929	0.766763	0
b1660	3.41441	5.80054	1.93671	6.59336	2.16842	16.9652	4.45748	6.37278	6.80946	2.52272	0	1.14118	0.272193	0
b1661	1.37013	2.16945	1.36188	1.79185	1.29278	4.287	1.8971	6.52919	6.6585	2.69951	11.7276	20.1404	2.47578	0.47266
b1662	4.18962	1.38204	0.95057	1.02734	0.912255	9.63101	2.61045	9.81618	11.0926	6.19097	0	39.6415	2.00395	0
b1663	2.9223	1.54238	1.46814	0.83601	0.477229	2.76406	1.25723	2.43702	3.06474	0	9.37999	3.1227	0.698887	0
b1664	1.63091	1.39878	1.05724	0.933144	0.532677	4.60828	2.51626	3.4326	3.7573	4.81998	0	6.41826	1.30015	0.421968
b1665	0	0	0	0	0	0	0	0	0	0	0	35.9824	0	0
b1666	0	0	0	0	0	0	0	0	0	0	0	20.5614	0	0
b1667	180.762	62.9675	128.428	20.6849	26.7644	137.126	168.191	209.033	233.703	42.7377	0	376.854	2.30562	0
b1668	0.606026	0.0799645	0.35357	0.0743022	0.0439857	0.17414	0.287695	0.770118	1.33365	0	0	1.8372	0	0
b1669	0	0.288682	0.283651	0.178827	0.158794	0.209556	0.346205	0.46337	0.702134	0	0	2.36189	0	0
b1670	0	0.505373	0.695193	0.250447	0.111195	0.586965	0.454555	0.608389	0.632145	0	0	2.07701	0.244263	0
b1671	0	0.387895	0.508181	0.16019	0.497857	0.187717	0.581484	0.933928	0.404331	0	0	2.47247	0.62494	0
b1672	0	0.272241	0	0.0843212	0.224626	0.197621	0.367299	1.14707	0.425665	0	0	2.87487	0.986871	0
b1673	0	0.0877106	0.0861823	0.253555	0.080411	0.0848929	0.210376	0.563146	0.243806	0	0	1.92755	0.141311	0.229316
b1674	0	0	0.423596	0	0	0.208629	0.129253	1.21097	1.04854	0	0	2.74792	0	0
b1675	40.3283	122.389	31.3713	75.8154	23.4164	119.745	19.1448	179.368	166.403	238.372	0	80.4925	12.8597	0
b1676	8.11986	2.14281	1.19005	1.47167	1.66554	5.74852	3.5195	16.5992	14.3728	14.6071	9.06545	222.573	1.23833	1.82683
b1677	66408	9805.46	14546.2	3908.94	7590.63	22318.3	17133.8	43613.9	29186.6	75160.7	75351.6	24661.2	33.7196	27.3596
b1678	1.08764	0.645806	0.705059	0.355601	0.749942	0.781324	1.4199	1.20937	0.747968	0	0	2.86716	0.520231	0
b1679	2.45858	0	0.637508	0.401914	0.71378	0.470978	2.91786	2.73374	2.36707	0	0	13.3326	4.70389	15.2666
b1680	0.84569	0.055794	0.274109	0.207373	0.306903	0.283508	0.501836	0.873173	1.27948	0	0	5.52561	1.48319	3.93851
b1681	0	0.0530097	0.052086	0.0656748	0.0583177	0.11544	0.190718	0.319077	0.331536	0	0	4.91703	3.20266	4.15775
b1682	0	0.109006	0	0.0675248	0	0.079128	0.294135	0.65613	0.795375	0	0	4.04443	8.42977	8.54973
b1683	0.33165	0.218804	0.300988	0.0813243	0.072214	0.127065	0.118082	0.474131	0.638613	0	0	2.68527	3.0669	1.0297
b1684	0	0	0.447327	0.282016	0	0	0.409482	1.64418	0.474551	0	0	2.98849	27.5052	0
b1685	105.834	6.98234	6.86067	8.65056	19.2037	20.2741	37.6814	67.2451	58.2256	0	0	352.726	0	54.765
b1686	20.4016	5.38394	9.58836	3.96048	3.14662	10.7476	16.6463	10.5323	11.5749	15.0737	0	29.9639	6.50558	2.63927
b1687	0.877626	0.521108	0.777524	0.418452	0.414041	0.812592	1.23253	0.76674	0.86508	0	0	7.61816	1.16606	0.605517
b1688	2.37881	3.26437	4.62618	1.82771	2.45171	5.24051	5.19468	4.68551	5.56209	5.62424	0	4.38961	1.97222	0
b1689	0	0	0	0.31364	0	0.367535	0	1.21904	1.05553	0	0	1.87856	0	0
b1690	0	0.112282	0.0551626	0.034777	0.0617623	0	0.201983	0.337924	0.526678	0	0	0.192276	0	0
b1691	0	0	0	0	0.029331	0.0387073	0.0479609	0.0641923	0.166747	0	0	0.167405	0.128863	0
b1692	0.66545	0.351222	0.345102	0.217568	0.144896	0.637385	0.789762	0.211408	0.823735	0	0	0.300723	0.212196	0
b1693	2.41994	0.957924	1.77788	0.527463	0.644015	2.62693	3.06347	2.05012	2.77365	4.7679	0	5.16418	0.25722	0
b1694	0	0.0402496	0.0790965	0.049866	0.0221399	0.0292174	0.108607	0.0969084	0.0839102	0	0	0.1838	0	0
b1695	0	0.240248	0.177046	0.18603	0.0660761	0.130798	0.0540225	0.433832	0.187821	0	0	0.359984	0.145149	0
b1696	0	0.163674	0.160822	0.101389	0.0450156	0	0	0.591112	0.255914	0	0	1.98532	0.593315	0
b1697	0	0.105196	0.206726	0	0	0.152725	0.189236	0.379918	0.548268	0	0	0.510401	0	0
b1698	0	0.707668	0.309039	0.340956	0.389264	0.114156	0.42434	0.378632	0.409808	0	0	0.583478	0	0
b1699	0	0.104185	0.0511845	0.193614	0.143271	0.113442	0.187417	0.627109	0.162899	0	0	0.252747	0	0
b1700	8.90132	1.17452	0	0	0	0	2.11284	0	2.44858	0	0	1.34086	0	0
b1701	0	0.298696	0.440236	0.18503	0.18484	0.189722	0.201495	0.359583	0.155676	0	0	0.188158	0.0902308	0
b1702	1.73567	0.585273	0.300039	0.141869	0.223957	0.738875	0.778188	0.428873	0.477449	0	0	10.5671	9.0399	1.19752
b1703	0	0	0	0.114931	0.0510279	0.471381	0.500633	1.4518	1.06368	0	0	6.88384	6.05303	0
b1704	2.06064	1.22355	0.467533	0.673723	1.04694	1.28293	1.16165	2.61859	3.25934	0	0	7.56618	6.24234	0.533151
b1705	0	20.2023	19.8503	12.5145	11.1126	19.5533	12.1139	97.2818	49.1363	0	0	15.3757	32.5481	0
b1706	3.11309	0.41077	0.448458	0.226183	0.22595	0.430704	0.410517	1.20878	0.856351	6.1336	8.88215	5.91392	0.110299	0
b1707	0	0.583792	0.458896	0	0.12845	0.678045	0.52509	3.93565	4.38142	0	0	26.3923	0.564331	0
b1708	1.90969	2.01585	0.742771	2.18529	1.52467	4.57286	2.49308	11.2238	10.769	11.2877	0	21.647	3.65372	0
b1709	0	2.38374	1.59696	1.67799	1.19201	3.38209	2.2415	4.0436	6.21188	0	0	12.3697	1.30925	0
b1710	2.71909	1.25573	1.41012	0.555627	0.789413	4.94838	2.25893	7.77449	9.72359	16.0719	0	14.131	2.60116	0
b1711	3.37003	1.63047	0.436924	0.91819	0.448432	2.47473	0.933237	4.90706	4.32614	6.63984	0	3.97659	0.716415	0
b1712	607.962	41.1655	134.827	34.6544	69.673	202.28	318.995	425.681	246.457	425.549	0	512.734	35.7119	521.569
b1713	11.5224	12.1123	8.31593	9.48089	5.38023	14.7889	13.6293	15.954	12.7048	5.67554	0	59.1005	3.42928	29.8121
b1714	3.91564	10.7761	3.26354	5.71523	3.41039	18.4846	6.04125	12.2619	11.8483	9.91905	0	93.9316	9.63207	79.311
b1715	0	0	0	0	0	0	0	0	0	0	0	0	0	0
b1716	1308.48	381.253	457.193	204.494	95.8057	2520.56	1935	2835.49	2292.62	6101.12	8473.82	941.594	1378.98	544.054
b1717	9613.41	2349.5	5562.64	1091.57	1227.07	26535.3	24184.3	21446.4	17332.3	54583.4	75394.8	23079.1	17849.3	6763.46
b1718	403.576	226.134	373.35	95.2962	157.545	1021.42	1034.6	833.828	725.65	1292.12	2159	786.723	728.353	201.584
b1719	51.3534	23.6193	61.5385	8.21507	27.1202	73.7579	147.259	45.7584	40.0245	44.808	18.8382	218.524	136.773	21.5118
b1722	6.45316	2.76734	3.3466	1.91205	1.52222	5.02206	6.60561	8.84113	9.98515	4.7679	20.7134	3.55417	2.82942	1.66963
b1723	1.81139	0.478023	0.0782822	0.0493527	0.306768	0.347	0.501615	1.34275	1.49484	3.56891	0	15.0301	0.57761	0
b1724	0	0	0	0	2.73128	4.50549	2.23304	4.48315	3.88183	0	0	67.6689	0	0
b1725	4.03191	0.709341	0.871226	1.0436	0.926688	1.93093	1.67479	5.3371	3.23487	11.9158	0	24.1422	0.21428	0
b1726	2.8612	0.377533	2.22573	0.818533	0.623003	4.79593	3.3957	8.86256	7.67384	8.45596	0	14.6002	1.36855	1.48056
b1727	1.95982	0.905087	0.508181	0.400475	0.213367	1.03244	0.34889	3.89137	7.27796	5.79203	0	31.2933	4.99952	0
b1728	3.61216	1.58874	0.312211	0.98416	0.174782	0.922619	0.142898	4.78148	2.8153	0	0	3.67283	0.383944	0
b1729	0.359529	1.42319	0.699193	0.323256	0.287043	1.96289	1.19474	1.31352	1.43404	4.25019	0	1.80076	35.1961	2.23251
b1730	0	0.0977905	0.28826	0.0605773	0.0537912	0.42592	0.0879573	0.353173	1.12128	0	0	0.13955	1.18163	0
b1731	0	6.27618	12.3336	3.88784	0	13.6677	5.64508	67.9998	52.337	140.574	0	55.5291	7.58369	0
b1732	0	0.0269264	0.0529144	0.116759	0	0.0586381	0.0968754	0.259321	0.364876	0	0	4.47265	0.130144	0
b1733	0.821165	0.325056	1.06464	0.201359	0.715208	1.33711	2.14405	2.47833	2.48475	0	0	2.07193	0	0.849843
b1734	0	0.245585	0.144783	0.243408	0.10807	0.534814	0.751026	0.827807	0.921567	0	0	0.855115	0	0
b1735	0	0.274077	0.269301	0.282967	0.251267	1.19373	1.23259	1.75971	1.14276	0	0	2.99856	0	0
b1736	0	1.07276	1.05407	1.32906	1.18018	6.22978	6.27178	9.68575	5.59108	0	0	9.33826	2.59249	0
b1737	0.740455	0	0.288	0.211829	0.107485	0.319152	0.219695	1.11737	0.458291	0	0	1.32453	0.236113	0
b1738	23.0771	1.5225	2.24396	0.943129	0.418738	3.86817	1.36941	12.83	22.2182	34.1009	0	18.4676	5.51905	0
b1739	0	0.608609	0.598004	0.754018	0.334775	0.883586	0	15.3861	6.34398	0	0	242.139	0	0
b1740	4.2621	2.15579	0.736774	1.45155	0.721807	4.76274	1.77041	9.70392	9.57477	12.5962	0	48.8476	1.81211	0.735159
b1741	0	0.339661	0.667485	0.263008	0.326963	1.47937	1.06927	3.68009	2.92094	3.80386	0	5.81649	1.02606	0
b1742	1.25946	2.82513	3.26576	1.23533	1.64542	3.13648	4.03578	2.60077	2.42516	0	0	0.0948599	0.40161	0
b1743	1.73976	3.44339	3.15783	2.70185	2.14663	9.83166	6.19428	7.18518	4.54644	10.2833	0	13.4311	2.21907	0
b1744	0.571047	0.075349	0	0.0466757	0.0414469	0.0546963	0.135545	0.907084	0.628335	0	0	0.0860204	0.182093	0
b1745	0.750608	0.396168	0.681213	0.214734	0.299638	0.467318	0.579039	0.476924	0.619433	0	9.63722	0.409874	0.359026	0.388411
b1746	0.334079	0.132244	0.389819	0.191146	0.218229	0.447984	0.555083	0.371469	0.459492	0	0	0.0880676	0.213059	0
b1747	1.04607	0.0690139	0.135623	0.0855028	0.0759244	0.150293	0.124149	0.41541	0.503568	0	0	0.137879	0	0
b1748	2.11422	0	0	0.0691243	0.0613807	0.121503	0.100367	0.268669	0.232633	0	0	0.222935	0	0
b1749	4.42279	56.5103	8.60121	44.887	6.58068	25.4882	3.93676	13.6996	13.8898	17.4281	0	15.4344	3.0557	0.762876
b1750	0.890634	1.64526	1.27018	0.509585	1.03428	2.72983	2.00833	2.688	4.16493	0	0	16.9044	5.39603	0
b1751	0	0.379738	0.373121	0.313643	0.417762	1.10262	0.91081	1.37143	2.90275	0	0	32.55	5.50618	0
b1752	0	0.354864	0.116227	0.14655	0.0650662	0.601062	0.425575	2.2784	3.32911	0	0	6.11059	5.14552	0
b1753	1.37319	1.44952	2.1364	1.79584	1.69433	1.18374	2.28159	5.235	3.96623	8.11659	0	4.86101	6.56814	0
b1754	0.447745	0.708955	0.464401	0.548961	0.357474	1.28659	1.06278	3.05827	1.78591	0	0	9.15589	1.28498	0
b1755	0.957813	0.84255	0.372541	0.756793	0.278075	0.611612	0.454697	1.67359	1.14173	0	0	1.93578	0.509039	0
b1756	1.01629	1.07279	0.527049	0.249207	0.0737632	0.778745	0.723688	1.61434	1.25803	6.00708	0	6.77426	0	0
b1757	0.776148	1.28015	0.905647	0.475801	0.563333	2.37893	1.2896	6.34933	6.08484	4.58764	19.9303	21.7756	8.78607	0.401627
b1758	1.10669	2.62848	1.86527	1.53778	1.12454	3.39205	2.62686	4.92221	4.87087	6.5414	0	2.79236	1.05869	0
b1759	0	1.02866	2.02147	1.48683	1.32027	3.48464	1.54204	7.01727	4.6464	0	0	5.77385	4.97183	0
b1760	0	7.04499	6.92223	6.54613	3.8752	12.785	7.92073	31.804	23.8664	0	0	5.02671	0	0
b1761	1.12591	1.08946	1.5084	0.736231	0.762714	2.73201	2.76157	3.39808	4.12955	4.43667	0	9.56845	2.03448	0.388411
b1762	1.03814	0.342452	0.201891	0.127281	0.339068	0.696047	0.492828	2.96826	3.9266	0	0	1.27059	3.31036	2.14878
b1763	6.23548	1.96198	1.11936	1.31338	1.0444	4.6172	2.84628	7.04765	6.23431	1.41756	0	16.6182	51.8499	10.6727
b1764	4.13685	6.75493	3.01692	4.31121	1.6514	12.4815	4.66417	11.3354	10.8107	0	0	21.6159	114.6	23.5473
b1765	4.07863	0.896953	1.41012	0.444501	0.789413	1.69287	1.77487	7.34257	9.72359	0	0	4.24953	214.595	37.9897
b1766	1.53298	0.674249	0.530001	0.375904	0.185441	1.46832	0.636773	2.02923	3.30325	1.51018	0	13.7687	6.35478	0.528839
b1767	2.67655	0.706336	0.416417	0.481302	0.427384	2.35857	0.952966	3.23121	3.53408	0	0	17.9821	20.9958	1.10801
b1768	5.23702	2.76408	1.35796	1.54101	1.29236	6.01938	2.98337	7.48691	8.49955	0	0	18.4205	39.0771	1.08398
b1769	0	0.341958	0.144	0.121045	0.080614	0.425536	0.131817	0.70571	0.916581	2.18833	0	0.57164	0.236113	0
b1770	1.61329	0.53218	0.418326	0.725262	0.117094	2.00883	1.05307	2.56265	4.10501	0	0	5.04267	1.2861	0.834817
b1771	0.561672	0.518785	0.728207	0.229548	0.529965	1.18356	0.933237	1.15985	0.540768	0	0	0.486498	0.537311	2.90644
b1772	0	0	0	0.04808	0	0.225367	0.0698114	0.840937	0.323619	0	0	0.53165	0.750286	3.65262
b1773	0	0	0	0.0571718	0.0507672	0.066996	0	0.88885	0.288611	0	0	0.921935	0.669122	4.34332
b1774	0	0	0.134085	0	0.0750638	0.148589	0.0613707	0.903542	0.49786	0	0	0.389475	0.494678	2.67583
b1775	0	0	0	0.059398	0	0.208814	0.129367	0.346297	0.399799	0	0	0.314717	0.115863	0.752074
b1776	0	0	0.0643675	0	0.0360342	0.332874	0.176765	0.6309	0.341424	2.93454	0	0.766564	0.158313	0.513811
b1777	40.0438	7.04499	5.19167	7.63716	4.84401	25.57	19.0097	61.4877	38.5534	0	0	224.191	25.538	0
b1778	10.0142	1.32136	0.973755	0.6139	0	2.87756	0.891372	11.135	8.26414	0	0	36.6755	4.78993	2.59099
b1779	191.532	13.5077	12.7015	13.7658	13.8615	24.566	21.1635	106.572	99.0145	468.456	268.524	2446.07	45.9816	7.9744
b1780	7.75904	0.853164	0.586809	0.898453	1.68947	1.3625	0.537163	4.72455	6.04735	11.4655	0	68.4962	17.5254	0
b1781	2.7146	2.05958	0.967853	0.499237	0.935878	2.4701	1.36923	2.80281	4.57373	8.02268	0	5.85262	0.432809	0
b1782	14.8702	4.36024	1.6066	2.90357	0.599604	17.5664	3.52962	38.8429	29.997	43.9472	21.2135	24.7955	4.47831	2.56492
b1783	0.243669	0.385823	0.442283	0.139418	0.336027	0.280071	0.491621	0.425764	0.402172	0	0	7.11168	0.1554	0
b1784	0.397082	0.209578	0	0.0649127	0.0576409	0.152134	0.141378	0.315374	0.273073	0	0	2.34774	0.12662	0
b1785	0	0.132568	0.130258	0.136867	0	0.160386	0.158983	0.319181	0.27637	0	0	2.49715	0.21358	0
b1786	1.32339	0.611171	0.386049	0.10817	0.0240132	0.728858	0.628246	1.31385	2.63928	1.95557	0	3.15224	0	0.684805
b1787	3.23293	6.61202	1.46702	3.17101	0.821269	12.696	3.45319	13.352	13.5621	19.1091	0	29.5242	1.54636	3.34584
b1788	0	119.792	29.4262	27.8274	16.4734	271.743	67.3415	216.316	202.911	0	0	0	0	0
b1789	4.16835	11.2752	4.05319	9.53985	3.32795	4.79106	3.71028	7.61444	6.30647	0	0	5.9651	0.664593	0
b1790	0.717802	3.5991	1.67513	2.46418	1.25036	0.96254	1.10746	2.8505	2.66562	0	0	4.0007	0	0
b1791	0	0.0581287	0.228463	0.216051	0.223822	0.548547	0.470552	1.11965	0.787694	0	0	2.18992	0	0
b1792	4.18945	14.9254	5.43161	11.3003	2.73665	54.5735	11.933	45.9179	39.1828	24.7629	0	40.7048	0	0
b1793	38.0433	85.3362	22.1954	51.3076	17.9478	291.511	47.4077	126.904	136.045	112.433	0	98.8547	0	0
b1794	0.529101	1.39629	0.891772	0.259483	0.61444	1.06425	1.56986	3.78205	4.14804	0	0	28.7923	2.8682	0
b1795	63.9238	59.0428	33.1508	38.3163	9.27925	95.9236	42.9904	145.541	211.01	125.946	0	129.192	13.5892	0
b1796	113.483	0	80.9219	0	4.11834	97.8274	127.949	90.1318	101.455	0	0	8.54735	18.0935	0
b1797	0	1.47751	6.77491	0.305087	0	6.79272	9.3026	8.30057	7.7006	0	0	9.6989	0	0
b1798	2.11096	3.34247	1.64212	1.38035	0.459645	10.1097	3.13164	6.20338	6.67788	6.23872	0	10.4936	0.336568	0
b1799	0.609173	0.482278	0.236937	0.647297	0.265285	1.5754	0.650675	2.9997	2.346	0	0	14.5445	1.554	0
b1800	0	0.453626	0.254698	0.160573	0.356463	0.282249	0.524587	0.468081	0.743047	0	0	1.2022	0	0
b1801	0	0.226488	0.0890166	0.0280601	0.07475	0.0986454	0.162971	0.381719	0.236085	0	0	0.413703	0	0
b1802	0	0.185746	0.304182	0.115062	0.238403	0.179779	0.445516	0.372682	0.451773	0	0	0.371092	0	0
b1803	0	0.529653	1.11519	0.421842	0.249723	1.59284	2.31391	1.18415	1.49855	0	0	0.561475	0.182856	0
b1804	3.74107	8.0215	7.09355	3.74586	3.25835	7.79366	5.60542	6.68535	5.72434	13.8204	0	9.06949	1.64029	1.93586
b1805	3.14513	0.565905	0.481905	0.257074	0.311285	0.903746	1.18767	1.13543	1.45505	0	0	3.85477	11.7614	2.36725
b1806	8.65686	4.40587	3.04641	3.1336	2.78256	8.05485	7.19183	11.3937	11.0562	0	31.7564	18.3962	78.8704	11.519
b1807	2.76177	4.00853	1.5516	2.55837	1.33634	5.64328	3.4962	6.58043	8.61002	10.8828	47.2785	19.553	65.4624	6.66918
b1808	1.23595	0.750179	0.480722	0.626343	0.430589	1.11279	1.14413	2.55223	2.85588	1.46108	0	5.98565	4.57173	0.255823
b1809	4.3216	33.6436	6.72354	20.8409	4.3913	63.7458	6.1547	63.8416	86.1871	102.176	0	143.706	1.37805	0
b1810	15.999	7.38868	1.03713	1.96157	1.16122	18.3891	2.84817	13.9776	33.0076	0	0	28.9204	5.1017	0
b1811	0	100.67	60.8713	38.376	12.7789	101.183	69.6517	335.606	234.088	693.785	0	280.688	0	0
b1812	0.738458	0.633352	1.14889	0.301797	0.509178	0.778045	1.31461	2.40467	1.72665	2.18243	0	2.92001	0.706429	0
b1813	2.49594	0.164669	0.647197	0.204011	0.181157	1.67347	1.62921	5.74882	6.00762	14.753	32.0459	10.6214	4.77537	1.29156
b1814	8.10118	2.62377	2.14837	1.9564	1.73724	3.03326	1.35478	2.74916	3.6466	4.35311	0	38.3434	7.63239	0.762191
b1815	0.913082	0.361441	0.394603	0.0995103	0.419723	0.524744	0.361218	0.821889	0.962822	0	0	0.46994	0.388213	0
b1816	2.19899	1.78238	0.814567	1.20682	0.798019	1.92571	1.19304	3.0938	4.45032	1.85682	8.06665	18.7155	0.701204	0
b1817	35.2578	4.42712	2.43304	5.81022	2.51776	7.18991	3.84697	27.0091	26.124	33.613	0	209.146	207.63	23.5414
b1818	16.3935	2.65472	1.35254	1.76631	1.73069	4.63926	5.04086	24.0282	28.287	74.8759	0	202.159	265.414	32.3897
b1819	53.1984	2.51981	1.94535	2.1184	3.51466	3.98492	5.34231	22.5343	25.1402	84.6579	0	227.72	230.967	29.6457
b1820	17.6806	0.777645	0.509396	0.160573	1.42585	1.12899	2.7978	7.80136	7.29537	0	0	22.9343	153.476	24.3974
b1821	2.59043	59.303	63.3074	34.5126	28.4842	28.7816	35.0475	19.3395	14.6078	15.3114	0	13.9013	0.413012	0
b1822	6.59865	17.0267	14.2586	12.7048	8.51438	28.4416	24.6252	16.5378	17.1432	8.66736	0	17.8091	1.87035	0
b1823	23027.5	16192.7	29572.7	11978.8	14819.7	47028.9	51274.6	23734.2	17910.5	10011.6	9320.11	9630.25	180.036	41.7367
b1824	26848	35436.7	59271.9	24453.8	29587.9	90613.9	100087	45530	35051.7	9887.4	8590.84	4072.64	373.385	0
b1825	159.264	52.5368	12.9053	23.5947	2.88987	76.2735	8.26945	431.654	405.246	58.8359	255.603	124.453	41.2632	0
b1826	250.916	220.721	32.5312	75.2003	12.1411	360.501	29.779	1381.71	989.317	0	0	132.29	240.033	0
b1827	0.757532	2.29898	0.785711	0.928778	0.439857	7.32839	1.9779	6.97919	8.96044	0	19.4522	24.3058	3.86494	0.783988
b1828	0	0.289195	0.568312	0.447863	0.318153	0.349881	0.346821	0.638268	0.502416	0	0	0.921677	0.232962	0
b1829	16.8911	1.45726	1.43187	0.849616	0.848743	2.98683	2.85277	4.74698	5.27187	7.67994	16.6821	35.1568	3.31455	4.03407
b1830	14.3784	12.8589	27.5776	6.45453	13.6164	26.8007	60.9984	13.5949	11.4889	13.4901	5.86054	47.5038	4.80325	5.19637
b1831	72.2406	104.249	446.366	45.3693	197.518	267.579	791.808	88.4601	74.5828	135.126	187.851	161.475	20.1199	17.9811
b1832	14.9002	35.3891	55.3784	28.8236	21.3889	59.4657	76.8257	36.8174	33.9285	9.78573	0	59.8535	19.0052	11.9938
b1833	0.397082	1.20507	0.66926	0.649127	0.345845	1.36921	0.848269	2.33377	2.12997	0	0	4.3964	0.886338	0
b1834	0.688897	0.454496	0.468905	0.281542	0.312503	0.709331	0.470114	1.77821	1.65814	3.05394	0	6.42743	0.329509	0.534717
b1835	0.345027	0.591838	0.178931	0.253814	0.275465	0.396571	0.163793	1.53457	1.28129	2.03938	8.85976	6.19786	0.990188	0
b1836	52.8726	13.953	34.2746	8.64332	21.1064	25.3214	31.3749	71.3881	65.449	0	0	163.273	25.2897	0
b1837	0	47.1388	33.0839	25.0291	18.521	53.7716	30.2849	113.495	98.2725	0	0	42.2831	0	0
b1838	0	1.19799	0.523164	0.412283	0.0732195	1.15951	0.838079	1.4422	1.80376	0	0	2.39341	0.321683	0
b1839	13.387	5.29919	8.09954	2.9179	3.88653	22.2254	18.5357	43.2381	41.1211	0	0	83.6873	116.68	9.23632
b1840	0	1.56528	1.538	0.969626	1.76984	3.78748	2.89398	5.86241	7.61415	3.89544	0	18.8375	22.4863	1.36411
b1841	3.28466	2.16704	2.98099	1.61087	1.43042	6.29226	1.16948	14.6091	18.0709	19.4149	0	86.3407	111.024	6.79875
b1842	29.2604	239.375	91.0466	66.9666	40.3511	207.395	79.8711	306.761	156.955	0	0	285.398	9.33045	0
b1843	2.0176	1.86355	1.4387	0.907023	0.805414	2.60889	2.75369	3.36513	2.77502	5.9628	0	9.57362	0.965048	0
b1844	1.98829	1.18059	0.644454	0.325035	0.649402	0.761775	1.17986	3.15832	4.64899	17.6285	0	12.7666	0.951028	1.02887
b1845	0.906864	0.299149	0.411511	0.111187	0.213917	0.390878	0.376696	0.50418	0.623651	0	0	3.68838	2.31342	0
b1846	4.00568	1.84991	1.16851	1.30965	0.799521	3.74083	0.831947	5.24936	4.68301	0	0	9.20187	0.638658	0
b1847	3.83718	11.1389	1.98996	5.95917	1.94954	19.1118	2.7324	38.3998	29.555	0	98.5328	37.8603	8.5651	7.94239
b1848	18.8155	11.1721	7.31828	3.07585	2.04846	20.7253	3.34956	73.2247	37.5244	55.6071	241.576	341.887	20.9993	19.4726
b1849	0	0.933063	0.859504	0.830868	0.288701	2.15894	1.78338	1.8253	1.51969	0	0	2.09713	0	0
b1850	50.2754	4.69893	10.9995	3.5957	6.15772	18.4594	36.049	23.459	18.1516	68.1007	53.7914	12.1883	3.67391	4.33594
b1851	7.09714	1.66482	2.79451	0.644555	1.71705	3.47444	8.0174	4.71817	4.8084	12.4295	0	5.96907	1.00582	0.544074
b1852	2.34427	2.82811	1.38941	1.42342	0.802129	5.03612	2.345	9.78822	6.1262	5.93849	0	18.5647	4.80556	0.346592
b1853	1.98669	1.13595	0.601006	1.02845	0.67291	1.52232	0.785941	5.36482	6.01149	11.7429	0	26.8094	26.185	2.74143
b1854	10.6689	1.31693	1.16013	1.32214	0.899255	5.37321	2.69578	13.9404	10.3665	24.411	8.83748	134.597	17.2298	2.84943
b1855	3.98072	1.42568	1.10593	1.11556	0.660395	5.01115	2.29469	10.7494	8.29084	3.3613	0	22.1439	3.62673	1.7656
b1856	6.88768	0.807843	0.595324	0.28149	0.416594	1.5027	0.953676	4.92336	5.47348	4.52351	0	34.0369	5.61281	1.18804
b1857	14.4275	1.26913	1.32495	0.589631	0.349052	2.70622	1.21286	8.68955	9.67376	10.6597	0	28.3662	8.4344	1.24428
b1858	1.62286	1.60601	0.526007	0.464267	0.647833	2.72022	0.577806	2.96452	2.7901	4.79617	0	11.0924	1.81121	0
b1859	1.53202	3.53761	1.68833	3.56886	2.11271	4.9892	2.81824	3.65034	4.10894	0	0	3.51937	1.70984	0
b1860	2.15812	2.84762	3.3576	1.89629	1.37058	6.35634	6.65932	4.79932	5.56553	3.18904	13.8543	5.52655	7.39786	1.11675
b1861	0	5.53732	10.4405	3.15203	5.76249	9.6687	13.7301	6.84623	6.86395	0	0	10.0803	14.8285	2.34763
b1862	0	0.920838	0.150799	0.0950704	0.506521	1.00266	1.24237	3.32563	3.19952	0	0	0.438022	4.82159	0
b1863	40.7564	21.9094	11.3509	13.8188	7.77876	39.7604	22.0352	64.7398	65.1915	26.7669	38.7614	58.2105	2086.13	567.083
b1864	24.2503	7.39264	5.09552	4.71615	3.64159	20.4242	14.4895	32.8089	38.8745	29.6561	42.9455	85.0261	1472.17	385.112
b1865	28.316	12.8101	13.1113	10.4151	8.36758	41.2639	32.1655	28.915	34.495	47.8199	0	64.2099	4483.05	948.224
b1866	5.66135	2.16988	1.43303	1.52044	1.03704	3.95074	3.67942	5.7811	6.4147	15.9347	6.9226	45.1783	623.505	126.946
b1867	1.29521	1.87992	2.01509	0.635202	1.2221	2.85335	2.61319	3.08609	6.76947	15.3114	0	13.4135	8.67325	0
b1868	2.88634	0.38085	0.561321	0.412863	0.471358	1.31319	1.1133	1.83394	2.28268	4.26513	0	7.06531	5.06212	0
b1869	25.3099	22.6352	26.2514	12.6424	21.2276	24.7812	22.6954	21.442	26.6886	33.2447	0	7.51927	20.6251	0
b1870	7.48025	1.31601	1.18533	1.3587	2.83525	2.70669	2.76193	2.77248	3.65808	4.91267	0	14.4606	21.2024	0.860165
b1871	5.68674	1.35065	1.0322	0.883154	0.536571	3.48602	2.69963	2.25829	3.91078	6.72261	0	8.67337	14.5069	0
b1872	0.188341	0.273365	0.317438	0.123155	0.150369	0.360795	0.357639	0.478674	0.310853	2.22648	0	0.43975	0.240229	0
b1873	0	0	0	0	0.035018	0.323486	0	0.613108	0.464514	0	0	0.145355	0.461545	0
b1874	9.08734	2.28912	1.6066	0.742773	1.19921	2.69035	2.45112	22.5709	14.9985	19.5321	0	16.0533	3.95145	0
b1875	3.88564	0.512706	0.671696	0.952803	0.470037	3.47365	2.76691	4.732	3.20659	7.65571	0	8.14568	6.19518	0
b1876	3.0434	2.00787	0.789153	1.06288	0.481946	3.28605	1.44478	3.64771	3.46288	6.5414	7.10452	28.778	28.9376	1.14534
b1877	0	3.17349	1.33637	2.24668	0.249375	6.74641	4.07768	11.4611	10.1602	0	0	2.97598	6.57363	0
b1878	5.74241	55.3125	17.8681	39.8963	13.1288	28.3262	13.9711	31.9256	30.8027	0	0	1.1894	0	0
b1879	0.897939	0.770134	0.378357	0.550462	0.325865	1.59113	0.77262	4.88521	5.21799	3.98064	5.76441	0.481872	0	0
b1880	1.37013	9.58173	3.61196	6.01016	2.08834	6.12428	2.54753	8.34285	11.8094	13.4976	0	0.0687972	0	0
b1881	4.1578	2.19447	1.21288	2.71877	0.905326	6.96928	2.71398	5.28359	4.00305	0	0	0.822039	0	0
b1882	5.86546	14.3179	5.32319	13.1842	5.32149	17.697	6.96119	13.5097	8.47074	17.3347	0	2.20888	0	0
b1883	0.513228	0.20316	0.26616	0.209749	0.0372504	0.344108	0.182731	1.05981	0.917663	6.06715	0	0.173949	0	0
b1884	0	0.266003	0.0871226	0.164778	0	0.386186	0.239255	1.60113	1.20152	3.97195	0	0.328982	0	0.695453
b1885	0.303685	0.200355	0.118118	0.148934	0.154292	0.523579	0.360417	1.49541	1.37837	0	0	0.194421	0.290514	0
b1886	0.872342	1.99515	0.640894	1.16461	0.379891	1.53184	0.655693	1.70901	1.59976	3.43748	0	0.120456	0.278169	0
b1887	4.8494	0.213291	0.209575	0.264251	0.351972	1.54829	1.91844	2.56769	2.44562	0	0	0.608747	0	0
b1888	0.71822	0.347484	0.217273	0.234821	0.173763	0.45862	0.483021	0.988748	1.54762	0	0	0.126222	0.152682	0
b1889	1.21295	0.560165	0.550404	0.644428	0.176073	0.464716	0.647792	2.98641	2.25219	3.58473	0	0.29691	0.19339	0
b1890	1.28709	0.509492	0.584049	0.157805	0.280254	0.616405	0.534637	5.21346	5.66486	0	33.0505	0.218118	0.410423	0
b1891	9.98377	4.11671	3.72138	1.02006	2.62678	12.4315	12.7375	11.8941	11.5003	14.753	0	10.4334	3.18358	0
b1892	40.6505	25.2098	24.2435	4.98399	12.6869	61.1297	67.5422	44.5545	36.342	48.0552	0	12.5531	10.37	0
b1893	6.46587	35.4063	29.9692	13.741	15.0175	40.1008	39.5198	64.1923	49.3571	47.7729	83.0166	3.65248	0.515452	1.67292
b1894	62.8783	18.2528	21.1956	11.3069	20.0805	37.3404	34.3273	177.786	157.399	594.655	645.846	27.9417	0	0
b1895	4.58751	2.11861	2.67647	0.562456	0.998893	1.75761	4.62783	10.9306	6.94064	0	0	21.2497	0.731424	0
b1896	1.0483	0.599393	1.26851	0.599793	0.50724	0.937145	1.45148	1.38765	1.44183	2.06541	0	7.00074	0	0
b1897	0	0.0983229	0	0.243629	0.0540841	0.428239	0.0884362	0.710192	1.02489	0	0	6.73488	0	0
b1900	0	3.64028	0.967853	1.77748	1.20144	1.15027	0.423725	0.979579	1.56246	0	0	0.941175	0.517489	0
b1901	0	0.512475	0.359675	0.0907023	0.120812	0.159432	0.395095	0.176268	0.457878	0	0	1.75516	0.707702	0
b1902	4.8494	0	0.838298	0.264251	0.117324	0.928975	0.575531	3.85154	2.66795	0	41.5083	31.1678	2.57726	0
b1904	22.1583	2.92377	0.718205	3.16953	2.4124	3.18357	1.97233	30.7979	25.9051	32.7432	0	0.625846	1.76644	0
b1905	26.4892	15.0731	1.50251	8.25464	1.08146	60.5757	4.71564	65.7453	63.986	68.5001	42.5126	393.973	2.11169	0
b1906	0	92.6877	16.263	36.9105	14.5669	247.504	44.6612	625.653	496.878	593.147	644.208	141.716	7.99981	0
b1907	0.853602	4.11106	1.66004	2.1629	0.960301	4.94649	2.43135	4.47451	5.63542	12.6136	0	1.33405	0.680483	0
b1908	26.6484	13.8044	11.7724	4.437	3.79668	18.3398	15.8133	13.4828	10.8599	5.8338	0	15.871	0	0
b1909	0	1403	4235.3	534.026	1580.67	2012.35	4348.3	4191.94	3929.22	757.211	0	231.571	571.903	132.581
b1910	0	0	0	0	0	0	0	0	0	0	0	376.998	798.052	0
b1911	0	0	0	0	0	0	0	0	0	0	0	82.7407	875.751	142.114
b1912	4.11956	2.17429	0.890166	1.34688	0.498333	2.63054	1.46674	14.8325	14.7317	24.3498	0	20.892	11.8226	2.84229
b1913	3.11244	1.54006	0.840681	0.848006	0.602407	3.2296	2.03163	9.06396	9.13249	4.59923	0	22.6511	9.7594	0.536856
b1914	7.06162	9.18462	4.18531	3.05089	2.70912	13.0445	9.8175	29.0042	27.4727	11.9256	25.9045	74.7654	38.2802	1.04403
b1915	128.972	114.87	71.0651	57.9799	35.1033	463.248	133.932	379.004	407.993	381.162	827.95	369.13	10.2815	33.3691
b1916	5.20823	1.83259	0.900329	1.27712	0.693031	4.57286	0.927177	5.23961	8.47671	0	0	11.0491	3.59836	0.898355
b1917	0.816267	0.323117	0.529144	0.266877	0.533207	1.40731	0.871879	2.9822	3.36809	0	0	2.33623	13.2747	1.68955
b1918	0	0.646491	1.27045	1.20143	0.85347	1.87717	1.16297	1.40089	3.36943	0	0	2.14035	21.2479	4.05653
b1919	0	3.45491	0.577823	3.00536	0.606519	1.86761	0.595054	2.12383	3.21819	0	0	6.58768	12.2575	1.72967
b1920	4.47095	0.688261	0.483048	0.182721	0.378588	1.42746	1.23811	4.37952	5.53442	13.2134	0	11.1126	8.55407	0.771183
b1921	5.43818	5.20233	2.9965	2.22251	2.66427	13.0221	11.1333	20.9479	23.748	16.0719	0	1.27998	3.46821	0
b1922	15.7244	14.9848	8.15468	7.99724	5.45282	18.8266	10.5751	32.0546	34.4837	15.4906	22.4322	0.592168	2.22851	0
b1923	11.1947	1.95503	2.77472	0.726637	1.52945	3.91059	6.36946	9.10037	7.87976	5.83848	0	2.13271	0.734943	0
b1924	0.354868	0.327771	0.368069	0.14503	0.0772696	0.101971	0	1.01465	1.41545	0	0	0.681565	0.339477	0
b1925	2.5502	0.672993	0	0	0	0.732794	0	4.45598	7.36586	30.1473	0	0.384153	2.43959	0
b1926	0	0	1.37669	0.289309	0.770698	1.35609	0	7.8713	10.2233	20.9212	0	1.06636	3.38599	0
b1927	1.9899	0.393848	0.51598	0.135541	0.336999	0.476494	0.551047	1.47507	1.64215	5.88092	8.51625	3.83432	0	0
b1928	27.5391	5.28546	2.59668	1.63707	1.81709	5.99491	3.26836	47.3238	38.2216	73.9897	128.575	54.1176	9.57987	0
b1929	1.28844	0.90671	0.556819	0.94782	0.65461	1.48092	0.917479	3.47927	3.60331	2.53856	0	17.2736	39.1679	2.22239
b1930	83.4857	88.1268	43.2956	70.5134	38.3764	117.282	39.6326	163.557	130.137	0	0	511.423	1987.74	86.4013
b1931	0	0.129298	0.127045	0.16019	0	0.0938583	0	0.933928	0.404331	0	25.1626	2.65698	8.74915	1.01413
b1932	0	0.94219	0.925773	1.60504	0.7774	0.683941	0.635587	2.2685	1.22764	0	0	1.41176	2.27695	0
b1936	0	43.7861	43.0231	22.2802	14.6232	43.1362	45.0094	193.903	208.647	0	0	8.00181	0	0
b1937	18.856	29.8563	19.5574	16.4398	7.29908	24.081	26.1082	116.813	102.874	37.1511	0	1.4202	0	0
b1938	6.7022	2.11475	1.20896	1.73873	1.71315	3.60052	1.72918	9.0261	13.146	8.612	0	0.384085	0	0
b1939	3.30227	1.96079	1.1417	1.84444	0.958723	5.11352	1.82895	20.1078	23.0126	19.519	28.2657	0.683983	0	0
b1940	6.57684	1.61164	0.730873	1.8431	1.29567	5.21955	2.78766	20.4463	20.6761	38.8742	48.2522	0.353825	0	0
b1941	4.38344	1.49418	0.568312	1.22416	0.927946	1.67943	0.736994	6.26663	7.13431	17.273	9.37999	0.220102	0	0
b1942	0	1.9548	0.548783	0.691956	0.921659	4.05429	1.75824	13.7835	16.5922	25.0192	0	0.398509	0	0
b1943	1.87054	0.49363	0.181886	0.267561	0.271529	1.0302	0.388495	3.34268	3.73047	2.76408	0	1.77868	0	0
b1944	24.8259	3.27575	1.23795	1.71702	1.94049	6.76784	3.39965	49.142	44.9146	45.1509	0	1.72601	0	0
b1945	4.89436	2.43971	0.84607	0.844552	1.14465	2.18771	2.64617	20.6456	17.2781	32.1439	0	1.16734	0	0
b1946	25.0355	5.28546	2.27209	2.86486	2.72564	8.87247	5.94248	65.617	59.915	103.586	64.2873	1.5085	0	0
b1947	31.8555	6.07144	1.83558	3.1824	2.56899	10.8487	5.881	67.4683	80.8128	146.449	0	1.59953	1.12866	0
b1948	3.36543	6.1059	1.63623	4.81391	1.22132	4.02937	1.99706	17.1067	17.4738	19.8923	0	0.411902	0	0.870741
b1949	0	26.1747	9.1852	9.26524	1.02841	29.8577	10.0897	157.551	165.652	335.005	0	6.93682	0	0
b1950	0.766012	1.51612	1.19176	0.813951	0.444781	2.56797	1.00002	13.0195	13.6965	13.5832	0	0.43271	0	0
b1951	1.09781	1.01399	0.142331	0.269197	0.07968	0.73606	0.521159	3.48767	6.9457	0	0	0.372084	0.350066	0
b1952	158.751	48.8764	0	17.3011	3.84074	60.8222	6.28023	260.575	196.512	0	1358.82	123.554	0	0
b1953	30.7322	4.05509	11.9533	10.0479	6.69169	11.7744	14.5893	19.5267	42.2692	0	0	27.7763	0	0
b1954	0	0	0	20.9422	9.29807	0	0	0	0	0	0	4.82439	0	0
b1955	1.45082	0.382869	0.470247	0.177879	0.526507	0.41689	0.0860924	0.921828	0.997731	0	0	2.43133	0	0
b1956	0.56828	1.16225	1.84194	0.719969	1.27863	1.82345	2.09077	2.52753	2.2276	1.67949	0	2.79282	1.54029	0
b1957	56.7416	97.331	22.0696	41.7411	12.355	244.569	94.2781	198.29	218.519	0	0	34.1894	361.871	0
b1958	1.84393	3.56848	0.717197	1.70814	0.223056	2.76699	0.802413	4.00298	4.81868	0	0	2.47672	4.3119	0
b1959	1.22379	0.88813	0.634658	0.300088	0.888236	0.820526	0.580964	1.16637	2.60897	0	0	1.10609	1.56095	0
b1960	1.85784	1.71598	2.16782	1.21484	1.61812	5.5164	5.51225	8.8533	12.5209	0	0	8.53567	33.1755	0
b1961	1.75613	1.52935	0.637508	0.947369	0.35689	3.39777	1.75072	3.40323	3.13999	0	0	11.7851	7.39182	0.363492
b1962	5.52353	1.33618	1.79031	1.05345	0.801802	4.05611	3.38695	4.09449	3.29207	0	0	5.30428	4.99041	0
b1963	0	1.86814	2.29448	0.867927	2.05519	9.83166	6.72115	6.18459	2.43412	0	0	0.799767	10.158	0
b1967	0	1.3499	0.884251	0.501725	0.0990044	3.201	0.809441	3.1418	1.31329	0	17.5135	15.1283	0.652449	0
b1968	0.370228	0.341958	0.288	0.0907841	0.107485	0.992918	0.615146	1.23499	1.78224	0	0	4.99139	0.236113	0
b1969	0	0.898653	0.504568	0.55668	0	1.11829	0.69282	2.00913	2.00728	5.75086	0	3.84722	1.24099	0
b1970	0	0.330341	0	0	0.181709	1.19898	0.297124	1.19304	2.75471	0	0	5.37404	3.19329	0
b1971	0	0.0717562	0.352529	0.0889003	0.197353	0.520882	0.387245	1.12298	1.42114	3.21439	0	2.25277	0.867052	0
b1972	1.06369	0.982465	1.10325	0.0869426	0.386015	1.22259	1.76735	2.36547	0.438898	0	0	1.6023	1.69592	0
b1973	1.0239	0.270204	0	0.167381	0.074315	0.490357	0.364551	1.13849	1.68992	0	0	3.27752	0	0
b1974	0	0.963985	1.13662	0.71658	0.530255	0.839714	0.520231	3.48146	2.81353	0	0	0.880408	0.465925	0
b1975	0	6266.37	6124.6	5761.04	5407.46	1684.74	2206.79	578.752	1175.05	0	0	4.73138	40.0627	0
b1976	3.74619	0.395445	0.485693	0.244962	0.10876	1.07646	0.800283	3.33237	2.26711	4.42858	0	39.2197	1.43348	0
b1977	0	0	0	0	0	0	0	0	0	0	0	744.666	218.938	0
b1978	0.120282	0.269808	0.280702	0.12781	0.248809	0.155532	0.256953	0.410785	0.372231	0.35548	0	1.34079	0.0575325	0
b1981	1.1544	1.47245	2.09535	0.723408	0.977518	2.94858	2.96845	4.27868	3.91649	2.27447	0	5.24583	0.490815	0
b1982	3.06659	0.359674	0.265055	0.417757	0.173114	0.358998	0.444823	1.29897	1.40593	0	0	28.1014	0.651908	0
b1983	0.879192	2.20416	0.797909	1.07794	0.127625	7.74743	2.08687	34.495	28.9009	15.5901	0	36.8178	6.16777	1.81979
b1984	0	0	0	0	0	0	0	0	0	0	0	894.633	218.938	0
b1985	0	0.4275	0.53461	0.385192	0.256531	0.789918	0.419469	0.421072	0.526636	0	0	0.499585	0.187841	0
b1986	0	0	0	0	0	0	0	0	0	0	0	941.175	218.938	0
b1987	0	1.00469	0.455623	0.382994	0.255067	0.504907	0.556101	2.13986	3.7057	0	15.0401	0.772005	1.12061	0.606165
b1988	0	0.324407	1.3547	0.401914	0.847614	0.706466	0.802413	0.78107	1.18354	0	0	0.972172	0	0
b1989	0	0	0	0	0	0	0	0	0	0	0	956.689	218.938	0
b1990	0.601146	3.25214	2.88372	1.32667	1.30895	5.29729	5.85025	5.4429	5.37431	0	0	5.02577	0.958454	1.24428
b1991	1.48403	6.39668	2.62953	5.4181	2.19014	7.72318	4.28574	4.63607	2.51741	0	0	6.44567	2.99707	1.02391
b1992	0.831139	11.7345	7.0042	6.25001	3.61947	7.64242	6.51026	3.30057	3.77239	0	0	1.8154	6.09569	1.72033
b1993	5.54841	6.40594	2.51773	2.15418	1.91286	5.18155	5.92642	6.1694	4.00643	0	0	2.92527	10.1732	2.87109
b1994	7.49433	2.68408	4.64999	1.26889	2.91398	5.07606	7.30607	10.1188	10.8967	12.6564	0	37.5769	0.682789	0.554005
b1996	6.25888	6.35907	3.81387	2.96718	3.31619	5.93496	4.45686	13.3222	13.8596	11.0985	0	3.77126	12.5736	2.59099
b1997	7.07901	0.934068	1.83558	1.44655	2.56899	4.06827	4.20072	16.3048	16.552	104.606	0	13.1962	41.7605	0
b1999	0	0.615636	1.81472	1.90681	1.18524	2.01102	3.32239	2.22339	3.20861	0	0	1.07518	0	0
b2000	1.57366	0.924955	2.18863	0.608053	1.31869	1.86356	5.67082	3.20416	3.30565	4.22798	0	10.705	40.3267	158.716
b2001	0.320018	0.675616	0.580863	0.313888	0.39486	0.704998	1.5192	1.42334	0.792275	0	0	1.83184	6.02071	18.2157
b2002	0	3.57506	1.62128	2.21461	1.36144	3.19404	5.44174	6.95232	3.72655	0	0	2.04069	0	51.7671
b2003	0	4.45893	4.38123	0	9.81081	12.947	4.01056	37.5749	4.64787	0	0	2.54521	0	0
b2004	0	1.82104	0.447327	0	1.25211	1.98286	1.22845	1.64418	0.949102	0	0	0.129934	0	3.57077
b2005	0	1.30022	1.27757	0.536958	0.476805	1.57307	1.94913	3.65228	1.80709	0	0	0.123697	0	0
b2006	0	175.222	235.935	184.925	103.523	65.9527	145.928	109.376	33.8234	0	0	7.53517	0	0
b2007	128.217	39.2501	21.9428	15.5106	14.5175	109.546	60.8678	234.625	197.512	272.831	263.393	1013.03	32.7083	0
b2008	1.01504	0.334833	1.18439	0.207416	0.294688	1.16667	0.662561	2.25728	2.09413	0	13.0323	3.87987	3.07487	0
b2009	1.83296	0.241857	0.712928	1.19857	0.399111	1.58009	0.435074	8.73473	7.05895	0	0	17.602	8.1828	0
b2010	1.79098	0.649875	0.696601	0.841741	0.844938	1.02927	1.11592	1.49357	0.800579	2.64652	0	2.56298	1.1422	0
b2011	0.697084	0.413908	0.542261	0.256399	0.328866	1.0683	0.661845	1.99312	2.30105	4.12031	0	12.0101	0.444567	0
b2012	61.4644	36.4958	27.891	47.7273	13.3834	179.56	69.2993	136.687	109.9	0	0	26.619	832.98	159.028
b2013	2.03007	1.87506	1.18439	0.995595	0.478868	3.64586	1.38535	0.967407	1.11687	0	0	0.458704	19.4202	2.62622
b2014	28.8778	5.47133	5.95199	2.663	2.68713	7.62419	8.26053	8.70375	8.60568	13.13	9.50686	13.0501	7.0834	0.383158
b2015	3.62279	0.557694	0.547976	0.444174	0.350592	0.636166	1.07489	2.49368	2.57444	3.56891	0	5.09342	3.27312	1.87465
b2016	4.9984	0.659533	0.648041	0.992204	1.45115	1.02591	1.18643	4.537	4.61594	0	0	24.8201	6.60317	3.69497
b2017	120.842	82.3827	49.6128	42.8017	52.6249	48.2275	43.0251	99.1759	99.7242	0	0	94.0502	115.601	20.8438
b2018	0	0	0	0	0	0	0	0	0	0	0	17.9584	50.6871	0
b2019	0	1.33356	0	0.516305	0.13754	1.69407	0.149933	3.01012	2.86702	0	0	13.5116	0.604269	3.26863
b2020	0.389178	0.256758	0.100914	0.190862	0.282468	0.857358	0.554256	1.79276	1.17761	0	0	4.76323	0.496398	2.81939
b2021	2.0004	0.131976	0.129676	0.12263	0.181488	0.814315	0.474819	0.873828	1.16933	0	0	5.61233	2.07311	7.24592
b2022	1.5058	0.662298	0.45553	0.328214	0.400738	1.34614	1.1914	0.956763	1.65687	0	0	12.4	2.24077	9.86982
b2023	3.61216	3.6541	2.8099	2.16515	1.83521	2.76786	3.42956	1.72133	2.64969	7.11689	0	7.61772	4.99127	17.4455
b2024	2.52407	0.333049	0.872655	0.618932	0.48853	1.20881	2.29662	1.87105	1.85153	0	0	6.43201	3.48775	11.3196
b2025	3.11638	1.54201	0.808075	0.70049	0.961301	1.79097	2.31159	2.22761	3.53617	0	0	7.36433	2.48434	10.4819
b2026	7.93944	43.5503	11.1758	28.1829	6.75035	22.2706	8.88417	11.1702	10.7639	0	0	32.462	2.17003	8.21672
b2027	10.1101	7.70766	3.05847	3.58094	1.67143	15.1173	4.93283	30.8699	31.6735	19.9195	0	50.2996	9.85071	2.90644
b2028	1.34324	0.827114	0.464401	0.329377	0.162488	0.771951	0.850222	2.56041	1.53957	0	0	7.26738	0.28555	4.17044
b2029	11.7107	5.52529	2.62249	3.04562	1.49388	19.9522	7.11762	15.6143	13.3736	16.7804	0	100.524	24.895	12.1196
b2030	19.8065	6.14512	10.2716	3.89417	6.48847	21.8937	26.4289	44.8117	38.654	31.641	13.7459	45.9833	32.4325	27.1462
b2032	1.88991	0.498743	0.857591	0.270332	0.102878	1.58393	1.23363	4.65316	4.224	0	0	14.2878	4.21852	50.8537
b2033	2.40811	1.27099	2.34158	0.787328	0.699128	4.95908	5.43014	7.84162	7.45226	0	0	31.8312	11.5183	140.81
b2034	1.6578	2.62494	1.21796	0.858193	0.601622	3.38749	2.88566	9.04117	10.1086	0	0	21.4556	5.28633	74.9189
b2035	0.447745	1.12251	0.406351	0.365974	0.12999	2.10142	0.743944	10.6684	10.8386	0	0	7.52031	3.85493	55.6059
b2036	0	1.96657	0.49866	0.864539	0.174475	2.62485	0.855884	12.0663	9.32376	0	0	19.3549	4.75254	59.708
b2037	2.46843	0.651414	0.640063	0.571661	0.20902	2.12789	1.61126	7.38455	6.45066	0	0	21.7059	16.6608	66.4206
b2038	3.99918	1.93486	0.864155	1.30753	0.387017	5.61809	3.6388	15.4578	18.885	0	0	33.1834	211.69	248.331
b2039	0.649656	3.00025	1.43187	2.76125	0.943048	3.48464	2.85277	7.22366	7.86313	3.83997	0	29.1628	176.707	128.418
b2040	3.78999	2.00034	2.21117	2.01359	1.87971	5.68724	2.6988	4.71586	5.4734	0	0	56.0682	215.925	98.0589
b2041	1.96451	8.74851	4.2662	1.88674	1.21197	17.1231	6.5282	7.41129	7.70067	0	0	69.3578	177.438	60.9936
b2042	15.3012	5.80457	3.05836	3.02247	1.38821	10.1981	3.85892	26.1282	25.6051	26.3789	0	60.4561	30.2916	5.27853
b2043	0.358587	0.0946305	0.325435	0.14655	0.260265	0.206078	0.51069	1.424	0.887763	0	0	1.09383	0	0
b2044	0.84569	0.334764	0.0548218	0.207373	0.276213	0.162005	0.351286	0.268669	0.756056	0	0	0.477719	0	0.437613
b2045	0	0	0.0516314	0.0325508	0	0.267009	0.0945263	0.569325	0.219094	0	0	0.539901	0	0
b2046	0	0	0.12994	0.0819199	0.121238	0.0639978	0.158595	0.424536	0.321645	0	0	0.327108	0	0.345746
b2047	0	0.0473152	0.0464908	0.0293099	0.0260265	0.137386	0.127672	0.341761	0.443882	0	0	0.162049	0	0
b2048	0	0.241641	0.237431	0.149687	0.265837	0.350817	0.173874	0.465437	0.25188	0	0	0.0827591	0	0
b2049	0	0.319487	0.403612	0.0565457	0.200845	0.231918	0.24631	0.109889	0.3806	0	0	0.130263	0	0
b2050	0	0.111244	0	0	0.0305958	0.242258	0.100058	0.200881	0.521811	0	0	0.0793745	0	0
b2051	0	0.235548	0.231443	0	0	0.512956	0.423725	0.850687	0.736586	0	0	0.134454	0	0
b2052	0	0.302659	0.0743463	0.0468713	0	0.164776	0.204169	0.728708	0.394355	0	0	0.280738	0	0
b2053	0	0.124257	0.122092	0.0769721	0.102524	0.270596	0.223524	0.299171	0.518088	0	0	0.248246	0	0
b2054	0	0.362381	0	0	0.0996666	0.657636	0.488913	0.8725	0.944341	0	0	0.0517129	0	0
b2055	0	0	0	0	0	0.079128	0.294135	0.787356	0.4545	0	0	0.093333	0	0
b2056	0	0.0559669	0	0	0	0.0406267	0.201357	0.673753	0.175015	2.50709	0	0.0479199	0	0
b2057	0	0.0559669	0.164975	0	0.0307855	0.12188	0.0503392	0.471627	0	0	0	0.0958398	0	0
b2058	0	0.226678	0.222728	0.140418	0.124688	0.329093	0.203884	0.818653	0.472566	0	0	0	0	0
b2059	0	0.183647	0.0902236	0.0568811	0	0.199966	0.247771	0.88433	0.0957146	0	0	0.262071	0.221907	0
b2060	0	0.0849597	0.0556528	0.0350861	0.0934668	0.0616727	0.101889	0.37502	0.236159	0	0	0.0646614	0	0
b2061	0	0.279257	0	0	0.30722	0.202715	0	0.336182	0	0	0	0.0797019	0	0
b2062	0	0.121744	0.0598112	0.113123	0.200901	0.265123	0.109502	0.14656	0.126902	0	0	0.0694929	0	0
b2063	1.23113	1.13713	1.55626	0.553461	1.00526	2.80062	4.01808	2.4445	2.79395	0	0	7.69631	1.37402	0
b2064	6.65533	1.85765	2.48902	1.23443	1.63493	3.80027	3.49361	6.01774	6.51325	10.591	6.57301	16.8214	7.8359	0
b2065	34.6274	7.01676	10.9029	3.23468	7.53984	15.2805	20.6949	20.6266	26.1947	51.1688	0	32.1818	44.1674	1.27988
b2066	11.5214	1.52024	1.35796	0.256836	1.36838	6.521	5.96673	6.65503	8.35549	6.19097	0	21.931	23.0454	0
b2067	0.133827	0.388485	0.329663	0.32816	0.213692	0.358913	0.333538	1.23296	1.12281	0	0	2.54511	0.170697	0
b2068	2.05634	1.26622	1.77736	1.00848	0.995002	2.62615	1.78969	2.39537	3.11112	0	0	1.1616	0	0
b2069	7.81707	2.11203	1.15826	0.608519	0.378245	3.45846	2.6065	1.95126	2.45751	0	0	2.98589	0	0
b2070	0.241946	0.415019	0.470524	0.177984	0.175606	1.11236	1.29215	0.922371	1.0316	0	0	0.537577	0	0
b2071	0	0.511094	0.251094	0	0	0.185503	0	1.53819	1.33188	0	0	0.875217	0	0
b2072	0	0.211625	0.103969	0.19664	0.116408	0.15362	0.856553	1.91072	0.772073	0	0	0.211397	0	0
b2073	0	0.660682	0.519336	0.327413	0.508786	0.287756	1.42619	1.43164	0.964149	0	0	0.301701	0	0
b2074	0	0.379992	0.106677	0.134508	0.02986	0.197027	0.292956	0.3921	0.848771	0	0	2.07608	13.3811	4.68351
[truncated: 2,554 more rows]
