# Supplementary material
Source: HighWire-hosted journal article supplement (doi:10.1101/rna.078937.121)
Supplement: Supplementary_Table4.xlsx [file Supplementary_Table4.xlsx]

## Sheet: Sheet1
gene	end5	end5_type	sample
b0001	148	primary	PCB109_PCR12_Ecoli_NOTEX_replicate4
b0002	385	internal	PCB109_PCR15_Ecoli_NOTEX_replicate4
b0002	832	internal	PCB109_PCR15_Ecoli_NOTEX_replicate4
b0002	383	internal	PCB109_PCR15_Ecoli_TEX_replicate4
b0002	832	internal	PCB109_PCR15_Ecoli_TEX_replicate4
b0002	426	internal	PCB109_PCR15_Ecoli_TEX_replicate5
b0002	148	secondary	PCB109_PCR12_Ecoli_NOTEX_replicate4
b0002	302	secondary	PCB109_PCR12_Ecoli_NOTEX_replicate4
b0002	832	internal	PCB109_PCR12_Ecoli_NOTEX_replicate4
b0002	1129	internal	PCB109_PCR12_Ecoli_NOTEX_replicate4
b0002	2581	internal	PCB109_PCR12_Ecoli_NOTEX_replicate4
b0002	426	internal	PCB109_PCR12_Ecoli_TEX_replicate4
b0003	2877	internal	PCB109_PCR15_Ecoli_NOTEX_replicate4
b0003	3002	internal	PCB109_PCR15_Ecoli_NOTEX_replicate4
b0003	3314	internal	PCB109_PCR15_Ecoli_NOTEX_replicate4
b0003	2877	internal	PCB109_PCR15_Ecoli_NOTEX_replicate5
b0003	3002	internal	PCB109_PCR15_Ecoli_NOTEX_replicate5
b0003	3314	internal	PCB109_PCR15_Ecoli_NOTEX_replicate5
b0003	3002	internal	PCB109_PCR15_Ecoli_TEX_replicate4
b0003	3314	internal	PCB109_PCR15_Ecoli_TEX_replicate4
b0003	2877	internal	PCB109_PCR15_Ecoli_TEX_replicate5
b0003	3002	internal	PCB109_PCR15_Ecoli_TEX_replicate5
b0003	3314	internal	PCB109_PCR15_Ecoli_TEX_replicate5
b0003	2581	secondary	PCB109_PCR12_Ecoli_NOTEX_replicate4
b0003	2877	internal	PCB109_PCR12_Ecoli_NOTEX_replicate4
b0003	3002	internal	PCB109_PCR12_Ecoli_NOTEX_replicate4
b0003	3335	internal	PCB109_PCR12_Ecoli_NOTEX_replicate4
b0003	2877	internal	PCB109_PCR12_Ecoli_TEX_replicate4
b0003	3314	internal	PCB109_PCR12_Ecoli_TEX_replicate4
b0004	4786	internal	PCB109_PCR15_Ecoli_NOTEX_replicate5
b0005	5363	internal	PCB109_PCR15_Ecoli_NOTEX_replicate4
b0005	5363	internal	PCB109_PCR15_Ecoli_NOTEX_replicate5
b0005	5363	internal	PCB109_PCR15_Ecoli_TEX_replicate4
b0005	5148	secondary	PCB109_PCR15_Ecoli_TEX_replicate5
b0005	5363	internal	PCB109_PCR15_Ecoli_TEX_replicate5
b0005	5363	internal	PCB109_PCR12_Ecoli_NOTEX_replicate4
b0005	5363	internal	PCB109_PCR12_Ecoli_TEX_replicate4
b0005	5456	internal	DCS109_Ecoli_NOTEX_replicate3
b0006	6317	internal	DCS109_Ecoli_NOTEX_replicate2
b0006	6726	primary	DCS109_Ecoli_NOTEX_replicate2
b0007	6922	internal	PCB109_PCR15_Ecoli_NOTEX_replicate4
b0007	7482	internal	PCB109_PCR15_Ecoli_NOTEX_replicate4
b0007	6922	internal	PCB109_PCR15_Ecoli_NOTEX_replicate5
b0007	7482	internal	PCB109_PCR15_Ecoli_NOTEX_replicate5
b0007	6922	internal	PCB109_PCR15_Ecoli_TEX_replicate4
b0007	7013	internal	PCB109_PCR15_Ecoli_TEX_replicate4
b0007	7482	internal	PCB109_PCR15_Ecoli_TEX_replicate4
b0007	8054	secondary	PCB109_PCR15_Ecoli_TEX_replicate4
b0007	6922	internal	PCB109_PCR15_Ecoli_TEX_replicate5
b0007	7482	internal	PCB109_PCR15_Ecoli_TEX_replicate5
b0007	8054	secondary	PCB109_PCR15_Ecoli_TEX_replicate5
b0007	6922	internal	PCB109_PCR12_Ecoli_NOTEX_replicate4
b0007	7013	internal	PCB109_PCR12_Ecoli_NOTEX_replicate4
b0007	7482	internal	PCB109_PCR12_Ecoli_NOTEX_replicate4
b0007	8054	secondary	PCB109_PCR12_Ecoli_NOTEX_replicate4
b0007	6922	internal	PCB109_PCR12_Ecoli_TEX_replicate4
b0007	7482	internal	PCB109_PCR12_Ecoli_TEX_replicate4
b0007	6726	internal	DCS109_Ecoli_NOTEX_replicate2
b0007	8054	primary	DCS109_Ecoli_NOTEX_replicate3
b0008	8205	primary	RNA001_Ecoli_TEX_replicate1
b0008	8352	internal	PCB109_PCR15_Ecoli_NOTEX_replicate4
b0008	8588	internal	PCB109_PCR15_Ecoli_NOTEX_replicate4
b0008	8934	internal	PCB109_PCR15_Ecoli_NOTEX_replicate4
b0008	8708	internal	PCB109_PCR15_Ecoli_NOTEX_replicate5
b0008	8672	internal	PCB109_PCR15_Ecoli_TEX_replicate4
b0008	8934	internal	PCB109_PCR15_Ecoli_TEX_replicate4
b0008	8708	internal	PCB109_PCR15_Ecoli_TEX_replicate5
b0008	8352	internal	PCB109_PCR12_Ecoli_NOTEX_replicate4
b0008	8588	internal	PCB109_PCR12_Ecoli_NOTEX_replicate4
b0008	8708	internal	PCB109_PCR12_Ecoli_NOTEX_replicate4
b0008	8934	internal	PCB109_PCR12_Ecoli_NOTEX_replicate4
b0008	8708	internal	PCB109_PCR12_Ecoli_TEX_replicate4
b0008	8679	internal	DCS109_Ecoli_NOTEX_replicate2
b0008	8764	internal	DCS109_Ecoli_NOTEX_replicate2
b0008	8952	internal	DCS109_Ecoli_NOTEX_replicate2
b0008	8387	internal	DCS109_Ecoli_NOTEX_replicate3
b0008	8626	internal	DCS109_Ecoli_NOTEX_replicate3
b0008	8708	internal	DCS109_Ecoli_NOTEX_replicate3
b0008	8765	internal	DCS109_Ecoli_NOTEX_replicate3
b0008	8927	internal	DCS109_Ecoli_NOTEX_replicate3
b0008	8952	internal	DCS109_Ecoli_NOTEX_replicate3
b0008	8206	primary	RNA002_Ecoli_NOTEX_replicate2
b0009	9807	internal	PCB109_PCR15_Ecoli_NOTEX_replicate4
b0009	9894	rest	PCB109_PCR15_Ecoli_NOTEX_replicate4
b0009	9894	rest	PCB109_PCR15_Ecoli_NOTEX_replicate5
b0009	9807	internal	PCB109_PCR15_Ecoli_TEX_replicate4
b0009	9893	rest	PCB109_PCR15_Ecoli_TEX_replicate5
b0009	9277	primary	PCB109_PCR12_Ecoli_NOTEX_replicate4
b0009	9778	internal	PCB109_PCR12_Ecoli_TEX_replicate4
b0009	9894	rest	PCB109_PCR12_Ecoli_TEX_replicate4
b0009	9430	internal	DCS109_Ecoli_NOTEX_replicate2
b0009	9707	internal	DCS109_Ecoli_NOTEX_replicate2
b0009	9894	rest	DCS109_Ecoli_NOTEX_replicate2
b0009	9430	internal	DCS109_Ecoli_NOTEX_replicate3
b0009	9707	internal	DCS109_Ecoli_NOTEX_replicate3
b0009	9894	rest	DCS109_Ecoli_NOTEX_replicate3
b0010	10549	primary	RNA001_Ecoli_TEX_replicate1
b0010	10331	internal	PCB109_PCR15_Ecoli_NOTEX_replicate4
b0010	10564	primary	PCB109_PCR15_Ecoli_NOTEX_replicate4
b0010	10233	internal	PCB109_PCR15_Ecoli_NOTEX_replicate5
b0010	10331	internal	PCB109_PCR15_Ecoli_NOTEX_replicate5
b0010	10477	internal	PCB109_PCR15_Ecoli_NOTEX_replicate5
b0010	10564	primary	PCB109_PCR15_Ecoli_NOTEX_replicate5
b0010	10340	internal	PCB109_PCR15_Ecoli_TEX_replicate4
b0010	10477	internal	PCB109_PCR15_Ecoli_TEX_replicate4
b0010	10564	primary	PCB109_PCR15_Ecoli_TEX_replicate4
b0010	10233	internal	PCB109_PCR15_Ecoli_TEX_replicate5
b0010	10372	internal	PCB109_PCR15_Ecoli_TEX_replicate5
b0010	10477	internal	PCB109_PCR15_Ecoli_TEX_replicate5
b0010	10564	primary	PCB109_PCR15_Ecoli_TEX_replicate5
b0010	10372	internal	PCB109_PCR12_Ecoli_NOTEX_replicate4
b0010	10564	primary	PCB109_PCR12_Ecoli_NOTEX_replicate4
b0010	10564	primary	PCB109_PCR12_Ecoli_TEX_replicate4
b0010	10564	primary	DCS109_Ecoli_NOTEX_replicate3
b0014	12061	secondary	RNA001_Ecoli_TEX_replicate1
b0014	12325	internal	RNA001_Ecoli_TEX_replicate1
b0014	12783	internal	RNA001_Ecoli_TEX_replicate1
b0014	13307	internal	RNA001_Ecoli_TEX_replicate1
b0014	13560	internal	RNA001_Ecoli_TEX_replicate1
b0014	13626	internal	RNA001_Ecoli_TEX_replicate1
b0014	13678	internal	RNA001_Ecoli_TEX_replicate1
b0014	13774	internal	RNA001_Ecoli_TEX_replicate1
b0014	13991	internal	RNA001_Ecoli_TEX_replicate1
b0014	12122	secondary	PCB109_PCR15_Ecoli_NOTEX_replicate4
b0014	12441	internal	PCB109_PCR15_Ecoli_NOTEX_replicate4
b0014	12891	internal	PCB109_PCR15_Ecoli_NOTEX_replicate4
b0014	13052	internal	PCB109_PCR15_Ecoli_NOTEX_replicate4
b0014	13220	internal	PCB109_PCR15_Ecoli_NOTEX_replicate4
b0014	13282	internal	PCB109_PCR15_Ecoli_NOTEX_replicate4
b0014	13522	internal	PCB109_PCR15_Ecoli_NOTEX_replicate4
b0014	13766	internal	PCB109_PCR15_Ecoli_NOTEX_replicate4
b0014	12313	internal	PCB109_PCR15_Ecoli_NOTEX_replicate5
b0014	13282	internal	PCB109_PCR15_Ecoli_NOTEX_replicate5
b0014	13554	internal	PCB109_PCR15_Ecoli_NOTEX_replicate5
b0014	12441	internal	PCB109_PCR15_Ecoli_TEX_replicate4
b0014	12891	internal	PCB109_PCR15_Ecoli_TEX_replicate4
b0014	13052	internal	PCB109_PCR15_Ecoli_TEX_replicate4
b0014	13220	internal	PCB109_PCR15_Ecoli_TEX_replicate4
b0014	13282	internal	PCB109_PCR15_Ecoli_TEX_replicate4
b0014	13334	internal	PCB109_PCR15_Ecoli_TEX_replicate4
b0014	13374	internal	PCB109_PCR15_Ecoli_TEX_replicate4
b0014	13637	internal	PCB109_PCR15_Ecoli_TEX_replicate4
b0014	13876	internal	PCB109_PCR15_Ecoli_TEX_replicate4
b0014	12313	internal	PCB109_PCR15_Ecoli_TEX_replicate5
b0014	13296	internal	PCB109_PCR15_Ecoli_TEX_replicate5
b0014	13554	internal	PCB109_PCR15_Ecoli_TEX_replicate5
b0014	13776	internal	PCB109_PCR15_Ecoli_TEX_replicate5
b0014	12049	secondary	PCB109_PCR12_Ecoli_NOTEX_replicate4
b0014	12122	secondary	PCB109_PCR12_Ecoli_NOTEX_replicate4
b0014	12396	internal	PCB109_PCR12_Ecoli_NOTEX_replicate4
b0014	12442	internal	PCB109_PCR12_Ecoli_NOTEX_replicate4
b0014	12529	internal	PCB109_PCR12_Ecoli_NOTEX_replicate4
b0014	12718	internal	PCB109_PCR12_Ecoli_NOTEX_replicate4
b0014	12891	internal	PCB109_PCR12_Ecoli_NOTEX_replicate4
b0014	13052	internal	PCB109_PCR12_Ecoli_NOTEX_replicate4
b0014	13220	internal	PCB109_PCR12_Ecoli_NOTEX_replicate4
b0014	13282	internal	PCB109_PCR12_Ecoli_NOTEX_replicate4
b0014	13334	internal	PCB109_PCR12_Ecoli_NOTEX_replicate4
b0014	13518	internal	PCB109_PCR12_Ecoli_NOTEX_replicate4
b0014	13640	internal	PCB109_PCR12_Ecoli_NOTEX_replicate4
b0014	13766	internal	PCB109_PCR12_Ecoli_NOTEX_replicate4
b0014	13958	internal	PCB109_PCR12_Ecoli_NOTEX_replicate4
b0014	12313	internal	PCB109_PCR12_Ecoli_TEX_replicate4
b0014	12712	internal	PCB109_PCR12_Ecoli_TEX_replicate4
b0014	12844	internal	PCB109_PCR12_Ecoli_TEX_replicate4
b0014	13082	internal	PCB109_PCR12_Ecoli_TEX_replicate4
b0014	13220	internal	PCB109_PCR12_Ecoli_TEX_replicate4
b0014	13263	internal	PCB109_PCR12_Ecoli_TEX_replicate4
b0014	13296	internal	PCB109_PCR12_Ecoli_TEX_replicate4
b0014	13332	internal	PCB109_PCR12_Ecoli_TEX_replicate4
b0014	13524	internal	PCB109_PCR12_Ecoli_TEX_replicate4
b0014	13554	internal	PCB109_PCR12_Ecoli_TEX_replicate4
b0014	12049	secondary	DCS109_Ecoli_NOTEX_replicate2
b0014	12116	primary	DCS109_Ecoli_NOTEX_replicate2
b0014	12195	internal	DCS109_Ecoli_NOTEX_replicate2
b0014	12288	internal	DCS109_Ecoli_NOTEX_replicate2
b0014	12573	internal	DCS109_Ecoli_NOTEX_replicate2
b0014	12908	internal	DCS109_Ecoli_NOTEX_replicate2
b0014	13245	internal	DCS109_Ecoli_NOTEX_replicate2
b0014	13291	internal	DCS109_Ecoli_NOTEX_replicate2
b0014	13405	internal	DCS109_Ecoli_NOTEX_replicate2
b0014	13434	internal	DCS109_Ecoli_NOTEX_replicate2
b0014	13539	internal	DCS109_Ecoli_NOTEX_replicate2
b0014	13576	internal	DCS109_Ecoli_NOTEX_replicate2
b0014	13672	internal	DCS109_Ecoli_NOTEX_replicate2
b0014	12116	primary	DCS109_Ecoli_NOTEX_replicate3
b0014	12142	secondary	DCS109_Ecoli_NOTEX_replicate3
b0014	12195	internal	DCS109_Ecoli_NOTEX_replicate3
b0014	12288	internal	DCS109_Ecoli_NOTEX_replicate3
b0014	13245	internal	DCS109_Ecoli_NOTEX_replicate3
b0014	13405	internal	DCS109_Ecoli_NOTEX_replicate3
b0014	13465	internal	DCS109_Ecoli_NOTEX_replicate3
b0014	13614	internal	DCS109_Ecoli_NOTEX_replicate3
b0014	13672	internal	DCS109_Ecoli_NOTEX_replicate3
b0014	12059	primary	RNA002_Ecoli_NOTEX_replicate2
b0015	13991	primary	RNA001_Ecoli_TEX_replicate1
b0015	15122	internal	RNA001_Ecoli_TEX_replicate1
b0015	14689	internal	PCB109_PCR15_Ecoli_NOTEX_replicate4
b0015	14992	internal	PCB109_PCR15_Ecoli_NOTEX_replicate4
b0015	14111	secondary	PCB109_PCR15_Ecoli_NOTEX_replicate5
b0015	14689	internal	PCB109_PCR15_Ecoli_NOTEX_replicate5
b0015	14992	internal	PCB109_PCR15_Ecoli_NOTEX_replicate5
b0015	15124	internal	PCB109_PCR15_Ecoli_NOTEX_replicate5
b0015	13876	secondary	PCB109_PCR15_Ecoli_TEX_replicate4
b0015	14689	internal	PCB109_PCR15_Ecoli_TEX_replicate4
b0015	14111	secondary	PCB109_PCR15_Ecoli_TEX_replicate5
b0015	14689	internal	PCB109_PCR15_Ecoli_TEX_replicate5
b0015	13958	secondary	PCB109_PCR12_Ecoli_NOTEX_replicate4
b0015	14111	secondary	PCB109_PCR12_Ecoli_NOTEX_replicate4
b0015	14151	secondary	PCB109_PCR12_Ecoli_NOTEX_replicate4
b0015	14239	internal	PCB109_PCR12_Ecoli_NOTEX_replicate4
b0015	14689	internal	PCB109_PCR12_Ecoli_NOTEX_replicate4
b0015	14720	internal	PCB109_PCR12_Ecoli_NOTEX_replicate4
b0015	14992	internal	PCB109_PCR12_Ecoli_NOTEX_replicate4
b0015	14111	secondary	PCB109_PCR12_Ecoli_TEX_replicate4
b0015	14375	internal	PCB109_PCR12_Ecoli_TEX_replicate4
b0015	14404	internal	PCB109_PCR12_Ecoli_TEX_replicate4
b0015	14689	internal	PCB109_PCR12_Ecoli_TEX_replicate4
b0015	14822	internal	PCB109_PCR12_Ecoli_TEX_replicate4
b0015	14992	internal	PCB109_PCR12_Ecoli_TEX_replicate4
b0015	15124	internal	PCB109_PCR12_Ecoli_TEX_replicate4
b0015	14693	internal	DCS109_Ecoli_NOTEX_replicate2
b0016	15378	primary	PCB109_PCR15_Ecoli_NOTEX_replicate5
b0016	15441	primary	PCB109_PCR15_Ecoli_TEX_replicate5
b0016	15444	primary	PCB109_PCR12_Ecoli_NOTEX_replicate4
b0018	17042	primary	RNA001_Ecoli_TEX_replicate1
b0018	17053	primary	PCB109_PCR15_Ecoli_NOTEX_replicate4
b0018	17053	primary	PCB109_PCR15_Ecoli_NOTEX_replicate5
b0018	17053	primary	PCB109_PCR15_Ecoli_TEX_replicate4
b0018	17053	primary	PCB109_PCR15_Ecoli_TEX_replicate5
b0018	17053	primary	PCB109_PCR12_Ecoli_NOTEX_replicate4
b0018	17053	primary	PCB109_PCR12_Ecoli_TEX_replicate4
b0018	17139	secondary	PCB109_PCR12_Ecoli_TEX_replicate4
b0018	17053	primary	DCS109_Ecoli_NOTEX_replicate2
b0018	17053	primary	DCS109_Ecoli_NOTEX_replicate3
b0019	17310	secondary	PCB109_PCR15_Ecoli_NOTEX_replicate4
b0019	17791	internal	PCB109_PCR15_Ecoli_NOTEX_replicate4
b0019	18391	internal	PCB109_PCR15_Ecoli_NOTEX_replicate4
b0019	17310	secondary	PCB109_PCR15_Ecoli_NOTEX_replicate5
b0019	17549	internal	PCB109_PCR15_Ecoli_NOTEX_replicate5
b0019	17791	internal	PCB109_PCR15_Ecoli_NOTEX_replicate5
b0019	18391	internal	PCB109_PCR15_Ecoli_NOTEX_replicate5
b0019	18565	internal	PCB109_PCR15_Ecoli_NOTEX_replicate5
b0019	17310	secondary	PCB109_PCR15_Ecoli_TEX_replicate4
b0019	17791	internal	PCB109_PCR15_Ecoli_TEX_replicate4
b0019	17838	internal	PCB109_PCR15_Ecoli_TEX_replicate4
b0019	17549	internal	PCB109_PCR15_Ecoli_TEX_replicate5
b0019	18554	internal	PCB109_PCR15_Ecoli_TEX_replicate5
b0019	17791	internal	PCB109_PCR12_Ecoli_NOTEX_replicate4
b0019	18391	internal	PCB109_PCR12_Ecoli_NOTEX_replicate4
b0019	18122	internal	PCB109_PCR12_Ecoli_TEX_replicate4
b0019	17520	internal	DCS109_Ecoli_NOTEX_replicate2
b0019	17310	primary	DCS109_Ecoli_NOTEX_replicate3
b0020	18565	primary	PCB109_PCR15_Ecoli_NOTEX_replicate5
b0020	18554	primary	PCB109_PCR15_Ecoli_TEX_replicate5
b0021	20332	primary	PCB109_PCR15_Ecoli_TEX_replicate5
b0022	20524	primary	PCB109_PCR12_Ecoli_NOTEX_replicate4
b0022	20524	primary	PCB109_PCR12_Ecoli_TEX_replicate4
b0022	20524	primary	DCS109_Ecoli_NOTEX_replicate2
b0022	20524	primary	DCS109_Ecoli_NOTEX_replicate3
b0023	20897	internal	RNA001_Ecoli_TEX_replicate1
b0023	21103	secondary	RNA001_Ecoli_TEX_replicate1
b0023	21196	secondary	RNA001_Ecoli_TEX_replicate1
b0023	20911	internal	PCB109_PCR15_Ecoli_NOTEX_replicate4
b0023	20955	internal	PCB109_PCR15_Ecoli_NOTEX_replicate4
b0023	21091	secondary	PCB109_PCR15_Ecoli_NOTEX_replicate4
b0023	21130	primary	PCB109_PCR15_Ecoli_NOTEX_replicate4
b0023	21207	secondary	PCB109_PCR15_Ecoli_NOTEX_replicate4
b0023	21130	primary	PCB109_PCR15_Ecoli_NOTEX_replicate5
b0023	20911	internal	PCB109_PCR15_Ecoli_TEX_replicate4
b0023	21130	primary	PCB109_PCR15_Ecoli_TEX_replicate4
b0023	21159	secondary	PCB109_PCR15_Ecoli_TEX_replicate4
b0023	21208	secondary	PCB109_PCR15_Ecoli_TEX_replicate4
b0023	20911	internal	PCB109_PCR12_Ecoli_NOTEX_replicate4
b0023	21091	secondary	PCB109_PCR12_Ecoli_NOTEX_replicate4
b0023	21130	primary	PCB109_PCR12_Ecoli_NOTEX_replicate4
b0023	21130	primary	PCB109_PCR12_Ecoli_TEX_replicate4
b0023	21208	secondary	PCB109_PCR12_Ecoli_TEX_replicate4
b0023	20888	internal	DCS109_Ecoli_NOTEX_replicate2
b0023	20896	internal	DCS109_Ecoli_NOTEX_replicate2
b0023	20992	internal	DCS109_Ecoli_NOTEX_replicate2
b0023	21011	internal	DCS109_Ecoli_NOTEX_replicate2
b0023	21117	primary	DCS109_Ecoli_NOTEX_replicate2
b0023	21177	secondary	DCS109_Ecoli_NOTEX_replicate2
b0023	20896	internal	DCS109_Ecoli_NOTEX_replicate3
b0023	21011	internal	DCS109_Ecoli_NOTEX_replicate3
b0023	21061	internal	DCS109_Ecoli_NOTEX_replicate3
b0023	21130	primary	DCS109_Ecoli_NOTEX_replicate3
b0023	21208	secondary	DCS109_Ecoli_NOTEX_replicate3
b0023	21101	secondary	RNA002_Ecoli_NOTEX_replicate2
b0023	21193	primary	RNA002_Ecoli_NOTEX_replicate2
b0023	21107	primary	RNA002_Ecoli_NOTEX_replicate3
b0024	20919	secondary	PCB109_PCR15_Ecoli_NOTEX_replicate4
b0024	21383	internal	PCB109_PCR15_Ecoli_NOTEX_replicate4
b0024	21383	internal	PCB109_PCR15_Ecoli_NOTEX_replicate5
b0024	21383	internal	PCB109_PCR15_Ecoli_TEX_replicate4
b0024	21383	internal	PCB109_PCR15_Ecoli_TEX_replicate5
b0024	21383	internal	PCB109_PCR12_Ecoli_NOTEX_replicate4
b0024	21383	internal	PCB109_PCR12_Ecoli_TEX_replicate4
b0024	20914	secondary	DCS109_Ecoli_NOTEX_replicate2
b0024	20941	secondary	DCS109_Ecoli_NOTEX_replicate2
b0024	21017	secondary	DCS109_Ecoli_NOTEX_replicate2
b0024	21045	secondary	DCS109_Ecoli_NOTEX_replicate2
b0024	21383	internal	DCS109_Ecoli_NOTEX_replicate2
b0024	20913	secondary	DCS109_Ecoli_NOTEX_replicate3
b0024	20963	secondary	DCS109_Ecoli_NOTEX_replicate3
b0024	21049	secondary	DCS109_Ecoli_NOTEX_replicate3
b0024	21383	internal	DCS109_Ecoli_NOTEX_replicate3
b0025	21846	internal	RNA001_Ecoli_TEX_replicate1
b0025	21383	primary	PCB109_PCR15_Ecoli_NOTEX_replicate4
b0025	21835	internal	PCB109_PCR15_Ecoli_NOTEX_replicate4
b0025	22022	internal	PCB109_PCR15_Ecoli_NOTEX_replicate4
b0025	22092	internal	PCB109_PCR15_Ecoli_NOTEX_replicate4
b0025	21383	primary	PCB109_PCR15_Ecoli_NOTEX_replicate5
b0025	21833	internal	PCB109_PCR15_Ecoli_NOTEX_replicate5
b0025	21961	internal	PCB109_PCR15_Ecoli_NOTEX_replicate5
b0025	22092	internal	PCB109_PCR15_Ecoli_NOTEX_replicate5
b0025	21383	primary	PCB109_PCR15_Ecoli_TEX_replicate4
b0025	22092	internal	PCB109_PCR15_Ecoli_TEX_replicate4
b0025	21383	primary	PCB109_PCR15_Ecoli_TEX_replicate5
b0025	21833	internal	PCB109_PCR15_Ecoli_TEX_replicate5
b0025	22092	internal	PCB109_PCR15_Ecoli_TEX_replicate5
b0025	21383	primary	PCB109_PCR12_Ecoli_NOTEX_replicate4
b0025	21461	internal	PCB109_PCR12_Ecoli_NOTEX_replicate4
b0025	21835	internal	PCB109_PCR12_Ecoli_NOTEX_replicate4
b0025	22022	internal	PCB109_PCR12_Ecoli_NOTEX_replicate4
b0025	22092	internal	PCB109_PCR12_Ecoli_NOTEX_replicate4
b0025	21383	primary	PCB109_PCR12_Ecoli_TEX_replicate4
b0025	21556	internal	PCB109_PCR12_Ecoli_TEX_replicate4
b0025	21835	internal	PCB109_PCR12_Ecoli_TEX_replicate4
b0025	22092	internal	PCB109_PCR12_Ecoli_TEX_replicate4
b0025	21383	primary	DCS109_Ecoli_NOTEX_replicate2
b0025	21463	internal	DCS109_Ecoli_NOTEX_replicate2
b0025	21876	internal	DCS109_Ecoli_NOTEX_replicate2
b0025	22049	internal	DCS109_Ecoli_NOTEX_replicate2
b0025	21383	primary	DCS109_Ecoli_NOTEX_replicate3
b0025	21630	internal	DCS109_Ecoli_NOTEX_replicate3
b0025	21751	internal	DCS109_Ecoli_NOTEX_replicate3
b0025	21833	internal	DCS109_Ecoli_NOTEX_replicate3
b0025	21995	internal	DCS109_Ecoli_NOTEX_replicate3
b0025	22049	internal	DCS109_Ecoli_NOTEX_replicate3
b0025	22245	internal	DCS109_Ecoli_NOTEX_replicate3
b0026	24703	internal	RNA001_Ecoli_TEX_replicate1
b0026	22092	secondary	PCB109_PCR15_Ecoli_NOTEX_replicate4
b0026	22671	internal	PCB109_PCR15_Ecoli_NOTEX_replicate4
b0026	24447	internal	PCB109_PCR15_Ecoli_NOTEX_replicate4
b0026	24952	internal	PCB109_PCR15_Ecoli_NOTEX_replicate4
b0026	25013	internal	PCB109_PCR15_Ecoli_NOTEX_replicate4
b0026	22092	secondary	PCB109_PCR15_Ecoli_NOTEX_replicate5
b0026	24447	internal	PCB109_PCR15_Ecoli_NOTEX_replicate5
b0026	24952	internal	PCB109_PCR15_Ecoli_NOTEX_replicate5
b0026	25013	internal	PCB109_PCR15_Ecoli_NOTEX_replicate5
b0026	22092	secondary	PCB109_PCR15_Ecoli_TEX_replicate4
b0026	22671	internal	PCB109_PCR15_Ecoli_TEX_replicate4
b0026	24447	internal	PCB109_PCR15_Ecoli_TEX_replicate4
b0026	24952	internal	PCB109_PCR15_Ecoli_TEX_replicate4
b0026	25013	internal	PCB109_PCR15_Ecoli_TEX_replicate4
b0026	22092	secondary	PCB109_PCR15_Ecoli_TEX_replicate5
b0026	22519	internal	PCB109_PCR15_Ecoli_TEX_replicate5
b0026	22671	internal	PCB109_PCR15_Ecoli_TEX_replicate5
b0026	24447	internal	PCB109_PCR15_Ecoli_TEX_replicate5
b0026	24952	internal	PCB109_PCR15_Ecoli_TEX_replicate5
b0026	25013	internal	PCB109_PCR15_Ecoli_TEX_replicate5
b0026	22092	secondary	PCB109_PCR12_Ecoli_NOTEX_replicate4
b0026	22519	internal	PCB109_PCR12_Ecoli_NOTEX_replicate4
b0026	22671	internal	PCB109_PCR12_Ecoli_NOTEX_replicate4
b0026	24447	internal	PCB109_PCR12_Ecoli_NOTEX_replicate4
b0026	24704	internal	PCB109_PCR12_Ecoli_NOTEX_replicate4
b0026	24952	internal	PCB109_PCR12_Ecoli_NOTEX_replicate4
b0026	25013	internal	PCB109_PCR12_Ecoli_NOTEX_replicate4
b0026	22092	secondary	PCB109_PCR12_Ecoli_TEX_replicate4
b0026	22519	internal	PCB109_PCR12_Ecoli_TEX_replicate4
b0026	22671	internal	PCB109_PCR12_Ecoli_TEX_replicate4
b0026	24447	internal	PCB109_PCR12_Ecoli_TEX_replicate4
b0026	24952	internal	PCB109_PCR12_Ecoli_TEX_replicate4
b0026	25013	internal	PCB109_PCR12_Ecoli_TEX_replicate4
b0026	22587	internal	DCS109_Ecoli_NOTEX_replicate2
b0026	24454	internal	DCS109_Ecoli_NOTEX_replicate2
b0026	25013	internal	DCS109_Ecoli_NOTEX_replicate2
b0026	22245	secondary	DCS109_Ecoli_NOTEX_replicate3
b0026	23792	internal	DCS109_Ecoli_NOTEX_replicate3
b0026	23933	internal	DCS109_Ecoli_NOTEX_replicate3
b0026	24198	internal	DCS109_Ecoli_NOTEX_replicate3
b0026	24454	internal	DCS109_Ecoli_NOTEX_replicate3
b0026	25020	internal	DCS109_Ecoli_NOTEX_replicate3
b0027	24952	primary	PCB109_PCR15_Ecoli_NOTEX_replicate4
b0027	25013	secondary	PCB109_PCR15_Ecoli_NOTEX_replicate4
b0027	25654	internal	PCB109_PCR15_Ecoli_NOTEX_replicate4
b0027	24952	primary	PCB109_PCR15_Ecoli_NOTEX_replicate5
b0027	25013	secondary	PCB109_PCR15_Ecoli_NOTEX_replicate5
b0027	25261	internal	PCB109_PCR15_Ecoli_NOTEX_replicate5
b0027	25654	internal	PCB109_PCR15_Ecoli_NOTEX_replicate5
b0027	24952	primary	PCB109_PCR15_Ecoli_TEX_replicate4
b0027	25013	secondary	PCB109_PCR15_Ecoli_TEX_replicate4
b0027	25654	internal	PCB109_PCR15_Ecoli_TEX_replicate4
b0027	24952	primary	PCB109_PCR15_Ecoli_TEX_replicate5
b0027	25013	secondary	PCB109_PCR15_Ecoli_TEX_replicate5
b0027	25455	internal	PCB109_PCR15_Ecoli_TEX_replicate5
b0027	25654	internal	PCB109_PCR15_Ecoli_TEX_replicate5
b0027	24952	primary	PCB109_PCR12_Ecoli_NOTEX_replicate4
b0027	25013	secondary	PCB109_PCR12_Ecoli_NOTEX_replicate4
b0027	25369	internal	PCB109_PCR12_Ecoli_NOTEX_replicate4
b0027	25654	internal	PCB109_PCR12_Ecoli_NOTEX_replicate4
b0027	24952	secondary	PCB109_PCR12_Ecoli_TEX_replicate4
b0027	25013	primary	PCB109_PCR12_Ecoli_TEX_replicate4
b0027	25261	internal	PCB109_PCR12_Ecoli_TEX_replicate4
b0027	25654	internal	PCB109_PCR12_Ecoli_TEX_replicate4
b0027	25013	primary	DCS109_Ecoli_NOTEX_replicate2
b0027	25670	internal	DCS109_Ecoli_NOTEX_replicate2
b0027	25020	primary	DCS109_Ecoli_NOTEX_replicate3
b0027	25670	internal	DCS109_Ecoli_NOTEX_replicate3
b0028	25654	secondary	PCB109_PCR15_Ecoli_NOTEX_replicate4
b0028	25979	internal	PCB109_PCR15_Ecoli_NOTEX_replicate4
b0028	25654	secondary	PCB109_PCR15_Ecoli_NOTEX_replicate5
b0028	25979	internal	PCB109_PCR15_Ecoli_NOTEX_replicate5
b0028	25979	internal	PCB109_PCR15_Ecoli_TEX_replicate4
b0028	25654	secondary	PCB109_PCR15_Ecoli_TEX_replicate5
b0028	25979	internal	PCB109_PCR15_Ecoli_TEX_replicate5
b0028	25654	secondary	PCB109_PCR12_Ecoli_NOTEX_replicate4
b0028	25979	internal	PCB109_PCR12_Ecoli_NOTEX_replicate4
b0028	25654	secondary	PCB109_PCR12_Ecoli_TEX_replicate4
b0028	25979	internal	PCB109_PCR12_Ecoli_TEX_replicate4
b0029	25979	primary	PCB109_PCR15_Ecoli_NOTEX_replicate4
b0029	25979	primary	PCB109_PCR15_Ecoli_NOTEX_replicate5
b0029	25979	primary	PCB109_PCR15_Ecoli_TEX_replicate4
b0029	25979	primary	PCB109_PCR15_Ecoli_TEX_replicate5
b0029	25979	primary	PCB109_PCR12_Ecoli_NOTEX_replicate4
b0029	25979	primary	PCB109_PCR12_Ecoli_TEX_replicate4
b0030	27485	internal	PCB109_PCR15_Ecoli_NOTEX_replicate5
b0030	27256	primary	PCB109_PCR12_Ecoli_NOTEX_replicate4
b0030	27485	internal	PCB109_PCR12_Ecoli_TEX_replicate4
b0030	27256	primary	DCS109_Ecoli_NOTEX_replicate2
b0030	27256	primary	DCS109_Ecoli_NOTEX_replicate3
b0031	28343	primary	PCB109_PCR15_Ecoli_NOTEX_replicate4
b0031	28343	primary	PCB109_PCR15_Ecoli_NOTEX_replicate5
b0031	28287	secondary	PCB109_PCR15_Ecoli_TEX_replicate4
b0031	28343	primary	PCB109_PCR15_Ecoli_TEX_replicate4
b0031	28343	primary	PCB109_PCR15_Ecoli_TEX_replicate5
b0031	28287	secondary	PCB109_PCR12_Ecoli_NOTEX_replicate4
b0031	28343	primary	PCB109_PCR12_Ecoli_NOTEX_replicate4
b0031	28343	primary	PCB109_PCR12_Ecoli_TEX_replicate4
b0031	28508	internal	PCB109_PCR12_Ecoli_TEX_replicate4
b0031	28343	primary	DCS109_Ecoli_NOTEX_replicate2
b0031	28343	primary	DCS109_Ecoli_NOTEX_replicate3
b0032	30477	internal	DCS109_Ecoli_NOTEX_replicate3
b0033	33755	internal	PCB109_PCR12_Ecoli_NOTEX_replicate4
b0034	34194	primary	PCB109_PCR15_Ecoli_NOTEX_replicate4
b0034	34194	primary	PCB109_PCR15_Ecoli_NOTEX_replicate5
b0034	34194	primary	PCB109_PCR15_Ecoli_TEX_replicate5
b0034	34194	primary	PCB109_PCR12_Ecoli_NOTEX_replicate4
b0034	34194	primary	PCB109_PCR12_Ecoli_TEX_replicate4
b0035	34914	internal	PCB109_PCR15_Ecoli_NOTEX_replicate4
b0035	34831	internal	PCB109_PCR15_Ecoli_NOTEX_replicate5
b0035	34914	internal	PCB109_PCR15_Ecoli_NOTEX_replicate5
b0035	34914	internal	PCB109_PCR15_Ecoli_TEX_replicate4
b0035	34914	internal	PCB109_PCR15_Ecoli_TEX_replicate5
b0035	34914	internal	PCB109_PCR12_Ecoli_NOTEX_replicate4
b0035	34914	internal	PCB109_PCR12_Ecoli_TEX_replicate4
b0035	34914	internal	DCS109_Ecoli_NOTEX_replicate3
b0037	37657	internal	PCB109_PCR12_Ecoli_NOTEX_replicate4
b0039	39924	internal	RNA001_Ecoli_TEX_replicate1
b0039	39928	internal	RNA001_Ecoli_TEX_replicate1
b0039	39883	internal	DCS109_Ecoli_NOTEX_replicate2
b0041	42434	internal	PCB109_PCR12_Ecoli_NOTEX_replicate4
b0045	46086	internal	PCB109_PCR15_Ecoli_TEX_replicate5
b0045	46330	internal	PCB109_PCR15_Ecoli_TEX_replicate5
b0047	48343	internal	PCB109_PCR15_Ecoli_NOTEX_replicate4
b0047	48343	internal	PCB109_PCR15_Ecoli_NOTEX_replicate5
b0047	48343	internal	PCB109_PCR15_Ecoli_TEX_replicate4
b0047	48343	internal	PCB109_PCR15_Ecoli_TEX_replicate5
b0047	48343	internal	PCB109_PCR12_Ecoli_NOTEX_replicate4
b0047	48343	internal	PCB109_PCR12_Ecoli_TEX_replicate4
b0048	49960	internal	PCB109_PCR15_Ecoli_NOTEX_replicate4
b0048	49960	internal	PCB109_PCR15_Ecoli_TEX_replicate4
b0048	49960	internal	PCB109_PCR15_Ecoli_TEX_replicate5
b0048	49960	internal	PCB109_PCR12_Ecoli_NOTEX_replicate4
b0048	50118	internal	PCB109_PCR12_Ecoli_TEX_replicate4
b0048	49801	primary	DCS109_Ecoli_NOTEX_replicate2
b0048	50118	internal	DCS109_Ecoli_NOTEX_replicate3
b0048	50180	internal	DCS109_Ecoli_NOTEX_replicate3
b0049	50481	internal	PCB109_PCR15_Ecoli_NOTEX_replicate4
b0049	51002	internal	PCB109_PCR15_Ecoli_NOTEX_replicate4
b0049	51038	internal	PCB109_PCR15_Ecoli_NOTEX_replicate4
b0049	50481	internal	PCB109_PCR15_Ecoli_NOTEX_replicate5
b0049	50720	internal	PCB109_PCR15_Ecoli_NOTEX_replicate5
b0049	51002	internal	PCB109_PCR15_Ecoli_NOTEX_replicate5
b0049	51099	internal	PCB109_PCR15_Ecoli_NOTEX_replicate5
b0049	50481	internal	PCB109_PCR15_Ecoli_TEX_replicate4
b0049	51002	internal	PCB109_PCR15_Ecoli_TEX_replicate4
b0049	50481	internal	PCB109_PCR15_Ecoli_TEX_replicate5
b0049	51002	internal	PCB109_PCR15_Ecoli_TEX_replicate5
b0049	51099	internal	PCB109_PCR15_Ecoli_TEX_replicate5
b0049	50481	internal	PCB109_PCR12_Ecoli_NOTEX_replicate4
b0049	51038	internal	PCB109_PCR12_Ecoli_NOTEX_replicate4
b0049	51491	secondary	PCB109_PCR12_Ecoli_NOTEX_replicate4
b0049	50453	internal	PCB109_PCR12_Ecoli_TEX_replicate4
b0049	50481	internal	PCB109_PCR12_Ecoli_TEX_replicate4
b0049	50716	internal	PCB109_PCR12_Ecoli_TEX_replicate4
b0049	51002	internal	PCB109_PCR12_Ecoli_TEX_replicate4
b0049	51099	internal	PCB109_PCR12_Ecoli_TEX_replicate4
b0049	51141	internal	PCB109_PCR12_Ecoli_TEX_replicate4
b0050	51822	primary	PCB109_PCR15_Ecoli_NOTEX_replicate5
b0050	51663	primary	PCB109_PCR15_Ecoli_TEX_replicate4
b0050	51491	internal	PCB109_PCR12_Ecoli_NOTEX_replicate4
b0050	51555	internal	PCB109_PCR12_Ecoli_TEX_replicate4
b0050	51598	internal	DCS109_Ecoli_NOTEX_replicate3
b0051	52576	primary	RNA001_Ecoli_TEX_replicate1
b0051	52562	secondary	PCB109_PCR15_Ecoli_NOTEX_replicate4
b0051	52589	primary	PCB109_PCR15_Ecoli_NOTEX_replicate4
b0051	51822	internal	PCB109_PCR15_Ecoli_NOTEX_replicate5
b0051	52589	primary	PCB109_PCR15_Ecoli_NOTEX_replicate5
b0051	51663	internal	PCB109_PCR15_Ecoli_TEX_replicate4
b0051	52589	primary	PCB109_PCR15_Ecoli_TEX_replicate4
b0051	51949	internal	PCB109_PCR15_Ecoli_TEX_replicate5
b0051	52589	primary	PCB109_PCR15_Ecoli_TEX_replicate5
b0051	51949	internal	PCB109_PCR12_Ecoli_NOTEX_replicate4
b0051	52426	internal	PCB109_PCR12_Ecoli_NOTEX_replicate4
b0051	52589	primary	PCB109_PCR12_Ecoli_NOTEX_replicate4
b0051	52589	primary	PCB109_PCR12_Ecoli_TEX_replicate4
b0051	52523	secondary	DCS109_Ecoli_NOTEX_replicate2
b0051	52557	secondary	DCS109_Ecoli_NOTEX_replicate2
b0051	52589	primary	DCS109_Ecoli_NOTEX_replicate2
b0051	52501	secondary	DCS109_Ecoli_NOTEX_replicate3
b0051	52514	secondary	DCS109_Ecoli_NOTEX_replicate3
b0051	52589	primary	DCS109_Ecoli_NOTEX_replicate3
b0052	52576	internal	RNA001_Ecoli_TEX_replicate1
b0052	52562	internal	PCB109_PCR15_Ecoli_NOTEX_replicate4
b0052	52589	internal	PCB109_PCR15_Ecoli_NOTEX_replicate4
b0052	53398	internal	PCB109_PCR15_Ecoli_NOTEX_replicate4
b0052	53564	secondary	PCB109_PCR15_Ecoli_NOTEX_replicate4
b0052	52589	internal	PCB109_PCR15_Ecoli_NOTEX_replicate5
b0052	52589	internal	PCB109_PCR15_Ecoli_TEX_replicate4
b0052	53398	internal	PCB109_PCR15_Ecoli_TEX_replicate4
b0052	53564	secondary	PCB109_PCR15_Ecoli_TEX_replicate4
b0052	52589	internal	PCB109_PCR15_Ecoli_TEX_replicate5
b0052	52589	internal	PCB109_PCR12_Ecoli_NOTEX_replicate4
b0052	53616	secondary	PCB109_PCR12_Ecoli_NOTEX_replicate4
b0052	52589	internal	PCB109_PCR12_Ecoli_TEX_replicate4
b0052	52523	internal	DCS109_Ecoli_NOTEX_replicate2
b0052	52557	internal	DCS109_Ecoli_NOTEX_replicate2
b0052	52589	internal	DCS109_Ecoli_NOTEX_replicate2
b0052	52501	internal	DCS109_Ecoli_NOTEX_replicate3
b0052	52514	internal	DCS109_Ecoli_NOTEX_replicate3
b0052	52589	internal	DCS109_Ecoli_NOTEX_replicate3
b0053	53564	internal	PCB109_PCR15_Ecoli_NOTEX_replicate4
b0053	54008	internal	PCB109_PCR15_Ecoli_NOTEX_replicate4
b0053	54008	internal	PCB109_PCR15_Ecoli_NOTEX_replicate5
b0053	53564	internal	PCB109_PCR15_Ecoli_TEX_replicate4
b0053	53774	internal	PCB109_PCR15_Ecoli_TEX_replicate4
b0053	54593	internal	PCB109_PCR15_Ecoli_TEX_replicate4
b0053	53774	internal	PCB109_PCR15_Ecoli_TEX_replicate5
b0053	54008	internal	PCB109_PCR15_Ecoli_TEX_replicate5
b0053	53616	internal	PCB109_PCR12_Ecoli_NOTEX_replicate4
b0053	53774	internal	PCB109_PCR12_Ecoli_NOTEX_replicate4
b0053	54008	internal	PCB109_PCR12_Ecoli_NOTEX_replicate4
b0053	54593	internal	PCB109_PCR12_Ecoli_NOTEX_replicate4
b0053	53934	internal	PCB109_PCR12_Ecoli_TEX_replicate4
b0053	54008	internal	PCB109_PCR12_Ecoli_TEX_replicate4
b0053	54973	primary	DCS109_Ecoli_NOTEX_replicate2
b0053	54320	internal	DCS109_Ecoli_NOTEX_replicate3
b0053	54702	primary	DCS109_Ecoli_NOTEX_replicate3
b0054	56739	internal	PCB109_PCR15_Ecoli_NOTEX_replicate4
b0054	57241	primary	PCB109_PCR15_Ecoli_NOTEX_replicate4
b0054	56739	internal	PCB109_PCR15_Ecoli_NOTEX_replicate5
b0054	57241	primary	PCB109_PCR15_Ecoli_TEX_replicate4
b0054	56739	internal	PCB109_PCR15_Ecoli_TEX_replicate5
b0054	57241	primary	PCB109_PCR15_Ecoli_TEX_replicate5
b0054	55015	internal	PCB109_PCR12_Ecoli_NOTEX_replicate4
b0054	56739	internal	PCB109_PCR12_Ecoli_NOTEX_replicate4
b0054	54973	internal	DCS109_Ecoli_NOTEX_replicate2
b0054	57241	primary	DCS109_Ecoli_NOTEX_replicate2
b0054	55145	internal	DCS109_Ecoli_NOTEX_replicate3
b0055	57989	internal	PCB109_PCR15_Ecoli_TEX_replicate4
b0055	57318	primary	DCS109_Ecoli_NOTEX_replicate2
b0056	58933	internal	PCB109_PCR15_Ecoli_TEX_replicate4
b0056	58933	internal	PCB109_PCR15_Ecoli_TEX_replicate5
b0056	58933	internal	PCB109_PCR12_Ecoli_NOTEX_replicate4
b0056	58933	internal	PCB109_PCR12_Ecoli_TEX_replicate4
b0057	58933	primary	PCB109_PCR15_Ecoli_TEX_replicate4
b0057	58933	primary	PCB109_PCR15_Ecoli_TEX_replicate5
b0057	58933	primary	PCB109_PCR12_Ecoli_NOTEX_replicate4
b0057	58933	primary	PCB109_PCR12_Ecoli_TEX_replicate4
b0058	60290	internal	PCB109_PCR15_Ecoli_NOTEX_replicate4
b0058	60344	internal	PCB109_PCR15_Ecoli_NOTEX_replicate5
b0058	59837	internal	PCB109_PCR15_Ecoli_TEX_replicate4
b0058	60338	internal	PCB109_PCR15_Ecoli_TEX_replicate4
b0058	60344	internal	PCB109_PCR15_Ecoli_TEX_replicate5
b0058	60338	internal	PCB109_PCR12_Ecoli_NOTEX_replicate4
b0058	60344	internal	PCB109_PCR12_Ecoli_TEX_replicate4
b0058	60338	internal	DCS109_Ecoli_NOTEX_replicate3
b0059	62311	internal	PCB109_PCR15_Ecoli_NOTEX_replicate4
b0059	63449	primary	PCB109_PCR15_Ecoli_NOTEX_replicate4
b0059	63449	primary	PCB109_PCR15_Ecoli_NOTEX_replicate5
b0059	63449	primary	PCB109_PCR15_Ecoli_TEX_replicate4
b0059	63449	primary	PCB109_PCR15_Ecoli_TEX_replicate5
b0059	62311	internal	PCB109_PCR12_Ecoli_NOTEX_replicate4
b0059	63356	secondary	PCB109_PCR12_Ecoli_NOTEX_replicate4
b0059	63449	primary	PCB109_PCR12_Ecoli_NOTEX_replicate4
b0059	61018	internal	PCB109_PCR12_Ecoli_TEX_replicate4
b0059	62311	internal	PCB109_PCR12_Ecoli_TEX_replicate4
b0059	63449	primary	PCB109_PCR12_Ecoli_TEX_replicate4
b0060	63449	internal	PCB109_PCR15_Ecoli_NOTEX_replicate4
b0060	65798	secondary	PCB109_PCR15_Ecoli_NOTEX_replicate4
b0060	63449	internal	PCB109_PCR15_Ecoli_NOTEX_replicate5
b0060	63449	internal	PCB109_PCR15_Ecoli_TEX_replicate4
b0060	65171	internal	PCB109_PCR15_Ecoli_TEX_replicate4
b0060	63449	internal	PCB109_PCR15_Ecoli_TEX_replicate5
b0060	65242	internal	PCB109_PCR15_Ecoli_TEX_replicate5
b0060	65802	secondary	PCB109_PCR15_Ecoli_TEX_replicate5
b0060	63449	internal	PCB109_PCR12_Ecoli_NOTEX_replicate4
b0060	65802	secondary	PCB109_PCR12_Ecoli_NOTEX_replicate4
b0060	63449	internal	PCB109_PCR12_Ecoli_TEX_replicate4
b0060	64086	internal	DCS109_Ecoli_NOTEX_replicate2
b0060	64135	internal	DCS109_Ecoli_NOTEX_replicate2
b0060	65626	internal	DCS109_Ecoli_NOTEX_replicate2
b0065	71315	secondary	PCB109_PCR15_Ecoli_NOTEX_replicate4
b0065	71482	internal	PCB109_PCR15_Ecoli_NOTEX_replicate4
b0065	71904	internal	PCB109_PCR15_Ecoli_NOTEX_replicate4
b0065	71482	internal	PCB109_PCR15_Ecoli_NOTEX_replicate5
b0065	71933	internal	PCB109_PCR15_Ecoli_NOTEX_replicate5
b0065	71482	internal	PCB109_PCR15_Ecoli_TEX_replicate4
b0065	71315	secondary	PCB109_PCR15_Ecoli_TEX_replicate5
b0065	71482	internal	PCB109_PCR15_Ecoli_TEX_replicate5
b0065	71892	internal	PCB109_PCR15_Ecoli_TEX_replicate5
b0065	71482	internal	PCB109_PCR12_Ecoli_NOTEX_replicate4
b0065	71482	internal	PCB109_PCR12_Ecoli_TEX_replicate4
b0065	71489	internal	DCS109_Ecoli_NOTEX_replicate3
b0066	72649	internal	PCB109_PCR12_Ecoli_NOTEX_replicate4
b0066	72649	internal	PCB109_PCR12_Ecoli_TEX_replicate4
b0067	73262	internal	PCB109_PCR15_Ecoli_NOTEX_replicate4
b0067	73262	internal	PCB109_PCR15_Ecoli_TEX_replicate4
b0067	73262	internal	PCB109_PCR15_Ecoli_TEX_replicate5
b0068	74989	internal	PCB109_PCR15_Ecoli_NOTEX_replicate4
b0068	75245	internal	PCB109_PCR15_Ecoli_NOTEX_replicate4
b0068	75608	primary	PCB109_PCR15_Ecoli_NOTEX_replicate4
b0068	74989	internal	PCB109_PCR15_Ecoli_NOTEX_replicate5
b0068	75245	internal	PCB109_PCR15_Ecoli_NOTEX_replicate5
b0068	75608	primary	PCB109_PCR15_Ecoli_NOTEX_replicate5
b0068	74989	internal	PCB109_PCR15_Ecoli_TEX_replicate4
b0068	75245	internal	PCB109_PCR15_Ecoli_TEX_replicate4
b0068	75608	primary	PCB109_PCR15_Ecoli_TEX_replicate4
b0068	74989	internal	PCB109_PCR15_Ecoli_TEX_replicate5
b0068	75245	internal	PCB109_PCR15_Ecoli_TEX_replicate5
b0068	75608	primary	PCB109_PCR15_Ecoli_TEX_replicate5
b0068	74989	internal	PCB109_PCR12_Ecoli_NOTEX_replicate4
b0068	75245	internal	PCB109_PCR12_Ecoli_NOTEX_replicate4
b0068	75608	primary	PCB109_PCR12_Ecoli_NOTEX_replicate4
b0068	74989	internal	PCB109_PCR12_Ecoli_TEX_replicate4
b0068	75245	internal	PCB109_PCR12_Ecoli_TEX_replicate4
b0068	75608	primary	PCB109_PCR12_Ecoli_TEX_replicate4
b0068	75608	primary	DCS109_Ecoli_NOTEX_replicate2
b0068	75608	primary	DCS109_Ecoli_NOTEX_replicate3
b0069	77592	primary	PCB109_PCR15_Ecoli_NOTEX_replicate5
b0069	77592	primary	PCB109_PCR15_Ecoli_TEX_replicate5
b0069	77577	primary	PCB109_PCR12_Ecoli_NOTEX_replicate4
b0069	77591	primary	PCB109_PCR12_Ecoli_TEX_replicate4
b0070	77367	secondary	PCB109_PCR15_Ecoli_NOTEX_replicate4
b0070	77797	internal	PCB109_PCR15_Ecoli_NOTEX_replicate4
b0070	77367	secondary	PCB109_PCR15_Ecoli_NOTEX_replicate5
b0070	77797	internal	PCB109_PCR15_Ecoli_NOTEX_replicate5
b0070	77367	secondary	PCB109_PCR15_Ecoli_TEX_replicate4
b0070	77797	internal	PCB109_PCR15_Ecoli_TEX_replicate4
b0070	77367	secondary	PCB109_PCR15_Ecoli_TEX_replicate5
b0070	77701	internal	PCB109_PCR15_Ecoli_TEX_replicate5
b0070	77797	internal	PCB109_PCR15_Ecoli_TEX_replicate5
b0070	77797	internal	PCB109_PCR12_Ecoli_NOTEX_replicate4
b0070	77367	secondary	PCB109_PCR12_Ecoli_TEX_replicate4
b0070	77701	internal	PCB109_PCR12_Ecoli_TEX_replicate4
b0070	77797	internal	PCB109_PCR12_Ecoli_TEX_replicate4
b0070	78337	internal	PCB109_PCR12_Ecoli_TEX_replicate4
b0070	77565	primary	DCS109_Ecoli_NOTEX_replicate3
b0071	79034	internal	PCB109_PCR15_Ecoli_NOTEX_replicate4
b0071	79034	internal	PCB109_PCR15_Ecoli_NOTEX_replicate5
b0071	79034	internal	PCB109_PCR15_Ecoli_TEX_replicate4
b0071	79034	internal	PCB109_PCR15_Ecoli_TEX_replicate5
b0071	79034	internal	PCB109_PCR12_Ecoli_NOTEX_replicate4
b0071	79034	internal	PCB109_PCR12_Ecoli_TEX_replicate4
b0073	81933	internal	PCB109_PCR15_Ecoli_NOTEX_replicate4
b0073	81933	internal	PCB109_PCR15_Ecoli_NOTEX_replicate5
b0073	81933	internal	PCB109_PCR15_Ecoli_TEX_replicate4
b0073	81933	internal	PCB109_PCR15_Ecoli_TEX_replicate5
b0073	81933	internal	PCB109_PCR12_Ecoli_NOTEX_replicate4
b0074	82569	internal	DCS109_Ecoli_NOTEX_replicate3
b0077	86399	internal	PCB109_PCR15_Ecoli_NOTEX_replicate4
b0077	86156	internal	PCB109_PCR15_Ecoli_NOTEX_replicate5
b0077	86349	internal	PCB109_PCR15_Ecoli_TEX_replicate4
b0080	87999	primary	PCB109_PCR15_Ecoli_NOTEX_replicate4
b0080	88533	internal	PCB109_PCR15_Ecoli_NOTEX_replicate4
b0080	87999	primary	PCB109_PCR15_Ecoli_NOTEX_replicate5
b0080	87999	primary	PCB109_PCR15_Ecoli_TEX_replicate4
b0080	87999	primary	PCB109_PCR15_Ecoli_TEX_replicate5
b0080	87969	secondary	PCB109_PCR12_Ecoli_NOTEX_replicate4
b0080	87999	primary	PCB109_PCR12_Ecoli_NOTEX_replicate4
b0080	87999	primary	PCB109_PCR12_Ecoli_TEX_replicate4
b0080	87999	primary	DCS109_Ecoli_NOTEX_replicate2
b0080	87969	primary	DCS109_Ecoli_NOTEX_replicate3
b0080	88642	internal	DCS109_Ecoli_NOTEX_replicate3
b0081	89373	primary	RNA001_Ecoli_TEX_replicate1
b0081	89602	secondary	RNA001_Ecoli_TEX_replicate1
b0081	89362	primary	PCB109_PCR15_Ecoli_NOTEX_replicate4
b0081	89597	secondary	PCB109_PCR15_Ecoli_NOTEX_replicate4
b0081	89362	primary	PCB109_PCR15_Ecoli_NOTEX_replicate5
b0081	89386	secondary	PCB109_PCR15_Ecoli_NOTEX_replicate5
b0081	89597	secondary	PCB109_PCR15_Ecoli_NOTEX_replicate5
b0081	89362	secondary	PCB109_PCR15_Ecoli_TEX_replicate4
b0081	89597	primary	PCB109_PCR15_Ecoli_TEX_replicate4
b0081	89362	primary	PCB109_PCR15_Ecoli_TEX_replicate5
b0081	89597	secondary	PCB109_PCR15_Ecoli_TEX_replicate5
b0081	89362	primary	PCB109_PCR12_Ecoli_NOTEX_replicate4
b0081	89590	secondary	PCB109_PCR12_Ecoli_NOTEX_replicate4
b0081	89621	secondary	PCB109_PCR12_Ecoli_NOTEX_replicate4
b0081	89791	internal	PCB109_PCR12_Ecoli_NOTEX_replicate4
b0081	89362	primary	PCB109_PCR12_Ecoli_TEX_replicate4
b0081	89592	secondary	PCB109_PCR12_Ecoli_TEX_replicate4
b0081	89620	secondary	PCB109_PCR12_Ecoli_TEX_replicate4
b0081	89362	primary	DCS109_Ecoli_NOTEX_replicate2
b0081	89405	secondary	DCS109_Ecoli_NOTEX_replicate2
b0081	89465	secondary	DCS109_Ecoli_NOTEX_replicate2
b0081	89718	internal	DCS109_Ecoli_NOTEX_replicate2
b0081	89776	internal	DCS109_Ecoli_NOTEX_replicate2
b0081	89953	internal	DCS109_Ecoli_NOTEX_replicate2
b0081	90071	internal	DCS109_Ecoli_NOTEX_replicate2
b0081	89362	primary	DCS109_Ecoli_NOTEX_replicate3
b0081	89465	secondary	DCS109_Ecoli_NOTEX_replicate3
b0081	89590	secondary	DCS109_Ecoli_NOTEX_replicate3
b0081	89718	internal	DCS109_Ecoli_NOTEX_replicate3
b0081	89742	internal	DCS109_Ecoli_NOTEX_replicate3
b0081	89778	internal	DCS109_Ecoli_NOTEX_replicate3
b0081	89871	internal	DCS109_Ecoli_NOTEX_replicate3
b0081	90008	internal	DCS109_Ecoli_NOTEX_replicate3
b0082	90175	internal	PCB109_PCR15_Ecoli_NOTEX_replicate4
b0082	90532	internal	PCB109_PCR15_Ecoli_NOTEX_replicate4
b0082	91011	internal	PCB109_PCR15_Ecoli_NOTEX_replicate4
b0082	90125	internal	PCB109_PCR15_Ecoli_NOTEX_replicate5
b0082	90532	internal	PCB109_PCR15_Ecoli_NOTEX_replicate5
b0082	90532	internal	PCB109_PCR15_Ecoli_TEX_replicate4
b0082	90822	internal	PCB109_PCR15_Ecoli_TEX_replicate4
b0082	91028	internal	PCB109_PCR15_Ecoli_TEX_replicate4
b0082	90532	internal	PCB109_PCR15_Ecoli_TEX_replicate5
b0082	91011	internal	PCB109_PCR15_Ecoli_TEX_replicate5
b0082	90125	internal	PCB109_PCR12_Ecoli_NOTEX_replicate4
b0082	90532	internal	PCB109_PCR12_Ecoli_NOTEX_replicate4
b0082	90558	internal	PCB109_PCR12_Ecoli_NOTEX_replicate4
b0082	90734	internal	PCB109_PCR12_Ecoli_NOTEX_replicate4
b0082	91028	internal	PCB109_PCR12_Ecoli_NOTEX_replicate4
b0082	90532	internal	PCB109_PCR12_Ecoli_TEX_replicate4
b0082	89953	secondary	DCS109_Ecoli_NOTEX_replicate2
b0082	90071	secondary	DCS109_Ecoli_NOTEX_replicate2
b0082	90352	internal	DCS109_Ecoli_NOTEX_replicate2
b0082	90547	internal	DCS109_Ecoli_NOTEX_replicate2
b0082	90718	internal	DCS109_Ecoli_NOTEX_replicate2
b0082	90823	internal	DCS109_Ecoli_NOTEX_replicate2
b0082	89871	primary	DCS109_Ecoli_NOTEX_replicate3
b0082	90008	secondary	DCS109_Ecoli_NOTEX_replicate3
b0082	90131	internal	DCS109_Ecoli_NOTEX_replicate3
b0082	90352	internal	DCS109_Ecoli_NOTEX_replicate3
b0082	90532	internal	DCS109_Ecoli_NOTEX_replicate3
b0082	90718	internal	DCS109_Ecoli_NOTEX_replicate3
b0083	91011	primary	PCB109_PCR15_Ecoli_NOTEX_replicate4
b0083	90822	secondary	PCB109_PCR15_Ecoli_TEX_replicate4
b0083	91028	primary	PCB109_PCR15_Ecoli_TEX_replicate4
b0083	91243	internal	PCB109_PCR15_Ecoli_TEX_replicate4
b0083	91011	primary	PCB109_PCR15_Ecoli_TEX_replicate5
b0083	90734	secondary	PCB109_PCR12_Ecoli_NOTEX_replicate4
b0083	91028	primary	PCB109_PCR12_Ecoli_NOTEX_replicate4
b0083	91243	internal	PCB109_PCR12_Ecoli_NOTEX_replicate4
b0083	90823	primary	DCS109_Ecoli_NOTEX_replicate2
b0084	91872	internal	PCB109_PCR15_Ecoli_NOTEX_replicate4
b0084	92485	internal	PCB109_PCR15_Ecoli_NOTEX_replicate4
b0084	92944	internal	PCB109_PCR15_Ecoli_NOTEX_replicate4
b0084	91872	internal	PCB109_PCR15_Ecoli_NOTEX_replicate5
b0084	91243	secondary	PCB109_PCR15_Ecoli_TEX_replicate4
b0084	91872	internal	PCB109_PCR15_Ecoli_TEX_replicate4
b0084	92485	internal	PCB109_PCR15_Ecoli_TEX_replicate4
b0084	92944	internal	PCB109_PCR15_Ecoli_TEX_replicate4
b0084	91872	internal	PCB109_PCR15_Ecoli_TEX_replicate5
b0084	91243	secondary	PCB109_PCR12_Ecoli_NOTEX_replicate4
b0084	91872	internal	PCB109_PCR12_Ecoli_NOTEX_replicate4
b0084	92263	internal	PCB109_PCR12_Ecoli_NOTEX_replicate4
b0084	92485	internal	PCB109_PCR12_Ecoli_NOTEX_replicate4
b0084	92944	internal	PCB109_PCR12_Ecoli_NOTEX_replicate4
b0084	91872	internal	PCB109_PCR12_Ecoli_TEX_replicate4
b0084	93158	internal	PCB109_PCR12_Ecoli_TEX_replicate4
b0084	91886	internal	DCS109_Ecoli_NOTEX_replicate2
b0084	92485	internal	DCS109_Ecoli_NOTEX_replicate2
b0084	92677	internal	DCS109_Ecoli_NOTEX_replicate2
b0084	91888	internal	DCS109_Ecoli_NOTEX_replicate3
b0084	92441	internal	DCS109_Ecoli_NOTEX_replicate3
b0084	92485	internal	DCS109_Ecoli_NOTEX_replicate3
b0084	92944	internal	DCS109_Ecoli_NOTEX_replicate3
b0085	92944	secondary	PCB109_PCR15_Ecoli_NOTEX_replicate4
b0085	93354	internal	PCB109_PCR15_Ecoli_NOTEX_replicate4
b0085	93608	internal	PCB109_PCR15_Ecoli_NOTEX_replicate4
b0085	94634	internal	PCB109_PCR15_Ecoli_NOTEX_replicate4
b0085	93608	internal	PCB109_PCR15_Ecoli_NOTEX_replicate5
b0085	94634	internal	PCB109_PCR15_Ecoli_NOTEX_replicate5
b0085	92944	secondary	PCB109_PCR15_Ecoli_TEX_replicate4
b0085	93354	internal	PCB109_PCR15_Ecoli_TEX_replicate4
b0085	93608	internal	PCB109_PCR15_Ecoli_TEX_replicate4
b0085	94634	internal	PCB109_PCR15_Ecoli_TEX_replicate4
b0085	93608	internal	PCB109_PCR15_Ecoli_TEX_replicate5
b0085	94634	internal	PCB109_PCR15_Ecoli_TEX_replicate5
b0085	92944	secondary	PCB109_PCR12_Ecoli_NOTEX_replicate4
b0085	93354	internal	PCB109_PCR12_Ecoli_NOTEX_replicate4
b0085	93608	internal	PCB109_PCR12_Ecoli_NOTEX_replicate4
b0085	94634	internal	PCB109_PCR12_Ecoli_NOTEX_replicate4
b0085	93158	secondary	PCB109_PCR12_Ecoli_TEX_replicate4
b0085	93454	internal	PCB109_PCR12_Ecoli_TEX_replicate4
b0085	94634	internal	PCB109_PCR12_Ecoli_TEX_replicate4
b0085	93767	internal	DCS109_Ecoli_NOTEX_replicate2
b0085	92944	primary	DCS109_Ecoli_NOTEX_replicate3
b0085	93347	internal	DCS109_Ecoli_NOTEX_replicate3
b0085	94644	internal	DCS109_Ecoli_NOTEX_replicate3
b0086	94634	primary	PCB109_PCR15_Ecoli_NOTEX_replicate4
b0086	95478	internal	PCB109_PCR15_Ecoli_NOTEX_replicate4
b0086	95691	internal	PCB109_PCR15_Ecoli_NOTEX_replicate4
b0086	94634	primary	PCB109_PCR15_Ecoli_NOTEX_replicate5
b0086	95478	internal	PCB109_PCR15_Ecoli_NOTEX_replicate5
b0086	95691	internal	PCB109_PCR15_Ecoli_NOTEX_replicate5
b0086	94634	primary	PCB109_PCR15_Ecoli_TEX_replicate4
b0086	95478	internal	PCB109_PCR15_Ecoli_TEX_replicate4
b0086	95691	internal	PCB109_PCR15_Ecoli_TEX_replicate4
b0086	94634	secondary	PCB109_PCR15_Ecoli_TEX_replicate5
b0086	95478	internal	PCB109_PCR15_Ecoli_TEX_replicate5
b0086	95691	internal	PCB109_PCR15_Ecoli_TEX_replicate5
b0086	94634	primary	PCB109_PCR12_Ecoli_NOTEX_replicate4
b0086	94683	internal	PCB109_PCR12_Ecoli_NOTEX_replicate4
b0086	95478	internal	PCB109_PCR12_Ecoli_NOTEX_replicate4
b0086	95691	internal	PCB109_PCR12_Ecoli_NOTEX_replicate4
b0086	94634	primary	PCB109_PCR12_Ecoli_TEX_replicate4
b0086	94824	internal	PCB109_PCR12_Ecoli_TEX_replicate4
b0086	94967	internal	PCB109_PCR12_Ecoli_TEX_replicate4
b0086	95141	internal	PCB109_PCR12_Ecoli_TEX_replicate4
b0086	95478	internal	PCB109_PCR12_Ecoli_TEX_replicate4
b0086	95691	internal	PCB109_PCR12_Ecoli_TEX_replicate4
b0086	95141	internal	DCS109_Ecoli_NOTEX_replicate2
b0086	94644	secondary	DCS109_Ecoli_NOTEX_replicate3
b0086	95706	internal	DCS109_Ecoli_NOTEX_replicate3
b0087	96514	internal	PCB109_PCR15_Ecoli_NOTEX_replicate4
b0087	96514	internal	PCB109_PCR15_Ecoli_NOTEX_replicate5
b0087	96514	internal	PCB109_PCR15_Ecoli_TEX_replicate4
b0087	96551	internal	PCB109_PCR15_Ecoli_TEX_replicate4
b0087	97044	internal	PCB109_PCR15_Ecoli_TEX_replicate4
b0087	96514	internal	PCB109_PCR15_Ecoli_TEX_replicate5
b0087	96514	internal	PCB109_PCR12_Ecoli_NOTEX_replicate4
b0087	96514	internal	PCB109_PCR12_Ecoli_TEX_replicate4
b0087	95706	primary	DCS109_Ecoli_NOTEX_replicate3
b0088	98113	internal	PCB109_PCR15_Ecoli_NOTEX_replicate4
b0088	98113	internal	PCB109_PCR15_Ecoli_NOTEX_replicate5
b0088	97044	secondary	PCB109_PCR15_Ecoli_TEX_replicate4
b0088	98113	internal	PCB109_PCR15_Ecoli_TEX_replicate4
b0088	98113	internal	PCB109_PCR15_Ecoli_TEX_replicate5
b0088	98113	internal	PCB109_PCR12_Ecoli_NOTEX_replicate4
b0088	98113	internal	PCB109_PCR12_Ecoli_TEX_replicate4
b0088	97570	internal	DCS109_Ecoli_NOTEX_replicate2
b0089	98113	primary	PCB109_PCR15_Ecoli_NOTEX_replicate4
b0089	98485	internal	PCB109_PCR15_Ecoli_NOTEX_replicate4
b0089	99369	internal	PCB109_PCR15_Ecoli_NOTEX_replicate4
b0089	99636	internal	PCB109_PCR15_Ecoli_NOTEX_replicate4
b0089	98113	secondary	PCB109_PCR15_Ecoli_NOTEX_replicate5
b0089	98485	internal	PCB109_PCR15_Ecoli_NOTEX_replicate5
b0089	99369	internal	PCB109_PCR15_Ecoli_NOTEX_replicate5
b0089	98113	primary	PCB109_PCR15_Ecoli_TEX_replicate4
b0089	98485	internal	PCB109_PCR15_Ecoli_TEX_replicate4
b0089	99369	internal	PCB109_PCR15_Ecoli_TEX_replicate4
b0089	99607	internal	PCB109_PCR15_Ecoli_TEX_replicate4
b0089	99636	internal	PCB109_PCR15_Ecoli_TEX_replicate4
b0089	98113	primary	PCB109_PCR15_Ecoli_TEX_replicate5
b0089	98485	internal	PCB109_PCR15_Ecoli_TEX_replicate5
b0089	99369	internal	PCB109_PCR15_Ecoli_TEX_replicate5
b0089	98113	secondary	PCB109_PCR12_Ecoli_NOTEX_replicate4
b0089	98485	internal	PCB109_PCR12_Ecoli_NOTEX_replicate4
b0089	99086	internal	PCB109_PCR12_Ecoli_NOTEX_replicate4
b0089	99369	internal	PCB109_PCR12_Ecoli_NOTEX_replicate4
b0089	99607	internal	PCB109_PCR12_Ecoli_NOTEX_replicate4
b0089	99636	internal	PCB109_PCR12_Ecoli_NOTEX_replicate4
b0089	98113	secondary	PCB109_PCR12_Ecoli_TEX_replicate4
b0089	98485	internal	PCB109_PCR12_Ecoli_TEX_replicate4
b0089	98741	internal	PCB109_PCR12_Ecoli_TEX_replicate4
b0089	99369	internal	PCB109_PCR12_Ecoli_TEX_replicate4
b0089	99396	internal	DCS109_Ecoli_NOTEX_replicate2
b0089	99516	internal	DCS109_Ecoli_NOTEX_replicate2
b0089	99538	internal	DCS109_Ecoli_NOTEX_replicate2
b0089	99369	internal	DCS109_Ecoli_NOTEX_replicate3
b0089	99516	internal	DCS109_Ecoli_NOTEX_replicate3
b0089	99607	internal	DCS109_Ecoli_NOTEX_replicate3
b0089	99636	internal	DCS109_Ecoli_NOTEX_replicate3
b0090	99369	secondary	PCB109_PCR15_Ecoli_NOTEX_replicate4
b0090	99636	secondary	PCB109_PCR15_Ecoli_NOTEX_replicate4
b0090	99757	internal	PCB109_PCR15_Ecoli_NOTEX_replicate4
b0090	99369	primary	PCB109_PCR15_Ecoli_NOTEX_replicate5
b0090	99757	internal	PCB109_PCR15_Ecoli_NOTEX_replicate5
b0090	99369	secondary	PCB109_PCR15_Ecoli_TEX_replicate4
b0090	99607	primary	PCB109_PCR15_Ecoli_TEX_replicate4
b0090	99636	secondary	PCB109_PCR15_Ecoli_TEX_replicate4
b0090	99922	internal	PCB109_PCR15_Ecoli_TEX_replicate4
b0090	99369	secondary	PCB109_PCR15_Ecoli_TEX_replicate5
b0090	99757	internal	PCB109_PCR15_Ecoli_TEX_replicate5
b0090	99369	secondary	PCB109_PCR12_Ecoli_NOTEX_replicate4
b0090	99607	secondary	PCB109_PCR12_Ecoli_NOTEX_replicate4
b0090	99636	secondary	PCB109_PCR12_Ecoli_NOTEX_replicate4
b0090	99757	internal	PCB109_PCR12_Ecoli_NOTEX_replicate4
b0090	100621	internal	PCB109_PCR12_Ecoli_NOTEX_replicate4
b0090	99369	primary	PCB109_PCR12_Ecoli_TEX_replicate4
b0090	99757	internal	PCB109_PCR12_Ecoli_TEX_replicate4
b0090	100117	internal	PCB109_PCR12_Ecoli_TEX_replicate4
b0090	100537	internal	PCB109_PCR12_Ecoli_TEX_replicate4
b0090	99396	secondary	DCS109_Ecoli_NOTEX_replicate2
b0090	99516	primary	DCS109_Ecoli_NOTEX_replicate2
b0090	99538	secondary	DCS109_Ecoli_NOTEX_replicate2
b0090	99369	secondary	DCS109_Ecoli_NOTEX_replicate3
b0090	99516	primary	DCS109_Ecoli_NOTEX_replicate3
b0090	99607	secondary	DCS109_Ecoli_NOTEX_replicate3
b0090	99636	secondary	DCS109_Ecoli_NOTEX_replicate3
b0091	101799	internal	PCB109_PCR15_Ecoli_NOTEX_replicate4
b0091	101437	internal	PCB109_PCR15_Ecoli_NOTEX_replicate5
b0091	101981	internal	PCB109_PCR15_Ecoli_NOTEX_replicate5
b0091	101981	internal	PCB109_PCR15_Ecoli_TEX_replicate5
b0091	100621	primary	PCB109_PCR12_Ecoli_NOTEX_replicate4
b0091	101799	internal	PCB109_PCR12_Ecoli_NOTEX_replicate4
b0091	102157	internal	PCB109_PCR12_Ecoli_NOTEX_replicate4
b0091	100537	primary	PCB109_PCR12_Ecoli_TEX_replicate4
b0091	101437	internal	PCB109_PCR12_Ecoli_TEX_replicate4
b0091	101586	internal	PCB109_PCR12_Ecoli_TEX_replicate4
b0091	101653	internal	PCB109_PCR12_Ecoli_TEX_replicate4
b0091	102093	internal	PCB109_PCR12_Ecoli_TEX_replicate4
b0091	101927	internal	DCS109_Ecoli_NOTEX_replicate3
b0092	102254	internal	PCB109_PCR15_Ecoli_NOTEX_replicate4
b0092	102294	internal	PCB109_PCR15_Ecoli_NOTEX_replicate4
b0092	102966	internal	PCB109_PCR15_Ecoli_NOTEX_replicate4
b0092	103133	internal	PCB109_PCR15_Ecoli_NOTEX_replicate4
b0092	101981	primary	PCB109_PCR15_Ecoli_NOTEX_replicate5
b0092	102254	internal	PCB109_PCR15_Ecoli_NOTEX_replicate5
b0092	102447	internal	PCB109_PCR15_Ecoli_NOTEX_replicate5
b0092	101981	primary	PCB109_PCR15_Ecoli_TEX_replicate5
b0092	102157	secondary	PCB109_PCR12_Ecoli_NOTEX_replicate4
b0092	102254	internal	PCB109_PCR12_Ecoli_NOTEX_replicate4
b0092	102447	internal	PCB109_PCR12_Ecoli_NOTEX_replicate4
b0092	102871	internal	PCB109_PCR12_Ecoli_NOTEX_replicate4
b0092	103133	internal	PCB109_PCR12_Ecoli_NOTEX_replicate4
b0092	102093	secondary	PCB109_PCR12_Ecoli_TEX_replicate4
b0092	102254	internal	PCB109_PCR12_Ecoli_TEX_replicate4
b0092	102785	internal	PCB109_PCR12_Ecoli_TEX_replicate4
b0092	103078	internal	PCB109_PCR12_Ecoli_TEX_replicate4
b0092	102254	internal	DCS109_Ecoli_NOTEX_replicate2
b0092	102625	internal	DCS109_Ecoli_NOTEX_replicate2
b0092	102842	internal	DCS109_Ecoli_NOTEX_replicate2
b0092	102406	internal	DCS109_Ecoli_NOTEX_replicate3
b0092	102625	internal	DCS109_Ecoli_NOTEX_replicate3
b0092	103102	internal	DCS109_Ecoli_NOTEX_replicate3
b0092	103133	internal	DCS109_Ecoli_NOTEX_replicate3
b0093	102966	secondary	PCB109_PCR15_Ecoli_NOTEX_replicate4
b0093	103133	secondary	PCB109_PCR15_Ecoli_NOTEX_replicate4
b0093	103279	internal	PCB109_PCR15_Ecoli_NOTEX_replicate4
b0093	103163	internal	PCB109_PCR15_Ecoli_NOTEX_replicate5
b0093	103279	internal	PCB109_PCR15_Ecoli_NOTEX_replicate5
b0093	103792	internal	PCB109_PCR15_Ecoli_NOTEX_replicate5
b0093	103163	internal	PCB109_PCR15_Ecoli_TEX_replicate4
b0093	103279	internal	PCB109_PCR15_Ecoli_TEX_replicate4
b0093	103279	internal	PCB109_PCR15_Ecoli_TEX_replicate5
b0093	102871	secondary	PCB109_PCR12_Ecoli_NOTEX_replicate4
b0093	103133	secondary	PCB109_PCR12_Ecoli_NOTEX_replicate4
b0093	103163	internal	PCB109_PCR12_Ecoli_NOTEX_replicate4
b0093	103279	internal	PCB109_PCR12_Ecoli_NOTEX_replicate4
b0093	103894	internal	PCB109_PCR12_Ecoli_NOTEX_replicate4
b0093	103078	secondary	PCB109_PCR12_Ecoli_TEX_replicate4
b0093	103163	internal	PCB109_PCR12_Ecoli_TEX_replicate4
b0093	103279	internal	PCB109_PCR12_Ecoli_TEX_replicate4
b0093	103703	internal	PCB109_PCR12_Ecoli_TEX_replicate4
b0093	103102	primary	DCS109_Ecoli_NOTEX_replicate3
b0093	103133	secondary	DCS109_Ecoli_NOTEX_replicate3
b0093	103319	internal	DCS109_Ecoli_NOTEX_replicate3
b0093	103858	internal	DCS109_Ecoli_NOTEX_replicate3
b0094	104704	internal	RNA001_Ecoli_TEX_replicate1
b0094	104275	internal	PCB109_PCR15_Ecoli_NOTEX_replicate4
b0094	104534	internal	PCB109_PCR15_Ecoli_NOTEX_replicate4
b0094	104643	internal	PCB109_PCR15_Ecoli_NOTEX_replicate4
b0094	104693	internal	PCB109_PCR15_Ecoli_NOTEX_replicate4
b0094	105115	internal	PCB109_PCR15_Ecoli_NOTEX_replicate4
b0094	103792	secondary	PCB109_PCR15_Ecoli_NOTEX_replicate5
b0094	104264	internal	PCB109_PCR15_Ecoli_NOTEX_replicate5
b0094	104636	internal	PCB109_PCR15_Ecoli_NOTEX_replicate5
b0094	104693	internal	PCB109_PCR15_Ecoli_NOTEX_replicate5
b0094	105047	internal	PCB109_PCR15_Ecoli_NOTEX_replicate5
b0094	105115	internal	PCB109_PCR15_Ecoli_NOTEX_replicate5
b0094	104693	internal	PCB109_PCR15_Ecoli_TEX_replicate4
b0094	104914	internal	PCB109_PCR15_Ecoli_TEX_replicate4
b0094	104636	internal	PCB109_PCR15_Ecoli_TEX_replicate5
b0094	104693	internal	PCB109_PCR15_Ecoli_TEX_replicate5
b0094	103894	secondary	PCB109_PCR12_Ecoli_NOTEX_replicate4
b0094	104188	internal	PCB109_PCR12_Ecoli_NOTEX_replicate4
b0094	104534	internal	PCB109_PCR12_Ecoli_NOTEX_replicate4
b0094	104693	internal	PCB109_PCR12_Ecoli_NOTEX_replicate4
b0094	105137	internal	PCB109_PCR12_Ecoli_NOTEX_replicate4
b0094	103703	secondary	PCB109_PCR12_Ecoli_TEX_replicate4
b0094	104264	internal	PCB109_PCR12_Ecoli_TEX_replicate4
b0094	104636	internal	PCB109_PCR12_Ecoli_TEX_replicate4
b0094	104693	internal	PCB109_PCR12_Ecoli_TEX_replicate4
b0094	104950	internal	PCB109_PCR12_Ecoli_TEX_replicate4
b0094	105047	internal	PCB109_PCR12_Ecoli_TEX_replicate4
b0094	104061	internal	DCS109_Ecoli_NOTEX_replicate2
b0094	104630	internal	DCS109_Ecoli_NOTEX_replicate2
b0094	104693	internal	DCS109_Ecoli_NOTEX_replicate2
b0094	104900	internal	DCS109_Ecoli_NOTEX_replicate2
b0094	104981	internal	DCS109_Ecoli_NOTEX_replicate2
b0094	105113	internal	DCS109_Ecoli_NOTEX_replicate2
b0094	105159	internal	DCS109_Ecoli_NOTEX_replicate2
b0094	103858	secondary	DCS109_Ecoli_NOTEX_replicate3
b0094	104101	internal	DCS109_Ecoli_NOTEX_replicate3
b0094	104693	internal	DCS109_Ecoli_NOTEX_replicate3
b0094	104981	internal	DCS109_Ecoli_NOTEX_replicate3
b0094	105113	internal	DCS109_Ecoli_NOTEX_replicate3
b0095	105115	secondary	PCB109_PCR15_Ecoli_NOTEX_replicate4
b0095	105284	secondary	PCB109_PCR15_Ecoli_NOTEX_replicate4
b0095	105601	internal	PCB109_PCR15_Ecoli_NOTEX_replicate4
b0095	105807	internal	PCB109_PCR15_Ecoli_NOTEX_replicate4
b0095	105964	internal	PCB109_PCR15_Ecoli_NOTEX_replicate4
b0095	106212	internal	PCB109_PCR15_Ecoli_NOTEX_replicate4
b0095	105047	secondary	PCB109_PCR15_Ecoli_NOTEX_replicate5
b0095	105115	secondary	PCB109_PCR15_Ecoli_NOTEX_replicate5
b0095	105601	internal	PCB109_PCR15_Ecoli_NOTEX_replicate5
b0095	105807	internal	PCB109_PCR15_Ecoli_NOTEX_replicate5
b0095	105964	internal	PCB109_PCR15_Ecoli_NOTEX_replicate5
b0095	105601	internal	PCB109_PCR15_Ecoli_TEX_replicate4
b0095	105807	internal	PCB109_PCR15_Ecoli_TEX_replicate4
b0095	105875	internal	PCB109_PCR15_Ecoli_TEX_replicate4
b0095	105601	internal	PCB109_PCR15_Ecoli_TEX_replicate5
b0095	105807	internal	PCB109_PCR15_Ecoli_TEX_replicate5
b0095	105964	internal	PCB109_PCR15_Ecoli_TEX_replicate5
b0095	105137	secondary	PCB109_PCR12_Ecoli_NOTEX_replicate4
b0095	105291	secondary	PCB109_PCR12_Ecoli_NOTEX_replicate4
b0095	105601	internal	PCB109_PCR12_Ecoli_NOTEX_replicate4
b0095	105807	internal	PCB109_PCR12_Ecoli_NOTEX_replicate4
b0095	105964	internal	PCB109_PCR12_Ecoli_NOTEX_replicate4
b0095	106212	internal	PCB109_PCR12_Ecoli_NOTEX_replicate4
b0095	105047	secondary	PCB109_PCR12_Ecoli_TEX_replicate4
b0095	105601	internal	PCB109_PCR12_Ecoli_TEX_replicate4
b0095	105807	internal	PCB109_PCR12_Ecoli_TEX_replicate4
b0095	105113	secondary	DCS109_Ecoli_NOTEX_replicate2
b0095	105159	secondary	DCS109_Ecoli_NOTEX_replicate2
b0095	105269	primary	DCS109_Ecoli_NOTEX_replicate2
b0095	106248	internal	DCS109_Ecoli_NOTEX_replicate2
b0095	105113	secondary	DCS109_Ecoli_NOTEX_replicate3
b0095	105269	primary	DCS109_Ecoli_NOTEX_replicate3
b0095	106399	internal	DCS109_Ecoli_NOTEX_replicate3
b0096	106516	primary	RNA001_Ecoli_TEX_replicate1
b0096	106542	secondary	RNA001_Ecoli_TEX_replicate1
b0096	107115	internal	RNA001_Ecoli_TEX_replicate1
b0096	106530	primary	PCB109_PCR15_Ecoli_NOTEX_replicate4
b0096	107111	internal	PCB109_PCR15_Ecoli_NOTEX_replicate4
b0096	107297	internal	PCB109_PCR15_Ecoli_NOTEX_replicate4
b0096	106505	primary	PCB109_PCR15_Ecoli_NOTEX_replicate5
b0096	107169	internal	PCB109_PCR15_Ecoli_NOTEX_replicate5
b0096	106530	primary	PCB109_PCR15_Ecoli_TEX_replicate4
b0096	107111	internal	PCB109_PCR15_Ecoli_TEX_replicate4
b0096	107297	internal	PCB109_PCR15_Ecoli_TEX_replicate4
b0096	106530	primary	PCB109_PCR15_Ecoli_TEX_replicate5
b0096	107114	internal	PCB109_PCR15_Ecoli_TEX_replicate5
b0096	106530	primary	PCB109_PCR12_Ecoli_NOTEX_replicate4
b0096	106754	internal	PCB109_PCR12_Ecoli_NOTEX_replicate4
b0096	106817	internal	PCB109_PCR12_Ecoli_NOTEX_replicate4
b0096	106940	internal	PCB109_PCR12_Ecoli_NOTEX_replicate4
b0096	106987	internal	PCB109_PCR12_Ecoli_NOTEX_replicate4
b0096	107297	internal	PCB109_PCR12_Ecoli_NOTEX_replicate4
b0096	106505	primary	PCB109_PCR12_Ecoli_TEX_replicate4
b0096	106652	internal	PCB109_PCR12_Ecoli_TEX_replicate4
b0096	107307	internal	PCB109_PCR12_Ecoli_TEX_replicate4
b0096	106530	primary	DCS109_Ecoli_NOTEX_replicate2
b0096	106614	internal	DCS109_Ecoli_NOTEX_replicate2
b0096	106657	internal	DCS109_Ecoli_NOTEX_replicate2
b0096	106716	internal	DCS109_Ecoli_NOTEX_replicate2
b0096	106761	internal	DCS109_Ecoli_NOTEX_replicate2
b0096	106818	internal	DCS109_Ecoli_NOTEX_replicate2
b0096	106938	internal	DCS109_Ecoli_NOTEX_replicate2
b0096	107093	internal	DCS109_Ecoli_NOTEX_replicate2
b0096	107231	internal	DCS109_Ecoli_NOTEX_replicate2
b0096	107297	internal	DCS109_Ecoli_NOTEX_replicate2
b0096	106399	secondary	DCS109_Ecoli_NOTEX_replicate3
b0096	106530	primary	DCS109_Ecoli_NOTEX_replicate3
b0096	106616	internal	DCS109_Ecoli_NOTEX_replicate3
b0096	106657	internal	DCS109_Ecoli_NOTEX_replicate3
b0096	106716	internal	DCS109_Ecoli_NOTEX_replicate3
b0096	106725	internal	DCS109_Ecoli_NOTEX_replicate3
b0096	106748	internal	DCS109_Ecoli_NOTEX_replicate3
b0096	106793	internal	DCS109_Ecoli_NOTEX_replicate3
b0096	106822	internal	DCS109_Ecoli_NOTEX_replicate3
b0096	106931	internal	DCS109_Ecoli_NOTEX_replicate3
b0096	107060	internal	DCS109_Ecoli_NOTEX_replicate3
b0096	107144	internal	DCS109_Ecoli_NOTEX_replicate3
b0096	107231	internal	DCS109_Ecoli_NOTEX_replicate3
b0096	107297	internal	DCS109_Ecoli_NOTEX_replicate3
b0096	106542	primary	RNA002_Ecoli_NOTEX_replicate2
b0097	107680	primary	RNA001_Ecoli_TEX_replicate1
b0097	107668	primary	PCB109_PCR15_Ecoli_NOTEX_replicate4
b0097	107894	internal	PCB109_PCR15_Ecoli_NOTEX_replicate4
b0097	107668	primary	PCB109_PCR15_Ecoli_NOTEX_replicate5
b0097	107894	internal	PCB109_PCR15_Ecoli_NOTEX_replicate5
b0097	107668	primary	PCB109_PCR15_Ecoli_TEX_replicate4
b0097	107894	internal	PCB109_PCR15_Ecoli_TEX_replicate4
b0097	107668	primary	PCB109_PCR15_Ecoli_TEX_replicate5
b0097	107696	secondary	PCB109_PCR15_Ecoli_TEX_replicate5
b0097	107668	primary	PCB109_PCR12_Ecoli_NOTEX_replicate4
b0097	107894	internal	PCB109_PCR12_Ecoli_NOTEX_replicate4
b0097	107976	internal	PCB109_PCR12_Ecoli_NOTEX_replicate4
b0097	107668	primary	PCB109_PCR12_Ecoli_TEX_replicate4
b0097	107894	internal	PCB109_PCR12_Ecoli_TEX_replicate4
b0097	107668	primary	DCS109_Ecoli_NOTEX_replicate2
b0097	107820	internal	DCS109_Ecoli_NOTEX_replicate2
b0097	108021	internal	DCS109_Ecoli_NOTEX_replicate2
b0097	108034	internal	DCS109_Ecoli_NOTEX_replicate2
b0097	107572	secondary	DCS109_Ecoli_NOTEX_replicate3
b0097	107668	primary	DCS109_Ecoli_NOTEX_replicate3
b0097	107848	internal	DCS109_Ecoli_NOTEX_replicate3
b0097	107922	internal	DCS109_Ecoli_NOTEX_replicate3
b0097	107976	internal	DCS109_Ecoli_NOTEX_replicate3
b0097	108015	internal	DCS109_Ecoli_NOTEX_replicate3
b0098	109114	internal	PCB109_PCR15_Ecoli_NOTEX_replicate4
b0098	109805	internal	PCB109_PCR15_Ecoli_NOTEX_replicate4
b0098	110382	internal	PCB109_PCR15_Ecoli_NOTEX_replicate4
b0098	110538	internal	PCB109_PCR15_Ecoli_NOTEX_replicate4
b0098	108454	internal	PCB109_PCR15_Ecoli_NOTEX_replicate5
b0098	109145	internal	PCB109_PCR15_Ecoli_NOTEX_replicate5
b0098	109805	internal	PCB109_PCR15_Ecoli_NOTEX_replicate5
b0098	108454	internal	PCB109_PCR15_Ecoli_TEX_replicate4
b0098	109114	internal	PCB109_PCR15_Ecoli_TEX_replicate4
b0098	109633	internal	PCB109_PCR15_Ecoli_TEX_replicate4
b0098	109805	internal	PCB109_PCR15_Ecoli_TEX_replicate4
b0098	110436	internal	PCB109_PCR15_Ecoli_TEX_replicate4
b0098	110538	internal	PCB109_PCR15_Ecoli_TEX_replicate4
b0098	108454	internal	PCB109_PCR15_Ecoli_TEX_replicate5
b0098	109145	internal	PCB109_PCR15_Ecoli_TEX_replicate5
b0098	109633	internal	PCB109_PCR15_Ecoli_TEX_replicate5
b0098	110382	internal	PCB109_PCR15_Ecoli_TEX_replicate5
b0098	110538	internal	PCB109_PCR15_Ecoli_TEX_replicate5
b0098	108290	internal	PCB109_PCR12_Ecoli_NOTEX_replicate4
b0098	108454	internal	PCB109_PCR12_Ecoli_NOTEX_replicate4
b0098	109037	internal	PCB109_PCR12_Ecoli_NOTEX_replicate4
b0098	109084	internal	PCB109_PCR12_Ecoli_NOTEX_replicate4
b0098	109121	internal	PCB109_PCR12_Ecoli_NOTEX_replicate4
b0098	109633	internal	PCB109_PCR12_Ecoli_NOTEX_replicate4
b0098	110382	internal	PCB109_PCR12_Ecoli_NOTEX_replicate4
b0098	110538	internal	PCB109_PCR12_Ecoli_NOTEX_replicate4
b0098	108454	internal	PCB109_PCR12_Ecoli_TEX_replicate4
b0098	109633	internal	PCB109_PCR12_Ecoli_TEX_replicate4
b0098	109805	internal	PCB109_PCR12_Ecoli_TEX_replicate4
b0098	108021	secondary	DCS109_Ecoli_NOTEX_replicate2
b0098	108034	secondary	DCS109_Ecoli_NOTEX_replicate2
b0098	108391	internal	DCS109_Ecoli_NOTEX_replicate2
b0098	109767	internal	DCS109_Ecoli_NOTEX_replicate2
b0098	110028	internal	DCS109_Ecoli_NOTEX_replicate2
b0098	110538	internal	DCS109_Ecoli_NOTEX_replicate2
b0098	110708	internal	DCS109_Ecoli_NOTEX_replicate2
b0098	108015	primary	DCS109_Ecoli_NOTEX_replicate3
b0098	108454	internal	DCS109_Ecoli_NOTEX_replicate3
b0099	111309	internal	PCB109_PCR15_Ecoli_NOTEX_replicate4
b0099	111309	internal	PCB109_PCR15_Ecoli_NOTEX_replicate5
b0099	111309	internal	PCB109_PCR15_Ecoli_TEX_replicate5
b0099	111309	internal	PCB109_PCR12_Ecoli_NOTEX_replicate4
b0099	111331	internal	DCS109_Ecoli_NOTEX_replicate2
b0099	111352	internal	DCS109_Ecoli_NOTEX_replicate2
b0099	111380	internal	DCS109_Ecoli_NOTEX_replicate2
b0099	111429	internal	DCS109_Ecoli_NOTEX_replicate2
b0101	111905	primary	DCS109_Ecoli_NOTEX_replicate2
b0101	111740	internal	DCS109_Ecoli_NOTEX_replicate3
b0102	112676	primary	RNA001_Ecoli_TEX_replicate1
b0102	112688	primary	PCB109_PCR15_Ecoli_NOTEX_replicate4
b0102	112688	primary	PCB109_PCR15_Ecoli_NOTEX_replicate5
b0102	112688	primary	PCB109_PCR15_Ecoli_TEX_replicate4
b0102	112688	primary	PCB109_PCR15_Ecoli_TEX_replicate5
b0102	112688	primary	PCB109_PCR12_Ecoli_NOTEX_replicate4
b0102	112881	secondary	PCB109_PCR12_Ecoli_NOTEX_replicate4
b0102	112688	primary	PCB109_PCR12_Ecoli_TEX_replicate4
b0102	112881	secondary	PCB109_PCR12_Ecoli_TEX_replicate4
b0102	111905	internal	DCS109_Ecoli_NOTEX_replicate2
b0102	112688	secondary	DCS109_Ecoli_NOTEX_replicate2
b0102	112881	primary	DCS109_Ecoli_NOTEX_replicate2
b0102	112688	primary	DCS109_Ecoli_NOTEX_replicate3
b0102	112727	secondary	DCS109_Ecoli_NOTEX_replicate3
b0103	112676	internal	RNA001_Ecoli_TEX_replicate1
b0103	112688	internal	PCB109_PCR15_Ecoli_NOTEX_replicate4
b0103	112688	internal	PCB109_PCR15_Ecoli_NOTEX_replicate5
b0103	112688	internal	PCB109_PCR15_Ecoli_TEX_replicate4
b0103	112688	internal	PCB109_PCR15_Ecoli_TEX_replicate5
b0103	112688	internal	PCB109_PCR12_Ecoli_NOTEX_replicate4
b0103	112881	internal	PCB109_PCR12_Ecoli_NOTEX_replicate4
b0103	113319	secondary	PCB109_PCR12_Ecoli_NOTEX_replicate4
b0103	112688	internal	PCB109_PCR12_Ecoli_TEX_replicate4
b0103	112881	internal	PCB109_PCR12_Ecoli_TEX_replicate4
b0103	112688	internal	DCS109_Ecoli_NOTEX_replicate2
b0103	112881	internal	DCS109_Ecoli_NOTEX_replicate2
b0103	113320	primary	DCS109_Ecoli_NOTEX_replicate2
b0103	112688	internal	DCS109_Ecoli_NOTEX_replicate3
b0103	112727	internal	DCS109_Ecoli_NOTEX_replicate3
b0103	113166	internal	DCS109_Ecoli_NOTEX_replicate3
b0103	113320	secondary	DCS109_Ecoli_NOTEX_replicate3
b0104	113408	primary	RNA001_Ecoli_TEX_replicate1
b0104	113397	primary	PCB109_PCR15_Ecoli_NOTEX_replicate4
b0104	113941	internal	PCB109_PCR15_Ecoli_NOTEX_replicate4
b0104	113397	primary	PCB109_PCR15_Ecoli_NOTEX_replicate5
b0104	113941	internal	PCB109_PCR15_Ecoli_NOTEX_replicate5
b0104	113394	primary	PCB109_PCR15_Ecoli_TEX_replicate4
b0104	113941	internal	PCB109_PCR15_Ecoli_TEX_replicate4
b0104	113397	primary	PCB109_PCR15_Ecoli_TEX_replicate5
b0104	113941	internal	PCB109_PCR15_Ecoli_TEX_replicate5
b0104	113397	primary	PCB109_PCR12_Ecoli_NOTEX_replicate4
b0104	113443	secondary	PCB109_PCR12_Ecoli_NOTEX_replicate4
b0104	113788	internal	PCB109_PCR12_Ecoli_NOTEX_replicate4
b0104	113941	internal	PCB109_PCR12_Ecoli_NOTEX_replicate4
b0104	113397	primary	PCB109_PCR12_Ecoli_TEX_replicate4
b0104	113941	internal	PCB109_PCR12_Ecoli_TEX_replicate4
b0104	113397	primary	DCS109_Ecoli_NOTEX_replicate2
b0104	113397	primary	DCS109_Ecoli_NOTEX_replicate3
b0104	113426	secondary	DCS109_Ecoli_NOTEX_replicate3
b0106	114526	internal	PCB109_PCR15_Ecoli_NOTEX_replicate4
b0106	114990	internal	PCB109_PCR15_Ecoli_NOTEX_replicate4
b0106	114526	internal	PCB109_PCR15_Ecoli_NOTEX_replicate5
b0106	114577	internal	PCB109_PCR15_Ecoli_NOTEX_replicate5
b0106	114526	internal	PCB109_PCR15_Ecoli_TEX_replicate4
b0106	114990	internal	PCB109_PCR15_Ecoli_TEX_replicate4
b0106	114526	internal	PCB109_PCR15_Ecoli_TEX_replicate5
b0106	114580	internal	PCB109_PCR15_Ecoli_TEX_replicate5
b0106	114526	internal	PCB109_PCR12_Ecoli_NOTEX_replicate4
b0106	114990	internal	PCB109_PCR12_Ecoli_NOTEX_replicate4
b0106	114526	internal	PCB109_PCR12_Ecoli_TEX_replicate4
b0106	114526	internal	DCS109_Ecoli_NOTEX_replicate2
b0106	114526	internal	DCS109_Ecoli_NOTEX_replicate3
b0107	117049	internal	PCB109_PCR12_Ecoli_NOTEX_replicate4
b0109	118679	primary	PCB109_PCR15_Ecoli_NOTEX_replicate4
b0109	118679	primary	PCB109_PCR15_Ecoli_TEX_replicate4
b0109	118679	primary	PCB109_PCR12_Ecoli_NOTEX_replicate4
b0109	118522	internal	DCS109_Ecoli_NOTEX_replicate2
b0109	118679	primary	DCS109_Ecoli_NOTEX_replicate2
b0109	118541	internal	DCS109_Ecoli_NOTEX_replicate3
b0109	118870	primary	DCS109_Ecoli_NOTEX_replicate3
b0110	118701	primary	PCB109_PCR15_Ecoli_NOTEX_replicate4
b0110	118701	primary	PCB109_PCR15_Ecoli_NOTEX_replicate5
b0110	118701	primary	PCB109_PCR15_Ecoli_TEX_replicate4
b0110	118701	primary	PCB109_PCR15_Ecoli_TEX_replicate5
b0110	118701	primary	PCB109_PCR12_Ecoli_NOTEX_replicate4
b0110	118701	primary	PCB109_PCR12_Ecoli_TEX_replicate4
b0110	118701	primary	DCS109_Ecoli_NOTEX_replicate2
b0110	118701	primary	DCS109_Ecoli_NOTEX_replicate3
b0112	121676	primary	PCB109_PCR15_Ecoli_NOTEX_replicate4
b0112	121676	primary	PCB109_PCR15_Ecoli_NOTEX_replicate5
b0112	121000	internal	PCB109_PCR15_Ecoli_TEX_replicate4
b0112	121000	internal	PCB109_PCR15_Ecoli_TEX_replicate5
b0112	121022	internal	PCB109_PCR15_Ecoli_TEX_replicate5
b0112	121676	primary	PCB109_PCR15_Ecoli_TEX_replicate5
b0112	121676	primary	PCB109_PCR12_Ecoli_NOTEX_replicate4
b0112	121676	primary	PCB109_PCR12_Ecoli_TEX_replicate4
b0112	121676	primary	DCS109_Ecoli_NOTEX_replicate2
b0112	121676	primary	DCS109_Ecoli_NOTEX_replicate3
b0113	122047	primary	RNA001_Ecoli_TEX_replicate1
b0113	122642	internal	PCB109_PCR12_Ecoli_NOTEX_replicate4
b0113	122852	internal	PCB109_PCR12_Ecoli_NOTEX_replicate4
b0114	122967	secondary	PCB109_PCR15_Ecoli_NOTEX_replicate4
b0114	123543	internal	PCB109_PCR15_Ecoli_NOTEX_replicate4
b0114	123652	internal	PCB109_PCR15_Ecoli_NOTEX_replicate4
b0114	123876	internal	PCB109_PCR15_Ecoli_NOTEX_replicate4
b0114	124850	internal	PCB109_PCR15_Ecoli_NOTEX_replicate4
b0114	125131	internal	PCB109_PCR15_Ecoli_NOTEX_replicate4
b0114	125575	internal	PCB109_PCR15_Ecoli_NOTEX_replicate4
b0114	123876	internal	PCB109_PCR15_Ecoli_NOTEX_replicate5
b0114	124721	internal	PCB109_PCR15_Ecoli_NOTEX_replicate5
b0114	124850	internal	PCB109_PCR15_Ecoli_NOTEX_replicate5
b0114	125131	internal	PCB109_PCR15_Ecoli_NOTEX_replicate5
b0114	125575	internal	PCB109_PCR15_Ecoli_NOTEX_replicate5
b0114	122967	secondary	PCB109_PCR15_Ecoli_TEX_replicate4
b0114	123876	internal	PCB109_PCR15_Ecoli_TEX_replicate4
b0114	124135	internal	PCB109_PCR15_Ecoli_TEX_replicate4
b0114	124850	internal	PCB109_PCR15_Ecoli_TEX_replicate4
b0114	125131	internal	PCB109_PCR15_Ecoli_TEX_replicate4
b0114	125575	internal	PCB109_PCR15_Ecoli_TEX_replicate4
b0114	124721	internal	PCB109_PCR15_Ecoli_TEX_replicate5
b0114	124850	internal	PCB109_PCR15_Ecoli_TEX_replicate5
b0114	125575	internal	PCB109_PCR15_Ecoli_TEX_replicate5
b0114	122852	secondary	PCB109_PCR12_Ecoli_NOTEX_replicate4
b0114	122967	primary	PCB109_PCR12_Ecoli_NOTEX_replicate4
b0114	123095	internal	PCB109_PCR12_Ecoli_NOTEX_replicate4
b0114	123388	internal	PCB109_PCR12_Ecoli_NOTEX_replicate4
b0114	123543	internal	PCB109_PCR12_Ecoli_NOTEX_replicate4
b0114	123871	internal	PCB109_PCR12_Ecoli_NOTEX_replicate4
b0114	124102	internal	PCB109_PCR12_Ecoli_NOTEX_replicate4
b0114	124850	internal	PCB109_PCR12_Ecoli_NOTEX_replicate4
b0114	125131	internal	PCB109_PCR12_Ecoli_NOTEX_replicate4
b0114	125429	internal	PCB109_PCR12_Ecoli_NOTEX_replicate4
b0114	125575	internal	PCB109_PCR12_Ecoli_NOTEX_replicate4
b0114	125617	internal	PCB109_PCR12_Ecoli_NOTEX_replicate4
b0114	122973	secondary	PCB109_PCR12_Ecoli_TEX_replicate4
b0114	123111	internal	PCB109_PCR12_Ecoli_TEX_replicate4
b0114	123601	internal	PCB109_PCR12_Ecoli_TEX_replicate4
b0114	123871	internal	PCB109_PCR12_Ecoli_TEX_replicate4
b0114	124207	internal	PCB109_PCR12_Ecoli_TEX_replicate4
b0114	124441	internal	PCB109_PCR12_Ecoli_TEX_replicate4
b0114	124721	internal	PCB109_PCR12_Ecoli_TEX_replicate4
b0114	124850	internal	PCB109_PCR12_Ecoli_TEX_replicate4
b0114	124946	internal	PCB109_PCR12_Ecoli_TEX_replicate4
b0114	125131	internal	PCB109_PCR12_Ecoli_TEX_replicate4
b0114	125575	internal	PCB109_PCR12_Ecoli_TEX_replicate4
b0114	122967	secondary	DCS109_Ecoli_NOTEX_replicate2
b0114	123018	internal	DCS109_Ecoli_NOTEX_replicate2
b0114	123075	internal	DCS109_Ecoli_NOTEX_replicate2
b0114	123241	internal	DCS109_Ecoli_NOTEX_replicate2
b0114	124781	internal	DCS109_Ecoli_NOTEX_replicate2
b0114	122967	primary	DCS109_Ecoli_NOTEX_replicate3
b0114	123018	internal	DCS109_Ecoli_NOTEX_replicate3
b0114	123241	internal	DCS109_Ecoli_NOTEX_replicate3
b0114	123543	internal	DCS109_Ecoli_NOTEX_replicate3
b0114	124150	internal	DCS109_Ecoli_NOTEX_replicate3
b0114	124396	internal	DCS109_Ecoli_NOTEX_replicate3
b0114	124781	internal	DCS109_Ecoli_NOTEX_replicate3
b0114	124895	internal	DCS109_Ecoli_NOTEX_replicate3
b0115	125575	secondary	PCB109_PCR15_Ecoli_NOTEX_replicate4
b0115	125707	internal	PCB109_PCR15_Ecoli_NOTEX_replicate4
b0115	125766	internal	PCB109_PCR15_Ecoli_NOTEX_replicate4
b0115	126152	internal	PCB109_PCR15_Ecoli_NOTEX_replicate4
b0115	126532	internal	PCB109_PCR15_Ecoli_NOTEX_replicate4
b0115	127322	internal	PCB109_PCR15_Ecoli_NOTEX_replicate4
b0115	125575	primary	PCB109_PCR15_Ecoli_NOTEX_replicate5
b0115	126738	internal	PCB109_PCR15_Ecoli_NOTEX_replicate5
b0115	126832	internal	PCB109_PCR15_Ecoli_NOTEX_replicate5
b0115	125575	secondary	PCB109_PCR15_Ecoli_TEX_replicate4
b0115	125697	internal	PCB109_PCR15_Ecoli_TEX_replicate4
b0115	126152	internal	PCB109_PCR15_Ecoli_TEX_replicate4
b0115	126532	internal	PCB109_PCR15_Ecoli_TEX_replicate4
b0115	126725	internal	PCB109_PCR15_Ecoli_TEX_replicate4
b0115	126822	internal	PCB109_PCR15_Ecoli_TEX_replicate4
b0115	125575	primary	PCB109_PCR15_Ecoli_TEX_replicate5
b0115	125429	secondary	PCB109_PCR12_Ecoli_NOTEX_replicate4
b0115	125575	primary	PCB109_PCR12_Ecoli_NOTEX_replicate4
b0115	125617	secondary	PCB109_PCR12_Ecoli_NOTEX_replicate4
b0115	125707	internal	PCB109_PCR12_Ecoli_NOTEX_replicate4
b0115	125766	internal	PCB109_PCR12_Ecoli_NOTEX_replicate4
b0115	125860	internal	PCB109_PCR12_Ecoli_NOTEX_replicate4
b0115	126066	internal	PCB109_PCR12_Ecoli_NOTEX_replicate4
b0115	126319	internal	PCB109_PCR12_Ecoli_NOTEX_replicate4
b0115	126532	internal	PCB109_PCR12_Ecoli_NOTEX_replicate4
b0115	127002	internal	PCB109_PCR12_Ecoli_NOTEX_replicate4
b0115	125575	primary	PCB109_PCR12_Ecoli_TEX_replicate4
b0115	125790	internal	PCB109_PCR12_Ecoli_TEX_replicate4
b0115	125929	internal	PCB109_PCR12_Ecoli_TEX_replicate4
b0115	125997	internal	PCB109_PCR12_Ecoli_TEX_replicate4
b0115	126144	internal	PCB109_PCR12_Ecoli_TEX_replicate4
b0115	126235	internal	PCB109_PCR12_Ecoli_TEX_replicate4
b0115	126591	internal	PCB109_PCR12_Ecoli_TEX_replicate4
b0115	126653	internal	PCB109_PCR12_Ecoli_TEX_replicate4
b0115	126738	internal	PCB109_PCR12_Ecoli_TEX_replicate4
b0115	127147	internal	PCB109_PCR12_Ecoli_TEX_replicate4
b0115	127362	internal	PCB109_PCR12_Ecoli_TEX_replicate4
b0115	125998	internal	DCS109_Ecoli_NOTEX_replicate2
b0115	126410	internal	DCS109_Ecoli_NOTEX_replicate2
b0115	126585	internal	DCS109_Ecoli_NOTEX_replicate2
b0115	126651	internal	DCS109_Ecoli_NOTEX_replicate2
b0115	126873	internal	DCS109_Ecoli_NOTEX_replicate2
b0115	125707	internal	DCS109_Ecoli_NOTEX_replicate3
b0115	125929	internal	DCS109_Ecoli_NOTEX_replicate3
b0115	125998	internal	DCS109_Ecoli_NOTEX_replicate3
b0115	126099	internal	DCS109_Ecoli_NOTEX_replicate3
b0115	126152	internal	DCS109_Ecoli_NOTEX_replicate3
b0115	126197	internal	DCS109_Ecoli_NOTEX_replicate3
b0115	126389	internal	DCS109_Ecoli_NOTEX_replicate3
b0115	126525	internal	DCS109_Ecoli_NOTEX_replicate3
b0115	126601	internal	DCS109_Ecoli_NOTEX_replicate3
b0115	126709	internal	DCS109_Ecoli_NOTEX_replicate3
b0115	126873	internal	DCS109_Ecoli_NOTEX_replicate3
b0115	126990	internal	DCS109_Ecoli_NOTEX_replicate3
b0116	127614	secondary	PCB109_PCR15_Ecoli_NOTEX_replicate4
b0116	127717	secondary	PCB109_PCR15_Ecoli_NOTEX_replicate4
b0116	127999	internal	PCB109_PCR15_Ecoli_NOTEX_replicate4
b0116	128598	internal	PCB109_PCR15_Ecoli_NOTEX_replicate4
b0116	129173	internal	PCB109_PCR15_Ecoli_NOTEX_replicate4
b0116	127837	secondary	PCB109_PCR15_Ecoli_NOTEX_replicate5
b0116	128454	internal	PCB109_PCR15_Ecoli_NOTEX_replicate5
b0116	129173	internal	PCB109_PCR15_Ecoli_NOTEX_replicate5
b0116	127717	secondary	PCB109_PCR15_Ecoli_TEX_replicate4
b0116	128338	internal	PCB109_PCR15_Ecoli_TEX_replicate4
b0116	128499	internal	PCB109_PCR15_Ecoli_TEX_replicate4
b0116	129173	internal	PCB109_PCR15_Ecoli_TEX_replicate4
b0116	127614	secondary	PCB109_PCR15_Ecoli_TEX_replicate5
b0116	127717	secondary	PCB109_PCR15_Ecoli_TEX_replicate5
b0116	127999	internal	PCB109_PCR15_Ecoli_TEX_replicate5
b0116	128454	internal	PCB109_PCR15_Ecoli_TEX_replicate5
b0116	128499	internal	PCB109_PCR15_Ecoli_TEX_replicate5
b0116	129173	internal	PCB109_PCR15_Ecoli_TEX_replicate5
b0116	127614	secondary	PCB109_PCR12_Ecoli_NOTEX_replicate4
b0116	127717	secondary	PCB109_PCR12_Ecoli_NOTEX_replicate4
b0116	127999	internal	PCB109_PCR12_Ecoli_NOTEX_replicate4
b0116	128039	internal	PCB109_PCR12_Ecoli_NOTEX_replicate4
b0116	128166	internal	PCB109_PCR12_Ecoli_NOTEX_replicate4
b0116	128190	internal	PCB109_PCR12_Ecoli_NOTEX_replicate4
b0116	128273	internal	PCB109_PCR12_Ecoli_NOTEX_replicate4
b0116	128349	internal	PCB109_PCR12_Ecoli_NOTEX_replicate4
b0116	128499	internal	PCB109_PCR12_Ecoli_NOTEX_replicate4
b0116	128598	internal	PCB109_PCR12_Ecoli_NOTEX_replicate4
b0116	129173	internal	PCB109_PCR12_Ecoli_NOTEX_replicate4
b0116	127614	secondary	PCB109_PCR12_Ecoli_TEX_replicate4
b0116	127717	secondary	PCB109_PCR12_Ecoli_TEX_replicate4
b0116	128454	internal	PCB109_PCR12_Ecoli_TEX_replicate4
b0116	128499	internal	PCB109_PCR12_Ecoli_TEX_replicate4
b0116	128551	internal	PCB109_PCR12_Ecoli_TEX_replicate4
b0116	128609	internal	PCB109_PCR12_Ecoli_TEX_replicate4
b0116	129173	internal	PCB109_PCR12_Ecoli_TEX_replicate4
b0116	127614	secondary	DCS109_Ecoli_NOTEX_replicate2
b0116	127682	primary	DCS109_Ecoli_NOTEX_replicate2
b0116	127717	secondary	DCS109_Ecoli_NOTEX_replicate2
b0116	127841	secondary	DCS109_Ecoli_NOTEX_replicate2
b0116	128349	internal	DCS109_Ecoli_NOTEX_replicate2
b0116	128499	internal	DCS109_Ecoli_NOTEX_replicate2
b0116	129104	internal	DCS109_Ecoli_NOTEX_replicate2
b0116	129173	internal	DCS109_Ecoli_NOTEX_replicate2
b0116	127614	secondary	DCS109_Ecoli_NOTEX_replicate3
b0116	127682	primary	DCS109_Ecoli_NOTEX_replicate3
b0116	127717	secondary	DCS109_Ecoli_NOTEX_replicate3
b0116	127841	secondary	DCS109_Ecoli_NOTEX_replicate3
b0116	127875	secondary	DCS109_Ecoli_NOTEX_replicate3
b0116	128146	internal	DCS109_Ecoli_NOTEX_replicate3
b0116	128349	internal	DCS109_Ecoli_NOTEX_replicate3
b0116	128499	internal	DCS109_Ecoli_NOTEX_replicate3
b0116	128599	internal	DCS109_Ecoli_NOTEX_replicate3
b0116	128871	internal	DCS109_Ecoli_NOTEX_replicate3
b0116	129104	internal	DCS109_Ecoli_NOTEX_replicate3
b0116	129145	internal	DCS109_Ecoli_NOTEX_replicate3
b0116	129173	internal	DCS109_Ecoli_NOTEX_replicate3
b0117	129528	internal	DCS109_Ecoli_NOTEX_replicate3
b0118	131530	primary	RNA001_Ecoli_TEX_replicate1
b0118	131520	primary	PCB109_PCR15_Ecoli_NOTEX_replicate4
b0118	131520	primary	PCB109_PCR15_Ecoli_NOTEX_replicate5
b0118	131520	primary	PCB109_PCR15_Ecoli_TEX_replicate4
b0118	131520	primary	PCB109_PCR15_Ecoli_TEX_replicate5
b0118	131520	primary	PCB109_PCR12_Ecoli_NOTEX_replicate4
b0118	131520	primary	PCB109_PCR12_Ecoli_TEX_replicate4
b0118	131520	primary	DCS109_Ecoli_NOTEX_replicate3
b0119	134363	primary	PCB109_PCR15_Ecoli_NOTEX_replicate4
b0119	134363	primary	PCB109_PCR15_Ecoli_NOTEX_replicate5
b0119	134363	primary	PCB109_PCR15_Ecoli_TEX_replicate4
b0119	134363	primary	PCB109_PCR15_Ecoli_TEX_replicate5
b0119	134363	primary	PCB109_PCR12_Ecoli_NOTEX_replicate4
b0119	134363	primary	PCB109_PCR12_Ecoli_TEX_replicate4
b0119	134363	primary	DCS109_Ecoli_NOTEX_replicate2
b0119	134363	primary	DCS109_Ecoli_NOTEX_replicate3
b0120	134873	internal	PCB109_PCR12_Ecoli_NOTEX_replicate4
b0120	135183	internal	PCB109_PCR12_Ecoli_NOTEX_replicate4
b0120	134877	internal	PCB109_PCR12_Ecoli_TEX_replicate4
b0120	135427	internal	DCS109_Ecoli_NOTEX_replicate2
b0121	136493	primary	RNA001_Ecoli_TEX_replicate1
b0121	136504	primary	PCB109_PCR15_Ecoli_NOTEX_replicate4
b0121	136504	primary	PCB109_PCR15_Ecoli_NOTEX_replicate5
b0121	136761	primary	PCB109_PCR15_Ecoli_TEX_replicate4
b0121	136504	primary	PCB109_PCR15_Ecoli_TEX_replicate5
b0121	136504	primary	PCB109_PCR12_Ecoli_NOTEX_replicate4
b0121	136504	primary	PCB109_PCR12_Ecoli_TEX_replicate4
b0121	136550	secondary	PCB109_PCR12_Ecoli_TEX_replicate4
b0121	136745	primary	DCS109_Ecoli_NOTEX_replicate2
b0121	136454	internal	DCS109_Ecoli_NOTEX_replicate3
b0121	136504	primary	DCS109_Ecoli_NOTEX_replicate3
b0122	136761	internal	PCB109_PCR15_Ecoli_TEX_replicate4
b0122	136745	internal	DCS109_Ecoli_NOTEX_replicate2
b0122	136914	internal	DCS109_Ecoli_NOTEX_replicate2
b0122	136799	internal	DCS109_Ecoli_NOTEX_replicate3
b0122	136914	internal	DCS109_Ecoli_NOTEX_replicate3
b0123	138155	internal	PCB109_PCR15_Ecoli_NOTEX_replicate4
b0123	138155	internal	PCB109_PCR15_Ecoli_NOTEX_replicate5
b0123	138155	internal	PCB109_PCR15_Ecoli_TEX_replicate4
b0123	138155	internal	PCB109_PCR15_Ecoli_TEX_replicate5
b0123	138155	internal	PCB109_PCR12_Ecoli_NOTEX_replicate4
b0123	138155	internal	PCB109_PCR12_Ecoli_TEX_replicate4
b0124	139094	internal	PCB109_PCR15_Ecoli_NOTEX_replicate4
b0124	139593	internal	PCB109_PCR15_Ecoli_NOTEX_replicate4
b0124	139094	internal	PCB109_PCR15_Ecoli_NOTEX_replicate5
b0124	139593	internal	PCB109_PCR15_Ecoli_NOTEX_replicate5
b0124	140816	internal	PCB109_PCR15_Ecoli_NOTEX_replicate5
b0124	139593	internal	PCB109_PCR15_Ecoli_TEX_replicate4
b0124	140816	internal	PCB109_PCR15_Ecoli_TEX_replicate4
b0124	139094	internal	PCB109_PCR15_Ecoli_TEX_replicate5
b0124	139593	internal	PCB109_PCR15_Ecoli_TEX_replicate5
b0124	140816	internal	PCB109_PCR15_Ecoli_TEX_replicate5
b0124	139094	internal	PCB109_PCR12_Ecoli_NOTEX_replicate4
b0124	139593	internal	PCB109_PCR12_Ecoli_NOTEX_replicate4
b0124	140816	internal	PCB109_PCR12_Ecoli_NOTEX_replicate4
b0124	141263	secondary	PCB109_PCR12_Ecoli_NOTEX_replicate4
b0124	139593	internal	PCB109_PCR12_Ecoli_TEX_replicate4
b0124	141263	secondary	PCB109_PCR12_Ecoli_TEX_replicate4
b0124	140816	internal	DCS109_Ecoli_NOTEX_replicate3
b0125	141373	primary	RNA001_Ecoli_TEX_replicate1
b0125	141360	primary	PCB109_PCR15_Ecoli_NOTEX_replicate4
b0125	141360	primary	PCB109_PCR15_Ecoli_NOTEX_replicate5
b0125	141533	internal	PCB109_PCR15_Ecoli_NOTEX_replicate5
b0125	141742	internal	PCB109_PCR15_Ecoli_NOTEX_replicate5
b0125	141360	primary	PCB109_PCR15_Ecoli_TEX_replicate4
b0125	141533	internal	PCB109_PCR15_Ecoli_TEX_replicate4
b0125	141813	internal	PCB109_PCR15_Ecoli_TEX_replicate4
b0125	141360	primary	PCB109_PCR15_Ecoli_TEX_replicate5
b0125	141533	internal	PCB109_PCR15_Ecoli_TEX_replicate5
b0125	141892	internal	PCB109_PCR15_Ecoli_TEX_replicate5
b0125	141360	primary	PCB109_PCR12_Ecoli_NOTEX_replicate4
b0125	141406	secondary	PCB109_PCR12_Ecoli_NOTEX_replicate4
b0125	141533	internal	PCB109_PCR12_Ecoli_NOTEX_replicate4
b0125	141813	internal	PCB109_PCR12_Ecoli_NOTEX_replicate4
b0125	141360	primary	PCB109_PCR12_Ecoli_TEX_replicate4
b0125	141533	internal	PCB109_PCR12_Ecoli_TEX_replicate4
b0125	141892	internal	PCB109_PCR12_Ecoli_TEX_replicate4
b0125	141360	primary	DCS109_Ecoli_NOTEX_replicate2
b0125	141553	internal	DCS109_Ecoli_NOTEX_replicate2
b0125	141599	internal	DCS109_Ecoli_NOTEX_replicate2
b0125	141652	internal	DCS109_Ecoli_NOTEX_replicate2
b0125	141903	internal	DCS109_Ecoli_NOTEX_replicate2
b0125	141360	primary	DCS109_Ecoli_NOTEX_replicate3
b0125	141553	internal	DCS109_Ecoli_NOTEX_replicate3
b0125	141709	internal	DCS109_Ecoli_NOTEX_replicate3
b0125	141899	internal	DCS109_Ecoli_NOTEX_replicate3
b0126	142703	primary	PCB109_PCR15_Ecoli_NOTEX_replicate4
b0126	142703	primary	PCB109_PCR15_Ecoli_TEX_replicate4
b0126	142253	internal	PCB109_PCR12_Ecoli_NOTEX_replicate4
b0126	142373	internal	PCB109_PCR12_Ecoli_NOTEX_replicate4
b0126	142703	primary	PCB109_PCR12_Ecoli_NOTEX_replicate4
b0126	142254	internal	DCS109_Ecoli_NOTEX_replicate2
b0126	142373	internal	DCS109_Ecoli_NOTEX_replicate2
b0126	142381	internal	DCS109_Ecoli_NOTEX_replicate2
b0126	142660	internal	DCS109_Ecoli_NOTEX_replicate2
b0126	142703	primary	DCS109_Ecoli_NOTEX_replicate2
b0126	142183	internal	DCS109_Ecoli_NOTEX_replicate3
b0126	142253	internal	DCS109_Ecoli_NOTEX_replicate3
b0126	142542	internal	DCS109_Ecoli_NOTEX_replicate3
b0126	142660	internal	DCS109_Ecoli_NOTEX_replicate3
b0126	142703	primary	DCS109_Ecoli_NOTEX_replicate3
b0127	143576	internal	PCB109_PCR15_Ecoli_NOTEX_replicate5
b0127	143576	internal	PCB109_PCR15_Ecoli_TEX_replicate5
b0127	142956	internal	PCB109_PCR12_Ecoli_TEX_replicate4
b0128	144429	internal	PCB109_PCR15_Ecoli_NOTEX_replicate4
b0128	143576	secondary	PCB109_PCR15_Ecoli_NOTEX_replicate5
b0128	144429	internal	PCB109_PCR15_Ecoli_NOTEX_replicate5
b0128	143983	internal	PCB109_PCR15_Ecoli_TEX_replicate4
b0128	144429	internal	PCB109_PCR15_Ecoli_TEX_replicate4
b0128	143576	secondary	PCB109_PCR15_Ecoli_TEX_replicate5
b0128	143983	internal	PCB109_PCR15_Ecoli_TEX_replicate5
b0128	144429	internal	PCB109_PCR15_Ecoli_TEX_replicate5
b0128	143983	internal	PCB109_PCR12_Ecoli_NOTEX_replicate4
b0128	143983	internal	PCB109_PCR12_Ecoli_TEX_replicate4
b0129	144572	primary	RNA001_Ecoli_TEX_replicate1
b0129	144429	secondary	PCB109_PCR15_Ecoli_NOTEX_replicate4
b0129	144560	primary	PCB109_PCR15_Ecoli_NOTEX_replicate4
b0129	144429	secondary	PCB109_PCR15_Ecoli_NOTEX_replicate5
b0129	144560	primary	PCB109_PCR15_Ecoli_NOTEX_replicate5
b0129	144429	secondary	PCB109_PCR15_Ecoli_TEX_replicate4
b0129	144560	primary	PCB109_PCR15_Ecoli_TEX_replicate4
b0129	144429	secondary	PCB109_PCR15_Ecoli_TEX_replicate5
b0129	144560	primary	PCB109_PCR15_Ecoli_TEX_replicate5
b0129	144560	primary	PCB109_PCR12_Ecoli_NOTEX_replicate4
b0129	144560	primary	PCB109_PCR12_Ecoli_TEX_replicate4
b0129	144560	primary	DCS109_Ecoli_NOTEX_replicate2
b0129	144560	primary	DCS109_Ecoli_NOTEX_replicate3
b0130	146074	internal	PCB109_PCR15_Ecoli_NOTEX_replicate4
b0130	146276	internal	PCB109_PCR15_Ecoli_NOTEX_replicate4
b0130	145110	internal	PCB109_PCR15_Ecoli_NOTEX_replicate5
b0130	146276	internal	PCB109_PCR15_Ecoli_NOTEX_replicate5
b0130	146276	internal	PCB109_PCR15_Ecoli_TEX_replicate4
b0130	145110	internal	PCB109_PCR15_Ecoli_TEX_replicate5
b0130	145734	internal	PCB109_PCR15_Ecoli_TEX_replicate5
b0130	146276	internal	PCB109_PCR15_Ecoli_TEX_replicate5
b0130	145055	secondary	PCB109_PCR12_Ecoli_NOTEX_replicate4
b0130	145110	internal	PCB109_PCR12_Ecoli_NOTEX_replicate4
b0130	145728	internal	PCB109_PCR12_Ecoli_NOTEX_replicate4
b0130	146074	internal	PCB109_PCR12_Ecoli_NOTEX_replicate4
b0130	146278	internal	PCB109_PCR12_Ecoli_NOTEX_replicate4
b0130	145728	internal	PCB109_PCR12_Ecoli_TEX_replicate4
b0130	146278	internal	PCB109_PCR12_Ecoli_TEX_replicate4
b0130	146276	internal	DCS109_Ecoli_NOTEX_replicate2
b0130	145825	internal	DCS109_Ecoli_NOTEX_replicate3
b0130	146162	internal	DCS109_Ecoli_NOTEX_replicate3
b0130	146276	internal	DCS109_Ecoli_NOTEX_replicate3
b0131	146742	primary	RNA001_Ecoli_TEX_replicate1
b0131	146754	primary	PCB109_PCR15_Ecoli_NOTEX_replicate4
b0131	146754	primary	PCB109_PCR15_Ecoli_NOTEX_replicate5
b0131	146754	primary	PCB109_PCR15_Ecoli_TEX_replicate4
b0131	146451	internal	PCB109_PCR15_Ecoli_TEX_replicate5
b0131	146754	primary	PCB109_PCR15_Ecoli_TEX_replicate5
b0131	146409	internal	PCB109_PCR12_Ecoli_NOTEX_replicate4
b0131	146713	secondary	PCB109_PCR12_Ecoli_NOTEX_replicate4
b0131	146754	primary	PCB109_PCR12_Ecoli_NOTEX_replicate4
b0131	146754	primary	PCB109_PCR12_Ecoli_TEX_replicate4
b0131	146509	internal	DCS109_Ecoli_NOTEX_replicate2
b0131	146684	internal	DCS109_Ecoli_NOTEX_replicate2
b0131	146704	secondary	DCS109_Ecoli_NOTEX_replicate2
b0131	146715	secondary	DCS109_Ecoli_NOTEX_replicate2
b0131	146754	primary	DCS109_Ecoli_NOTEX_replicate2
b0131	146754	primary	DCS109_Ecoli_NOTEX_replicate3
b0131	146742	primary	RNA002_Ecoli_NOTEX_replicate2
b0132	147774	internal	PCB109_PCR15_Ecoli_TEX_replicate4
b0132	147775	internal	PCB109_PCR15_Ecoli_TEX_replicate5
b0132	147776	internal	PCB109_PCR12_Ecoli_NOTEX_replicate4
b0132	147628	internal	DCS109_Ecoli_NOTEX_replicate2
b0132	147774	internal	DCS109_Ecoli_NOTEX_replicate2
b0132	147775	internal	DCS109_Ecoli_NOTEX_replicate3
b0133	148046	internal	PCB109_PCR15_Ecoli_NOTEX_replicate4
b0133	148114	internal	PCB109_PCR15_Ecoli_NOTEX_replicate4
b0133	148147	internal	PCB109_PCR15_Ecoli_NOTEX_replicate4
b0133	148854	primary	PCB109_PCR15_Ecoli_NOTEX_replicate4
b0133	148147	internal	PCB109_PCR15_Ecoli_NOTEX_replicate5
b0133	149086	secondary	PCB109_PCR15_Ecoli_NOTEX_replicate5
b0133	148046	internal	PCB109_PCR15_Ecoli_TEX_replicate4
b0133	148147	internal	PCB109_PCR15_Ecoli_TEX_replicate4
b0133	148854	secondary	PCB109_PCR15_Ecoli_TEX_replicate4
b0133	149086	secondary	PCB109_PCR15_Ecoli_TEX_replicate4
b0133	148046	internal	PCB109_PCR15_Ecoli_TEX_replicate5
b0133	148147	internal	PCB109_PCR15_Ecoli_TEX_replicate5
b0133	148862	secondary	PCB109_PCR15_Ecoli_TEX_replicate5
b0133	148109	internal	PCB109_PCR12_Ecoli_NOTEX_replicate4
b0133	148147	internal	PCB109_PCR12_Ecoli_NOTEX_replicate4
b0133	148854	secondary	PCB109_PCR12_Ecoli_NOTEX_replicate4
b0133	149086	secondary	PCB109_PCR12_Ecoli_NOTEX_replicate4
b0133	148147	internal	PCB109_PCR12_Ecoli_TEX_replicate4
b0133	148862	secondary	PCB109_PCR12_Ecoli_TEX_replicate4
b0133	148995	secondary	PCB109_PCR12_Ecoli_TEX_replicate4
b0133	148854	primary	DCS109_Ecoli_NOTEX_replicate3
b0134	148854	internal	PCB109_PCR15_Ecoli_NOTEX_replicate4
b0134	149464	internal	PCB109_PCR15_Ecoli_NOTEX_replicate4
b0134	149629	secondary	PCB109_PCR15_Ecoli_NOTEX_replicate4
b0134	149086	internal	PCB109_PCR15_Ecoli_NOTEX_replicate5
b0134	148854	internal	PCB109_PCR15_Ecoli_TEX_replicate4
b0134	149086	internal	PCB109_PCR15_Ecoli_TEX_replicate4
b0134	148862	internal	PCB109_PCR15_Ecoli_TEX_replicate5
b0134	148854	internal	PCB109_PCR12_Ecoli_NOTEX_replicate4
b0134	149086	internal	PCB109_PCR12_Ecoli_NOTEX_replicate4
b0134	149630	primary	PCB109_PCR12_Ecoli_NOTEX_replicate4
b0134	148862	internal	PCB109_PCR12_Ecoli_TEX_replicate4
b0134	148995	internal	PCB109_PCR12_Ecoli_TEX_replicate4
b0134	149125	internal	PCB109_PCR12_Ecoli_TEX_replicate4
b0134	149473	internal	PCB109_PCR12_Ecoli_TEX_replicate4
b0134	149630	primary	DCS109_Ecoli_NOTEX_replicate2
b0134	148854	internal	DCS109_Ecoli_NOTEX_replicate3
b0142	157467	internal	PCB109_PCR15_Ecoli_NOTEX_replicate4
b0142	157467	internal	PCB109_PCR15_Ecoli_NOTEX_replicate5
b0142	157323	internal	PCB109_PCR15_Ecoli_TEX_replicate4
b0142	157955	secondary	PCB109_PCR15_Ecoli_TEX_replicate4
b0142	157467	internal	PCB109_PCR15_Ecoli_TEX_replicate5
b0142	157467	internal	PCB109_PCR12_Ecoli_NOTEX_replicate4
b0142	157955	secondary	PCB109_PCR12_Ecoli_NOTEX_replicate4
b0142	157467	internal	PCB109_PCR12_Ecoli_TEX_replicate4
b0142	157955	secondary	PCB109_PCR12_Ecoli_TEX_replicate4
b0143	159172	primary	PCB109_PCR15_Ecoli_NOTEX_replicate4
b0143	159327	secondary	PCB109_PCR15_Ecoli_NOTEX_replicate4
b0143	159390	secondary	PCB109_PCR15_Ecoli_NOTEX_replicate4
b0143	159172	primary	PCB109_PCR15_Ecoli_NOTEX_replicate5
b0143	159327	secondary	PCB109_PCR15_Ecoli_NOTEX_replicate5
b0143	159390	secondary	PCB109_PCR15_Ecoli_NOTEX_replicate5
b0143	157955	internal	PCB109_PCR15_Ecoli_TEX_replicate4
b0143	158151	internal	PCB109_PCR15_Ecoli_TEX_replicate4
b0143	159172	primary	PCB109_PCR15_Ecoli_TEX_replicate4
b0143	159327	secondary	PCB109_PCR15_Ecoli_TEX_replicate4
b0143	159390	secondary	PCB109_PCR15_Ecoli_TEX_replicate4
b0143	158709	internal	PCB109_PCR15_Ecoli_TEX_replicate5
b0143	158782	internal	PCB109_PCR15_Ecoli_TEX_replicate5
b0143	159172	primary	PCB109_PCR15_Ecoli_TEX_replicate5
b0143	159390	secondary	PCB109_PCR15_Ecoli_TEX_replicate5
b0143	157955	internal	PCB109_PCR12_Ecoli_NOTEX_replicate4
b0143	159172	primary	PCB109_PCR12_Ecoli_NOTEX_replicate4
b0143	159327	secondary	PCB109_PCR12_Ecoli_NOTEX_replicate4
b0143	159390	secondary	PCB109_PCR12_Ecoli_NOTEX_replicate4
b0143	157955	internal	PCB109_PCR12_Ecoli_TEX_replicate4
b0143	159057	internal	PCB109_PCR12_Ecoli_TEX_replicate4
b0143	159172	primary	PCB109_PCR12_Ecoli_TEX_replicate4
b0143	159390	secondary	PCB109_PCR12_Ecoli_TEX_replicate4
b0143	159172	primary	DCS109_Ecoli_NOTEX_replicate2
b0143	159172	primary	DCS109_Ecoli_NOTEX_replicate3
b0143	159159	primary	RNA002_Ecoli_NOTEX_replicate2
b0144	159327	internal	PCB109_PCR15_Ecoli_NOTEX_replicate4
b0144	159390	internal	PCB109_PCR15_Ecoli_NOTEX_replicate4
b0144	159891	internal	PCB109_PCR15_Ecoli_NOTEX_replicate4
b0144	159920	internal	PCB109_PCR15_Ecoli_NOTEX_replicate4
b0144	160289	secondary	PCB109_PCR15_Ecoli_NOTEX_replicate4
b0144	159327	internal	PCB109_PCR15_Ecoli_NOTEX_replicate5
b0144	159390	internal	PCB109_PCR15_Ecoli_NOTEX_replicate5
b0144	159327	internal	PCB109_PCR15_Ecoli_TEX_replicate4
b0144	159390	internal	PCB109_PCR15_Ecoli_TEX_replicate4
b0144	159920	internal	PCB109_PCR15_Ecoli_TEX_replicate4
b0144	159390	internal	PCB109_PCR15_Ecoli_TEX_replicate5
b0144	159327	internal	PCB109_PCR12_Ecoli_NOTEX_replicate4
b0144	159390	internal	PCB109_PCR12_Ecoli_NOTEX_replicate4
b0144	159891	internal	PCB109_PCR12_Ecoli_NOTEX_replicate4
b0144	159920	internal	PCB109_PCR12_Ecoli_NOTEX_replicate4
b0144	160289	secondary	PCB109_PCR12_Ecoli_NOTEX_replicate4
b0144	159390	internal	PCB109_PCR12_Ecoli_TEX_replicate4
b0144	159920	internal	PCB109_PCR12_Ecoli_TEX_replicate4
b0144	159891	internal	DCS109_Ecoli_NOTEX_replicate2
b0144	160339	primary	DCS109_Ecoli_NOTEX_replicate2
b0144	159920	internal	DCS109_Ecoli_NOTEX_replicate3
b0144	160339	secondary	DCS109_Ecoli_NOTEX_replicate3
b0145	160289	internal	PCB109_PCR15_Ecoli_NOTEX_replicate4
b0145	160494	internal	PCB109_PCR15_Ecoli_NOTEX_replicate4
b0145	160553	internal	PCB109_PCR15_Ecoli_NOTEX_replicate4
b0145	160657	primary	PCB109_PCR15_Ecoli_NOTEX_replicate4
b0145	160767	secondary	PCB109_PCR15_Ecoli_NOTEX_replicate4
b0145	160494	internal	PCB109_PCR15_Ecoli_NOTEX_replicate5
b0145	160553	internal	PCB109_PCR15_Ecoli_NOTEX_replicate5
b0145	160751	primary	PCB109_PCR15_Ecoli_NOTEX_replicate5
b0145	160657	primary	PCB109_PCR15_Ecoli_TEX_replicate4
b0145	160767	secondary	PCB109_PCR15_Ecoli_TEX_replicate4
b0145	160494	internal	PCB109_PCR15_Ecoli_TEX_replicate5
b0145	160751	primary	PCB109_PCR15_Ecoli_TEX_replicate5
b0145	160289	internal	PCB109_PCR12_Ecoli_NOTEX_replicate4
b0145	160478	internal	PCB109_PCR12_Ecoli_NOTEX_replicate4
b0145	160657	primary	PCB109_PCR12_Ecoli_NOTEX_replicate4
b0145	160767	secondary	PCB109_PCR12_Ecoli_NOTEX_replicate4
b0145	160494	internal	PCB109_PCR12_Ecoli_TEX_replicate4
b0145	160553	internal	PCB109_PCR12_Ecoli_TEX_replicate4
b0145	160657	secondary	PCB109_PCR12_Ecoli_TEX_replicate4
b0145	160751	primary	PCB109_PCR12_Ecoli_TEX_replicate4
b0145	160339	internal	DCS109_Ecoli_NOTEX_replicate2
b0145	160455	internal	DCS109_Ecoli_NOTEX_replicate2
b0145	160657	primary	DCS109_Ecoli_NOTEX_replicate2
b0145	160339	internal	DCS109_Ecoli_NOTEX_replicate3
b0145	160455	internal	DCS109_Ecoli_NOTEX_replicate3
b0145	160566	internal	DCS109_Ecoli_NOTEX_replicate3
b0145	160614	secondary	DCS109_Ecoli_NOTEX_replicate3
b0145	160657	primary	DCS109_Ecoli_NOTEX_replicate3
b0145	160684	secondary	DCS109_Ecoli_NOTEX_replicate3
b0145	160751	secondary	DCS109_Ecoli_NOTEX_replicate3
b0145	160644	primary	RNA002_Ecoli_NOTEX_replicate2
b0146	161058	internal	PCB109_PCR15_Ecoli_NOTEX_replicate4
b0146	161058	internal	PCB109_PCR15_Ecoli_NOTEX_replicate5
b0146	161058	internal	PCB109_PCR15_Ecoli_TEX_replicate4
b0146	161058	internal	PCB109_PCR15_Ecoli_TEX_replicate5
b0146	161058	internal	PCB109_PCR12_Ecoli_NOTEX_replicate4
b0146	161058	internal	PCB109_PCR12_Ecoli_TEX_replicate4
b0146	161403	internal	DCS109_Ecoli_NOTEX_replicate3
b0148	162077	secondary	PCB109_PCR15_Ecoli_NOTEX_replicate4
b0148	163288	internal	PCB109_PCR15_Ecoli_NOTEX_replicate4
b0148	164234	internal	PCB109_PCR15_Ecoli_NOTEX_replicate4
b0148	163288	internal	PCB109_PCR15_Ecoli_NOTEX_replicate5
b0148	164234	internal	PCB109_PCR15_Ecoli_NOTEX_replicate5
b0148	164356	internal	PCB109_PCR15_Ecoli_NOTEX_replicate5
b0148	162077	secondary	PCB109_PCR15_Ecoli_TEX_replicate4
b0148	162922	internal	PCB109_PCR15_Ecoli_TEX_replicate4
b0148	163288	internal	PCB109_PCR15_Ecoli_TEX_replicate4
b0148	164234	internal	PCB109_PCR15_Ecoli_TEX_replicate4
b0148	164356	internal	PCB109_PCR15_Ecoli_TEX_replicate4
b0148	164234	internal	PCB109_PCR15_Ecoli_TEX_replicate5
b0148	164356	internal	PCB109_PCR15_Ecoli_TEX_replicate5
b0148	162077	primary	PCB109_PCR12_Ecoli_NOTEX_replicate4
b0148	163288	internal	PCB109_PCR12_Ecoli_NOTEX_replicate4
b0148	163714	internal	PCB109_PCR12_Ecoli_NOTEX_replicate4
b0148	164234	internal	PCB109_PCR12_Ecoli_NOTEX_replicate4
b0148	164356	internal	PCB109_PCR12_Ecoli_NOTEX_replicate4
b0148	162077	secondary	PCB109_PCR12_Ecoli_TEX_replicate4
b0148	162263	internal	PCB109_PCR12_Ecoli_TEX_replicate4
b0148	164234	internal	PCB109_PCR12_Ecoli_TEX_replicate4
b0148	164356	internal	PCB109_PCR12_Ecoli_TEX_replicate4
b0148	164234	internal	DCS109_Ecoli_NOTEX_replicate2
b0148	162077	primary	DCS109_Ecoli_NOTEX_replicate3
b0148	164234	internal	DCS109_Ecoli_NOTEX_replicate3
b0149	165923	internal	PCB109_PCR15_Ecoli_NOTEX_replicate4
b0149	165923	internal	PCB109_PCR15_Ecoli_NOTEX_replicate5
b0149	165399	internal	PCB109_PCR15_Ecoli_TEX_replicate4
b0149	165927	internal	PCB109_PCR15_Ecoli_TEX_replicate4
b0149	166467	internal	PCB109_PCR15_Ecoli_TEX_replicate4
b0149	164570	secondary	PCB109_PCR15_Ecoli_TEX_replicate5
b0149	165923	internal	PCB109_PCR15_Ecoli_TEX_replicate5
b0149	165923	internal	PCB109_PCR12_Ecoli_NOTEX_replicate4
b0149	167013	internal	PCB109_PCR12_Ecoli_NOTEX_replicate4
b0149	165923	internal	PCB109_PCR12_Ecoli_TEX_replicate4
b0149	166565	internal	DCS109_Ecoli_NOTEX_replicate3
b0150	169585	internal	PCB109_PCR15_Ecoli_NOTEX_replicate4
b0150	169475	internal	PCB109_PCR15_Ecoli_NOTEX_replicate5
b0150	169585	internal	PCB109_PCR15_Ecoli_NOTEX_replicate5
b0150	169585	internal	PCB109_PCR15_Ecoli_TEX_replicate4
b0150	169475	internal	PCB109_PCR15_Ecoli_TEX_replicate5
b0150	169585	internal	PCB109_PCR15_Ecoli_TEX_replicate5
b0150	169475	internal	PCB109_PCR12_Ecoli_NOTEX_replicate4
b0150	169585	internal	PCB109_PCR12_Ecoli_NOTEX_replicate4
b0150	169585	internal	PCB109_PCR12_Ecoli_TEX_replicate4
b0151	169585	primary	PCB109_PCR15_Ecoli_NOTEX_replicate4
b0151	169585	primary	PCB109_PCR15_Ecoli_NOTEX_replicate5
b0151	169585	primary	PCB109_PCR15_Ecoli_TEX_replicate4
b0151	169585	primary	PCB109_PCR15_Ecoli_TEX_replicate5
b0151	169585	primary	PCB109_PCR12_Ecoli_NOTEX_replicate4
b0151	169585	primary	PCB109_PCR12_Ecoli_TEX_replicate4
b0153	172786	internal	PCB109_PCR15_Ecoli_NOTEX_replicate4
b0153	173428	internal	PCB109_PCR15_Ecoli_NOTEX_replicate4
b0153	172786	internal	PCB109_PCR15_Ecoli_NOTEX_replicate5
b0153	173374	internal	PCB109_PCR15_Ecoli_NOTEX_replicate5
b0153	173430	internal	PCB109_PCR15_Ecoli_NOTEX_replicate5
b0153	172732	internal	PCB109_PCR15_Ecoli_TEX_replicate4
b0153	172786	internal	PCB109_PCR15_Ecoli_TEX_replicate4
b0153	173429	internal	PCB109_PCR15_Ecoli_TEX_replicate4
b0153	172786	internal	PCB109_PCR15_Ecoli_TEX_replicate5
b0153	173429	internal	PCB109_PCR15_Ecoli_TEX_replicate5
b0153	172786	internal	PCB109_PCR12_Ecoli_NOTEX_replicate4
b0153	173374	internal	PCB109_PCR12_Ecoli_NOTEX_replicate4
b0153	173430	internal	PCB109_PCR12_Ecoli_NOTEX_replicate4
b0153	172786	internal	PCB109_PCR12_Ecoli_TEX_replicate4
b0153	173374	internal	PCB109_PCR12_Ecoli_TEX_replicate4
b0153	173429	internal	PCB109_PCR12_Ecoli_TEX_replicate4
b0153	173374	internal	DCS109_Ecoli_NOTEX_replicate2
b0153	173374	internal	DCS109_Ecoli_NOTEX_replicate3
b0153	173428	internal	DCS109_Ecoli_NOTEX_replicate3
b0154	174695	internal	PCB109_PCR15_Ecoli_NOTEX_replicate4
b0154	174919	secondary	PCB109_PCR15_Ecoli_NOTEX_replicate4
b0154	174025	internal	PCB109_PCR15_Ecoli_NOTEX_replicate5
b0154	174695	internal	PCB109_PCR15_Ecoli_NOTEX_replicate5
b0154	174919	secondary	PCB109_PCR15_Ecoli_NOTEX_replicate5
b0154	174667	internal	PCB109_PCR15_Ecoli_TEX_replicate4
b0154	174695	internal	PCB109_PCR15_Ecoli_TEX_replicate4
b0154	174331	internal	PCB109_PCR15_Ecoli_TEX_replicate5
b0154	174447	internal	PCB109_PCR15_Ecoli_TEX_replicate5
b0154	174695	internal	PCB109_PCR15_Ecoli_TEX_replicate5
b0154	174919	secondary	PCB109_PCR15_Ecoli_TEX_replicate5
b0154	174447	internal	PCB109_PCR12_Ecoli_NOTEX_replicate4
b0154	174695	internal	PCB109_PCR12_Ecoli_NOTEX_replicate4
b0154	174919	secondary	PCB109_PCR12_Ecoli_NOTEX_replicate4
b0154	173929	internal	PCB109_PCR12_Ecoli_TEX_replicate4
b0154	174025	internal	PCB109_PCR12_Ecoli_TEX_replicate4
b0154	174331	internal	PCB109_PCR12_Ecoli_TEX_replicate4
b0154	174695	internal	PCB109_PCR12_Ecoli_TEX_replicate4
b0154	174796	internal	PCB109_PCR12_Ecoli_TEX_replicate4
b0154	174919	secondary	PCB109_PCR12_Ecoli_TEX_replicate4
b0154	173981	internal	DCS109_Ecoli_NOTEX_replicate2
b0154	174687	internal	DCS109_Ecoli_NOTEX_replicate2
b0154	174965	primary	DCS109_Ecoli_NOTEX_replicate2
b0154	175161	secondary	DCS109_Ecoli_NOTEX_replicate2
b0154	173920	internal	DCS109_Ecoli_NOTEX_replicate3
b0154	174695	internal	DCS109_Ecoli_NOTEX_replicate3
b0154	174774	internal	DCS109_Ecoli_NOTEX_replicate3
b0154	174919	secondary	DCS109_Ecoli_NOTEX_replicate3
b0154	174965	primary	DCS109_Ecoli_NOTEX_replicate3
b0155	174933	secondary	PCB109_PCR15_Ecoli_NOTEX_replicate4
b0155	175012	secondary	PCB109_PCR15_Ecoli_NOTEX_replicate4
b0155	175511	internal	PCB109_PCR15_Ecoli_NOTEX_replicate4
b0155	175924	internal	PCB109_PCR15_Ecoli_NOTEX_replicate4
b0155	176015	internal	PCB109_PCR15_Ecoli_NOTEX_replicate4
b0155	176203	internal	PCB109_PCR15_Ecoli_NOTEX_replicate4
b0155	176414	internal	PCB109_PCR15_Ecoli_NOTEX_replicate4
b0155	175012	secondary	PCB109_PCR15_Ecoli_NOTEX_replicate5
b0155	175511	internal	PCB109_PCR15_Ecoli_NOTEX_replicate5
b0155	175924	internal	PCB109_PCR15_Ecoli_NOTEX_replicate5
b0155	176015	internal	PCB109_PCR15_Ecoli_NOTEX_replicate5
b0155	176203	internal	PCB109_PCR15_Ecoli_NOTEX_replicate5
b0155	176414	internal	PCB109_PCR15_Ecoli_NOTEX_replicate5
b0155	175012	secondary	PCB109_PCR15_Ecoli_TEX_replicate4
b0155	175511	internal	PCB109_PCR15_Ecoli_TEX_replicate4
b0155	175924	internal	PCB109_PCR15_Ecoli_TEX_replicate4
b0155	176015	internal	PCB109_PCR15_Ecoli_TEX_replicate4
b0155	176203	internal	PCB109_PCR15_Ecoli_TEX_replicate4
b0155	176276	internal	PCB109_PCR15_Ecoli_TEX_replicate4
b0155	176414	internal	PCB109_PCR15_Ecoli_TEX_replicate4
b0155	175012	secondary	PCB109_PCR15_Ecoli_TEX_replicate5
b0155	175924	internal	PCB109_PCR15_Ecoli_TEX_replicate5
b0155	176015	internal	PCB109_PCR15_Ecoli_TEX_replicate5
b0155	176203	internal	PCB109_PCR15_Ecoli_TEX_replicate5
b0155	176414	internal	PCB109_PCR15_Ecoli_TEX_replicate5
b0155	174942	secondary	PCB109_PCR12_Ecoli_NOTEX_replicate4
b0155	175012	secondary	PCB109_PCR12_Ecoli_NOTEX_replicate4
b0155	175924	internal	PCB109_PCR12_Ecoli_NOTEX_replicate4
b0155	176015	internal	PCB109_PCR12_Ecoli_NOTEX_replicate4
b0155	176203	internal	PCB109_PCR12_Ecoli_NOTEX_replicate4
b0155	176414	internal	PCB109_PCR12_Ecoli_NOTEX_replicate4
b0155	176521	internal	PCB109_PCR12_Ecoli_NOTEX_replicate4
b0155	175012	secondary	PCB109_PCR12_Ecoli_TEX_replicate4
b0155	175924	internal	PCB109_PCR12_Ecoli_TEX_replicate4
b0155	176015	internal	PCB109_PCR12_Ecoli_TEX_replicate4
b0155	176203	internal	PCB109_PCR12_Ecoli_TEX_replicate4
b0155	176414	internal	PCB109_PCR12_Ecoli_TEX_replicate4
b0155	176490	internal	DCS109_Ecoli_NOTEX_replicate2
b0155	175012	secondary	DCS109_Ecoli_NOTEX_replicate3
b0155	176414	internal	DCS109_Ecoli_NOTEX_replicate3
b0156	176557	primary	PCB109_PCR15_Ecoli_NOTEX_replicate4
b0156	176561	secondary	PCB109_PCR12_Ecoli_NOTEX_replicate4
b0156	176850	internal	PCB109_PCR12_Ecoli_NOTEX_replicate4
b0156	176598	primary	DCS109_Ecoli_NOTEX_replicate2
b0156	176598	secondary	DCS109_Ecoli_NOTEX_replicate3
b0157	177700	primary	PCB109_PCR15_Ecoli_NOTEX_replicate4
b0157	177700	primary	PCB109_PCR15_Ecoli_NOTEX_replicate5
b0157	177700	primary	PCB109_PCR15_Ecoli_TEX_replicate4
b0157	177085	internal	PCB109_PCR15_Ecoli_TEX_replicate5
b0157	177700	primary	PCB109_PCR15_Ecoli_TEX_replicate5
b0157	177085	internal	PCB109_PCR12_Ecoli_NOTEX_replicate4
b0157	177700	primary	PCB109_PCR12_Ecoli_NOTEX_replicate4
b0157	177350	internal	PCB109_PCR12_Ecoli_TEX_replicate4
b0157	177700	primary	PCB109_PCR12_Ecoli_TEX_replicate4
b0157	177700	primary	DCS109_Ecoli_NOTEX_replicate2
b0157	177169	internal	DCS109_Ecoli_NOTEX_replicate3
b0157	177700	secondary	DCS109_Ecoli_NOTEX_replicate3
b0158	177700	internal	PCB109_PCR15_Ecoli_NOTEX_replicate4
b0158	177700	internal	PCB109_PCR15_Ecoli_NOTEX_replicate5
b0158	177700	internal	PCB109_PCR15_Ecoli_TEX_replicate4
b0158	178166	internal	PCB109_PCR15_Ecoli_TEX_replicate4
b0158	177700	internal	PCB109_PCR15_Ecoli_TEX_replicate5
b0158	178146	internal	PCB109_PCR15_Ecoli_TEX_replicate5
b0158	177700	internal	PCB109_PCR12_Ecoli_NOTEX_replicate4
b0158	177700	internal	PCB109_PCR12_Ecoli_TEX_replicate4
b0158	177700	internal	DCS109_Ecoli_NOTEX_replicate2
b0158	178639	secondary	DCS109_Ecoli_NOTEX_replicate2
b0158	177700	internal	DCS109_Ecoli_NOTEX_replicate3
b0159	178931	internal	PCB109_PCR15_Ecoli_NOTEX_replicate4
b0159	178986	internal	PCB109_PCR15_Ecoli_NOTEX_replicate4
b0159	179181	secondary	PCB109_PCR15_Ecoli_NOTEX_replicate4
b0159	178931	internal	PCB109_PCR15_Ecoli_NOTEX_replicate5
b0159	178931	internal	PCB109_PCR15_Ecoli_TEX_replicate4
b0159	178931	internal	PCB109_PCR15_Ecoli_TEX_replicate5
b0159	178986	internal	PCB109_PCR12_Ecoli_NOTEX_replicate4
b0159	179181	secondary	PCB109_PCR12_Ecoli_NOTEX_replicate4
b0159	178931	internal	PCB109_PCR12_Ecoli_TEX_replicate4
b0159	178986	internal	PCB109_PCR12_Ecoli_TEX_replicate4
b0159	178639	internal	DCS109_Ecoli_NOTEX_replicate2
b0159	178915	internal	DCS109_Ecoli_NOTEX_replicate2
b0159	179043	internal	DCS109_Ecoli_NOTEX_replicate2
b0159	179152	internal	DCS109_Ecoli_NOTEX_replicate2
b0159	178901	internal	DCS109_Ecoli_NOTEX_replicate3
b0159	178915	internal	DCS109_Ecoli_NOTEX_replicate3
b0159	179043	internal	DCS109_Ecoli_NOTEX_replicate3
b0159	179181	primary	DCS109_Ecoli_NOTEX_replicate3
b0160	179198	primary	PCB109_PCR15_Ecoli_NOTEX_replicate4
b0160	180436	internal	PCB109_PCR15_Ecoli_NOTEX_replicate4
b0160	179198	primary	PCB109_PCR15_Ecoli_NOTEX_replicate5
b0160	180436	internal	PCB109_PCR15_Ecoli_NOTEX_replicate5
b0160	179198	primary	PCB109_PCR15_Ecoli_TEX_replicate4
b0160	179198	primary	PCB109_PCR15_Ecoli_TEX_replicate5
b0160	180436	internal	PCB109_PCR15_Ecoli_TEX_replicate5
b0160	179198	secondary	PCB109_PCR12_Ecoli_NOTEX_replicate4
b0160	180436	internal	PCB109_PCR12_Ecoli_NOTEX_replicate4
b0160	179198	primary	PCB109_PCR12_Ecoli_TEX_replicate4
b0160	180436	internal	PCB109_PCR12_Ecoli_TEX_replicate4
b0160	179198	primary	DCS109_Ecoli_NOTEX_replicate2
b0160	179198	primary	DCS109_Ecoli_NOTEX_replicate3
b0161	181719	internal	RNA001_Ecoli_TEX_replicate1
b0161	180837	primary	PCB109_PCR15_Ecoli_NOTEX_replicate4
b0161	180844	primary	PCB109_PCR12_Ecoli_NOTEX_replicate4
b0161	181772	internal	PCB109_PCR12_Ecoli_TEX_replicate4
b0161	180844	primary	DCS109_Ecoli_NOTEX_replicate2
b0161	180844	primary	DCS109_Ecoli_NOTEX_replicate3
b0162	182447	primary	PCB109_PCR15_Ecoli_NOTEX_replicate4
b0162	182447	primary	PCB109_PCR15_Ecoli_TEX_replicate4
b0162	182447	primary	PCB109_PCR15_Ecoli_TEX_replicate5
b0162	182447	primary	PCB109_PCR12_Ecoli_NOTEX_replicate4
b0162	182447	primary	PCB109_PCR12_Ecoli_TEX_replicate4
b0162	182447	primary	DCS109_Ecoli_NOTEX_replicate2
b0162	182447	primary	DCS109_Ecoli_NOTEX_replicate3
b0163	184193	primary	PCB109_PCR15_Ecoli_NOTEX_replicate4
b0163	184193	primary	PCB109_PCR15_Ecoli_NOTEX_replicate5
b0163	184193	primary	PCB109_PCR15_Ecoli_TEX_replicate4
b0163	184193	primary	PCB109_PCR15_Ecoli_TEX_replicate5
b0163	184193	primary	PCB109_PCR12_Ecoli_NOTEX_replicate4
b0163	184193	primary	PCB109_PCR12_Ecoli_TEX_replicate4
b0163	184193	primary	DCS109_Ecoli_NOTEX_replicate2
b0163	184193	primary	DCS109_Ecoli_NOTEX_replicate3
b0164	184825	internal	PCB109_PCR12_Ecoli_TEX_replicate4
b0164	185110	secondary	PCB109_PCR12_Ecoli_TEX_replicate4
b0164	185321	primary	DCS109_Ecoli_NOTEX_replicate2
b0164	185321	primary	DCS109_Ecoli_NOTEX_replicate3
b0164	185364	primary	DCS109_Ecoli_NOTEX_replicate3
b0166	185964	primary	RNA001_Ecoli_TEX_replicate1
b0166	185432	internal	PCB109_PCR15_Ecoli_NOTEX_replicate4
b0166	185976	primary	PCB109_PCR15_Ecoli_NOTEX_replicate4
b0166	185432	internal	PCB109_PCR15_Ecoli_NOTEX_replicate5
b0166	185976	primary	PCB109_PCR15_Ecoli_NOTEX_replicate5
b0166	185432	internal	PCB109_PCR15_Ecoli_TEX_replicate4
b0166	185729	internal	PCB109_PCR15_Ecoli_TEX_replicate4
b0166	185976	primary	PCB109_PCR15_Ecoli_TEX_replicate4
b0166	185976	primary	PCB109_PCR15_Ecoli_TEX_replicate5
b0166	185432	internal	PCB109_PCR12_Ecoli_NOTEX_replicate4
b0166	185803	internal	PCB109_PCR12_Ecoli_NOTEX_replicate4
b0166	185976	primary	PCB109_PCR12_Ecoli_NOTEX_replicate4
b0166	186073	secondary	PCB109_PCR12_Ecoli_NOTEX_replicate4
b0166	185917	internal	PCB109_PCR12_Ecoli_TEX_replicate4
b0166	185976	primary	PCB109_PCR12_Ecoli_TEX_replicate4
b0166	185321	internal	DCS109_Ecoli_NOTEX_replicate2
b0166	185753	internal	DCS109_Ecoli_NOTEX_replicate2
b0166	185936	internal	DCS109_Ecoli_NOTEX_replicate2
b0166	185950	secondary	DCS109_Ecoli_NOTEX_replicate2
b0166	185976	primary	DCS109_Ecoli_NOTEX_replicate2
b0166	186020	secondary	DCS109_Ecoli_NOTEX_replicate2
b0166	185321	internal	DCS109_Ecoli_NOTEX_replicate3
b0166	185364	internal	DCS109_Ecoli_NOTEX_replicate3
b0166	185753	internal	DCS109_Ecoli_NOTEX_replicate3
b0166	185813	internal	DCS109_Ecoli_NOTEX_replicate3
b0166	185936	internal	DCS109_Ecoli_NOTEX_replicate3
b0166	185976	primary	DCS109_Ecoli_NOTEX_replicate3
b0166	186020	secondary	DCS109_Ecoli_NOTEX_replicate3
b0166	185964	primary	RNA002_Ecoli_NOTEX_replicate2
b0167	188917	primary	PCB109_PCR15_Ecoli_NOTEX_replicate4
b0167	187738	internal	PCB109_PCR15_Ecoli_TEX_replicate4
b0167	186073	internal	PCB109_PCR12_Ecoli_NOTEX_replicate4
b0167	188917	secondary	PCB109_PCR12_Ecoli_NOTEX_replicate4
b0167	186020	internal	DCS109_Ecoli_NOTEX_replicate2
b0167	186020	internal	DCS109_Ecoli_NOTEX_replicate3
b0168	188917	internal	PCB109_PCR15_Ecoli_NOTEX_replicate4
b0168	189436	internal	PCB109_PCR15_Ecoli_NOTEX_replicate4
b0168	189553	secondary	PCB109_PCR15_Ecoli_NOTEX_replicate4
b0168	189436	internal	PCB109_PCR15_Ecoli_TEX_replicate4
b0168	188917	internal	PCB109_PCR12_Ecoli_NOTEX_replicate4
b0168	189553	primary	PCB109_PCR12_Ecoli_NOTEX_replicate4
b0168	189331	internal	DCS109_Ecoli_NOTEX_replicate2
b0168	189463	internal	DCS109_Ecoli_NOTEX_replicate2
b0168	189553	primary	DCS109_Ecoli_NOTEX_replicate2
b0168	189463	internal	DCS109_Ecoli_NOTEX_replicate3
b0168	189553	primary	DCS109_Ecoli_NOTEX_replicate3
b0169	189803	secondary	RNA001_Ecoli_TEX_replicate1
b0169	189858	secondary	RNA001_Ecoli_TEX_replicate1
b0169	190127	internal	RNA001_Ecoli_TEX_replicate1
b0169	190218	internal	RNA001_Ecoli_TEX_replicate1
[truncated: 36,521 more rows]
