# Supplementary material
Source: HighWire-hosted journal article supplement (doi:10.1101/rna.078937.121)
Supplement: Supplementary_Table5.xlsx [file Supplementary_Table5.xlsx]

## Sheet: Sheet1
gene	end3	end3_type	sample
b0002	2996	primary	PCB109_PCR15_Ecoli_TEX_replicate5
b0003	3857	primary	PCB109_PCR15_Ecoli_TEX_replicate4
b0003	2996	internal	PCB109_PCR15_Ecoli_TEX_replicate5
b0003	3164	internal	PCB109_PCR15_Ecoli_TEX_replicate5
b0003	3857	primary	PCB109_PCR12_Ecoli_NOTEX_replicate4
b0004	3857	internal	PCB109_PCR15_Ecoli_TEX_replicate4
b0004	3857	internal	PCB109_PCR12_Ecoli_NOTEX_replicate4
b0004	5075	secondary	PCB109_PCR12_Ecoli_NOTEX_replicate4
b0004	5076	primary	PCB109_PCR12_Ecoli_TEX_replicate4
b0004	5075	primary	DCS109_Ecoli_NOTEX_replicate2
b0004	5074	primary	DCS109_Ecoli_NOTEX_replicate3
b0007	6615	internal	PCB109_PCR12_Ecoli_TEX_replicate4
b0008	9230	primary	RNA001_Ecoli_TEX_replicate1
b0008	9230	primary	PCB109_PCR15_Ecoli_NOTEX_replicate4
b0008	9230	primary	PCB109_PCR15_Ecoli_NOTEX_replicate5
b0008	9230	primary	PCB109_PCR15_Ecoli_TEX_replicate4
b0008	9230	primary	PCB109_PCR15_Ecoli_TEX_replicate5
b0008	9230	primary	PCB109_PCR12_Ecoli_NOTEX_replicate4
b0008	9228	primary	PCB109_PCR12_Ecoli_TEX_replicate4
b0008	9230	primary	DCS109_Ecoli_NOTEX_replicate2
b0008	9230	primary	DCS109_Ecoli_NOTEX_replicate3
b0008	9230	primary	RNA002_Ecoli_NOTEX_replicate2
b0009	9888	internal	PCB109_PCR15_Ecoli_NOTEX_replicate4
b0009	9920	primary	PCB109_PCR15_Ecoli_NOTEX_replicate4
b0009	9920	primary	PCB109_PCR15_Ecoli_TEX_replicate4
b0009	9920	primary	PCB109_PCR15_Ecoli_TEX_replicate5
b0009	9888	primary	PCB109_PCR12_Ecoli_NOTEX_replicate4
b0009	9920	secondary	PCB109_PCR12_Ecoli_NOTEX_replicate4
b0009	9920	primary	DCS109_Ecoli_NOTEX_replicate2
b0010	9893	primary	RNA001_Ecoli_TEX_replicate1
b0010	9895	primary	PCB109_PCR15_Ecoli_NOTEX_replicate4
b0010	9894	primary	PCB109_PCR15_Ecoli_NOTEX_replicate5
b0010	10399	internal	PCB109_PCR15_Ecoli_NOTEX_replicate5
b0010	9894	primary	PCB109_PCR15_Ecoli_TEX_replicate5
b0010	10298	internal	PCB109_PCR15_Ecoli_TEX_replicate5
b0010	9895	primary	PCB109_PCR12_Ecoli_NOTEX_replicate4
b0010	9894	primary	PCB109_PCR12_Ecoli_TEX_replicate4
b0010	10323	internal	PCB109_PCR12_Ecoli_TEX_replicate4
b0010	9894	primary	DCS109_Ecoli_NOTEX_replicate2
b0011	10399	primary	PCB109_PCR15_Ecoli_NOTEX_replicate5
b0014	13784	internal	RNA001_Ecoli_TEX_replicate1
b0014	14070	internal	RNA001_Ecoli_TEX_replicate1
b0014	14144	primary	RNA001_Ecoli_TEX_replicate1
b0014	14145	primary	PCB109_PCR15_Ecoli_NOTEX_replicate4
b0014	14144	primary	PCB109_PCR15_Ecoli_NOTEX_replicate5
b0014	14070	internal	PCB109_PCR15_Ecoli_TEX_replicate4
b0014	14145	primary	PCB109_PCR15_Ecoli_TEX_replicate4
b0014	14070	internal	PCB109_PCR15_Ecoli_TEX_replicate5
b0014	14144	primary	PCB109_PCR15_Ecoli_TEX_replicate5
b0014	14070	internal	PCB109_PCR12_Ecoli_NOTEX_replicate4
b0014	14144	primary	PCB109_PCR12_Ecoli_NOTEX_replicate4
b0014	14070	internal	PCB109_PCR12_Ecoli_TEX_replicate4
b0014	14144	primary	PCB109_PCR12_Ecoli_TEX_replicate4
b0014	12885	internal	DCS109_Ecoli_NOTEX_replicate2
b0014	14145	primary	DCS109_Ecoli_NOTEX_replicate2
b0014	14145	primary	DCS109_Ecoli_NOTEX_replicate3
b0015	15330	primary	RNA001_Ecoli_TEX_replicate1
b0015	15417	secondary	RNA001_Ecoli_TEX_replicate1
b0015	14846	internal	PCB109_PCR15_Ecoli_NOTEX_replicate4
b0015	15330	primary	PCB109_PCR15_Ecoli_NOTEX_replicate4
b0015	15526	secondary	PCB109_PCR15_Ecoli_NOTEX_replicate4
b0015	15576	secondary	PCB109_PCR15_Ecoli_NOTEX_replicate4
b0015	14802	internal	PCB109_PCR15_Ecoli_NOTEX_replicate5
b0015	15330	primary	PCB109_PCR15_Ecoli_NOTEX_replicate5
b0015	15526	secondary	PCB109_PCR15_Ecoli_NOTEX_replicate5
b0015	15575	secondary	PCB109_PCR15_Ecoli_NOTEX_replicate5
b0015	14876	internal	PCB109_PCR15_Ecoli_TEX_replicate4
b0015	15074	internal	PCB109_PCR15_Ecoli_TEX_replicate4
b0015	15330	primary	PCB109_PCR15_Ecoli_TEX_replicate4
b0015	15575	secondary	PCB109_PCR15_Ecoli_TEX_replicate4
b0015	14807	internal	PCB109_PCR15_Ecoli_TEX_replicate5
b0015	14971	internal	PCB109_PCR15_Ecoli_TEX_replicate5
b0015	15330	primary	PCB109_PCR15_Ecoli_TEX_replicate5
b0015	15421	secondary	PCB109_PCR15_Ecoli_TEX_replicate5
b0015	15575	secondary	PCB109_PCR15_Ecoli_TEX_replicate5
b0015	15072	internal	PCB109_PCR12_Ecoli_NOTEX_replicate4
b0015	15330	primary	PCB109_PCR12_Ecoli_NOTEX_replicate4
b0015	15403	secondary	PCB109_PCR12_Ecoli_NOTEX_replicate4
b0015	15525	secondary	PCB109_PCR12_Ecoli_NOTEX_replicate4
b0015	15574	secondary	PCB109_PCR12_Ecoli_NOTEX_replicate4
b0015	15330	primary	PCB109_PCR12_Ecoli_TEX_replicate4
b0015	15421	secondary	PCB109_PCR12_Ecoli_TEX_replicate4
b0015	15576	secondary	PCB109_PCR12_Ecoli_TEX_replicate4
b0015	15330	primary	DCS109_Ecoli_NOTEX_replicate2
b0015	15330	primary	DCS109_Ecoli_NOTEX_replicate3
b0016	16608	primary	RNA001_Ecoli_TEX_replicate1
b0018	16644	primary	PCB109_PCR15_Ecoli_NOTEX_replicate4
b0018	16644	primary	PCB109_PCR15_Ecoli_NOTEX_replicate5
b0018	16642	primary	PCB109_PCR15_Ecoli_TEX_replicate5
b0018	16642	primary	PCB109_PCR12_Ecoli_NOTEX_replicate4
b0018	16642	primary	PCB109_PCR12_Ecoli_TEX_replicate4
b0018	16642	primary	DCS109_Ecoli_NOTEX_replicate2
b0019	18689	primary	RNA001_Ecoli_TEX_replicate1
b0019	18114	internal	PCB109_PCR15_Ecoli_NOTEX_replicate4
b0019	18695	primary	PCB109_PCR15_Ecoli_NOTEX_replicate4
b0019	18695	primary	PCB109_PCR15_Ecoli_NOTEX_replicate5
b0019	18695	primary	PCB109_PCR15_Ecoli_TEX_replicate4
b0019	18695	primary	PCB109_PCR15_Ecoli_TEX_replicate5
b0019	18696	primary	PCB109_PCR12_Ecoli_NOTEX_replicate4
b0019	18695	primary	PCB109_PCR12_Ecoli_TEX_replicate4
b0020	19742	primary	PCB109_PCR12_Ecoli_NOTEX_replicate4
b0023	20767	primary	RNA001_Ecoli_TEX_replicate1
b0023	20765	primary	PCB109_PCR15_Ecoli_NOTEX_replicate4
b0023	20843	internal	PCB109_PCR15_Ecoli_NOTEX_replicate4
b0023	20875	internal	PCB109_PCR15_Ecoli_NOTEX_replicate4
b0023	20922	internal	PCB109_PCR15_Ecoli_NOTEX_replicate4
b0023	20764	primary	PCB109_PCR15_Ecoli_NOTEX_replicate5
b0023	20875	internal	PCB109_PCR15_Ecoli_NOTEX_replicate5
b0023	20766	primary	PCB109_PCR15_Ecoli_TEX_replicate4
b0023	20875	internal	PCB109_PCR15_Ecoli_TEX_replicate4
b0023	20766	primary	PCB109_PCR15_Ecoli_TEX_replicate5
b0023	20766	primary	PCB109_PCR12_Ecoli_NOTEX_replicate4
b0023	20843	internal	PCB109_PCR12_Ecoli_NOTEX_replicate4
b0023	20875	internal	PCB109_PCR12_Ecoli_NOTEX_replicate4
b0023	20912	internal	PCB109_PCR12_Ecoli_NOTEX_replicate4
b0023	20762	primary	PCB109_PCR12_Ecoli_TEX_replicate4
b0023	20875	internal	PCB109_PCR12_Ecoli_TEX_replicate4
b0023	20765	primary	DCS109_Ecoli_NOTEX_replicate2
b0023	20843	internal	DCS109_Ecoli_NOTEX_replicate2
b0023	20765	primary	DCS109_Ecoli_NOTEX_replicate3
b0023	20875	internal	DCS109_Ecoli_NOTEX_replicate3
b0023	20768	primary	RNA002_Ecoli_NOTEX_replicate2
b0024	21656	primary	PCB109_PCR15_Ecoli_NOTEX_replicate4
b0024	21696	primary	PCB109_PCR15_Ecoli_TEX_replicate4
b0025	21656	internal	PCB109_PCR15_Ecoli_NOTEX_replicate4
b0025	21821	internal	PCB109_PCR15_Ecoli_NOTEX_replicate4
b0025	22217	internal	PCB109_PCR15_Ecoli_NOTEX_replicate4
b0025	22232	internal	PCB109_PCR15_Ecoli_NOTEX_replicate5
b0025	21696	internal	PCB109_PCR15_Ecoli_TEX_replicate4
b0025	21822	internal	PCB109_PCR15_Ecoli_TEX_replicate4
b0025	21952	internal	PCB109_PCR15_Ecoli_TEX_replicate4
b0025	22217	internal	PCB109_PCR15_Ecoli_TEX_replicate5
b0025	21755	internal	PCB109_PCR12_Ecoli_NOTEX_replicate4
b0025	21862	internal	PCB109_PCR12_Ecoli_NOTEX_replicate4
b0025	21950	internal	PCB109_PCR12_Ecoli_NOTEX_replicate4
b0025	21971	internal	PCB109_PCR12_Ecoli_NOTEX_replicate4
b0025	22135	internal	PCB109_PCR12_Ecoli_NOTEX_replicate4
b0025	22219	internal	PCB109_PCR12_Ecoli_NOTEX_replicate4
b0025	22236	internal	PCB109_PCR12_Ecoli_NOTEX_replicate4
b0025	22262	internal	PCB109_PCR12_Ecoli_NOTEX_replicate4
b0025	22281	internal	PCB109_PCR12_Ecoli_NOTEX_replicate4
b0025	22296	internal	PCB109_PCR12_Ecoli_NOTEX_replicate4
b0025	22443	secondary	PCB109_PCR12_Ecoli_NOTEX_replicate4
b0025	22135	internal	PCB109_PCR12_Ecoli_TEX_replicate4
b0025	22184	internal	PCB109_PCR12_Ecoli_TEX_replicate4
b0026	24567	internal	PCB109_PCR15_Ecoli_NOTEX_replicate4
b0026	24624	internal	PCB109_PCR15_Ecoli_NOTEX_replicate4
b0026	24684	internal	PCB109_PCR15_Ecoli_NOTEX_replicate4
b0026	24712	internal	PCB109_PCR15_Ecoli_NOTEX_replicate4
b0026	24871	internal	PCB109_PCR15_Ecoli_NOTEX_replicate4
b0026	25048	internal	PCB109_PCR15_Ecoli_NOTEX_replicate4
b0026	25192	internal	PCB109_PCR15_Ecoli_NOTEX_replicate4
b0026	25323	secondary	PCB109_PCR15_Ecoli_NOTEX_replicate4
b0026	24628	internal	PCB109_PCR15_Ecoli_NOTEX_replicate5
b0026	24688	internal	PCB109_PCR15_Ecoli_NOTEX_replicate5
b0026	24944	internal	PCB109_PCR15_Ecoli_NOTEX_replicate5
b0026	25328	primary	PCB109_PCR15_Ecoli_NOTEX_replicate5
b0026	24567	internal	PCB109_PCR15_Ecoli_TEX_replicate4
b0026	24684	internal	PCB109_PCR15_Ecoli_TEX_replicate4
b0026	24722	internal	PCB109_PCR15_Ecoli_TEX_replicate4
b0026	24802	internal	PCB109_PCR15_Ecoli_TEX_replicate4
b0026	24871	internal	PCB109_PCR15_Ecoli_TEX_replicate4
b0026	25187	internal	PCB109_PCR15_Ecoli_TEX_replicate4
b0026	25216	secondary	PCB109_PCR15_Ecoli_TEX_replicate4
b0026	25265	secondary	PCB109_PCR15_Ecoli_TEX_replicate4
b0026	25327	secondary	PCB109_PCR15_Ecoli_TEX_replicate4
b0026	24647	internal	PCB109_PCR15_Ecoli_TEX_replicate5
b0026	24668	internal	PCB109_PCR15_Ecoli_TEX_replicate5
b0026	24711	internal	PCB109_PCR15_Ecoli_TEX_replicate5
b0026	24871	internal	PCB109_PCR15_Ecoli_TEX_replicate5
b0026	25187	internal	PCB109_PCR15_Ecoli_TEX_replicate5
b0026	25323	primary	PCB109_PCR15_Ecoli_TEX_replicate5
b0026	22443	internal	PCB109_PCR12_Ecoli_NOTEX_replicate4
b0026	22656	internal	PCB109_PCR12_Ecoli_NOTEX_replicate4
b0026	22849	internal	PCB109_PCR12_Ecoli_NOTEX_replicate4
b0026	24827	internal	PCB109_PCR12_Ecoli_NOTEX_replicate4
b0026	24894	internal	PCB109_PCR12_Ecoli_NOTEX_replicate4
b0026	25001	internal	PCB109_PCR12_Ecoli_NOTEX_replicate4
b0026	25183	internal	PCB109_PCR12_Ecoli_NOTEX_replicate4
b0026	25222	secondary	PCB109_PCR12_Ecoli_NOTEX_replicate4
b0026	25299	secondary	PCB109_PCR12_Ecoli_NOTEX_replicate4
b0026	25323	primary	PCB109_PCR12_Ecoli_NOTEX_replicate4
b0026	24871	internal	PCB109_PCR12_Ecoli_TEX_replicate4
b0026	25323	primary	PCB109_PCR12_Ecoli_TEX_replicate4
b0027	25323	internal	PCB109_PCR15_Ecoli_NOTEX_replicate4
b0027	25688	internal	PCB109_PCR15_Ecoli_NOTEX_replicate4
b0027	25799	secondary	PCB109_PCR15_Ecoli_NOTEX_replicate4
b0027	25328	internal	PCB109_PCR15_Ecoli_NOTEX_replicate5
b0027	25620	internal	PCB109_PCR15_Ecoli_NOTEX_replicate5
b0027	25689	internal	PCB109_PCR15_Ecoli_NOTEX_replicate5
b0027	25797	secondary	PCB109_PCR15_Ecoli_NOTEX_replicate5
b0027	25855	secondary	PCB109_PCR15_Ecoli_NOTEX_replicate5
b0027	25216	internal	PCB109_PCR15_Ecoli_TEX_replicate4
b0027	25265	internal	PCB109_PCR15_Ecoli_TEX_replicate4
b0027	25327	internal	PCB109_PCR15_Ecoli_TEX_replicate4
b0027	25689	internal	PCB109_PCR15_Ecoli_TEX_replicate4
b0027	25323	internal	PCB109_PCR15_Ecoli_TEX_replicate5
b0027	25689	internal	PCB109_PCR15_Ecoli_TEX_replicate5
b0027	25795	secondary	PCB109_PCR15_Ecoli_TEX_replicate5
b0027	25222	internal	PCB109_PCR12_Ecoli_NOTEX_replicate4
b0027	25299	internal	PCB109_PCR12_Ecoli_NOTEX_replicate4
b0027	25323	internal	PCB109_PCR12_Ecoli_NOTEX_replicate4
b0027	25542	internal	PCB109_PCR12_Ecoli_NOTEX_replicate4
b0027	25689	internal	PCB109_PCR12_Ecoli_NOTEX_replicate4
b0027	25795	secondary	PCB109_PCR12_Ecoli_NOTEX_replicate4
b0027	25323	internal	PCB109_PCR12_Ecoli_TEX_replicate4
b0027	25617	internal	PCB109_PCR12_Ecoli_TEX_replicate4
b0027	25689	internal	PCB109_PCR12_Ecoli_TEX_replicate4
b0027	25795	secondary	PCB109_PCR12_Ecoli_TEX_replicate4
b0027	25621	internal	DCS109_Ecoli_NOTEX_replicate2
b0027	25688	internal	DCS109_Ecoli_NOTEX_replicate2
b0028	25855	internal	PCB109_PCR15_Ecoli_NOTEX_replicate5
b0028	26100	internal	PCB109_PCR12_Ecoli_NOTEX_replicate4
b0028	26109	internal	PCB109_PCR12_Ecoli_NOTEX_replicate4
b0029	27280	primary	PCB109_PCR15_Ecoli_NOTEX_replicate5
b0029	27281	primary	PCB109_PCR12_Ecoli_NOTEX_replicate4
b0029	27280	primary	PCB109_PCR12_Ecoli_TEX_replicate4
b0030	28255	primary	PCB109_PCR15_Ecoli_NOTEX_replicate5
b0030	28255	primary	PCB109_PCR12_Ecoli_NOTEX_replicate4
b0030	28488	secondary	PCB109_PCR12_Ecoli_NOTEX_replicate4
b0030	28255	primary	PCB109_PCR12_Ecoli_TEX_replicate4
b0030	28255	primary	DCS109_Ecoli_NOTEX_replicate2
b0030	28255	primary	DCS109_Ecoli_NOTEX_replicate3
b0031	29276	primary	PCB109_PCR15_Ecoli_NOTEX_replicate4
b0031	29276	primary	PCB109_PCR15_Ecoli_NOTEX_replicate5
b0031	29276	primary	PCB109_PCR15_Ecoli_TEX_replicate4
b0031	28488	internal	PCB109_PCR12_Ecoli_NOTEX_replicate4
b0031	29275	primary	PCB109_PCR12_Ecoli_NOTEX_replicate4
b0031	29276	primary	PCB109_PCR12_Ecoli_TEX_replicate4
b0031	29276	primary	DCS109_Ecoli_NOTEX_replicate2
b0031	29276	primary	DCS109_Ecoli_NOTEX_replicate3
b0035	34708	primary	PCB109_PCR15_Ecoli_NOTEX_replicate4
b0035	34714	primary	PCB109_PCR15_Ecoli_NOTEX_replicate5
b0035	34616	secondary	PCB109_PCR15_Ecoli_TEX_replicate4
b0035	34708	primary	PCB109_PCR15_Ecoli_TEX_replicate4
b0035	34715	primary	PCB109_PCR15_Ecoli_TEX_replicate5
b0035	34708	primary	PCB109_PCR12_Ecoli_NOTEX_replicate4
b0035	34718	primary	PCB109_PCR12_Ecoli_NOTEX_replicate4
b0035	34708	primary	PCB109_PCR12_Ecoli_TEX_replicate4
b0049	50324	primary	PCB109_PCR15_Ecoli_NOTEX_replicate4
b0049	50324	primary	PCB109_PCR15_Ecoli_NOTEX_replicate5
b0049	50858	internal	PCB109_PCR15_Ecoli_NOTEX_replicate5
b0049	50324	primary	PCB109_PCR15_Ecoli_TEX_replicate4
b0049	50255	secondary	PCB109_PCR15_Ecoli_TEX_replicate5
b0049	50324	primary	PCB109_PCR15_Ecoli_TEX_replicate5
b0049	50904	internal	PCB109_PCR15_Ecoli_TEX_replicate5
b0049	50324	primary	PCB109_PCR12_Ecoli_NOTEX_replicate4
b0049	51187	internal	PCB109_PCR12_Ecoli_NOTEX_replicate4
b0049	50121	secondary	PCB109_PCR12_Ecoli_TEX_replicate4
b0049	50324	primary	PCB109_PCR12_Ecoli_TEX_replicate4
b0049	50901	internal	PCB109_PCR12_Ecoli_TEX_replicate4
b0049	50323	primary	DCS109_Ecoli_NOTEX_replicate2
b0050	51326	internal	RNA001_Ecoli_TEX_replicate1
b0050	51326	internal	PCB109_PCR15_Ecoli_NOTEX_replicate4
b0050	51376	internal	PCB109_PCR15_Ecoli_NOTEX_replicate4
b0050	51484	internal	PCB109_PCR15_Ecoli_NOTEX_replicate4
b0050	51375	internal	PCB109_PCR15_Ecoli_NOTEX_replicate5
b0050	51484	internal	PCB109_PCR15_Ecoli_NOTEX_replicate5
b0050	51328	internal	PCB109_PCR15_Ecoli_TEX_replicate4
b0050	51375	internal	PCB109_PCR15_Ecoli_TEX_replicate4
b0050	51484	internal	PCB109_PCR15_Ecoli_TEX_replicate4
b0050	51328	internal	PCB109_PCR15_Ecoli_TEX_replicate5
b0050	51375	internal	PCB109_PCR15_Ecoli_TEX_replicate5
b0050	51484	internal	PCB109_PCR15_Ecoli_TEX_replicate5
b0050	51187	secondary	PCB109_PCR12_Ecoli_NOTEX_replicate4
b0050	51328	internal	PCB109_PCR12_Ecoli_NOTEX_replicate4
b0050	51375	internal	PCB109_PCR12_Ecoli_NOTEX_replicate4
b0050	51484	internal	PCB109_PCR12_Ecoli_NOTEX_replicate4
b0050	51328	internal	PCB109_PCR12_Ecoli_TEX_replicate4
b0050	51375	internal	PCB109_PCR12_Ecoli_TEX_replicate4
b0050	51484	internal	PCB109_PCR12_Ecoli_TEX_replicate4
b0050	51530	internal	PCB109_PCR12_Ecoli_TEX_replicate4
b0050	51375	internal	DCS109_Ecoli_NOTEX_replicate2
b0050	51327	internal	DCS109_Ecoli_NOTEX_replicate3
b0050	51375	internal	DCS109_Ecoli_NOTEX_replicate3
b0051	51326	primary	RNA001_Ecoli_TEX_replicate1
b0051	51326	secondary	PCB109_PCR15_Ecoli_NOTEX_replicate4
b0051	51376	primary	PCB109_PCR15_Ecoli_NOTEX_replicate4
b0051	51484	secondary	PCB109_PCR15_Ecoli_NOTEX_replicate4
b0051	52342	internal	PCB109_PCR15_Ecoli_NOTEX_replicate4
b0051	52377	internal	PCB109_PCR15_Ecoli_NOTEX_replicate4
b0051	51375	primary	PCB109_PCR15_Ecoli_NOTEX_replicate5
b0051	51484	secondary	PCB109_PCR15_Ecoli_NOTEX_replicate5
b0051	51328	secondary	PCB109_PCR15_Ecoli_TEX_replicate4
b0051	51375	primary	PCB109_PCR15_Ecoli_TEX_replicate4
b0051	51484	secondary	PCB109_PCR15_Ecoli_TEX_replicate4
b0051	51328	secondary	PCB109_PCR15_Ecoli_TEX_replicate5
b0051	51375	primary	PCB109_PCR15_Ecoli_TEX_replicate5
b0051	51484	secondary	PCB109_PCR15_Ecoli_TEX_replicate5
b0051	51927	internal	PCB109_PCR15_Ecoli_TEX_replicate5
b0051	51328	secondary	PCB109_PCR12_Ecoli_NOTEX_replicate4
b0051	51375	primary	PCB109_PCR12_Ecoli_NOTEX_replicate4
b0051	51484	secondary	PCB109_PCR12_Ecoli_NOTEX_replicate4
b0051	51328	secondary	PCB109_PCR12_Ecoli_TEX_replicate4
b0051	51375	primary	PCB109_PCR12_Ecoli_TEX_replicate4
b0051	51484	secondary	PCB109_PCR12_Ecoli_TEX_replicate4
b0051	51530	secondary	PCB109_PCR12_Ecoli_TEX_replicate4
b0051	51625	internal	PCB109_PCR12_Ecoli_TEX_replicate4
b0051	51675	internal	PCB109_PCR12_Ecoli_TEX_replicate4
b0051	51375	primary	DCS109_Ecoli_NOTEX_replicate2
b0051	51327	secondary	DCS109_Ecoli_NOTEX_replicate3
b0051	51375	primary	DCS109_Ecoli_NOTEX_replicate3
b0052	53259	internal	RNA001_Ecoli_TEX_replicate1
b0052	52342	secondary	PCB109_PCR15_Ecoli_NOTEX_replicate4
b0052	52377	secondary	PCB109_PCR15_Ecoli_NOTEX_replicate4
b0052	53260	internal	PCB109_PCR15_Ecoli_NOTEX_replicate4
b0052	53260	internal	PCB109_PCR15_Ecoli_NOTEX_replicate5
b0052	53260	internal	PCB109_PCR15_Ecoli_TEX_replicate4
b0052	53285	internal	PCB109_PCR15_Ecoli_TEX_replicate4
b0052	52451	internal	PCB109_PCR15_Ecoli_TEX_replicate5
b0052	53260	internal	PCB109_PCR12_Ecoli_NOTEX_replicate4
b0052	53363	internal	PCB109_PCR12_Ecoli_NOTEX_replicate4
b0052	53262	internal	PCB109_PCR12_Ecoli_TEX_replicate4
b0052	53259	internal	DCS109_Ecoli_NOTEX_replicate2
b0052	53260	internal	DCS109_Ecoli_NOTEX_replicate3
b0052	53363	internal	DCS109_Ecoli_NOTEX_replicate3
b0053	53259	primary	RNA001_Ecoli_TEX_replicate1
b0053	53260	primary	PCB109_PCR15_Ecoli_NOTEX_replicate4
b0053	54365	internal	PCB109_PCR15_Ecoli_NOTEX_replicate4
b0053	53260	primary	PCB109_PCR15_Ecoli_NOTEX_replicate5
b0053	53260	secondary	PCB109_PCR15_Ecoli_TEX_replicate4
b0053	53285	secondary	PCB109_PCR15_Ecoli_TEX_replicate4
b0053	54366	internal	PCB109_PCR15_Ecoli_TEX_replicate4
b0053	53260	primary	PCB109_PCR12_Ecoli_NOTEX_replicate4
b0053	53363	secondary	PCB109_PCR12_Ecoli_NOTEX_replicate4
b0053	53629	internal	PCB109_PCR12_Ecoli_NOTEX_replicate4
b0053	54365	internal	PCB109_PCR12_Ecoli_NOTEX_replicate4
b0053	53262	primary	PCB109_PCR12_Ecoli_TEX_replicate4
b0053	53259	primary	DCS109_Ecoli_NOTEX_replicate2
b0053	53260	primary	DCS109_Ecoli_NOTEX_replicate3
b0053	53363	secondary	DCS109_Ecoli_NOTEX_replicate3
b0055	58377	primary	PCB109_PCR15_Ecoli_NOTEX_replicate5
b0055	58242	primary	PCB109_PCR15_Ecoli_TEX_replicate5
b0055	58241	primary	PCB109_PCR12_Ecoli_NOTEX_replicate4
b0055	58377	primary	PCB109_PCR12_Ecoli_TEX_replicate4
b0056	58986	internal	PCB109_PCR15_Ecoli_NOTEX_replicate4
b0056	58986	internal	PCB109_PCR12_Ecoli_NOTEX_replicate4
b0058	59614	primary	PCB109_PCR15_Ecoli_NOTEX_replicate5
b0058	59614	primary	PCB109_PCR15_Ecoli_TEX_replicate5
b0058	59614	primary	PCB109_PCR12_Ecoli_NOTEX_replicate4
b0058	60030	internal	PCB109_PCR12_Ecoli_NOTEX_replicate4
b0058	59615	primary	PCB109_PCR12_Ecoli_TEX_replicate4
b0058	60030	internal	PCB109_PCR12_Ecoli_TEX_replicate4
b0059	60854	internal	PCB109_PCR15_Ecoli_NOTEX_replicate4
b0059	60854	internal	PCB109_PCR15_Ecoli_NOTEX_replicate5
b0059	60854	internal	PCB109_PCR15_Ecoli_TEX_replicate4
b0059	60854	internal	PCB109_PCR12_Ecoli_NOTEX_replicate4
b0059	60854	internal	PCB109_PCR12_Ecoli_TEX_replicate4
b0059	60854	internal	DCS109_Ecoli_NOTEX_replicate2
b0060	63300	primary	PCB109_PCR15_Ecoli_NOTEX_replicate4
b0060	63298	primary	PCB109_PCR15_Ecoli_NOTEX_replicate5
b0060	63299	primary	PCB109_PCR15_Ecoli_TEX_replicate4
b0060	63350	secondary	PCB109_PCR15_Ecoli_TEX_replicate4
b0060	63298	primary	PCB109_PCR15_Ecoli_TEX_replicate5
b0060	63352	secondary	PCB109_PCR15_Ecoli_TEX_replicate5
b0060	63298	primary	PCB109_PCR12_Ecoli_NOTEX_replicate4
b0060	63298	primary	PCB109_PCR12_Ecoli_TEX_replicate4
b0060	63352	secondary	PCB109_PCR12_Ecoli_TEX_replicate4
b0060	63298	primary	DCS109_Ecoli_NOTEX_replicate3
b0064	71565	primary	PCB109_PCR15_Ecoli_NOTEX_replicate4
b0064	71566	primary	PCB109_PCR15_Ecoli_NOTEX_replicate5
b0065	71565	internal	PCB109_PCR15_Ecoli_NOTEX_replicate4
b0065	71593	internal	PCB109_PCR15_Ecoli_NOTEX_replicate4
b0065	71623	internal	PCB109_PCR15_Ecoli_NOTEX_replicate4
b0065	71700	internal	PCB109_PCR15_Ecoli_NOTEX_replicate4
b0065	71750	internal	PCB109_PCR15_Ecoli_NOTEX_replicate4
b0065	71801	internal	PCB109_PCR15_Ecoli_NOTEX_replicate4
b0065	71566	internal	PCB109_PCR15_Ecoli_NOTEX_replicate5
b0065	71626	internal	PCB109_PCR15_Ecoli_NOTEX_replicate5
b0065	71691	internal	PCB109_PCR15_Ecoli_NOTEX_replicate5
b0065	71626	internal	PCB109_PCR15_Ecoli_TEX_replicate4
b0065	71685	internal	PCB109_PCR15_Ecoli_TEX_replicate4
b0065	71626	internal	PCB109_PCR15_Ecoli_TEX_replicate5
b0065	71686	internal	PCB109_PCR15_Ecoli_TEX_replicate5
b0065	71626	internal	PCB109_PCR12_Ecoli_NOTEX_replicate4
b0065	71800	internal	PCB109_PCR12_Ecoli_NOTEX_replicate4
b0065	72050	internal	PCB109_PCR12_Ecoli_NOTEX_replicate4
b0065	72170	secondary	PCB109_PCR12_Ecoli_NOTEX_replicate4
b0065	71626	internal	PCB109_PCR12_Ecoli_TEX_replicate4
b0065	72171	secondary	PCB109_PCR12_Ecoli_TEX_replicate4
b0067	74239	internal	PCB109_PCR12_Ecoli_NOTEX_replicate4
b0067	74118	internal	PCB109_PCR12_Ecoli_TEX_replicate4
b0067	74266	internal	PCB109_PCR12_Ecoli_TEX_replicate4
b0067	74307	internal	PCB109_PCR12_Ecoli_TEX_replicate4
b0067	74359	internal	PCB109_PCR12_Ecoli_TEX_replicate4
b0067	74496	internal	PCB109_PCR12_Ecoli_TEX_replicate4
b0068	74869	internal	PCB109_PCR15_Ecoli_NOTEX_replicate4
b0068	74239	primary	PCB109_PCR12_Ecoli_NOTEX_replicate4
b0068	74266	secondary	PCB109_PCR12_Ecoli_TEX_replicate4
b0068	74307	secondary	PCB109_PCR12_Ecoli_TEX_replicate4
b0068	74359	primary	PCB109_PCR12_Ecoli_TEX_replicate4
b0068	74496	secondary	PCB109_PCR12_Ecoli_TEX_replicate4
b0068	75016	internal	PCB109_PCR12_Ecoli_TEX_replicate4
b0069	75517	primary	PCB109_PCR15_Ecoli_NOTEX_replicate4
b0069	75516	primary	PCB109_PCR15_Ecoli_NOTEX_replicate5
b0069	75517	primary	PCB109_PCR15_Ecoli_TEX_replicate4
b0069	75517	primary	PCB109_PCR15_Ecoli_TEX_replicate5
b0069	75517	primary	PCB109_PCR12_Ecoli_NOTEX_replicate4
b0069	75516	primary	PCB109_PCR12_Ecoli_TEX_replicate4
b0069	75517	primary	DCS109_Ecoli_NOTEX_replicate2
b0069	75519	primary	DCS109_Ecoli_NOTEX_replicate3
b0070	77944	internal	PCB109_PCR15_Ecoli_NOTEX_replicate4
b0070	77935	internal	PCB109_PCR15_Ecoli_NOTEX_replicate5
b0070	78073	internal	PCB109_PCR15_Ecoli_NOTEX_replicate5
b0070	78175	internal	PCB109_PCR15_Ecoli_NOTEX_replicate5
b0070	77945	internal	PCB109_PCR12_Ecoli_TEX_replicate4
b0071	78816	primary	PCB109_PCR15_Ecoli_NOTEX_replicate4
b0071	78816	primary	PCB109_PCR15_Ecoli_NOTEX_replicate5
b0071	78817	primary	PCB109_PCR15_Ecoli_TEX_replicate4
b0071	78817	primary	PCB109_PCR15_Ecoli_TEX_replicate5
b0071	78816	primary	PCB109_PCR12_Ecoli_NOTEX_replicate4
b0071	78817	primary	PCB109_PCR12_Ecoli_TEX_replicate4
b0071	78815	primary	DCS109_Ecoli_NOTEX_replicate2
b0080	88427	internal	PCB109_PCR15_Ecoli_NOTEX_replicate4
b0080	89079	primary	PCB109_PCR15_Ecoli_NOTEX_replicate4
b0080	89080	primary	PCB109_PCR15_Ecoli_TEX_replicate4
b0080	88550	internal	PCB109_PCR12_Ecoli_NOTEX_replicate4
b0080	89077	primary	PCB109_PCR12_Ecoli_NOTEX_replicate4
b0080	89081	primary	PCB109_PCR12_Ecoli_TEX_replicate4
b0080	89079	primary	DCS109_Ecoli_NOTEX_replicate2
b0080	89079	primary	DCS109_Ecoli_NOTEX_replicate3
b0081	89780	internal	RNA001_Ecoli_TEX_replicate1
b0081	89763	internal	PCB109_PCR15_Ecoli_NOTEX_replicate4
b0081	89929	internal	PCB109_PCR15_Ecoli_NOTEX_replicate4
b0081	89693	internal	PCB109_PCR15_Ecoli_NOTEX_replicate5
b0081	89780	internal	PCB109_PCR15_Ecoli_NOTEX_replicate5
b0081	90033	internal	PCB109_PCR15_Ecoli_NOTEX_replicate5
b0081	90102	secondary	PCB109_PCR15_Ecoli_NOTEX_replicate5
b0081	90208	secondary	PCB109_PCR15_Ecoli_NOTEX_replicate5
b0081	89730	internal	PCB109_PCR15_Ecoli_TEX_replicate4
b0081	89780	internal	PCB109_PCR15_Ecoli_TEX_replicate4
b0081	89700	internal	PCB109_PCR15_Ecoli_TEX_replicate5
b0081	89741	internal	PCB109_PCR15_Ecoli_TEX_replicate5
b0081	89763	internal	PCB109_PCR15_Ecoli_TEX_replicate5
b0081	89997	internal	PCB109_PCR15_Ecoli_TEX_replicate5
b0081	90033	internal	PCB109_PCR15_Ecoli_TEX_replicate5
b0081	90100	secondary	PCB109_PCR15_Ecoli_TEX_replicate5
b0081	89780	internal	PCB109_PCR12_Ecoli_NOTEX_replicate4
b0081	90035	internal	PCB109_PCR12_Ecoli_NOTEX_replicate4
b0081	90089	primary	PCB109_PCR12_Ecoli_NOTEX_replicate4
b0081	90208	secondary	PCB109_PCR12_Ecoli_NOTEX_replicate4
b0081	90251	secondary	PCB109_PCR12_Ecoli_NOTEX_replicate4
b0081	89785	internal	PCB109_PCR12_Ecoli_TEX_replicate4
b0081	89946	internal	PCB109_PCR12_Ecoli_TEX_replicate4
b0081	89997	internal	PCB109_PCR12_Ecoli_TEX_replicate4
b0081	90090	internal	PCB109_PCR12_Ecoli_TEX_replicate4
b0081	90206	secondary	PCB109_PCR12_Ecoli_TEX_replicate4
b0081	90276	secondary	PCB109_PCR12_Ecoli_TEX_replicate4
b0081	89780	internal	DCS109_Ecoli_NOTEX_replicate2
b0081	90280	primary	DCS109_Ecoli_NOTEX_replicate3
b0082	90672	internal	PCB109_PCR15_Ecoli_NOTEX_replicate4
b0082	90735	internal	PCB109_PCR15_Ecoli_NOTEX_replicate4
b0082	90807	internal	PCB109_PCR15_Ecoli_NOTEX_replicate4
b0082	90896	internal	PCB109_PCR15_Ecoli_NOTEX_replicate4
b0082	91162	secondary	PCB109_PCR15_Ecoli_NOTEX_replicate4
b0082	90102	internal	PCB109_PCR15_Ecoli_NOTEX_replicate5
b0082	90208	internal	PCB109_PCR15_Ecoli_NOTEX_replicate5
b0082	90657	internal	PCB109_PCR15_Ecoli_NOTEX_replicate5
b0082	90734	internal	PCB109_PCR15_Ecoli_NOTEX_replicate5
b0082	90935	internal	PCB109_PCR15_Ecoli_NOTEX_replicate5
b0082	90672	internal	PCB109_PCR15_Ecoli_TEX_replicate4
b0082	90725	internal	PCB109_PCR15_Ecoli_TEX_replicate4
b0082	91136	secondary	PCB109_PCR15_Ecoli_TEX_replicate4
b0082	91163	primary	PCB109_PCR15_Ecoli_TEX_replicate4
b0082	90100	internal	PCB109_PCR15_Ecoli_TEX_replicate5
b0082	90672	internal	PCB109_PCR15_Ecoli_TEX_replicate5
b0082	90735	internal	PCB109_PCR15_Ecoli_TEX_replicate5
b0082	90894	internal	PCB109_PCR15_Ecoli_TEX_replicate5
b0082	91102	secondary	PCB109_PCR15_Ecoli_TEX_replicate5
b0082	91164	secondary	PCB109_PCR15_Ecoli_TEX_replicate5
b0082	90208	internal	PCB109_PCR12_Ecoli_NOTEX_replicate4
b0082	90251	internal	PCB109_PCR12_Ecoli_NOTEX_replicate4
b0082	90572	internal	PCB109_PCR12_Ecoli_NOTEX_replicate4
b0082	90657	internal	PCB109_PCR12_Ecoli_NOTEX_replicate4
b0082	90726	internal	PCB109_PCR12_Ecoli_NOTEX_replicate4
b0082	90937	internal	PCB109_PCR12_Ecoli_NOTEX_replicate4
b0082	91031	internal	PCB109_PCR12_Ecoli_NOTEX_replicate4
b0082	91067	secondary	PCB109_PCR12_Ecoli_NOTEX_replicate4
b0082	91160	primary	PCB109_PCR12_Ecoli_NOTEX_replicate4
b0082	91206	secondary	PCB109_PCR12_Ecoli_NOTEX_replicate4
b0082	90206	internal	PCB109_PCR12_Ecoli_TEX_replicate4
b0082	90276	internal	PCB109_PCR12_Ecoli_TEX_replicate4
b0082	90573	internal	PCB109_PCR12_Ecoli_TEX_replicate4
b0082	90657	internal	PCB109_PCR12_Ecoli_TEX_replicate4
b0082	90730	internal	PCB109_PCR12_Ecoli_TEX_replicate4
b0082	90735	internal	PCB109_PCR12_Ecoli_TEX_replicate4
b0082	90832	internal	PCB109_PCR12_Ecoli_TEX_replicate4
b0082	90990	internal	PCB109_PCR12_Ecoli_TEX_replicate4
b0082	91159	secondary	PCB109_PCR12_Ecoli_TEX_replicate4
b0082	91207	secondary	PCB109_PCR12_Ecoli_TEX_replicate4
b0082	91261	secondary	PCB109_PCR12_Ecoli_TEX_replicate4
b0082	90571	internal	DCS109_Ecoli_NOTEX_replicate2
b0082	91163	primary	DCS109_Ecoli_NOTEX_replicate2
b0082	90280	internal	DCS109_Ecoli_NOTEX_replicate3
b0082	90734	internal	DCS109_Ecoli_NOTEX_replicate3
b0083	91162	internal	PCB109_PCR15_Ecoli_NOTEX_replicate4
b0083	91136	internal	PCB109_PCR15_Ecoli_TEX_replicate4
b0083	91163	internal	PCB109_PCR15_Ecoli_TEX_replicate4
b0083	91484	secondary	PCB109_PCR15_Ecoli_TEX_replicate4
b0083	91102	internal	PCB109_PCR15_Ecoli_TEX_replicate5
b0083	91164	internal	PCB109_PCR15_Ecoli_TEX_replicate5
b0083	91067	internal	PCB109_PCR12_Ecoli_NOTEX_replicate4
b0083	91160	internal	PCB109_PCR12_Ecoli_NOTEX_replicate4
b0083	91206	internal	PCB109_PCR12_Ecoli_NOTEX_replicate4
b0083	91389	internal	PCB109_PCR12_Ecoli_NOTEX_replicate4
b0083	91159	internal	PCB109_PCR12_Ecoli_TEX_replicate4
b0083	91207	internal	PCB109_PCR12_Ecoli_TEX_replicate4
b0083	91261	internal	PCB109_PCR12_Ecoli_TEX_replicate4
b0083	91389	internal	PCB109_PCR12_Ecoli_TEX_replicate4
b0083	91486	primary	PCB109_PCR12_Ecoli_TEX_replicate4
b0083	91163	internal	DCS109_Ecoli_NOTEX_replicate2
b0084	91983	internal	PCB109_PCR15_Ecoli_NOTEX_replicate4
b0084	92037	internal	PCB109_PCR15_Ecoli_NOTEX_replicate4
b0084	92118	internal	PCB109_PCR15_Ecoli_NOTEX_replicate4
b0084	92150	internal	PCB109_PCR15_Ecoli_NOTEX_replicate4
b0084	92213	internal	PCB109_PCR15_Ecoli_NOTEX_replicate4
b0084	92230	internal	PCB109_PCR15_Ecoli_NOTEX_replicate4
b0084	92244	internal	PCB109_PCR15_Ecoli_NOTEX_replicate4
b0084	92302	internal	PCB109_PCR15_Ecoli_NOTEX_replicate4
b0084	92365	internal	PCB109_PCR15_Ecoli_NOTEX_replicate4
b0084	92416	internal	PCB109_PCR15_Ecoli_NOTEX_replicate4
b0084	92619	internal	PCB109_PCR15_Ecoli_NOTEX_replicate4
b0084	92658	internal	PCB109_PCR15_Ecoli_NOTEX_replicate4
b0084	93126	internal	PCB109_PCR15_Ecoli_NOTEX_replicate4
b0084	93282	secondary	PCB109_PCR15_Ecoli_NOTEX_replicate4
b0084	92035	internal	PCB109_PCR15_Ecoli_NOTEX_replicate5
b0084	92172	internal	PCB109_PCR15_Ecoli_NOTEX_replicate5
b0084	91484	internal	PCB109_PCR15_Ecoli_TEX_replicate4
b0084	92038	internal	PCB109_PCR15_Ecoli_TEX_replicate4
b0084	92119	internal	PCB109_PCR15_Ecoli_TEX_replicate4
b0084	92177	internal	PCB109_PCR15_Ecoli_TEX_replicate4
b0084	92213	internal	PCB109_PCR15_Ecoli_TEX_replicate4
b0084	92382	internal	PCB109_PCR15_Ecoli_TEX_replicate4
b0084	92619	internal	PCB109_PCR15_Ecoli_TEX_replicate4
b0084	92658	internal	PCB109_PCR15_Ecoli_TEX_replicate4
b0084	93126	internal	PCB109_PCR15_Ecoli_TEX_replicate4
b0084	92070	internal	PCB109_PCR15_Ecoli_TEX_replicate5
b0084	92036	internal	PCB109_PCR12_Ecoli_NOTEX_replicate4
b0084	92145	internal	PCB109_PCR12_Ecoli_NOTEX_replicate4
b0084	92199	internal	PCB109_PCR12_Ecoli_NOTEX_replicate4
b0084	92302	internal	PCB109_PCR12_Ecoli_NOTEX_replicate4
b0084	92527	internal	PCB109_PCR12_Ecoli_NOTEX_replicate4
b0084	92618	internal	PCB109_PCR12_Ecoli_NOTEX_replicate4
b0084	92658	internal	PCB109_PCR12_Ecoli_NOTEX_replicate4
b0084	91486	internal	PCB109_PCR12_Ecoli_TEX_replicate4
b0084	92119	internal	PCB109_PCR12_Ecoli_TEX_replicate4
b0084	92511	internal	PCB109_PCR12_Ecoli_TEX_replicate4
b0084	92658	internal	DCS109_Ecoli_NOTEX_replicate2
b0084	93128	internal	DCS109_Ecoli_NOTEX_replicate2
b0084	92619	internal	DCS109_Ecoli_NOTEX_replicate3
b0084	92658	internal	DCS109_Ecoli_NOTEX_replicate3
b0085	93282	internal	PCB109_PCR15_Ecoli_NOTEX_replicate4
b0085	93491	internal	PCB109_PCR15_Ecoli_NOTEX_replicate4
b0085	93754	internal	PCB109_PCR15_Ecoli_NOTEX_replicate4
b0085	94771	primary	PCB109_PCR15_Ecoli_NOTEX_replicate4
b0085	94845	primary	PCB109_PCR15_Ecoli_NOTEX_replicate4
b0085	94903	secondary	PCB109_PCR15_Ecoli_NOTEX_replicate4
b0085	94944	secondary	PCB109_PCR15_Ecoli_NOTEX_replicate4
b0085	94954	secondary	PCB109_PCR15_Ecoli_NOTEX_replicate4
b0085	93867	internal	PCB109_PCR15_Ecoli_TEX_replicate4
b0085	94796	primary	PCB109_PCR15_Ecoli_TEX_replicate4
b0085	94829	primary	PCB109_PCR15_Ecoli_TEX_replicate4
b0085	94868	primary	PCB109_PCR15_Ecoli_TEX_replicate4
b0085	94881	primary	PCB109_PCR15_Ecoli_TEX_replicate4
b0085	94899	primary	PCB109_PCR15_Ecoli_TEX_replicate4
b0085	93756	internal	PCB109_PCR12_Ecoli_NOTEX_replicate4
b0085	93777	internal	PCB109_PCR12_Ecoli_NOTEX_replicate4
b0085	94736	primary	PCB109_PCR12_Ecoli_TEX_replicate4
b0086	94771	internal	PCB109_PCR15_Ecoli_NOTEX_replicate4
b0086	94845	internal	PCB109_PCR15_Ecoli_NOTEX_replicate4
b0086	94903	internal	PCB109_PCR15_Ecoli_NOTEX_replicate4
b0086	94944	internal	PCB109_PCR15_Ecoli_NOTEX_replicate4
b0086	94954	internal	PCB109_PCR15_Ecoli_NOTEX_replicate4
b0086	95014	internal	PCB109_PCR15_Ecoli_NOTEX_replicate4
b0086	95088	internal	PCB109_PCR15_Ecoli_NOTEX_replicate4
b0086	95185	internal	PCB109_PCR15_Ecoli_NOTEX_replicate4
b0086	95614	internal	PCB109_PCR15_Ecoli_NOTEX_replicate4
b0086	95632	internal	PCB109_PCR15_Ecoli_NOTEX_replicate4
b0086	95714	internal	PCB109_PCR15_Ecoli_NOTEX_replicate4
b0086	95807	internal	PCB109_PCR15_Ecoli_NOTEX_replicate4
b0086	95638	internal	PCB109_PCR15_Ecoli_NOTEX_replicate5
b0086	95688	internal	PCB109_PCR15_Ecoli_NOTEX_replicate5
b0086	94796	internal	PCB109_PCR15_Ecoli_TEX_replicate4
b0086	94829	internal	PCB109_PCR15_Ecoli_TEX_replicate4
b0086	94868	internal	PCB109_PCR15_Ecoli_TEX_replicate4
b0086	94881	internal	PCB109_PCR15_Ecoli_TEX_replicate4
b0086	94899	internal	PCB109_PCR15_Ecoli_TEX_replicate4
b0086	94988	internal	PCB109_PCR15_Ecoli_TEX_replicate4
b0086	95110	internal	PCB109_PCR15_Ecoli_TEX_replicate4
b0086	95665	internal	PCB109_PCR15_Ecoli_TEX_replicate4
b0086	95826	internal	PCB109_PCR15_Ecoli_TEX_replicate4
b0086	95817	internal	PCB109_PCR15_Ecoli_TEX_replicate5
b0086	95087	internal	PCB109_PCR12_Ecoli_NOTEX_replicate4
b0086	95172	internal	PCB109_PCR12_Ecoli_NOTEX_replicate4
b0086	95211	internal	PCB109_PCR12_Ecoli_NOTEX_replicate4
b0086	95363	internal	PCB109_PCR12_Ecoli_NOTEX_replicate4
b0086	95407	internal	PCB109_PCR12_Ecoli_NOTEX_replicate4
b0086	95639	internal	PCB109_PCR12_Ecoli_NOTEX_replicate4
b0086	95900	internal	PCB109_PCR12_Ecoli_NOTEX_replicate4
b0086	94736	internal	PCB109_PCR12_Ecoli_TEX_replicate4
b0086	96234	primary	PCB109_PCR12_Ecoli_TEX_replicate4
b0087	96686	internal	PCB109_PCR15_Ecoli_TEX_replicate4
b0087	96234	internal	PCB109_PCR12_Ecoli_TEX_replicate4
b0087	96588	internal	DCS109_Ecoli_NOTEX_replicate2
b0087	96588	internal	DCS109_Ecoli_NOTEX_replicate3
b0088	98473	primary	PCB109_PCR15_Ecoli_NOTEX_replicate4
b0089	98473	internal	PCB109_PCR15_Ecoli_NOTEX_replicate4
b0089	99889	primary	PCB109_PCR12_Ecoli_NOTEX_replicate4
b0089	99909	primary	PCB109_PCR12_Ecoli_TEX_replicate4
b0089	99718	primary	DCS109_Ecoli_NOTEX_replicate2
b0090	100049	internal	PCB109_PCR15_Ecoli_TEX_replicate4
b0090	99889	internal	PCB109_PCR12_Ecoli_NOTEX_replicate4
b0090	99909	internal	PCB109_PCR12_Ecoli_TEX_replicate4
b0090	99718	internal	DCS109_Ecoli_NOTEX_replicate2
b0092	103446	primary	PCB109_PCR15_Ecoli_TEX_replicate4
b0092	103072	internal	PCB109_PCR12_Ecoli_TEX_replicate4
b0093	103446	internal	PCB109_PCR15_Ecoli_TEX_replicate4
b0093	103496	internal	PCB109_PCR15_Ecoli_TEX_replicate5
b0094	105171	internal	PCB109_PCR15_Ecoli_NOTEX_replicate4
b0094	105231	internal	PCB109_PCR15_Ecoli_NOTEX_replicate4
b0094	105173	internal	PCB109_PCR15_Ecoli_NOTEX_replicate5
b0094	105231	internal	PCB109_PCR15_Ecoli_NOTEX_replicate5
b0094	105075	internal	PCB109_PCR15_Ecoli_TEX_replicate4
b0094	105230	internal	PCB109_PCR15_Ecoli_TEX_replicate4
b0094	104829	internal	PCB109_PCR15_Ecoli_TEX_replicate5
b0094	105074	internal	PCB109_PCR15_Ecoli_TEX_replicate5
b0094	105172	internal	PCB109_PCR15_Ecoli_TEX_replicate5
b0094	105231	internal	PCB109_PCR15_Ecoli_TEX_replicate5
b0094	104337	internal	PCB109_PCR12_Ecoli_NOTEX_replicate4
b0094	105170	internal	PCB109_PCR12_Ecoli_NOTEX_replicate4
b0094	105231	internal	PCB109_PCR12_Ecoli_NOTEX_replicate4
b0094	105171	internal	PCB109_PCR12_Ecoli_TEX_replicate4
b0094	105230	internal	PCB109_PCR12_Ecoli_TEX_replicate4
b0094	105172	internal	DCS109_Ecoli_NOTEX_replicate2
b0094	105231	internal	DCS109_Ecoli_NOTEX_replicate2
b0094	105171	internal	DCS109_Ecoli_NOTEX_replicate3
b0094	105231	internal	DCS109_Ecoli_NOTEX_replicate3
b0094	105278	secondary	DCS109_Ecoli_NOTEX_replicate3
b0095	106673	primary	RNA001_Ecoli_TEX_replicate1
b0095	106673	primary	PCB109_PCR15_Ecoli_NOTEX_replicate4
b0095	106749	secondary	PCB109_PCR15_Ecoli_NOTEX_replicate4
b0095	106673	primary	PCB109_PCR15_Ecoli_NOTEX_replicate5
b0095	106641	secondary	PCB109_PCR15_Ecoli_TEX_replicate4
b0095	106673	primary	PCB109_PCR15_Ecoli_TEX_replicate4
b0095	106673	primary	PCB109_PCR15_Ecoli_TEX_replicate5
b0095	106157	internal	PCB109_PCR12_Ecoli_NOTEX_replicate4
b0095	106673	primary	PCB109_PCR12_Ecoli_NOTEX_replicate4
b0095	106722	secondary	PCB109_PCR12_Ecoli_NOTEX_replicate4
b0095	105562	internal	PCB109_PCR12_Ecoli_TEX_replicate4
b0095	106673	primary	PCB109_PCR12_Ecoli_TEX_replicate4
b0095	106725	primary	PCB109_PCR12_Ecoli_TEX_replicate4
b0095	106673	primary	DCS109_Ecoli_NOTEX_replicate2
b0095	106673	primary	DCS109_Ecoli_NOTEX_replicate3
b0096	106673	internal	RNA001_Ecoli_TEX_replicate1
b0096	106849	internal	RNA001_Ecoli_TEX_replicate1
b0096	107238	internal	RNA001_Ecoli_TEX_replicate1
b0096	107549	primary	RNA001_Ecoli_TEX_replicate1
b0096	106673	internal	PCB109_PCR15_Ecoli_NOTEX_replicate4
b0096	106749	internal	PCB109_PCR15_Ecoli_NOTEX_replicate4
b0096	106771	internal	PCB109_PCR15_Ecoli_NOTEX_replicate4
b0096	106822	internal	PCB109_PCR15_Ecoli_NOTEX_replicate4
b0096	106865	internal	PCB109_PCR15_Ecoli_NOTEX_replicate4
b0096	106934	internal	PCB109_PCR15_Ecoli_NOTEX_replicate4
b0096	107003	internal	PCB109_PCR15_Ecoli_NOTEX_replicate4
b0096	107549	secondary	PCB109_PCR15_Ecoli_NOTEX_replicate4
b0096	106673	internal	PCB109_PCR15_Ecoli_NOTEX_replicate5
b0096	106817	internal	PCB109_PCR15_Ecoli_NOTEX_replicate5
b0096	106867	internal	PCB109_PCR15_Ecoli_NOTEX_replicate5
b0096	106934	internal	PCB109_PCR15_Ecoli_NOTEX_replicate5
b0096	107551	primary	PCB109_PCR15_Ecoli_NOTEX_replicate5
b0096	106641	internal	PCB109_PCR15_Ecoli_TEX_replicate4
b0096	106673	internal	PCB109_PCR15_Ecoli_TEX_replicate4
b0096	106773	internal	PCB109_PCR15_Ecoli_TEX_replicate4
b0096	106816	internal	PCB109_PCR15_Ecoli_TEX_replicate4
b0096	106931	internal	PCB109_PCR15_Ecoli_TEX_replicate4
b0096	107073	internal	PCB109_PCR15_Ecoli_TEX_replicate4
b0096	107551	primary	PCB109_PCR15_Ecoli_TEX_replicate4
b0096	106673	internal	PCB109_PCR15_Ecoli_TEX_replicate5
b0096	106822	internal	PCB109_PCR15_Ecoli_TEX_replicate5
b0096	106934	internal	PCB109_PCR15_Ecoli_TEX_replicate5
b0096	107093	internal	PCB109_PCR15_Ecoli_TEX_replicate5
b0096	107106	internal	PCB109_PCR15_Ecoli_TEX_replicate5
b0096	107551	primary	PCB109_PCR15_Ecoli_TEX_replicate5
b0096	106673	internal	PCB109_PCR12_Ecoli_NOTEX_replicate4
b0096	106722	internal	PCB109_PCR12_Ecoli_NOTEX_replicate4
b0096	106770	internal	PCB109_PCR12_Ecoli_NOTEX_replicate4
b0096	106814	internal	PCB109_PCR12_Ecoli_NOTEX_replicate4
b0096	106859	internal	PCB109_PCR12_Ecoli_NOTEX_replicate4
b0096	106889	internal	PCB109_PCR12_Ecoli_NOTEX_replicate4
b0096	106934	internal	PCB109_PCR12_Ecoli_NOTEX_replicate4
b0096	107077	internal	PCB109_PCR12_Ecoli_NOTEX_replicate4
b0096	107120	internal	PCB109_PCR12_Ecoli_NOTEX_replicate4
b0096	107196	internal	PCB109_PCR12_Ecoli_NOTEX_replicate4
b0096	107242	internal	PCB109_PCR12_Ecoli_NOTEX_replicate4
b0096	107298	internal	PCB109_PCR12_Ecoli_NOTEX_replicate4
b0096	107360	internal	PCB109_PCR12_Ecoli_NOTEX_replicate4
b0096	107387	internal	PCB109_PCR12_Ecoli_NOTEX_replicate4
b0096	107406	internal	PCB109_PCR12_Ecoli_NOTEX_replicate4
b0096	107492	secondary	PCB109_PCR12_Ecoli_NOTEX_replicate4
b0096	107549	primary	PCB109_PCR12_Ecoli_NOTEX_replicate4
b0096	106673	internal	PCB109_PCR12_Ecoli_TEX_replicate4
b0096	106725	internal	PCB109_PCR12_Ecoli_TEX_replicate4
b0096	106816	internal	PCB109_PCR12_Ecoli_TEX_replicate4
b0096	106865	internal	PCB109_PCR12_Ecoli_TEX_replicate4
b0096	106934	internal	PCB109_PCR12_Ecoli_TEX_replicate4
b0096	107138	internal	PCB109_PCR12_Ecoli_TEX_replicate4
b0096	107238	internal	PCB109_PCR12_Ecoli_TEX_replicate4
b0096	107285	internal	PCB109_PCR12_Ecoli_TEX_replicate4
b0096	107447	internal	PCB109_PCR12_Ecoli_TEX_replicate4
b0096	107549	primary	PCB109_PCR12_Ecoli_TEX_replicate4
b0096	106673	internal	DCS109_Ecoli_NOTEX_replicate2
b0096	106817	internal	DCS109_Ecoli_NOTEX_replicate2
b0096	106865	internal	DCS109_Ecoli_NOTEX_replicate2
b0096	106986	internal	DCS109_Ecoli_NOTEX_replicate2
b0096	107058	internal	DCS109_Ecoli_NOTEX_replicate2
b0096	107363	internal	DCS109_Ecoli_NOTEX_replicate2
b0096	107549	primary	DCS109_Ecoli_NOTEX_replicate2
b0096	106673	internal	DCS109_Ecoli_NOTEX_replicate3
b0096	106817	internal	DCS109_Ecoli_NOTEX_replicate3
b0096	106830	internal	DCS109_Ecoli_NOTEX_replicate3
b0096	106849	internal	DCS109_Ecoli_NOTEX_replicate3
b0096	106934	internal	DCS109_Ecoli_NOTEX_replicate3
b0096	107549	primary	DCS109_Ecoli_NOTEX_replicate3
b0096	107547	primary	RNA002_Ecoli_NOTEX_replicate2
b0097	107955	internal	RNA001_Ecoli_TEX_replicate1
b0097	107894	internal	PCB109_PCR15_Ecoli_NOTEX_replicate5
b0097	107881	internal	PCB109_PCR12_Ecoli_NOTEX_replicate4
b0097	108116	internal	PCB109_PCR12_Ecoli_NOTEX_replicate4
b0097	108143	internal	PCB109_PCR12_Ecoli_TEX_replicate4
b0098	111026	primary	RNA001_Ecoli_TEX_replicate1
b0098	111028	primary	PCB109_PCR15_Ecoli_TEX_replicate4
b0098	111028	primary	PCB109_PCR15_Ecoli_TEX_replicate5
b0098	110948	internal	PCB109_PCR12_Ecoli_NOTEX_replicate4
b0098	111029	primary	PCB109_PCR12_Ecoli_NOTEX_replicate4
b0098	111029	primary	PCB109_PCR12_Ecoli_TEX_replicate4
b0098	111029	primary	DCS109_Ecoli_NOTEX_replicate2
b0098	111027	primary	DCS109_Ecoli_NOTEX_replicate3
b0101	111588	secondary	PCB109_PCR12_Ecoli_NOTEX_replicate4
b0101	111795	internal	DCS109_Ecoli_NOTEX_replicate3
b0102	111588	primary	PCB109_PCR12_Ecoli_NOTEX_replicate4
b0102	111795	primary	DCS109_Ecoli_NOTEX_replicate3
b0104	114526	primary	RNA001_Ecoli_TEX_replicate1
b0104	114071	internal	PCB109_PCR15_Ecoli_NOTEX_replicate4
b0104	114526	primary	PCB109_PCR15_Ecoli_NOTEX_replicate4
b0104	113757	internal	PCB109_PCR15_Ecoli_NOTEX_replicate5
b0104	113774	internal	PCB109_PCR15_Ecoli_NOTEX_replicate5
b0104	114526	primary	PCB109_PCR15_Ecoli_NOTEX_replicate5
b0104	113774	internal	PCB109_PCR15_Ecoli_TEX_replicate4
b0104	114526	primary	PCB109_PCR15_Ecoli_TEX_replicate4
b0104	113583	internal	PCB109_PCR15_Ecoli_TEX_replicate5
b0104	114526	primary	PCB109_PCR15_Ecoli_TEX_replicate5
b0104	113774	internal	PCB109_PCR12_Ecoli_NOTEX_replicate4
b0104	114299	internal	PCB109_PCR12_Ecoli_NOTEX_replicate4
b0104	114526	primary	PCB109_PCR12_Ecoli_NOTEX_replicate4
b0104	113774	internal	PCB109_PCR12_Ecoli_TEX_replicate4
b0104	114157	internal	PCB109_PCR12_Ecoli_TEX_replicate4
b0104	114526	primary	PCB109_PCR12_Ecoli_TEX_replicate4
b0104	114526	primary	DCS109_Ecoli_NOTEX_replicate2
b0104	114526	primary	DCS109_Ecoli_NOTEX_replicate3
b0109	117708	primary	PCB109_PCR15_Ecoli_TEX_replicate4
b0109	117710	primary	PCB109_PCR12_Ecoli_NOTEX_replicate4
b0109	117708	primary	PCB109_PCR12_Ecoli_TEX_replicate4
b0111	120172	primary	PCB109_PCR12_Ecoli_NOTEX_replicate4
b0113	122968	primary	RNA001_Ecoli_TEX_replicate1
b0113	122775	internal	PCB109_PCR15_Ecoli_NOTEX_replicate4
b0113	122940	secondary	PCB109_PCR15_Ecoli_NOTEX_replicate4
b0113	122968	primary	PCB109_PCR15_Ecoli_NOTEX_replicate4
b0113	122968	primary	PCB109_PCR15_Ecoli_TEX_replicate4
b0113	122941	secondary	PCB109_PCR12_Ecoli_NOTEX_replicate4
b0113	122968	primary	PCB109_PCR12_Ecoli_NOTEX_replicate4
b0113	122940	primary	PCB109_PCR12_Ecoli_TEX_replicate4
b0113	122967	primary	PCB109_PCR12_Ecoli_TEX_replicate4
b0113	122968	primary	DCS109_Ecoli_NOTEX_replicate3
b0114	124117	internal	PCB109_PCR15_Ecoli_NOTEX_replicate4
b0114	124984	internal	PCB109_PCR15_Ecoli_NOTEX_replicate4
b0114	125015	internal	PCB109_PCR15_Ecoli_NOTEX_replicate4
b0114	125057	internal	PCB109_PCR15_Ecoli_NOTEX_replicate4
b0114	125080	internal	PCB109_PCR15_Ecoli_NOTEX_replicate4
b0114	125219	internal	PCB109_PCR15_Ecoli_NOTEX_replicate4
b0114	125252	internal	PCB109_PCR15_Ecoli_NOTEX_replicate4
b0114	125376	internal	PCB109_PCR15_Ecoli_NOTEX_replicate4
b0114	125953	primary	PCB109_PCR15_Ecoli_NOTEX_replicate4
b0114	125057	internal	PCB109_PCR15_Ecoli_NOTEX_replicate5
b0114	125954	secondary	PCB109_PCR15_Ecoli_NOTEX_replicate5
b0114	123999	internal	PCB109_PCR15_Ecoli_TEX_replicate4
b0114	125953	primary	PCB109_PCR15_Ecoli_TEX_replicate4
b0114	125951	primary	PCB109_PCR15_Ecoli_TEX_replicate5
b0114	123842	internal	PCB109_PCR12_Ecoli_NOTEX_replicate4
b0114	123878	internal	PCB109_PCR12_Ecoli_NOTEX_replicate4
b0114	124020	internal	PCB109_PCR12_Ecoli_NOTEX_replicate4
b0114	124117	internal	PCB109_PCR12_Ecoli_NOTEX_replicate4
b0114	124159	internal	PCB109_PCR12_Ecoli_NOTEX_replicate4
b0114	124283	internal	PCB109_PCR12_Ecoli_NOTEX_replicate4
b0114	124330	internal	PCB109_PCR12_Ecoli_NOTEX_replicate4
b0114	124369	internal	PCB109_PCR12_Ecoli_NOTEX_replicate4
b0114	124447	internal	PCB109_PCR12_Ecoli_NOTEX_replicate4
b0114	124616	internal	PCB109_PCR12_Ecoli_NOTEX_replicate4
b0114	124915	internal	PCB109_PCR12_Ecoli_NOTEX_replicate4
b0114	125057	internal	PCB109_PCR12_Ecoli_NOTEX_replicate4
b0114	125176	internal	PCB109_PCR12_Ecoli_NOTEX_replicate4
b0114	125372	internal	PCB109_PCR12_Ecoli_NOTEX_replicate4
b0114	125453	internal	PCB109_PCR12_Ecoli_NOTEX_replicate4
b0114	125666	internal	PCB109_PCR12_Ecoli_NOTEX_replicate4
b0114	125709	secondary	PCB109_PCR12_Ecoli_NOTEX_replicate4
b0114	125837	secondary	PCB109_PCR12_Ecoli_NOTEX_replicate4
b0114	125953	primary	PCB109_PCR12_Ecoli_NOTEX_replicate4
b0114	125057	internal	PCB109_PCR12_Ecoli_TEX_replicate4
b0114	125685	secondary	PCB109_PCR12_Ecoli_TEX_replicate4
b0114	125953	primary	PCB109_PCR12_Ecoli_TEX_replicate4
b0114	125952	primary	DCS109_Ecoli_NOTEX_replicate2
b0114	125950	primary	DCS109_Ecoli_NOTEX_replicate3
b0115	127616	primary	RNA001_Ecoli_TEX_replicate1
b0115	125953	internal	PCB109_PCR15_Ecoli_NOTEX_replicate4
b0115	126307	internal	PCB109_PCR15_Ecoli_NOTEX_replicate4
b0115	126868	internal	PCB109_PCR15_Ecoli_NOTEX_replicate4
b0115	127618	secondary	PCB109_PCR15_Ecoli_NOTEX_replicate4
b0115	127837	secondary	PCB109_PCR15_Ecoli_NOTEX_replicate4
b0115	125954	internal	PCB109_PCR15_Ecoli_NOTEX_replicate5
b0115	127618	primary	PCB109_PCR15_Ecoli_NOTEX_replicate5
b0115	125953	internal	PCB109_PCR15_Ecoli_TEX_replicate4
b0115	126305	internal	PCB109_PCR15_Ecoli_TEX_replicate4
b0115	126870	internal	PCB109_PCR15_Ecoli_TEX_replicate4
b0115	127620	secondary	PCB109_PCR15_Ecoli_TEX_replicate4
b0115	127851	secondary	PCB109_PCR15_Ecoli_TEX_replicate4
b0115	125951	internal	PCB109_PCR15_Ecoli_TEX_replicate5
b0115	127619	primary	PCB109_PCR15_Ecoli_TEX_replicate5
b0115	125709	internal	PCB109_PCR12_Ecoli_NOTEX_replicate4
b0115	125837	internal	PCB109_PCR12_Ecoli_NOTEX_replicate4
b0115	125953	internal	PCB109_PCR12_Ecoli_NOTEX_replicate4
b0115	126311	internal	PCB109_PCR12_Ecoli_NOTEX_replicate4
b0115	126411	internal	PCB109_PCR12_Ecoli_NOTEX_replicate4
b0115	126670	internal	PCB109_PCR12_Ecoli_NOTEX_replicate4
b0115	126881	internal	PCB109_PCR12_Ecoli_NOTEX_replicate4
b0115	127147	internal	PCB109_PCR12_Ecoli_NOTEX_replicate4
b0115	127559	internal	PCB109_PCR12_Ecoli_NOTEX_replicate4
b0115	127619	primary	PCB109_PCR12_Ecoli_NOTEX_replicate4
b0115	127837	secondary	PCB109_PCR12_Ecoli_NOTEX_replicate4
b0115	127883	secondary	PCB109_PCR12_Ecoli_NOTEX_replicate4
b0115	125953	internal	PCB109_PCR12_Ecoli_TEX_replicate4
b0115	127559	internal	PCB109_PCR12_Ecoli_TEX_replicate4
b0115	127618	primary	PCB109_PCR12_Ecoli_TEX_replicate4
b0115	125952	internal	DCS109_Ecoli_NOTEX_replicate2
b0115	127559	internal	DCS109_Ecoli_NOTEX_replicate2
b0115	127620	primary	DCS109_Ecoli_NOTEX_replicate2
b0115	125950	internal	DCS109_Ecoli_NOTEX_replicate3
b0115	126048	internal	DCS109_Ecoli_NOTEX_replicate3
b0115	126113	internal	DCS109_Ecoli_NOTEX_replicate3
b0115	127620	primary	DCS109_Ecoli_NOTEX_replicate3
b0115	127847	secondary	DCS109_Ecoli_NOTEX_replicate3
b0115	127883	secondary	DCS109_Ecoli_NOTEX_replicate3
b0116	129312	internal	PCB109_PCR15_Ecoli_NOTEX_replicate4
b0116	129326	internal	PCB109_PCR15_Ecoli_NOTEX_replicate5
b0116	128070	internal	PCB109_PCR15_Ecoli_TEX_replicate5
b0116	128496	internal	PCB109_PCR12_Ecoli_NOTEX_replicate4
b0116	129324	internal	PCB109_PCR12_Ecoli_NOTEX_replicate4
b0116	129318	internal	PCB109_PCR12_Ecoli_TEX_replicate4
b0116	129324	internal	DCS109_Ecoli_NOTEX_replicate3
b0118	134277	primary	RNA001_Ecoli_TEX_replicate1
b0118	131738	internal	PCB109_PCR15_Ecoli_NOTEX_replicate5
b0118	134483	primary	PCB109_PCR15_Ecoli_NOTEX_replicate5
b0118	131744	internal	PCB109_PCR15_Ecoli_TEX_replicate4
b0118	131623	internal	PCB109_PCR15_Ecoli_TEX_replicate5
b0118	131650	internal	PCB109_PCR15_Ecoli_TEX_replicate5
b0118	131741	internal	PCB109_PCR15_Ecoli_TEX_replicate5
b0118	134278	primary	PCB109_PCR12_Ecoli_NOTEX_replicate4
b0118	134278	primary	DCS109_Ecoli_NOTEX_replicate2
b0118	134278	primary	DCS109_Ecoli_NOTEX_replicate3
b0119	134573	internal	PCB109_PCR15_Ecoli_NOTEX_replicate4
b0119	134786	primary	PCB109_PCR15_Ecoli_NOTEX_replicate4
b0119	134483	internal	PCB109_PCR15_Ecoli_NOTEX_replicate5
b0119	134786	primary	PCB109_PCR15_Ecoli_NOTEX_replicate5
b0119	134786	primary	PCB109_PCR15_Ecoli_TEX_replicate4
b0119	134592	internal	PCB109_PCR15_Ecoli_TEX_replicate5
b0119	134787	primary	PCB109_PCR15_Ecoli_TEX_replicate5
b0119	134942	secondary	PCB109_PCR15_Ecoli_TEX_replicate5
b0119	134786	primary	PCB109_PCR12_Ecoli_NOTEX_replicate4
b0119	134875	secondary	PCB109_PCR12_Ecoli_NOTEX_replicate4
b0119	134786	primary	PCB109_PCR12_Ecoli_TEX_replicate4
b0119	134875	secondary	PCB109_PCR12_Ecoli_TEX_replicate4
b0120	134752	primary	RNA001_Ecoli_TEX_replicate1
b0120	134756	primary	PCB109_PCR15_Ecoli_NOTEX_replicate4
b0120	134753	primary	PCB109_PCR12_Ecoli_NOTEX_replicate4
b0120	134752	primary	DCS109_Ecoli_NOTEX_replicate3
b0120	134752	primary	RNA002_Ecoli_NOTEX_replicate2
b0121	136115	internal	DCS109_Ecoli_NOTEX_replicate3
b0126	141974	primary	PCB109_PCR15_Ecoli_NOTEX_replicate4
b0126	141974	primary	PCB109_PCR12_Ecoli_NOTEX_replicate4
b0126	141973	primary	DCS109_Ecoli_NOTEX_replicate2
b0126	141973	primary	DCS109_Ecoli_NOTEX_replicate3
b0128	144685	primary	PCB109_PCR15_Ecoli_TEX_replicate4
b0128	144685	primary	PCB109_PCR15_Ecoli_TEX_replicate5
b0128	144685	primary	DCS109_Ecoli_NOTEX_replicate3
b0129	144967	internal	PCB109_PCR15_Ecoli_NOTEX_replicate4
b0129	144967	internal	PCB109_PCR15_Ecoli_NOTEX_replicate5
b0129	144685	internal	PCB109_PCR15_Ecoli_TEX_replicate4
b0129	144967	internal	PCB109_PCR15_Ecoli_TEX_replicate4
b0129	144685	internal	PCB109_PCR15_Ecoli_TEX_replicate5
b0129	144796	internal	PCB109_PCR15_Ecoli_TEX_replicate5
b0129	144967	internal	PCB109_PCR15_Ecoli_TEX_replicate5
b0129	144967	internal	PCB109_PCR12_Ecoli_NOTEX_replicate4
b0129	144967	internal	PCB109_PCR12_Ecoli_TEX_replicate4
b0129	144685	internal	DCS109_Ecoli_NOTEX_replicate3
b0129	144970	internal	DCS109_Ecoli_NOTEX_replicate3
b0131	146276	primary	RNA001_Ecoli_TEX_replicate1
b0131	146277	primary	PCB109_PCR15_Ecoli_NOTEX_replicate4
b0131	146276	primary	PCB109_PCR15_Ecoli_NOTEX_replicate5
b0131	146276	primary	PCB109_PCR15_Ecoli_TEX_replicate4
b0131	146629	internal	PCB109_PCR15_Ecoli_TEX_replicate4
b0131	146276	primary	PCB109_PCR15_Ecoli_TEX_replicate5
b0131	146067	secondary	PCB109_PCR12_Ecoli_NOTEX_replicate4
b0131	146131	secondary	PCB109_PCR12_Ecoli_NOTEX_replicate4
b0131	146218	secondary	PCB109_PCR12_Ecoli_NOTEX_replicate4
b0131	146276	primary	PCB109_PCR12_Ecoli_NOTEX_replicate4
b0131	146278	primary	PCB109_PCR12_Ecoli_TEX_replicate4
b0131	146277	primary	DCS109_Ecoli_NOTEX_replicate2
b0131	146277	primary	DCS109_Ecoli_NOTEX_replicate3
b0133	147907	primary	PCB109_PCR15_Ecoli_NOTEX_replicate4
b0133	147776	primary	PCB109_PCR15_Ecoli_NOTEX_replicate5
b0133	147850	primary	PCB109_PCR15_Ecoli_NOTEX_replicate5
b0133	147907	primary	PCB109_PCR15_Ecoli_NOTEX_replicate5
b0133	147774	secondary	PCB109_PCR15_Ecoli_TEX_replicate4
b0133	147907	primary	PCB109_PCR15_Ecoli_TEX_replicate4
b0133	147774	secondary	PCB109_PCR15_Ecoli_TEX_replicate5
b0133	147905	primary	PCB109_PCR15_Ecoli_TEX_replicate5
b0133	147776	secondary	PCB109_PCR12_Ecoli_NOTEX_replicate4
b0133	147905	primary	PCB109_PCR12_Ecoli_NOTEX_replicate4
b0133	148746	internal	PCB109_PCR12_Ecoli_NOTEX_replicate4
b0133	147777	secondary	PCB109_PCR12_Ecoli_TEX_replicate4
b0133	147905	primary	PCB109_PCR12_Ecoli_TEX_replicate4
b0133	147907	primary	DCS109_Ecoli_NOTEX_replicate2
b0133	147905	primary	DCS109_Ecoli_NOTEX_replicate3
b0134	148746	primary	PCB109_PCR12_Ecoli_NOTEX_replicate4
b0142	157662	internal	PCB109_PCR15_Ecoli_NOTEX_replicate4
b0142	157190	secondary	PCB109_PCR15_Ecoli_NOTEX_replicate5
b0142	157664	internal	PCB109_PCR15_Ecoli_NOTEX_replicate5
b0142	157057	primary	PCB109_PCR15_Ecoli_TEX_replicate4
b0142	157340	internal	PCB109_PCR15_Ecoli_TEX_replicate5
b0142	157664	internal	PCB109_PCR15_Ecoli_TEX_replicate5
b0142	157165	secondary	PCB109_PCR12_Ecoli_NOTEX_replicate4
b0142	157429	internal	PCB109_PCR12_Ecoli_NOTEX_replicate4
b0142	157664	internal	PCB109_PCR12_Ecoli_NOTEX_replicate4
b0142	157322	internal	PCB109_PCR12_Ecoli_TEX_replicate4
b0142	157664	internal	PCB109_PCR12_Ecoli_TEX_replicate4
b0142	157659	internal	DCS109_Ecoli_NOTEX_replicate3
b0142	157671	internal	DCS109_Ecoli_NOTEX_replicate3
b0143	157662	primary	PCB109_PCR15_Ecoli_NOTEX_replicate4
b0143	159027	internal	PCB109_PCR15_Ecoli_NOTEX_replicate4
b0143	157664	primary	PCB109_PCR15_Ecoli_NOTEX_replicate5
b0143	158967	internal	PCB109_PCR15_Ecoli_NOTEX_replicate5
b0143	157664	primary	PCB109_PCR15_Ecoli_TEX_replicate5
b0143	157429	secondary	PCB109_PCR12_Ecoli_NOTEX_replicate4
b0143	157664	primary	PCB109_PCR12_Ecoli_NOTEX_replicate4
b0143	157734	internal	PCB109_PCR12_Ecoli_NOTEX_replicate4
b0143	158922	internal	PCB109_PCR12_Ecoli_NOTEX_replicate4
b0143	158968	internal	PCB109_PCR12_Ecoli_NOTEX_replicate4
b0143	159027	internal	PCB109_PCR12_Ecoli_NOTEX_replicate4
b0143	157664	primary	PCB109_PCR12_Ecoli_TEX_replicate4
b0143	158586	internal	PCB109_PCR12_Ecoli_TEX_replicate4
b0143	157659	primary	DCS109_Ecoli_NOTEX_replicate3
b0143	157671	primary	DCS109_Ecoli_NOTEX_replicate3
b0144	160097	internal	RNA001_Ecoli_TEX_replicate1
b0144	159027	secondary	PCB109_PCR15_Ecoli_NOTEX_replicate4
b0144	159240	internal	PCB109_PCR15_Ecoli_NOTEX_replicate4
b0144	160097	internal	PCB109_PCR15_Ecoli_NOTEX_replicate4
b0144	158967	secondary	PCB109_PCR15_Ecoli_NOTEX_replicate5
b0144	160097	internal	PCB109_PCR15_Ecoli_NOTEX_replicate5
b0144	160097	internal	PCB109_PCR15_Ecoli_TEX_replicate4
b0144	160097	internal	PCB109_PCR15_Ecoli_TEX_replicate5
b0144	158922	secondary	PCB109_PCR12_Ecoli_NOTEX_replicate4
b0144	158968	secondary	PCB109_PCR12_Ecoli_NOTEX_replicate4
b0144	159027	secondary	PCB109_PCR12_Ecoli_NOTEX_replicate4
b0144	160097	internal	PCB109_PCR12_Ecoli_NOTEX_replicate4
b0144	160097	internal	PCB109_PCR12_Ecoli_TEX_replicate4
b0144	160097	internal	DCS109_Ecoli_NOTEX_replicate2
b0144	160097	internal	DCS109_Ecoli_NOTEX_replicate3
b0144	160097	internal	RNA002_Ecoli_NOTEX_replicate2
b0145	160097	primary	RNA001_Ecoli_TEX_replicate1
b0145	160097	primary	PCB109_PCR15_Ecoli_NOTEX_replicate4
b0145	160097	primary	PCB109_PCR15_Ecoli_NOTEX_replicate5
b0145	160097	primary	PCB109_PCR15_Ecoli_TEX_replicate4
b0145	160097	primary	PCB109_PCR15_Ecoli_TEX_replicate5
b0145	160097	primary	PCB109_PCR12_Ecoli_NOTEX_replicate4
b0145	160320	internal	PCB109_PCR12_Ecoli_NOTEX_replicate4
b0145	160097	primary	PCB109_PCR12_Ecoli_TEX_replicate4
b0145	160097	primary	DCS109_Ecoli_NOTEX_replicate2
b0145	160097	primary	DCS109_Ecoli_NOTEX_replicate3
b0145	160097	primary	RNA002_Ecoli_NOTEX_replicate2
b0146	160926	internal	PCB109_PCR15_Ecoli_TEX_replicate4
b0148	164634	primary	PCB109_PCR15_Ecoli_NOTEX_replicate5
b0148	164634	primary	PCB109_PCR15_Ecoli_TEX_replicate5
b0148	162831	internal	PCB109_PCR12_Ecoli_NOTEX_replicate4
b0148	164612	secondary	PCB109_PCR12_Ecoli_TEX_replicate4
b0148	164634	primary	PCB109_PCR12_Ecoli_TEX_replicate4
b0149	166615	internal	PCB109_PCR15_Ecoli_NOTEX_replicate4
b0149	164938	internal	DCS109_Ecoli_NOTEX_replicate3
b0150	169764	primary	PCB109_PCR15_Ecoli_NOTEX_replicate4
b0150	169763	primary	PCB109_PCR15_Ecoli_NOTEX_replicate5
b0150	169763	primary	PCB109_PCR15_Ecoli_TEX_replicate5
b0150	169764	primary	PCB109_PCR12_Ecoli_NOTEX_replicate4
b0150	169763	primary	PCB109_PCR12_Ecoli_TEX_replicate4
b0150	169763	primary	DCS109_Ecoli_NOTEX_replicate3
b0154	174480	internal	PCB109_PCR15_Ecoli_NOTEX_replicate4
b0154	174500	internal	PCB109_PCR15_Ecoli_NOTEX_replicate4
b0154	174321	internal	PCB109_PCR15_Ecoli_NOTEX_replicate5
b0154	174506	internal	PCB109_PCR15_Ecoli_NOTEX_replicate5
b0154	174506	internal	PCB109_PCR15_Ecoli_TEX_replicate4
b0154	174484	internal	PCB109_PCR15_Ecoli_TEX_replicate5
b0154	174566	internal	PCB109_PCR15_Ecoli_TEX_replicate5
b0154	174038	internal	PCB109_PCR12_Ecoli_NOTEX_replicate4
b0154	174065	internal	PCB109_PCR12_Ecoli_TEX_replicate4
b0155	176144	internal	PCB109_PCR15_Ecoli_NOTEX_replicate4
b0155	176145	internal	PCB109_PCR15_Ecoli_NOTEX_replicate5
b0155	176144	internal	PCB109_PCR15_Ecoli_TEX_replicate4
b0155	176595	secondary	PCB109_PCR15_Ecoli_TEX_replicate4
b0155	176145	internal	PCB109_PCR15_Ecoli_TEX_replicate5
b0155	176313	internal	PCB109_PCR15_Ecoli_TEX_replicate5
b0155	176595	primary	PCB109_PCR15_Ecoli_TEX_replicate5
b0155	175158	internal	DCS109_Ecoli_NOTEX_replicate3
b0157	176961	primary	PCB109_PCR15_Ecoli_NOTEX_replicate4
b0157	176959	primary	PCB109_PCR15_Ecoli_NOTEX_replicate5
b0157	176962	primary	PCB109_PCR15_Ecoli_TEX_replicate5
b0157	177191	internal	PCB109_PCR15_Ecoli_TEX_replicate5
b0157	176966	primary	PCB109_PCR12_Ecoli_NOTEX_replicate4
b0157	176965	primary	PCB109_PCR12_Ecoli_TEX_replicate4
b0158	178423	internal	PCB109_PCR15_Ecoli_NOTEX_replicate4
b0158	178424	internal	PCB109_PCR15_Ecoli_NOTEX_replicate5
b0158	178424	internal	PCB109_PCR15_Ecoli_TEX_replicate4
b0158	178422	internal	PCB109_PCR15_Ecoli_TEX_replicate5
b0158	178423	internal	PCB109_PCR12_Ecoli_NOTEX_replicate4
b0158	178422	internal	PCB109_PCR12_Ecoli_TEX_replicate4
b0158	178423	internal	DCS109_Ecoli_NOTEX_replicate2
b0158	178423	internal	DCS109_Ecoli_NOTEX_replicate3
b0159	178423	secondary	PCB109_PCR15_Ecoli_NOTEX_replicate4
b0159	178797	internal	PCB109_PCR15_Ecoli_NOTEX_replicate4
b0159	178424	secondary	PCB109_PCR15_Ecoli_NOTEX_replicate5
b0159	178797	internal	PCB109_PCR15_Ecoli_NOTEX_replicate5
b0159	178424	secondary	PCB109_PCR15_Ecoli_TEX_replicate4
b0159	178797	internal	PCB109_PCR15_Ecoli_TEX_replicate4
b0159	178422	secondary	PCB109_PCR15_Ecoli_TEX_replicate5
b0159	178797	internal	PCB109_PCR15_Ecoli_TEX_replicate5
b0159	178423	primary	PCB109_PCR12_Ecoli_NOTEX_replicate4
b0159	178422	primary	PCB109_PCR12_Ecoli_TEX_replicate4
b0159	178797	internal	PCB109_PCR12_Ecoli_TEX_replicate4
b0159	178423	primary	DCS109_Ecoli_NOTEX_replicate2
b0159	178423	primary	DCS109_Ecoli_NOTEX_replicate3
b0161	182347	primary	PCB109_PCR15_Ecoli_NOTEX_replicate4
b0161	182347	primary	PCB109_PCR15_Ecoli_NOTEX_replicate5
b0161	182347	primary	PCB109_PCR15_Ecoli_TEX_replicate4
b0161	182347	primary	PCB109_PCR12_Ecoli_NOTEX_replicate4
b0161	182347	primary	PCB109_PCR12_Ecoli_TEX_replicate4
b0161	182347	primary	DCS109_Ecoli_NOTEX_replicate2
b0163	183653	primary	PCB109_PCR15_Ecoli_NOTEX_replicate4
b0163	183647	primary	PCB109_PCR15_Ecoli_TEX_replicate4
b0163	183649	primary	PCB109_PCR15_Ecoli_TEX_replicate5
b0163	183649	primary	PCB109_PCR12_Ecoli_NOTEX_replicate4
b0163	183649	primary	PCB109_PCR12_Ecoli_TEX_replicate4
b0163	183649	primary	DCS109_Ecoli_NOTEX_replicate3
b0164	184965	internal	PCB109_PCR12_Ecoli_NOTEX_replicate4
b0164	184989	internal	PCB109_PCR12_Ecoli_NOTEX_replicate4
b0164	184963	internal	DCS109_Ecoli_NOTEX_replicate3
b0166	185087	primary	RNA001_Ecoli_TEX_replicate1
b0166	185087	primary	PCB109_PCR15_Ecoli_NOTEX_replicate4
b0166	185087	primary	PCB109_PCR15_Ecoli_NOTEX_replicate5
b0166	185087	primary	PCB109_PCR15_Ecoli_TEX_replicate4
b0166	185087	primary	PCB109_PCR15_Ecoli_TEX_replicate5
b0166	184965	secondary	PCB109_PCR12_Ecoli_NOTEX_replicate4
b0166	184989	secondary	PCB109_PCR12_Ecoli_NOTEX_replicate4
b0166	185087	primary	PCB109_PCR12_Ecoli_NOTEX_replicate4
b0166	185140	internal	PCB109_PCR12_Ecoli_NOTEX_replicate4
b0166	185772	internal	PCB109_PCR12_Ecoli_NOTEX_replicate4
b0166	185087	primary	PCB109_PCR12_Ecoli_TEX_replicate4
b0166	185087	primary	DCS109_Ecoli_NOTEX_replicate2
b0166	185425	internal	DCS109_Ecoli_NOTEX_replicate2
b0166	184963	secondary	DCS109_Ecoli_NOTEX_replicate3
b0166	185087	primary	DCS109_Ecoli_NOTEX_replicate3
b0166	185087	primary	RNA002_Ecoli_NOTEX_replicate2
b0167	185772	primary	PCB109_PCR12_Ecoli_NOTEX_replicate4
b0168	188685	primary	PCB109_PCR15_Ecoli_NOTEX_replicate5
b0168	188684	primary	PCB109_PCR15_Ecoli_TEX_replicate5
b0168	188684	primary	DCS109_Ecoli_NOTEX_replicate2
b0169	190694	secondary	RNA001_Ecoli_TEX_replicate1
b0169	190793	primary	RNA001_Ecoli_TEX_replicate1
b0169	189940	internal	PCB109_PCR15_Ecoli_NOTEX_replicate4
b0169	189973	internal	PCB109_PCR15_Ecoli_NOTEX_replicate4
b0169	190002	internal	PCB109_PCR15_Ecoli_NOTEX_replicate4
b0169	190034	internal	PCB109_PCR15_Ecoli_NOTEX_replicate4
b0169	190044	internal	PCB109_PCR15_Ecoli_NOTEX_replicate4
b0169	190053	internal	PCB109_PCR15_Ecoli_NOTEX_replicate4
b0169	190076	internal	PCB109_PCR15_Ecoli_NOTEX_replicate4
b0169	190122	internal	PCB109_PCR15_Ecoli_NOTEX_replicate4
b0169	190185	internal	PCB109_PCR15_Ecoli_NOTEX_replicate4
b0169	190248	internal	PCB109_PCR15_Ecoli_NOTEX_replicate4
b0169	190361	internal	PCB109_PCR15_Ecoli_NOTEX_replicate4
b0169	190392	internal	PCB109_PCR15_Ecoli_NOTEX_replicate4
b0169	190494	internal	PCB109_PCR15_Ecoli_NOTEX_replicate4
b0169	190508	internal	PCB109_PCR15_Ecoli_NOTEX_replicate4
b0169	190553	internal	PCB109_PCR15_Ecoli_NOTEX_replicate4
b0169	190742	secondary	PCB109_PCR15_Ecoli_NOTEX_replicate4
b0169	190799	primary	PCB109_PCR15_Ecoli_NOTEX_replicate4
b0169	190838	secondary	PCB109_PCR15_Ecoli_NOTEX_replicate4
b0169	189933	internal	PCB109_PCR15_Ecoli_NOTEX_replicate5
b0169	189972	internal	PCB109_PCR15_Ecoli_NOTEX_replicate5
b0169	190053	internal	PCB109_PCR15_Ecoli_NOTEX_replicate5
b0169	190059	internal	PCB109_PCR15_Ecoli_NOTEX_replicate5
b0169	190191	internal	PCB109_PCR15_Ecoli_NOTEX_replicate5
b0169	190248	internal	PCB109_PCR15_Ecoli_NOTEX_replicate5
b0169	190290	internal	PCB109_PCR15_Ecoli_NOTEX_replicate5
b0169	190378	internal	PCB109_PCR15_Ecoli_NOTEX_replicate5
b0169	190431	internal	PCB109_PCR15_Ecoli_NOTEX_replicate5
b0169	190508	internal	PCB109_PCR15_Ecoli_NOTEX_replicate5
b0169	190607	secondary	PCB109_PCR15_Ecoli_NOTEX_replicate5
b0169	190694	secondary	PCB109_PCR15_Ecoli_NOTEX_replicate5
b0169	190799	primary	PCB109_PCR15_Ecoli_NOTEX_replicate5
b0169	190862	secondary	PCB109_PCR15_Ecoli_NOTEX_replicate5
b0169	189909	internal	PCB109_PCR15_Ecoli_TEX_replicate4
b0169	189974	internal	PCB109_PCR15_Ecoli_TEX_replicate4
b0169	189988	internal	PCB109_PCR15_Ecoli_TEX_replicate4
b0169	190053	internal	PCB109_PCR15_Ecoli_TEX_replicate4
b0169	190074	internal	PCB109_PCR15_Ecoli_TEX_replicate4
b0169	190185	internal	PCB109_PCR15_Ecoli_TEX_replicate4
b0169	190300	internal	PCB109_PCR15_Ecoli_TEX_replicate4
b0169	190508	internal	PCB109_PCR15_Ecoli_TEX_replicate4
b0169	190522	internal	PCB109_PCR15_Ecoli_TEX_replicate4
b0169	190694	secondary	PCB109_PCR15_Ecoli_TEX_replicate4
b0169	190798	primary	PCB109_PCR15_Ecoli_TEX_replicate4
b0169	190838	secondary	PCB109_PCR15_Ecoli_TEX_replicate4
b0169	189939	internal	PCB109_PCR15_Ecoli_TEX_replicate5
b0169	189972	internal	PCB109_PCR15_Ecoli_TEX_replicate5
b0169	190053	internal	PCB109_PCR15_Ecoli_TEX_replicate5
b0169	190263	internal	PCB109_PCR15_Ecoli_TEX_replicate5
b0169	190378	internal	PCB109_PCR15_Ecoli_TEX_replicate5
b0169	190431	internal	PCB109_PCR15_Ecoli_TEX_replicate5
b0169	190508	internal	PCB109_PCR15_Ecoli_TEX_replicate5
b0169	190540	internal	PCB109_PCR15_Ecoli_TEX_replicate5
b0169	190573	internal	PCB109_PCR15_Ecoli_TEX_replicate5
b0169	190618	secondary	PCB109_PCR15_Ecoli_TEX_replicate5
b0169	190694	secondary	PCB109_PCR15_Ecoli_TEX_replicate5
b0169	190741	secondary	PCB109_PCR15_Ecoli_TEX_replicate5
b0169	190799	primary	PCB109_PCR15_Ecoli_TEX_replicate5
b0169	190894	secondary	PCB109_PCR15_Ecoli_TEX_replicate5
b0169	189971	internal	PCB109_PCR12_Ecoli_NOTEX_replicate4
b0169	190000	internal	PCB109_PCR12_Ecoli_NOTEX_replicate4
b0169	190059	internal	PCB109_PCR12_Ecoli_NOTEX_replicate4
b0169	190131	internal	PCB109_PCR12_Ecoli_NOTEX_replicate4
b0169	190191	internal	PCB109_PCR12_Ecoli_NOTEX_replicate4
b0169	190263	internal	PCB109_PCR12_Ecoli_NOTEX_replicate4
b0169	190431	internal	PCB109_PCR12_Ecoli_NOTEX_replicate4
b0169	190508	internal	PCB109_PCR12_Ecoli_NOTEX_replicate4
b0169	190580	internal	PCB109_PCR12_Ecoli_NOTEX_replicate4
b0169	190659	secondary	PCB109_PCR12_Ecoli_NOTEX_replicate4
b0169	190741	secondary	PCB109_PCR12_Ecoli_NOTEX_replicate4
b0169	190799	primary	PCB109_PCR12_Ecoli_NOTEX_replicate4
b0169	190862	secondary	PCB109_PCR12_Ecoli_NOTEX_replicate4
b0169	189933	internal	PCB109_PCR12_Ecoli_TEX_replicate4
b0169	189972	internal	PCB109_PCR12_Ecoli_TEX_replicate4
b0169	190059	internal	PCB109_PCR12_Ecoli_TEX_replicate4
b0169	190191	internal	PCB109_PCR12_Ecoli_TEX_replicate4
b0169	190248	internal	PCB109_PCR12_Ecoli_TEX_replicate4
b0169	190300	internal	PCB109_PCR12_Ecoli_TEX_replicate4
b0169	190378	internal	PCB109_PCR12_Ecoli_TEX_replicate4
b0169	190508	internal	PCB109_PCR12_Ecoli_TEX_replicate4
b0169	190605	secondary	PCB109_PCR12_Ecoli_TEX_replicate4
b0169	190799	primary	PCB109_PCR12_Ecoli_TEX_replicate4
b0169	189935	internal	DCS109_Ecoli_NOTEX_replicate2
b0169	190079	internal	DCS109_Ecoli_NOTEX_replicate2
b0169	190191	internal	DCS109_Ecoli_NOTEX_replicate2
b0169	190508	internal	DCS109_Ecoli_NOTEX_replicate2
b0169	190693	secondary	DCS109_Ecoli_NOTEX_replicate2
b0169	190741	secondary	DCS109_Ecoli_NOTEX_replicate2
b0169	190799	primary	DCS109_Ecoli_NOTEX_replicate2
b0169	190862	secondary	DCS109_Ecoli_NOTEX_replicate2
b0169	190175	internal	DCS109_Ecoli_NOTEX_replicate3
b0169	190506	internal	DCS109_Ecoli_NOTEX_replicate3
b0169	190694	secondary	DCS109_Ecoli_NOTEX_replicate3
b0169	190736	secondary	DCS109_Ecoli_NOTEX_replicate3
b0169	190799	primary	DCS109_Ecoli_NOTEX_replicate3
b0169	190797	primary	RNA002_Ecoli_NOTEX_replicate2
b0170	191739	primary	RNA001_Ecoli_TEX_replicate1
b0170	191287	internal	PCB109_PCR15_Ecoli_NOTEX_replicate4
b0170	191745	primary	PCB109_PCR15_Ecoli_NOTEX_replicate4
b0170	190862	internal	PCB109_PCR15_Ecoli_NOTEX_replicate5
b0170	190976	internal	PCB109_PCR15_Ecoli_NOTEX_replicate5
b0170	191042	internal	PCB109_PCR15_Ecoli_NOTEX_replicate5
b0170	191373	internal	PCB109_PCR15_Ecoli_NOTEX_replicate5
b0170	191430	internal	PCB109_PCR15_Ecoli_NOTEX_replicate5
b0170	191480	internal	PCB109_PCR15_Ecoli_NOTEX_replicate5
b0170	191609	internal	PCB109_PCR15_Ecoli_NOTEX_replicate5
b0170	191745	primary	PCB109_PCR15_Ecoli_NOTEX_replicate5
b0170	191745	primary	PCB109_PCR15_Ecoli_TEX_replicate4
b0170	190894	internal	PCB109_PCR15_Ecoli_TEX_replicate5
b0170	190918	internal	PCB109_PCR15_Ecoli_TEX_replicate5
b0170	191037	internal	PCB109_PCR15_Ecoli_TEX_replicate5
b0170	191042	internal	PCB109_PCR15_Ecoli_TEX_replicate5
b0170	191096	internal	PCB109_PCR15_Ecoli_TEX_replicate5
b0170	191188	internal	PCB109_PCR15_Ecoli_TEX_replicate5
b0170	191609	internal	PCB109_PCR15_Ecoli_TEX_replicate5
b0170	191745	primary	PCB109_PCR15_Ecoli_TEX_replicate5
b0170	190862	internal	PCB109_PCR12_Ecoli_NOTEX_replicate4
b0170	190925	internal	PCB109_PCR12_Ecoli_NOTEX_replicate4
b0170	191040	internal	PCB109_PCR12_Ecoli_NOTEX_replicate4
b0170	191077	internal	PCB109_PCR12_Ecoli_NOTEX_replicate4
b0170	191164	internal	PCB109_PCR12_Ecoli_NOTEX_replicate4
b0170	191212	internal	PCB109_PCR12_Ecoli_NOTEX_replicate4
b0170	191321	internal	PCB109_PCR12_Ecoli_NOTEX_replicate4
b0170	191367	internal	PCB109_PCR12_Ecoli_NOTEX_replicate4
b0170	191430	internal	PCB109_PCR12_Ecoli_NOTEX_replicate4
b0170	191480	internal	PCB109_PCR12_Ecoli_NOTEX_replicate4
b0170	191543	internal	PCB109_PCR12_Ecoli_NOTEX_replicate4
b0170	191609	internal	PCB109_PCR12_Ecoli_NOTEX_replicate4
b0170	191652	internal	PCB109_PCR12_Ecoli_NOTEX_replicate4
b0170	191744	primary	PCB109_PCR12_Ecoli_NOTEX_replicate4
b0170	190952	internal	PCB109_PCR12_Ecoli_TEX_replicate4
b0170	190976	internal	PCB109_PCR12_Ecoli_TEX_replicate4
b0170	191006	internal	PCB109_PCR12_Ecoli_TEX_replicate4
b0170	191103	internal	PCB109_PCR12_Ecoli_TEX_replicate4
b0170	191164	internal	PCB109_PCR12_Ecoli_TEX_replicate4
b0170	191180	internal	PCB109_PCR12_Ecoli_TEX_replicate4
b0170	191228	internal	PCB109_PCR12_Ecoli_TEX_replicate4
b0170	191266	internal	PCB109_PCR12_Ecoli_TEX_replicate4
b0170	191322	internal	PCB109_PCR12_Ecoli_TEX_replicate4
b0170	191327	internal	PCB109_PCR12_Ecoli_TEX_replicate4
b0170	191380	internal	PCB109_PCR12_Ecoli_TEX_replicate4
b0170	191430	internal	PCB109_PCR12_Ecoli_TEX_replicate4
b0170	191573	internal	PCB109_PCR12_Ecoli_TEX_replicate4
b0170	191744	primary	PCB109_PCR12_Ecoli_TEX_replicate4
b0170	191821	secondary	PCB109_PCR12_Ecoli_TEX_replicate4
b0170	190862	internal	DCS109_Ecoli_NOTEX_replicate2
b0170	191609	internal	DCS109_Ecoli_NOTEX_replicate2
b0170	191744	primary	DCS109_Ecoli_NOTEX_replicate2
b0170	191609	internal	DCS109_Ecoli_NOTEX_replicate3
b0170	191744	primary	DCS109_Ecoli_NOTEX_replicate3
b0170	191743	primary	RNA002_Ecoli_NOTEX_replicate2
b0171	192551	internal	RNA001_Ecoli_TEX_replicate1
b0171	192164	internal	PCB109_PCR15_Ecoli_NOTEX_replicate4
b0171	192779	secondary	PCB109_PCR15_Ecoli_NOTEX_replicate4
b0171	192151	internal	PCB109_PCR15_Ecoli_NOTEX_replicate5
b0171	192202	internal	PCB109_PCR15_Ecoli_NOTEX_replicate5
b0171	192253	internal	PCB109_PCR15_Ecoli_NOTEX_replicate5
b0171	192549	internal	PCB109_PCR15_Ecoli_NOTEX_replicate5
b0171	192779	secondary	PCB109_PCR15_Ecoli_NOTEX_replicate5
b0171	192746	secondary	PCB109_PCR15_Ecoli_TEX_replicate4
b0171	192779	primary	PCB109_PCR15_Ecoli_TEX_replicate4
b0171	192166	internal	PCB109_PCR15_Ecoli_TEX_replicate5
b0171	192549	internal	PCB109_PCR15_Ecoli_TEX_replicate5
b0171	192778	primary	PCB109_PCR15_Ecoli_TEX_replicate5
b0171	192549	internal	PCB109_PCR12_Ecoli_NOTEX_replicate4
b0171	192747	secondary	PCB109_PCR12_Ecoli_NOTEX_replicate4
b0171	192363	internal	PCB109_PCR12_Ecoli_TEX_replicate4
b0171	192537	internal	PCB109_PCR12_Ecoli_TEX_replicate4
b0171	192777	primary	PCB109_PCR12_Ecoli_TEX_replicate4
b0171	192551	internal	DCS109_Ecoli_NOTEX_replicate2
b0171	192780	primary	DCS109_Ecoli_NOTEX_replicate3
b0172	193487	primary	RNA001_Ecoli_TEX_replicate1
b0172	192973	internal	PCB109_PCR15_Ecoli_NOTEX_replicate4
b0172	193490	primary	PCB109_PCR15_Ecoli_NOTEX_replicate4
b0172	193490	primary	PCB109_PCR15_Ecoli_NOTEX_replicate5
b0172	193490	primary	PCB109_PCR15_Ecoli_TEX_replicate4
b0172	193490	primary	PCB109_PCR15_Ecoli_TEX_replicate5
b0172	193440	secondary	PCB109_PCR12_Ecoli_NOTEX_replicate4
b0172	193490	primary	PCB109_PCR12_Ecoli_NOTEX_replicate4
b0172	193489	primary	PCB109_PCR12_Ecoli_TEX_replicate4
b0172	193490	primary	DCS109_Ecoli_NOTEX_replicate2
b0172	193487	primary	DCS109_Ecoli_NOTEX_replicate3
b0173	194253	internal	PCB109_PCR15_Ecoli_NOTEX_replicate4
b0173	194563	internal	PCB109_PCR15_Ecoli_TEX_replicate5
b0173	194844	primary	DCS109_Ecoli_NOTEX_replicate3
b0174	195471	internal	RNA001_Ecoli_TEX_replicate1
b0174	195571	internal	RNA001_Ecoli_TEX_replicate1
b0175	196333	internal	PCB109_PCR15_Ecoli_TEX_replicate5
b0176	196856	internal	PCB109_PCR15_Ecoli_NOTEX_replicate4
b0176	197746	internal	PCB109_PCR15_Ecoli_NOTEX_replicate4
b0176	197959	secondary	PCB109_PCR15_Ecoli_NOTEX_replicate4
b0176	197981	primary	PCB109_PCR15_Ecoli_NOTEX_replicate4
b0176	198042	secondary	PCB109_PCR15_Ecoli_NOTEX_replicate4
b0176	198117	secondary	PCB109_PCR15_Ecoli_NOTEX_replicate4
b0176	198153	secondary	PCB109_PCR15_Ecoli_NOTEX_replicate4
b0176	196856	internal	PCB109_PCR15_Ecoli_NOTEX_replicate5
b0176	197743	internal	PCB109_PCR15_Ecoli_NOTEX_replicate5
b0176	197809	internal	PCB109_PCR15_Ecoli_NOTEX_replicate5
b0176	197980	secondary	PCB109_PCR15_Ecoli_NOTEX_replicate5
b0176	198042	primary	PCB109_PCR15_Ecoli_NOTEX_replicate5
b0176	198113	secondary	PCB109_PCR15_Ecoli_NOTEX_replicate5
b0176	198128	secondary	PCB109_PCR15_Ecoli_NOTEX_replicate5
b0176	198153	secondary	PCB109_PCR15_Ecoli_NOTEX_replicate5
b0176	197476	internal	PCB109_PCR15_Ecoli_TEX_replicate4
b0176	197744	internal	PCB109_PCR15_Ecoli_TEX_replicate4
b0176	197762	internal	PCB109_PCR15_Ecoli_TEX_replicate4
b0176	197804	internal	PCB109_PCR15_Ecoli_TEX_replicate4
b0176	197982	primary	PCB109_PCR15_Ecoli_TEX_replicate4
b0176	198043	secondary	PCB109_PCR15_Ecoli_TEX_replicate4
b0176	198051	secondary	PCB109_PCR15_Ecoli_TEX_replicate4
b0176	198146	secondary	PCB109_PCR15_Ecoli_TEX_replicate4
b0176	198155	secondary	PCB109_PCR15_Ecoli_TEX_replicate4
b0176	197731	internal	PCB109_PCR15_Ecoli_TEX_replicate5
b0176	197764	internal	PCB109_PCR15_Ecoli_TEX_replicate5
b0176	197984	primary	PCB109_PCR15_Ecoli_TEX_replicate5
b0176	198033	primary	PCB109_PCR15_Ecoli_TEX_replicate5
b0176	198155	secondary	PCB109_PCR15_Ecoli_TEX_replicate5
b0176	196856	internal	PCB109_PCR12_Ecoli_NOTEX_replicate4
b0176	197476	internal	PCB109_PCR12_Ecoli_NOTEX_replicate4
b0176	197805	internal	PCB109_PCR12_Ecoli_NOTEX_replicate4
b0176	197956	secondary	PCB109_PCR12_Ecoli_NOTEX_replicate4
b0176	197987	secondary	PCB109_PCR12_Ecoli_NOTEX_replicate4
b0176	198038	primary	PCB109_PCR12_Ecoli_NOTEX_replicate4
b0176	198117	secondary	PCB109_PCR12_Ecoli_NOTEX_replicate4
b0176	197958	secondary	PCB109_PCR12_Ecoli_TEX_replicate4
b0176	197980	secondary	PCB109_PCR12_Ecoli_TEX_replicate4
b0176	198042	secondary	PCB109_PCR12_Ecoli_TEX_replicate4
b0176	198125	primary	PCB109_PCR12_Ecoli_TEX_replicate4
b0176	197958	primary	DCS109_Ecoli_NOTEX_replicate2
b0176	197979	primary	DCS109_Ecoli_NOTEX_replicate2
b0177	197959	internal	PCB109_PCR15_Ecoli_NOTEX_replicate4
b0177	197981	internal	PCB109_PCR15_Ecoli_NOTEX_replicate4
b0177	198042	internal	PCB109_PCR15_Ecoli_NOTEX_replicate4
b0177	198117	internal	PCB109_PCR15_Ecoli_NOTEX_replicate4
b0177	198153	internal	PCB109_PCR15_Ecoli_NOTEX_replicate4
b0177	198279	internal	PCB109_PCR15_Ecoli_NOTEX_replicate4
b0177	198525	internal	PCB109_PCR15_Ecoli_NOTEX_replicate4
b0177	199210	internal	PCB109_PCR15_Ecoli_NOTEX_replicate4
b0177	199484	internal	PCB109_PCR15_Ecoli_NOTEX_replicate4
b0177	197980	internal	PCB109_PCR15_Ecoli_NOTEX_replicate5
b0177	198042	internal	PCB109_PCR15_Ecoli_NOTEX_replicate5
b0177	198113	internal	PCB109_PCR15_Ecoli_NOTEX_replicate5
b0177	198128	internal	PCB109_PCR15_Ecoli_NOTEX_replicate5
b0177	198153	internal	PCB109_PCR15_Ecoli_NOTEX_replicate5
b0177	198251	internal	PCB109_PCR15_Ecoli_NOTEX_replicate5
b0177	197982	internal	PCB109_PCR15_Ecoli_TEX_replicate4
b0177	198043	internal	PCB109_PCR15_Ecoli_TEX_replicate4
b0177	198051	internal	PCB109_PCR15_Ecoli_TEX_replicate4
b0177	198146	internal	PCB109_PCR15_Ecoli_TEX_replicate4
b0177	198155	internal	PCB109_PCR15_Ecoli_TEX_replicate4
b0177	198319	internal	PCB109_PCR15_Ecoli_TEX_replicate4
b0177	199170	internal	PCB109_PCR15_Ecoli_TEX_replicate4
b0177	199240	internal	PCB109_PCR15_Ecoli_TEX_replicate4
b0177	199271	internal	PCB109_PCR15_Ecoli_TEX_replicate4
b0177	199343	internal	PCB109_PCR15_Ecoli_TEX_replicate4
b0177	199394	internal	PCB109_PCR15_Ecoli_TEX_replicate4
b0177	199428	internal	PCB109_PCR15_Ecoli_TEX_replicate4
b0177	199484	internal	PCB109_PCR15_Ecoli_TEX_replicate4
b0177	199488	internal	PCB109_PCR15_Ecoli_TEX_replicate4
b0177	197984	internal	PCB109_PCR15_Ecoli_TEX_replicate5
b0177	198033	internal	PCB109_PCR15_Ecoli_TEX_replicate5
b0177	198155	internal	PCB109_PCR15_Ecoli_TEX_replicate5
b0177	199344	internal	PCB109_PCR15_Ecoli_TEX_replicate5
b0177	199465	internal	PCB109_PCR15_Ecoli_TEX_replicate5
b0177	200230	internal	PCB109_PCR15_Ecoli_TEX_replicate5
b0177	197956	internal	PCB109_PCR12_Ecoli_NOTEX_replicate4
b0177	197987	internal	PCB109_PCR12_Ecoli_NOTEX_replicate4
b0177	198038	internal	PCB109_PCR12_Ecoli_NOTEX_replicate4
b0177	198117	internal	PCB109_PCR12_Ecoli_NOTEX_replicate4
b0177	198251	internal	PCB109_PCR12_Ecoli_NOTEX_replicate4
b0177	198390	internal	PCB109_PCR12_Ecoli_NOTEX_replicate4
b0177	198421	internal	PCB109_PCR12_Ecoli_NOTEX_replicate4
b0177	198449	internal	PCB109_PCR12_Ecoli_NOTEX_replicate4
b0177	198489	internal	PCB109_PCR12_Ecoli_NOTEX_replicate4
b0177	198539	internal	PCB109_PCR12_Ecoli_NOTEX_replicate4
b0177	198594	internal	PCB109_PCR12_Ecoli_NOTEX_replicate4
b0177	198723	internal	PCB109_PCR12_Ecoli_NOTEX_replicate4
b0177	198779	internal	PCB109_PCR12_Ecoli_NOTEX_replicate4
b0177	200025	internal	PCB109_PCR12_Ecoli_NOTEX_replicate4
b0177	200661	secondary	PCB109_PCR12_Ecoli_NOTEX_replicate4
b0177	197958	internal	PCB109_PCR12_Ecoli_TEX_replicate4
b0177	197980	internal	PCB109_PCR12_Ecoli_TEX_replicate4
b0177	198042	internal	PCB109_PCR12_Ecoli_TEX_replicate4
b0177	198125	internal	PCB109_PCR12_Ecoli_TEX_replicate4
b0177	198251	internal	PCB109_PCR12_Ecoli_TEX_replicate4
b0177	198523	internal	PCB109_PCR12_Ecoli_TEX_replicate4
b0177	198774	internal	PCB109_PCR12_Ecoli_TEX_replicate4
b0177	197958	internal	DCS109_Ecoli_NOTEX_replicate2
b0177	197979	internal	DCS109_Ecoli_NOTEX_replicate2
b0177	200025	internal	DCS109_Ecoli_NOTEX_replicate2
b0178	201053	primary	RNA001_Ecoli_TEX_replicate1
b0178	201053	primary	PCB109_PCR15_Ecoli_NOTEX_replicate4
b0178	201053	primary	PCB109_PCR15_Ecoli_NOTEX_replicate5
b0178	200679	internal	PCB109_PCR15_Ecoli_TEX_replicate4
b0178	201053	primary	PCB109_PCR15_Ecoli_TEX_replicate4
b0178	200679	internal	PCB109_PCR15_Ecoli_TEX_replicate5
b0178	201053	primary	PCB109_PCR15_Ecoli_TEX_replicate5
b0178	200661	internal	PCB109_PCR12_Ecoli_NOTEX_replicate4
b0178	201053	primary	PCB109_PCR12_Ecoli_NOTEX_replicate4
b0178	201172	secondary	PCB109_PCR12_Ecoli_NOTEX_replicate4
b0178	200679	internal	PCB109_PCR12_Ecoli_TEX_replicate4
b0178	201053	primary	PCB109_PCR12_Ecoli_TEX_replicate4
b0178	201053	primary	DCS109_Ecoli_NOTEX_replicate2
b0178	201053	primary	DCS109_Ecoli_NOTEX_replicate3
b0179	201053	internal	RNA001_Ecoli_TEX_replicate1
b0179	202063	primary	RNA001_Ecoli_TEX_replicate1
b0179	201053	internal	PCB109_PCR15_Ecoli_NOTEX_replicate4
b0179	202062	secondary	PCB109_PCR15_Ecoli_NOTEX_replicate4
b0179	201053	internal	PCB109_PCR15_Ecoli_NOTEX_replicate5
b0179	201839	internal	PCB109_PCR15_Ecoli_NOTEX_replicate5
b0179	201896	internal	PCB109_PCR15_Ecoli_NOTEX_replicate5
b0179	202064	primary	PCB109_PCR15_Ecoli_NOTEX_replicate5
b0179	201053	internal	PCB109_PCR15_Ecoli_TEX_replicate4
b0179	201899	internal	PCB109_PCR15_Ecoli_TEX_replicate4
b0179	202064	primary	PCB109_PCR15_Ecoli_TEX_replicate4
b0179	201053	internal	PCB109_PCR15_Ecoli_TEX_replicate5
b0179	201897	internal	PCB109_PCR15_Ecoli_TEX_replicate5
b0179	202062	secondary	PCB109_PCR15_Ecoli_TEX_replicate5
b0179	201053	internal	PCB109_PCR12_Ecoli_NOTEX_replicate4
b0179	201172	internal	PCB109_PCR12_Ecoli_NOTEX_replicate4
b0179	202062	secondary	PCB109_PCR12_Ecoli_NOTEX_replicate4
b0179	201053	internal	PCB109_PCR12_Ecoli_TEX_replicate4
b0179	202062	primary	PCB109_PCR12_Ecoli_TEX_replicate4
b0179	201053	internal	DCS109_Ecoli_NOTEX_replicate2
b0179	202063	secondary	DCS109_Ecoli_NOTEX_replicate2
b0179	201053	internal	DCS109_Ecoli_NOTEX_replicate3
b0179	202063	secondary	DCS109_Ecoli_NOTEX_replicate3
b0180	202652	primary	PCB109_PCR15_Ecoli_NOTEX_replicate4
b0180	202806	primary	PCB109_PCR15_Ecoli_NOTEX_replicate4
b0180	202749	primary	PCB109_PCR15_Ecoli_NOTEX_replicate5
b0180	202806	primary	PCB109_PCR15_Ecoli_NOTEX_replicate5
b0180	202449	internal	PCB109_PCR12_Ecoli_NOTEX_replicate4
b0180	202632	primary	PCB109_PCR12_Ecoli_NOTEX_replicate4
b0180	202806	primary	PCB109_PCR12_Ecoli_TEX_replicate4
b0181	203408	primary	RNA001_Ecoli_TEX_replicate1
b0181	202652	internal	PCB109_PCR15_Ecoli_NOTEX_replicate4
b0181	202806	internal	PCB109_PCR15_Ecoli_NOTEX_replicate4
b0181	202898	internal	PCB109_PCR15_Ecoli_NOTEX_replicate4
b0181	203407	primary	PCB109_PCR15_Ecoli_NOTEX_replicate4
b0181	203558	secondary	PCB109_PCR15_Ecoli_NOTEX_replicate4
b0181	202749	internal	PCB109_PCR15_Ecoli_NOTEX_replicate5
b0181	202806	internal	PCB109_PCR15_Ecoli_NOTEX_replicate5
b0181	203408	primary	PCB109_PCR15_Ecoli_NOTEX_replicate5
b0181	203606	secondary	PCB109_PCR15_Ecoli_NOTEX_replicate5
b0181	203408	primary	PCB109_PCR15_Ecoli_TEX_replicate4
b0181	203407	primary	PCB109_PCR15_Ecoli_TEX_replicate5
b0181	203605	secondary	PCB109_PCR15_Ecoli_TEX_replicate5
b0181	202632	internal	PCB109_PCR12_Ecoli_NOTEX_replicate4
b0181	202989	internal	PCB109_PCR12_Ecoli_NOTEX_replicate4
b0181	203092	internal	PCB109_PCR12_Ecoli_NOTEX_replicate4
b0181	203407	primary	PCB109_PCR12_Ecoli_NOTEX_replicate4
b0181	203545	secondary	PCB109_PCR12_Ecoli_NOTEX_replicate4
b0181	203605	secondary	PCB109_PCR12_Ecoli_NOTEX_replicate4
b0181	202806	internal	PCB109_PCR12_Ecoli_TEX_replicate4
b0181	203109	internal	PCB109_PCR12_Ecoli_TEX_replicate4
b0181	203407	primary	PCB109_PCR12_Ecoli_TEX_replicate4
b0181	203605	secondary	PCB109_PCR12_Ecoli_TEX_replicate4
b0181	203407	primary	DCS109_Ecoli_NOTEX_replicate2
b0181	203407	primary	DCS109_Ecoli_NOTEX_replicate3
b0181	203408	primary	RNA002_Ecoli_NOTEX_replicate2
b0182	203408	internal	RNA001_Ecoli_TEX_replicate1
b0182	203407	internal	PCB109_PCR15_Ecoli_NOTEX_replicate4
b0182	203558	internal	PCB109_PCR15_Ecoli_NOTEX_replicate4
b0182	203703	internal	PCB109_PCR15_Ecoli_NOTEX_replicate4
b0182	203732	internal	PCB109_PCR15_Ecoli_NOTEX_replicate4
b0182	203408	internal	PCB109_PCR15_Ecoli_NOTEX_replicate5
b0182	203606	internal	PCB109_PCR15_Ecoli_NOTEX_replicate5
b0182	203735	internal	PCB109_PCR15_Ecoli_NOTEX_replicate5
b0182	203795	internal	PCB109_PCR15_Ecoli_NOTEX_replicate5
b0182	203408	internal	PCB109_PCR15_Ecoli_TEX_replicate4
b0182	203407	internal	PCB109_PCR15_Ecoli_TEX_replicate5
b0182	203605	internal	PCB109_PCR15_Ecoli_TEX_replicate5
b0182	203407	internal	PCB109_PCR12_Ecoli_NOTEX_replicate4
b0182	203545	internal	PCB109_PCR12_Ecoli_NOTEX_replicate4
b0182	203605	internal	PCB109_PCR12_Ecoli_NOTEX_replicate4
b0182	203732	internal	PCB109_PCR12_Ecoli_NOTEX_replicate4
b0182	203407	internal	PCB109_PCR12_Ecoli_TEX_replicate4
b0182	203605	internal	PCB109_PCR12_Ecoli_TEX_replicate4
b0182	203407	internal	DCS109_Ecoli_NOTEX_replicate2
b0182	203795	internal	DCS109_Ecoli_NOTEX_replicate2
b0182	203407	internal	DCS109_Ecoli_NOTEX_replicate3
b0182	203749	internal	DCS109_Ecoli_NOTEX_replicate3
b0182	203408	internal	RNA002_Ecoli_NOTEX_replicate2
b0184	205462	internal	PCB109_PCR15_Ecoli_NOTEX_replicate4
b0184	205728	internal	PCB109_PCR15_Ecoli_NOTEX_replicate4
b0184	208382	internal	PCB109_PCR15_Ecoli_NOTEX_replicate4
b0184	205458	internal	PCB109_PCR15_Ecoli_TEX_replicate4
b0184	205566	internal	PCB109_PCR15_Ecoli_TEX_replicate4
b0184	205665	internal	PCB109_PCR15_Ecoli_TEX_replicate4
b0184	208504	internal	PCB109_PCR15_Ecoli_TEX_replicate4
b0184	208504	internal	PCB109_PCR12_Ecoli_TEX_replicate4
b0184	207393	internal	DCS109_Ecoli_NOTEX_replicate3
b0184	208393	internal	DCS109_Ecoli_NOTEX_replicate3
b0185	208992	internal	RNA001_Ecoli_TEX_replicate1
b0185	208992	internal	PCB109_PCR15_Ecoli_NOTEX_replicate4
b0185	208992	internal	PCB109_PCR15_Ecoli_NOTEX_replicate5
b0185	208992	internal	PCB109_PCR15_Ecoli_TEX_replicate4
b0185	208992	internal	PCB109_PCR12_Ecoli_NOTEX_replicate4
b0185	208992	internal	PCB109_PCR12_Ecoli_TEX_replicate4
b0185	208992	internal	DCS109_Ecoli_NOTEX_replicate3
b0188	213669	primary	PCB109_PCR12_Ecoli_NOTEX_replicate4
b0188	213819	primary	PCB109_PCR12_Ecoli_TEX_replicate4
b0189	213833	internal	PCB109_PCR12_Ecoli_TEX_replicate4
b0189	213863	internal	PCB109_PCR12_Ecoli_TEX_replicate4
b0190	215131	primary	PCB109_PCR12_Ecoli_NOTEX_replicate4
b0190	215131	primary	PCB109_PCR12_Ecoli_TEX_replicate4
b0190	215131	primary	DCS109_Ecoli_NOTEX_replicate2
b0191	215131	internal	PCB109_PCR12_Ecoli_NOTEX_replicate4
b0191	215131	internal	PCB109_PCR12_Ecoli_TEX_replicate4
b0191	215131	internal	DCS109_Ecoli_NOTEX_replicate2
b0193	216068	primary	PCB109_PCR12_Ecoli_TEX_replicate4
b0194	217022	primary	PCB109_PCR12_Ecoli_NOTEX_replicate4
b0194	217020	primary	PCB109_PCR12_Ecoli_TEX_replicate4
b0194	217020	primary	DCS109_Ecoli_NOTEX_replicate2
b0194	217025	primary	DCS109_Ecoli_NOTEX_replicate3
b0195	218801	primary	PCB109_PCR15_Ecoli_NOTEX_replicate4
b0195	218799	primary	PCB109_PCR15_Ecoli_NOTEX_replicate5
b0195	218799	secondary	PCB109_PCR15_Ecoli_TEX_replicate5
b0195	219433	internal	PCB109_PCR15_Ecoli_TEX_replicate5
b0195	218800	primary	PCB109_PCR12_Ecoli_NOTEX_replicate4
b0195	219214	internal	PCB109_PCR12_Ecoli_NOTEX_replicate4
b0195	219378	internal	PCB109_PCR12_Ecoli_NOTEX_replicate4
b0195	219437	internal	PCB109_PCR12_Ecoli_NOTEX_replicate4
b0195	219485	internal	PCB109_PCR12_Ecoli_NOTEX_replicate4
b0195	218801	primary	PCB109_PCR12_Ecoli_TEX_replicate4
b0195	219336	internal	PCB109_PCR12_Ecoli_TEX_replicate4
b0195	219437	internal	PCB109_PCR12_Ecoli_TEX_replicate4
b0195	219485	internal	PCB109_PCR12_Ecoli_TEX_replicate4
b0195	219437	internal	DCS109_Ecoli_NOTEX_replicate2
b0195	218798	primary	DCS109_Ecoli_NOTEX_replicate3
b0196	219783	internal	PCB109_PCR15_Ecoli_NOTEX_replicate5
b0196	219803	internal	PCB109_PCR15_Ecoli_NOTEX_replicate5
b0196	219853	internal	PCB109_PCR15_Ecoli_TEX_replicate4
b0196	219433	secondary	PCB109_PCR15_Ecoli_TEX_replicate5
b0196	219792	internal	PCB109_PCR15_Ecoli_TEX_replicate5
b0196	219804	internal	PCB109_PCR15_Ecoli_TEX_replicate5
b0196	219861	internal	PCB109_PCR15_Ecoli_TEX_replicate5
b0196	219924	internal	PCB109_PCR15_Ecoli_TEX_replicate5
b0196	219378	primary	PCB109_PCR12_Ecoli_NOTEX_replicate4
b0196	219437	secondary	PCB109_PCR12_Ecoli_NOTEX_replicate4
b0196	219485	secondary	PCB109_PCR12_Ecoli_NOTEX_replicate4
b0196	219336	secondary	PCB109_PCR12_Ecoli_TEX_replicate4
b0196	219437	primary	PCB109_PCR12_Ecoli_TEX_replicate4
b0196	219485	secondary	PCB109_PCR12_Ecoli_TEX_replicate4
b0196	219946	internal	PCB109_PCR12_Ecoli_TEX_replicate4
b0196	219437	primary	DCS109_Ecoli_NOTEX_replicate2
b0197	220052	primary	RNA001_Ecoli_TEX_replicate1
b0197	220053	primary	PCB109_PCR15_Ecoli_NOTEX_replicate5
b0197	219853	primary	PCB109_PCR15_Ecoli_TEX_replicate4
b0197	220053	primary	PCB109_PCR15_Ecoli_TEX_replicate4
b0197	219861	primary	PCB109_PCR15_Ecoli_TEX_replicate5
b0197	219924	secondary	PCB109_PCR15_Ecoli_TEX_replicate5
b0197	220053	secondary	PCB109_PCR15_Ecoli_TEX_replicate5
b0197	220053	primary	PCB109_PCR12_Ecoli_NOTEX_replicate4
b0197	219946	secondary	PCB109_PCR12_Ecoli_TEX_replicate4
b0197	220053	primary	PCB109_PCR12_Ecoli_TEX_replicate4
b0197	220053	primary	DCS109_Ecoli_NOTEX_replicate2
b0197	220053	primary	DCS109_Ecoli_NOTEX_replicate3
b0200	223655	primary	RNA001_Ecoli_TEX_replicate1
b0200	223581	secondary	PCB109_PCR15_Ecoli_NOTEX_replicate4
b0200	223655	primary	PCB109_PCR15_Ecoli_NOTEX_replicate4
b0200	223709	secondary	PCB109_PCR15_Ecoli_NOTEX_replicate4
b0200	223655	primary	PCB109_PCR15_Ecoli_NOTEX_replicate5
b0200	223655	primary	PCB109_PCR15_Ecoli_TEX_replicate4
b0200	223655	primary	PCB109_PCR15_Ecoli_TEX_replicate5
b0200	223655	primary	PCB109_PCR12_Ecoli_NOTEX_replicate4
b0200	223698	secondary	PCB109_PCR12_Ecoli_NOTEX_replicate4
b0200	223609	secondary	PCB109_PCR12_Ecoli_TEX_replicate4
b0200	223655	primary	PCB109_PCR12_Ecoli_TEX_replicate4
b0200	223655	primary	DCS109_Ecoli_NOTEX_replicate2
b0200	223655	primary	DCS109_Ecoli_NOTEX_replicate3
b0201	223800	internal	RNA001_Ecoli_TEX_replicate1
b0201	223890	internal	RNA001_Ecoli_TEX_replicate1
b0201	223973	internal	RNA001_Ecoli_TEX_replicate1
b0201	224052	internal	RNA001_Ecoli_TEX_replicate1
b0201	224091	internal	RNA001_Ecoli_TEX_replicate1
b0201	224376	internal	RNA001_Ecoli_TEX_replicate1
b0201	224447	internal	RNA001_Ecoli_TEX_replicate1
b0201	224540	internal	RNA001_Ecoli_TEX_replicate1
b0201	224589	internal	RNA001_Ecoli_TEX_replicate1
b0201	224632	internal	RNA001_Ecoli_TEX_replicate1
b0201	224655	internal	RNA001_Ecoli_TEX_replicate1
b0201	224770	internal	RNA001_Ecoli_TEX_replicate1
b0201	224814	internal	RNA001_Ecoli_TEX_replicate1
b0201	224881	internal	RNA001_Ecoli_TEX_replicate1
b0201	224961	internal	RNA001_Ecoli_TEX_replicate1
b0201	225029	internal	RNA001_Ecoli_TEX_replicate1
b0201	225083	internal	RNA001_Ecoli_TEX_replicate1
b0201	225312	primary	RNA001_Ecoli_TEX_replicate1
b0201	225376	secondary	RNA001_Ecoli_TEX_replicate1
b0201	225586	secondary	RNA001_Ecoli_TEX_replicate1
b0201	223801	internal	PCB109_PCR15_Ecoli_NOTEX_replicate4
b0201	223840	internal	PCB109_PCR15_Ecoli_NOTEX_replicate4
b0201	223858	internal	PCB109_PCR15_Ecoli_NOTEX_replicate4
b0201	223880	internal	PCB109_PCR15_Ecoli_NOTEX_replicate4
b0201	223897	internal	PCB109_PCR15_Ecoli_NOTEX_replicate4
b0201	223974	internal	PCB109_PCR15_Ecoli_NOTEX_replicate4
b0201	224003	internal	PCB109_PCR15_Ecoli_NOTEX_replicate4
b0201	224060	internal	PCB109_PCR15_Ecoli_NOTEX_replicate4
b0201	224173	internal	PCB109_PCR15_Ecoli_NOTEX_replicate4
b0201	224320	internal	PCB109_PCR15_Ecoli_NOTEX_replicate4
b0201	224374	internal	PCB109_PCR15_Ecoli_NOTEX_replicate4
b0201	224534	internal	PCB109_PCR15_Ecoli_NOTEX_replicate4
b0201	224721	internal	PCB109_PCR15_Ecoli_NOTEX_replicate4
b0201	224770	internal	PCB109_PCR15_Ecoli_NOTEX_replicate4
b0201	224845	internal	PCB109_PCR15_Ecoli_NOTEX_replicate4
b0201	224996	internal	PCB109_PCR15_Ecoli_NOTEX_replicate4
b0201	225020	internal	PCB109_PCR15_Ecoli_NOTEX_replicate4
b0201	225073	internal	PCB109_PCR15_Ecoli_NOTEX_replicate4
b0201	225152	internal	PCB109_PCR15_Ecoli_NOTEX_replicate4
b0201	225197	internal	PCB109_PCR15_Ecoli_NOTEX_replicate4
b0201	225265	internal	PCB109_PCR15_Ecoli_NOTEX_replicate4
b0201	225311	primary	PCB109_PCR15_Ecoli_NOTEX_replicate4
b0201	225586	secondary	PCB109_PCR15_Ecoli_NOTEX_replicate4
b0201	223788	internal	PCB109_PCR15_Ecoli_NOTEX_replicate5
b0201	223824	internal	PCB109_PCR15_Ecoli_NOTEX_replicate5
b0201	223869	internal	PCB109_PCR15_Ecoli_NOTEX_replicate5
b0201	224087	internal	PCB109_PCR15_Ecoli_NOTEX_replicate5
b0201	224131	internal	PCB109_PCR15_Ecoli_NOTEX_replicate5
b0201	224535	internal	PCB109_PCR15_Ecoli_NOTEX_replicate5
b0201	225130	internal	PCB109_PCR15_Ecoli_NOTEX_replicate5
b0201	225256	internal	PCB109_PCR15_Ecoli_NOTEX_replicate5
b0201	225311	primary	PCB109_PCR15_Ecoli_NOTEX_replicate5
b0201	225586	secondary	PCB109_PCR15_Ecoli_NOTEX_replicate5
b0201	223785	internal	PCB109_PCR15_Ecoli_TEX_replicate4
b0201	224060	internal	PCB109_PCR15_Ecoli_TEX_replicate4
b0201	224086	internal	PCB109_PCR15_Ecoli_TEX_replicate4
b0201	224122	internal	PCB109_PCR15_Ecoli_TEX_replicate4
b0201	224534	internal	PCB109_PCR15_Ecoli_TEX_replicate4
b0201	225152	internal	PCB109_PCR15_Ecoli_TEX_replicate4
b0201	225311	primary	PCB109_PCR15_Ecoli_TEX_replicate4
b0201	225456	secondary	PCB109_PCR15_Ecoli_TEX_replicate4
b0201	223795	internal	PCB109_PCR15_Ecoli_TEX_replicate5
b0201	224057	internal	PCB109_PCR15_Ecoli_TEX_replicate5
b0201	224084	internal	PCB109_PCR15_Ecoli_TEX_replicate5
b0201	225152	internal	PCB109_PCR15_Ecoli_TEX_replicate5
b0201	225311	primary	PCB109_PCR15_Ecoli_TEX_replicate5
b0201	225586	secondary	PCB109_PCR15_Ecoli_TEX_replicate5
b0201	223826	internal	PCB109_PCR12_Ecoli_NOTEX_replicate4
b0201	223849	internal	PCB109_PCR12_Ecoli_NOTEX_replicate4
b0201	223869	internal	PCB109_PCR12_Ecoli_NOTEX_replicate4
b0201	224060	internal	PCB109_PCR12_Ecoli_NOTEX_replicate4
b0201	224088	internal	PCB109_PCR12_Ecoli_NOTEX_replicate4
b0201	224120	internal	PCB109_PCR12_Ecoli_NOTEX_replicate4
b0201	224179	internal	PCB109_PCR12_Ecoli_NOTEX_replicate4
b0201	224266	internal	PCB109_PCR12_Ecoli_NOTEX_replicate4
b0201	224326	internal	PCB109_PCR12_Ecoli_NOTEX_replicate4
b0201	224428	internal	PCB109_PCR12_Ecoli_NOTEX_replicate4
b0201	224534	internal	PCB109_PCR12_Ecoli_NOTEX_replicate4
b0201	224655	internal	PCB109_PCR12_Ecoli_NOTEX_replicate4
b0201	224735	internal	PCB109_PCR12_Ecoli_NOTEX_replicate4
b0201	224770	internal	PCB109_PCR12_Ecoli_NOTEX_replicate4
b0201	224924	internal	PCB109_PCR12_Ecoli_NOTEX_replicate4
b0201	225071	internal	PCB109_PCR12_Ecoli_NOTEX_replicate4
b0201	225130	internal	PCB109_PCR12_Ecoli_NOTEX_replicate4
b0201	225311	primary	PCB109_PCR12_Ecoli_NOTEX_replicate4
b0201	223819	internal	PCB109_PCR12_Ecoli_TEX_replicate4
b0201	223868	internal	PCB109_PCR12_Ecoli_TEX_replicate4
b0201	224535	internal	PCB109_PCR12_Ecoli_TEX_replicate4
b0201	225130	internal	PCB109_PCR12_Ecoli_TEX_replicate4
b0201	225170	internal	PCB109_PCR12_Ecoli_TEX_replicate4
b0201	225275	internal	PCB109_PCR12_Ecoli_TEX_replicate4
b0201	225311	primary	PCB109_PCR12_Ecoli_TEX_replicate4
b0201	225344	secondary	PCB109_PCR12_Ecoli_TEX_replicate4
b0201	225586	secondary	PCB109_PCR12_Ecoli_TEX_replicate4
b0201	224059	internal	DCS109_Ecoli_NOTEX_replicate2
b0201	224132	internal	DCS109_Ecoli_NOTEX_replicate2
b0201	224269	internal	DCS109_Ecoli_NOTEX_replicate2
b0201	224320	internal	DCS109_Ecoli_NOTEX_replicate2
b0201	224421	internal	DCS109_Ecoli_NOTEX_replicate2
b0201	224478	internal	DCS109_Ecoli_NOTEX_replicate2
b0201	224534	internal	DCS109_Ecoli_NOTEX_replicate2
b0201	224624	internal	DCS109_Ecoli_NOTEX_replicate2
b0201	224664	internal	DCS109_Ecoli_NOTEX_replicate2
b0201	224769	internal	DCS109_Ecoli_NOTEX_replicate2
b0201	225021	internal	DCS109_Ecoli_NOTEX_replicate2
b0201	225112	internal	DCS109_Ecoli_NOTEX_replicate2
b0201	225152	internal	DCS109_Ecoli_NOTEX_replicate2
b0201	225197	internal	DCS109_Ecoli_NOTEX_replicate2
b0201	225311	primary	DCS109_Ecoli_NOTEX_replicate2
b0201	225456	secondary	DCS109_Ecoli_NOTEX_replicate2
b0201	223993	internal	DCS109_Ecoli_NOTEX_replicate3
b0201	224059	internal	DCS109_Ecoli_NOTEX_replicate3
b0201	224087	internal	DCS109_Ecoli_NOTEX_replicate3
b0201	224127	internal	DCS109_Ecoli_NOTEX_replicate3
b0201	224310	internal	DCS109_Ecoli_NOTEX_replicate3
b0201	224534	internal	DCS109_Ecoli_NOTEX_replicate3
b0201	224664	internal	DCS109_Ecoli_NOTEX_replicate3
b0201	224769	internal	DCS109_Ecoli_NOTEX_replicate3
b0201	224952	internal	DCS109_Ecoli_NOTEX_replicate3
b0201	225021	internal	DCS109_Ecoli_NOTEX_replicate3
b0201	225152	internal	DCS109_Ecoli_NOTEX_replicate3
b0201	225197	internal	DCS109_Ecoli_NOTEX_replicate3
b0201	225273	internal	DCS109_Ecoli_NOTEX_replicate3
b0201	225311	primary	DCS109_Ecoli_NOTEX_replicate3
b0201	223917	internal	RNA002_Ecoli_NOTEX_replicate2
b0201	223972	internal	RNA002_Ecoli_NOTEX_replicate2
b0201	224008	internal	RNA002_Ecoli_NOTEX_replicate2
b0201	224073	internal	RNA002_Ecoli_NOTEX_replicate2
b0201	224233	internal	RNA002_Ecoli_NOTEX_replicate2
b0201	224292	internal	RNA002_Ecoli_NOTEX_replicate2
b0201	224372	internal	RNA002_Ecoli_NOTEX_replicate2
b0201	224399	internal	RNA002_Ecoli_NOTEX_replicate2
b0201	224447	internal	RNA002_Ecoli_NOTEX_replicate2
b0201	224533	internal	RNA002_Ecoli_NOTEX_replicate2
b0201	224562	internal	RNA002_Ecoli_NOTEX_replicate2
b0201	224675	internal	RNA002_Ecoli_NOTEX_replicate2
b0201	224770	internal	RNA002_Ecoli_NOTEX_replicate2
b0201	224927	internal	RNA002_Ecoli_NOTEX_replicate2
b0201	224958	internal	RNA002_Ecoli_NOTEX_replicate2
b0201	225152	internal	RNA002_Ecoli_NOTEX_replicate2
b0201	225197	internal	RNA002_Ecoli_NOTEX_replicate2
b0201	225264	internal	RNA002_Ecoli_NOTEX_replicate2
b0201	225307	primary	RNA002_Ecoli_NOTEX_replicate2
b0201	223984	internal	RNA002_Ecoli_NOTEX_replicate3
b0201	224135	internal	RNA002_Ecoli_NOTEX_replicate3
b0201	224233	internal	RNA002_Ecoli_NOTEX_replicate3
b0201	224372	internal	RNA002_Ecoli_NOTEX_replicate3
b0201	224437	internal	RNA002_Ecoli_NOTEX_replicate3
b0201	224559	internal	RNA002_Ecoli_NOTEX_replicate3
b0201	224562	internal	RNA002_Ecoli_NOTEX_replicate3
b0201	224603	internal	RNA002_Ecoli_NOTEX_replicate3
b0201	224623	internal	RNA002_Ecoli_NOTEX_replicate3
b0201	224675	internal	RNA002_Ecoli_NOTEX_replicate3
b0201	224793	internal	RNA002_Ecoli_NOTEX_replicate3
b0201	224958	internal	RNA002_Ecoli_NOTEX_replicate3
b0201	225083	internal	RNA002_Ecoli_NOTEX_replicate3
b0201	225132	internal	RNA002_Ecoli_NOTEX_replicate3
b0201	225213	internal	RNA002_Ecoli_NOTEX_replicate3
b0201	225339	primary	RNA002_Ecoli_NOTEX_replicate3
b0202	225492	secondary	PCB109_PCR15_Ecoli_NOTEX_replicate5
b0202	225456	internal	PCB109_PCR15_Ecoli_TEX_replicate4
b0202	225492	secondary	PCB109_PCR15_Ecoli_TEX_replicate5
b0202	225492	secondary	PCB109_PCR12_Ecoli_NOTEX_replicate4
b0202	225463	secondary	PCB109_PCR12_Ecoli_TEX_replicate4
b0202	225456	internal	DCS109_Ecoli_NOTEX_replicate2
b0202	225492	secondary	DCS109_Ecoli_NOTEX_replicate2
b0202	225493	secondary	DCS109_Ecoli_NOTEX_replicate3
b0203	225586	primary	RNA001_Ecoli_TEX_replicate1
b0203	225586	primary	PCB109_PCR15_Ecoli_NOTEX_replicate4
b0203	225809	secondary	PCB109_PCR15_Ecoli_NOTEX_replicate4
b0203	225586	primary	PCB109_PCR15_Ecoli_NOTEX_replicate5
b0203	225632	secondary	PCB109_PCR15_Ecoli_NOTEX_replicate5
b0203	225685	secondary	PCB109_PCR15_Ecoli_NOTEX_replicate5
b0203	225751	secondary	PCB109_PCR15_Ecoli_NOTEX_replicate5
b0203	225586	secondary	PCB109_PCR15_Ecoli_TEX_replicate4
b0203	225639	secondary	PCB109_PCR15_Ecoli_TEX_replicate4
b0203	225708	secondary	PCB109_PCR15_Ecoli_TEX_replicate4
b0203	225751	primary	PCB109_PCR15_Ecoli_TEX_replicate4
b0203	225586	primary	PCB109_PCR15_Ecoli_TEX_replicate5
b0203	225639	secondary	PCB109_PCR15_Ecoli_TEX_replicate5
b0203	225706	secondary	PCB109_PCR15_Ecoli_TEX_replicate5
b0203	225751	secondary	PCB109_PCR15_Ecoli_TEX_replicate5
b0203	225586	secondary	PCB109_PCR12_Ecoli_NOTEX_replicate4
b0203	225751	primary	PCB109_PCR12_Ecoli_NOTEX_replicate4
b0203	225781	secondary	PCB109_PCR12_Ecoli_NOTEX_replicate4
b0203	225874	secondary	PCB109_PCR12_Ecoli_NOTEX_replicate4
b0203	225586	primary	PCB109_PCR12_Ecoli_TEX_replicate4
b0203	225631	secondary	PCB109_PCR12_Ecoli_TEX_replicate4
b0203	225751	secondary	PCB109_PCR12_Ecoli_TEX_replicate4
b0203	225586	secondary	DCS109_Ecoli_NOTEX_replicate2
b0203	225632	secondary	DCS109_Ecoli_NOTEX_replicate2
b0203	225708	secondary	DCS109_Ecoli_NOTEX_replicate2
b0203	225751	primary	DCS109_Ecoli_NOTEX_replicate2
b0203	225875	secondary	DCS109_Ecoli_NOTEX_replicate2
b0203	225586	secondary	DCS109_Ecoli_NOTEX_replicate3
b0203	225751	primary	DCS109_Ecoli_NOTEX_replicate3
b0203	225776	secondary	DCS109_Ecoli_NOTEX_replicate3
b0203	225873	secondary	DCS109_Ecoli_NOTEX_replicate3
b0204	226009	internal	RNA001_Ecoli_TEX_replicate1
b0204	226126	internal	RNA001_Ecoli_TEX_replicate1
b0204	226188	internal	RNA001_Ecoli_TEX_replicate1
b0204	226234	internal	RNA001_Ecoli_TEX_replicate1
b0204	226258	internal	RNA001_Ecoli_TEX_replicate1
b0204	226287	internal	RNA001_Ecoli_TEX_replicate1
b0204	226326	internal	RNA001_Ecoli_TEX_replicate1
b0204	226393	internal	RNA001_Ecoli_TEX_replicate1
b0204	226502	internal	RNA001_Ecoli_TEX_replicate1
b0204	226570	internal	RNA001_Ecoli_TEX_replicate1
b0204	226583	internal	RNA001_Ecoli_TEX_replicate1
b0204	226706	internal	RNA001_Ecoli_TEX_replicate1
b0204	226748	internal	RNA001_Ecoli_TEX_replicate1
b0204	226787	internal	RNA001_Ecoli_TEX_replicate1
b0204	226841	internal	RNA001_Ecoli_TEX_replicate1
b0204	227013	internal	RNA001_Ecoli_TEX_replicate1
b0204	227056	internal	RNA001_Ecoli_TEX_replicate1
b0204	227108	internal	RNA001_Ecoli_TEX_replicate1
b0204	227136	internal	RNA001_Ecoli_TEX_replicate1
b0204	227216	internal	RNA001_Ecoli_TEX_replicate1
b0204	227259	internal	RNA001_Ecoli_TEX_replicate1
b0204	227320	internal	RNA001_Ecoli_TEX_replicate1
b0204	227368	internal	RNA001_Ecoli_TEX_replicate1
b0204	227405	internal	RNA001_Ecoli_TEX_replicate1
b0204	227410	internal	RNA001_Ecoli_TEX_replicate1
b0204	227433	internal	RNA001_Ecoli_TEX_replicate1
b0204	227471	internal	RNA001_Ecoli_TEX_replicate1
b0204	227515	internal	RNA001_Ecoli_TEX_replicate1
b0204	227540	internal	RNA001_Ecoli_TEX_replicate1
b0204	227595	internal	RNA001_Ecoli_TEX_replicate1
b0204	227668	internal	RNA001_Ecoli_TEX_replicate1
b0204	227773	internal	RNA001_Ecoli_TEX_replicate1
b0204	227882	internal	RNA001_Ecoli_TEX_replicate1
b0204	227926	internal	RNA001_Ecoli_TEX_replicate1
b0204	228015	internal	RNA001_Ecoli_TEX_replicate1
b0204	228257	internal	RNA001_Ecoli_TEX_replicate1
b0204	228433	internal	RNA001_Ecoli_TEX_replicate1
b0204	228581	internal	RNA001_Ecoli_TEX_replicate1
b0204	228663	primary	RNA001_Ecoli_TEX_replicate1
b0204	228721	secondary	RNA001_Ecoli_TEX_replicate1
b0204	228792	secondary	RNA001_Ecoli_TEX_replicate1
b0204	228834	secondary	RNA001_Ecoli_TEX_replicate1
b0204	228879	secondary	RNA001_Ecoli_TEX_replicate1
b0204	225809	internal	PCB109_PCR15_Ecoli_NOTEX_replicate4
b0204	225881	internal	PCB109_PCR15_Ecoli_NOTEX_replicate4
b0204	225973	internal	PCB109_PCR15_Ecoli_NOTEX_replicate4
b0204	226079	internal	PCB109_PCR15_Ecoli_NOTEX_replicate4
b0204	226122	internal	PCB109_PCR15_Ecoli_NOTEX_replicate4
b0204	226234	internal	PCB109_PCR15_Ecoli_NOTEX_replicate4
b0204	226285	internal	PCB109_PCR15_Ecoli_NOTEX_replicate4
b0204	226437	internal	PCB109_PCR15_Ecoli_NOTEX_replicate4
b0204	226535	internal	PCB109_PCR15_Ecoli_NOTEX_replicate4
b0204	226689	internal	PCB109_PCR15_Ecoli_NOTEX_replicate4
b0204	226732	internal	PCB109_PCR15_Ecoli_NOTEX_replicate4
b0204	226783	internal	PCB109_PCR15_Ecoli_NOTEX_replicate4
b0204	226817	internal	PCB109_PCR15_Ecoli_NOTEX_replicate4
b0204	226873	internal	PCB109_PCR15_Ecoli_NOTEX_replicate4
b0204	226926	internal	PCB109_PCR15_Ecoli_NOTEX_replicate4
b0204	226961	internal	PCB109_PCR15_Ecoli_NOTEX_replicate4
b0204	227015	internal	PCB109_PCR15_Ecoli_NOTEX_replicate4
b0204	227055	internal	PCB109_PCR15_Ecoli_NOTEX_replicate4
b0204	227176	internal	PCB109_PCR15_Ecoli_NOTEX_replicate4
b0204	227229	internal	PCB109_PCR15_Ecoli_NOTEX_replicate4
b0204	227276	internal	PCB109_PCR15_Ecoli_NOTEX_replicate4
b0204	227319	internal	PCB109_PCR15_Ecoli_NOTEX_replicate4
b0204	227370	internal	PCB109_PCR15_Ecoli_NOTEX_replicate4
b0204	227425	internal	PCB109_PCR15_Ecoli_NOTEX_replicate4
b0204	227590	internal	PCB109_PCR15_Ecoli_NOTEX_replicate4
b0204	227668	internal	PCB109_PCR15_Ecoli_NOTEX_replicate4
b0204	227715	internal	PCB109_PCR15_Ecoli_NOTEX_replicate4
b0204	227766	internal	PCB109_PCR15_Ecoli_NOTEX_replicate4
b0204	227815	internal	PCB109_PCR15_Ecoli_NOTEX_replicate4
b0204	227995	internal	PCB109_PCR15_Ecoli_NOTEX_replicate4
b0204	228043	internal	PCB109_PCR15_Ecoli_NOTEX_replicate4
b0204	228079	internal	PCB109_PCR15_Ecoli_NOTEX_replicate4
b0204	228154	internal	PCB109_PCR15_Ecoli_NOTEX_replicate4
b0204	228187	internal	PCB109_PCR15_Ecoli_NOTEX_replicate4
b0204	228210	internal	PCB109_PCR15_Ecoli_NOTEX_replicate4
b0204	228257	internal	PCB109_PCR15_Ecoli_NOTEX_replicate4
b0204	228306	internal	PCB109_PCR15_Ecoli_NOTEX_replicate4
b0204	228389	internal	PCB109_PCR15_Ecoli_NOTEX_replicate4
b0204	228551	internal	PCB109_PCR15_Ecoli_NOTEX_replicate4
b0204	228662	primary	PCB109_PCR15_Ecoli_NOTEX_replicate4
b0204	228798	secondary	PCB109_PCR15_Ecoli_NOTEX_replicate4
b0204	228875	secondary	PCB109_PCR15_Ecoli_NOTEX_replicate4
b0204	226928	internal	PCB109_PCR15_Ecoli_NOTEX_replicate5
b0204	227289	internal	PCB109_PCR15_Ecoli_NOTEX_replicate5
b0204	227370	internal	PCB109_PCR15_Ecoli_NOTEX_replicate5
b0204	228389	internal	PCB109_PCR15_Ecoli_NOTEX_replicate5
b0204	228551	internal	PCB109_PCR15_Ecoli_NOTEX_replicate5
b0204	228662	primary	PCB109_PCR15_Ecoli_NOTEX_replicate5
b0204	226101	internal	PCB109_PCR15_Ecoli_TEX_replicate4
b0204	226124	internal	PCB109_PCR15_Ecoli_TEX_replicate4
b0204	226732	internal	PCB109_PCR15_Ecoli_TEX_replicate4
b0204	226782	internal	PCB109_PCR15_Ecoli_TEX_replicate4
b0204	226883	internal	PCB109_PCR15_Ecoli_TEX_replicate4
b0204	226925	internal	PCB109_PCR15_Ecoli_TEX_replicate4
b0204	226931	internal	PCB109_PCR15_Ecoli_TEX_replicate4
b0204	227056	internal	PCB109_PCR15_Ecoli_TEX_replicate4
b0204	227322	internal	PCB109_PCR15_Ecoli_TEX_replicate4
b0204	227365	internal	PCB109_PCR15_Ecoli_TEX_replicate4
b0204	227536	internal	PCB109_PCR15_Ecoli_TEX_replicate4
b0204	227592	internal	PCB109_PCR15_Ecoli_TEX_replicate4
b0204	227669	internal	PCB109_PCR15_Ecoli_TEX_replicate4
b0204	228257	internal	PCB109_PCR15_Ecoli_TEX_replicate4
b0204	228384	internal	PCB109_PCR15_Ecoli_TEX_replicate4
b0204	228494	internal	PCB109_PCR15_Ecoli_TEX_replicate4
b0204	228556	internal	PCB109_PCR15_Ecoli_TEX_replicate4
b0204	228662	primary	PCB109_PCR15_Ecoli_TEX_replicate4
b0204	228798	secondary	PCB109_PCR15_Ecoli_TEX_replicate4
b0204	225973	internal	PCB109_PCR15_Ecoli_TEX_replicate5
b0204	226234	internal	PCB109_PCR15_Ecoli_TEX_replicate5
b0204	227325	internal	PCB109_PCR15_Ecoli_TEX_replicate5
b0204	227370	internal	PCB109_PCR15_Ecoli_TEX_replicate5
b0204	228556	internal	PCB109_PCR15_Ecoli_TEX_replicate5
b0204	228662	primary	PCB109_PCR15_Ecoli_TEX_replicate5
b0204	228798	secondary	PCB109_PCR15_Ecoli_TEX_replicate5
b0204	225781	internal	PCB109_PCR12_Ecoli_NOTEX_replicate4
b0204	225874	internal	PCB109_PCR12_Ecoli_NOTEX_replicate4
b0204	225973	internal	PCB109_PCR12_Ecoli_NOTEX_replicate4
b0204	226021	internal	PCB109_PCR12_Ecoli_NOTEX_replicate4
b0204	226118	internal	PCB109_PCR12_Ecoli_NOTEX_replicate4
b0204	226203	internal	PCB109_PCR12_Ecoli_NOTEX_replicate4
b0204	226234	internal	PCB109_PCR12_Ecoli_NOTEX_replicate4
b0204	226285	internal	PCB109_PCR12_Ecoli_NOTEX_replicate4
b0204	226437	internal	PCB109_PCR12_Ecoli_NOTEX_replicate4
b0204	226538	internal	PCB109_PCR12_Ecoli_NOTEX_replicate4
b0204	226783	internal	PCB109_PCR12_Ecoli_NOTEX_replicate4
b0204	226841	internal	PCB109_PCR12_Ecoli_NOTEX_replicate4
b0204	226926	internal	PCB109_PCR12_Ecoli_NOTEX_replicate4
b0204	226961	internal	PCB109_PCR12_Ecoli_NOTEX_replicate4
b0204	227056	internal	PCB109_PCR12_Ecoli_NOTEX_replicate4
b0204	227370	internal	PCB109_PCR12_Ecoli_NOTEX_replicate4
b0204	227540	internal	PCB109_PCR12_Ecoli_NOTEX_replicate4
b0204	227592	internal	PCB109_PCR12_Ecoli_NOTEX_replicate4
b0204	227672	internal	PCB109_PCR12_Ecoli_NOTEX_replicate4
b0204	227770	internal	PCB109_PCR12_Ecoli_NOTEX_replicate4
b0204	227814	internal	PCB109_PCR12_Ecoli_NOTEX_replicate4
b0204	227943	internal	PCB109_PCR12_Ecoli_NOTEX_replicate4
b0204	227995	internal	PCB109_PCR12_Ecoli_NOTEX_replicate4
b0204	228005	internal	PCB109_PCR12_Ecoli_NOTEX_replicate4
b0204	228257	internal	PCB109_PCR12_Ecoli_NOTEX_replicate4
b0204	228388	internal	PCB109_PCR12_Ecoli_NOTEX_replicate4
b0204	228551	internal	PCB109_PCR12_Ecoli_NOTEX_replicate4
b0204	228662	primary	PCB109_PCR12_Ecoli_NOTEX_replicate4
b0204	228798	secondary	PCB109_PCR12_Ecoli_NOTEX_replicate4
b0204	228875	secondary	PCB109_PCR12_Ecoli_NOTEX_replicate4
b0204	226021	internal	PCB109_PCR12_Ecoli_TEX_replicate4
b0204	226124	internal	PCB109_PCR12_Ecoli_TEX_replicate4
b0204	227370	internal	PCB109_PCR12_Ecoli_TEX_replicate4
b0204	228551	internal	PCB109_PCR12_Ecoli_TEX_replicate4
b0204	228662	primary	PCB109_PCR12_Ecoli_TEX_replicate4
b0204	225875	internal	DCS109_Ecoli_NOTEX_replicate2
b0204	225973	internal	DCS109_Ecoli_NOTEX_replicate2
b0204	226018	internal	DCS109_Ecoli_NOTEX_replicate2
b0204	226099	internal	DCS109_Ecoli_NOTEX_replicate2
b0204	226147	internal	DCS109_Ecoli_NOTEX_replicate2
b0204	226179	internal	DCS109_Ecoli_NOTEX_replicate2
b0204	226234	internal	DCS109_Ecoli_NOTEX_replicate2
b0204	226258	internal	DCS109_Ecoli_NOTEX_replicate2
b0204	226388	internal	DCS109_Ecoli_NOTEX_replicate2
b0204	226505	internal	DCS109_Ecoli_NOTEX_replicate2
b0204	226548	internal	DCS109_Ecoli_NOTEX_replicate2
b0204	226783	internal	DCS109_Ecoli_NOTEX_replicate2
b0204	226841	internal	DCS109_Ecoli_NOTEX_replicate2
b0204	226931	internal	DCS109_Ecoli_NOTEX_replicate2
b0204	227030	internal	DCS109_Ecoli_NOTEX_replicate2
b0204	227057	internal	DCS109_Ecoli_NOTEX_replicate2
b0204	227365	internal	DCS109_Ecoli_NOTEX_replicate2
b0204	227425	internal	DCS109_Ecoli_NOTEX_replicate2
b0204	227540	internal	DCS109_Ecoli_NOTEX_replicate2
b0204	227595	internal	DCS109_Ecoli_NOTEX_replicate2
b0204	227693	internal	DCS109_Ecoli_NOTEX_replicate2
b0204	227751	internal	DCS109_Ecoli_NOTEX_replicate2
b0204	227773	internal	DCS109_Ecoli_NOTEX_replicate2
b0204	227814	internal	DCS109_Ecoli_NOTEX_replicate2
b0204	228133	internal	DCS109_Ecoli_NOTEX_replicate2
b0204	228186	internal	DCS109_Ecoli_NOTEX_replicate2
b0204	228257	internal	DCS109_Ecoli_NOTEX_replicate2
b0204	228389	internal	DCS109_Ecoli_NOTEX_replicate2
b0204	228489	internal	DCS109_Ecoli_NOTEX_replicate2
b0204	228546	internal	DCS109_Ecoli_NOTEX_replicate2
b0204	228556	internal	DCS109_Ecoli_NOTEX_replicate2
b0204	228568	internal	DCS109_Ecoli_NOTEX_replicate2
b0204	228662	primary	DCS109_Ecoli_NOTEX_replicate2
b0204	228798	secondary	DCS109_Ecoli_NOTEX_replicate2
b0204	228875	secondary	DCS109_Ecoli_NOTEX_replicate2
b0204	225776	internal	DCS109_Ecoli_NOTEX_replicate3
b0204	225873	internal	DCS109_Ecoli_NOTEX_replicate3
b0204	225903	internal	DCS109_Ecoli_NOTEX_replicate3
b0204	225973	internal	DCS109_Ecoli_NOTEX_replicate3
b0204	226002	internal	DCS109_Ecoli_NOTEX_replicate3
b0204	226072	internal	DCS109_Ecoli_NOTEX_replicate3
b0204	226099	internal	DCS109_Ecoli_NOTEX_replicate3
b0204	226258	internal	DCS109_Ecoli_NOTEX_replicate3
b0204	226285	internal	DCS109_Ecoli_NOTEX_replicate3
b0204	226340	internal	DCS109_Ecoli_NOTEX_replicate3
b0204	226388	internal	DCS109_Ecoli_NOTEX_replicate3
b0204	226432	internal	DCS109_Ecoli_NOTEX_replicate3
b0204	226506	internal	DCS109_Ecoli_NOTEX_replicate3
b0204	226735	internal	DCS109_Ecoli_NOTEX_replicate3
b0204	226841	internal	DCS109_Ecoli_NOTEX_replicate3
b0204	227000	internal	DCS109_Ecoli_NOTEX_replicate3
b0204	227029	internal	DCS109_Ecoli_NOTEX_replicate3
b0204	227058	internal	DCS109_Ecoli_NOTEX_replicate3
b0204	227326	internal	DCS109_Ecoli_NOTEX_replicate3
b0204	227365	internal	DCS109_Ecoli_NOTEX_replicate3
b0204	227417	internal	DCS109_Ecoli_NOTEX_replicate3
b0204	227540	internal	DCS109_Ecoli_NOTEX_replicate3
b0204	227693	internal	DCS109_Ecoli_NOTEX_replicate3
b0204	227912	internal	DCS109_Ecoli_NOTEX_replicate3
b0204	228023	internal	DCS109_Ecoli_NOTEX_replicate3
b0204	228147	internal	DCS109_Ecoli_NOTEX_replicate3
b0204	228157	internal	DCS109_Ecoli_NOTEX_replicate3
b0204	228186	internal	DCS109_Ecoli_NOTEX_replicate3
b0204	228389	internal	DCS109_Ecoli_NOTEX_replicate3
b0204	228490	internal	DCS109_Ecoli_NOTEX_replicate3
b0204	228556	internal	DCS109_Ecoli_NOTEX_replicate3
b0204	228577	internal	DCS109_Ecoli_NOTEX_replicate3
b0204	228662	primary	DCS109_Ecoli_NOTEX_replicate3
b0204	228744	secondary	DCS109_Ecoli_NOTEX_replicate3
b0204	228782	secondary	DCS109_Ecoli_NOTEX_replicate3
b0204	228875	secondary	DCS109_Ecoli_NOTEX_replicate3
b0204	225919	internal	RNA002_Ecoli_NOTEX_replicate2
b0204	225973	internal	RNA002_Ecoli_NOTEX_replicate2
b0204	226099	internal	RNA002_Ecoli_NOTEX_replicate2
b0204	226234	internal	RNA002_Ecoli_NOTEX_replicate2
b0204	226298	internal	RNA002_Ecoli_NOTEX_replicate2
b0204	226443	internal	RNA002_Ecoli_NOTEX_replicate2
b0204	226500	internal	RNA002_Ecoli_NOTEX_replicate2
b0204	226640	internal	RNA002_Ecoli_NOTEX_replicate2
b0204	226694	internal	RNA002_Ecoli_NOTEX_replicate2
b0204	226770	internal	RNA002_Ecoli_NOTEX_replicate2
b0204	226841	internal	RNA002_Ecoli_NOTEX_replicate2
b0204	226887	internal	RNA002_Ecoli_NOTEX_replicate2
b0204	226950	internal	RNA002_Ecoli_NOTEX_replicate2
b0204	227102	internal	RNA002_Ecoli_NOTEX_replicate2
b0204	227259	internal	RNA002_Ecoli_NOTEX_replicate2
b0204	227369	internal	RNA002_Ecoli_NOTEX_replicate2
b0204	227461	internal	RNA002_Ecoli_NOTEX_replicate2
b0204	227573	internal	RNA002_Ecoli_NOTEX_replicate2
b0204	227751	internal	RNA002_Ecoli_NOTEX_replicate2
b0204	227820	internal	RNA002_Ecoli_NOTEX_replicate2
b0204	228015	internal	RNA002_Ecoli_NOTEX_replicate2
b0204	228041	internal	RNA002_Ecoli_NOTEX_replicate2
b0204	228200	internal	RNA002_Ecoli_NOTEX_replicate2
b0204	228231	internal	RNA002_Ecoli_NOTEX_replicate2
b0204	228309	internal	RNA002_Ecoli_NOTEX_replicate2
b0204	228433	internal	RNA002_Ecoli_NOTEX_replicate2
[truncated: 21,028 more rows]
