# Supplementary material
Source: HighWire-hosted journal article supplement (doi:10.1101/rna.078937.121)
Supplement: Supplementary_Table6.xlsx [file Supplementary_Table6.xlsx]

## Sheet: Sheet1
seqnames	gene	genes_in_operon_all	size_operon	operon_seen	covered_by	perc_seen	sample
NC_000913.3	b0002	b0002	1	124	148	83.7838	RNA001_Ecoli_TEX_replicate1
NC_000913.3	b0003	b0003,b0004	2	61	377	16.1804	RNA001_Ecoli_TEX_replicate1
NC_000913.3	b0003	b0003	1	292	377	77.4536	RNA001_Ecoli_TEX_replicate1
NC_000913.3	b0004	b0004	1	95	161	59.0062	RNA001_Ecoli_TEX_replicate1
NC_000913.3	b0004	b0003,b0004	2	61	161	37.8882	RNA001_Ecoli_TEX_replicate1
NC_000913.3	b0005	b0005	1	55	58	94.8276	RNA001_Ecoli_TEX_replicate1
NC_000913.3	b0007	b0007	1	236	249	94.7791	RNA001_Ecoli_TEX_replicate1
NC_000913.3	b0008	b0008	1	426	426	100	RNA001_Ecoli_TEX_replicate1
NC_000913.3	b0009	b0009	1	62	86	72.093	RNA001_Ecoli_TEX_replicate1
NC_000913.3	b0010	b0010	1	365	389	93.8303	RNA001_Ecoli_TEX_replicate1
NC_000913.3	b0014	b0014,b0015	2	53	1304	4.06442	RNA001_Ecoli_TEX_replicate1
NC_000913.3	b0014	b0014	1	1242	1304	95.2454	RNA001_Ecoli_TEX_replicate1
NC_000913.3	b0015	b0015,b0016	2	159	1120	14.1964	RNA001_Ecoli_TEX_replicate1
NC_000913.3	b0015	b0015	1	899	1120	80.2679	RNA001_Ecoli_TEX_replicate1
NC_000913.3	b0015	b0014,b0015	2	53	1120	4.73214	RNA001_Ecoli_TEX_replicate1
NC_000913.3	b0016	b0016	1	299	482	62.0332	RNA001_Ecoli_TEX_replicate1
NC_000913.3	b0016	b0015,b0016	2	159	482	32.9876	RNA001_Ecoli_TEX_replicate1
NC_000913.3	b0018	b0018,b4412	2	97	131	74.0458	RNA001_Ecoli_TEX_replicate1
NC_000913.3	b0019	b0019	1	205	224	91.5179	RNA001_Ecoli_TEX_replicate1
NC_000913.3	b0020	b0020	1	47	67	70.1493	RNA001_Ecoli_TEX_replicate1
NC_000913.3	b0023	b0023	1	676	679	99.5582	RNA001_Ecoli_TEX_replicate1
NC_000913.3	b0025	b0025,b0026	2	207	1046	19.7897	RNA001_Ecoli_TEX_replicate1
NC_000913.3	b0025	b0025	1	836	1046	79.9235	RNA001_Ecoli_TEX_replicate1
NC_000913.3	b0026	b0026,b0027	2	260	1916	13.5699	RNA001_Ecoli_TEX_replicate1
NC_000913.3	b0026	b0026	1	1426	1916	74.4259	RNA001_Ecoli_TEX_replicate1
NC_000913.3	b0026	b0025,b0026	2	207	1916	10.8038	RNA001_Ecoli_TEX_replicate1
NC_000913.3	b0027	b0026,b0027	2	260	437	59.4966	RNA001_Ecoli_TEX_replicate1
NC_000913.3	b0027	b0027	1	143	437	32.7231	RNA001_Ecoli_TEX_replicate1
NC_000913.3	b0028	b0028,b0029	2	56	245	22.8571	RNA001_Ecoli_TEX_replicate1
NC_000913.3	b0028	b0028	1	158	245	64.4898	RNA001_Ecoli_TEX_replicate1
NC_000913.3	b0029	b0029	1	81	148	54.7297	RNA001_Ecoli_TEX_replicate1
NC_000913.3	b0029	b0028,b0029	2	56	148	37.8378	RNA001_Ecoli_TEX_replicate1
NC_000913.3	b0030	b0030	1	53	55	96.3636	RNA001_Ecoli_TEX_replicate1
NC_000913.3	b0031	b0031	1	372	375	99.2	RNA001_Ecoli_TEX_replicate1
NC_000913.3	b0033	b0033	1	51	56	91.0714	RNA001_Ecoli_TEX_replicate1
NC_000913.3	b0034	b0034	1	53	61	86.8852	RNA001_Ecoli_TEX_replicate1
NC_000913.3	b0035	b0035	1	49	57	85.9649	RNA001_Ecoli_TEX_replicate1
NC_000913.3	b0045	b0045	1	51	52	98.0769	RNA001_Ecoli_TEX_replicate1
NC_000913.3	b0047	b0047	1	84	86	97.6744	RNA001_Ecoli_TEX_replicate1
NC_000913.3	b0048	b0048,b0049	2	44	197	22.335	RNA001_Ecoli_TEX_replicate1
NC_000913.3	b0048	b0048	1	151	197	76.6497	RNA001_Ecoli_TEX_replicate1
NC_000913.3	b0049	b0049	1	199	276	72.1014	RNA001_Ecoli_TEX_replicate1
NC_000913.3	b0049	b0048,b0049	2	44	276	15.942	RNA001_Ecoli_TEX_replicate1
NC_000913.3	b0050	b0050,b0051,b0052	3	104	249	41.7671	RNA001_Ecoli_TEX_replicate1
NC_000913.3	b0050	b0050,b0051	2	49	249	19.6787	RNA001_Ecoli_TEX_replicate1
NC_000913.3	b0050	b0050	1	63	249	25.3012	RNA001_Ecoli_TEX_replicate1
NC_000913.3	b0051	b0051,b0052	2	146	389	37.5321	RNA001_Ecoli_TEX_replicate1
NC_000913.3	b0051	b0050,b0051,b0052	3	104	389	26.7352	RNA001_Ecoli_TEX_replicate1
NC_000913.3	b0051	b0051	1	56	389	14.3959	RNA001_Ecoli_TEX_replicate1
NC_000913.3	b0051	b0050,b0051	2	49	389	12.5964	RNA001_Ecoli_TEX_replicate1
NC_000913.3	b0052	b0052,b0053	2	92	554	16.6065	RNA001_Ecoli_TEX_replicate1
NC_000913.3	b0052	b0052	1	186	554	33.574	RNA001_Ecoli_TEX_replicate1
NC_000913.3	b0052	b0051,b0052	2	146	554	26.3538	RNA001_Ecoli_TEX_replicate1
NC_000913.3	b0052	b0050,b0051,b0052	3	104	554	18.7726	RNA001_Ecoli_TEX_replicate1
NC_000913.3	b0053	b0053	1	245	357	68.6275	RNA001_Ecoli_TEX_replicate1
NC_000913.3	b0053	b0052,b0053	2	92	357	25.7703	RNA001_Ecoli_TEX_replicate1
NC_000913.3	b0054	b0054	1	235	251	93.6255	RNA001_Ecoli_TEX_replicate1
NC_000913.3	b0055	b0055	1	84	87	96.5517	RNA001_Ecoli_TEX_replicate1
NC_000913.3	b0058	b0058,b0059	2	45	234	19.2308	RNA001_Ecoli_TEX_replicate1
NC_000913.3	b0058	b0058	1	189	234	80.7692	RNA001_Ecoli_TEX_replicate1
NC_000913.3	b0059	b0059	1	311	356	87.3596	RNA001_Ecoli_TEX_replicate1
NC_000913.3	b0059	b0058,b0059	2	45	356	12.6404	RNA001_Ecoli_TEX_replicate1
NC_000913.3	b0060	b0060	1	124	124	100	RNA001_Ecoli_TEX_replicate1
NC_000913.3	b0065	b0065	1	450	488	92.2131	RNA001_Ecoli_TEX_replicate1
NC_000913.3	b0067	b0067,b0068	2	86	198	43.4343	RNA001_Ecoli_TEX_replicate1
NC_000913.3	b0067	b0067	1	104	198	52.5253	RNA001_Ecoli_TEX_replicate1
NC_000913.3	b0068	b0068	1	430	516	83.3333	RNA001_Ecoli_TEX_replicate1
NC_000913.3	b0068	b0067,b0068	2	86	516	16.6667	RNA001_Ecoli_TEX_replicate1
NC_000913.3	b0069	b0069	1	49	50	98	RNA001_Ecoli_TEX_replicate1
NC_000913.3	b0070	b0070	1	397	409	97.066	RNA001_Ecoli_TEX_replicate1
NC_000913.3	b0071	b0071	1	74	88	84.0909	RNA001_Ecoli_TEX_replicate1
NC_000913.3	b0073	b0073	1	48	56	85.7143	RNA001_Ecoli_TEX_replicate1
NC_000913.3	b0077	b0077	1	47	48	97.9167	RNA001_Ecoli_TEX_replicate1
NC_000913.3	b0080	b0080	1	565	568	99.4718	RNA001_Ecoli_TEX_replicate1
NC_000913.3	b0081	b0081,b0082	2	243	1007	24.1311	RNA001_Ecoli_TEX_replicate1
NC_000913.3	b0081	b0081	1	743	1007	73.7835	RNA001_Ecoli_TEX_replicate1
NC_000913.3	b0082	b0082,b0083	2	162	1312	12.3476	RNA001_Ecoli_TEX_replicate1
NC_000913.3	b0082	b0082	1	876	1312	66.7683	RNA001_Ecoli_TEX_replicate1
NC_000913.3	b0082	b0081,b0082	2	243	1312	18.5213	RNA001_Ecoli_TEX_replicate1
NC_000913.3	b0083	b0082,b0083	2	162	292	55.4795	RNA001_Ecoli_TEX_replicate1
NC_000913.3	b0083	b0083	1	89	292	30.4795	RNA001_Ecoli_TEX_replicate1
NC_000913.3	b0084	b0084,b0085	2	111	1580	7.02532	RNA001_Ecoli_TEX_replicate1
NC_000913.3	b0084	b0084	1	1436	1580	90.8861	RNA001_Ecoli_TEX_replicate1
NC_000913.3	b0085	b0085	1	327	489	66.8712	RNA001_Ecoli_TEX_replicate1
NC_000913.3	b0085	b0084,b0085	2	111	489	22.6994	RNA001_Ecoli_TEX_replicate1
NC_000913.3	b0086	b0086,b0087	2	84	1444	5.81717	RNA001_Ecoli_TEX_replicate1
NC_000913.3	b0086	b0086	1	1306	1444	90.4432	RNA001_Ecoli_TEX_replicate1
NC_000913.3	b0087	b0087	1	318	451	70.51	RNA001_Ecoli_TEX_replicate1
NC_000913.3	b0087	b0086,b0087	2	84	451	18.6253	RNA001_Ecoli_TEX_replicate1
NC_000913.3	b0088	b0088,b0089	2	57	320	17.8125	RNA001_Ecoli_TEX_replicate1
NC_000913.3	b0088	b0088	1	219	320	68.4375	RNA001_Ecoli_TEX_replicate1
NC_000913.3	b0089	b0089,b0090	2	73	406	17.9803	RNA001_Ecoli_TEX_replicate1
NC_000913.3	b0089	b0089	1	271	406	66.7488	RNA001_Ecoli_TEX_replicate1
NC_000913.3	b0089	b0088,b0089	2	57	406	14.0394	RNA001_Ecoli_TEX_replicate1
NC_000913.3	b0090	b0090	1	283	396	71.4646	RNA001_Ecoli_TEX_replicate1
NC_000913.3	b0090	b0089,b0090	2	73	396	18.4343	RNA001_Ecoli_TEX_replicate1
NC_000913.3	b0091	b0091,b0092	2	66	301	21.9269	RNA001_Ecoli_TEX_replicate1
NC_000913.3	b0091	b0091	1	185	301	61.4618	RNA001_Ecoli_TEX_replicate1
NC_000913.3	b0092	b0092,b0093	2	45	299	15.0502	RNA001_Ecoli_TEX_replicate1
NC_000913.3	b0092	b0092	1	168	299	56.1873	RNA001_Ecoli_TEX_replicate1
NC_000913.3	b0092	b0091,b0092	2	66	299	22.0736	RNA001_Ecoli_TEX_replicate1
NC_000913.3	b0093	b0093,b0094	2	51	375	13.6	RNA001_Ecoli_TEX_replicate1
NC_000913.3	b0093	b0093	1	259	375	69.0667	RNA001_Ecoli_TEX_replicate1
NC_000913.3	b0093	b0092,b0093	2	45	375	12	RNA001_Ecoli_TEX_replicate1
NC_000913.3	b0094	b0094,b0095	2	104	761	13.6662	RNA001_Ecoli_TEX_replicate1
NC_000913.3	b0094	b0094	1	574	761	75.4271	RNA001_Ecoli_TEX_replicate1
NC_000913.3	b0094	b0093,b0094	2	51	761	6.70171	RNA001_Ecoli_TEX_replicate1
NC_000913.3	b0095	b0095,b0096	2	108	688	15.6977	RNA001_Ecoli_TEX_replicate1
NC_000913.3	b0095	b0095	1	455	688	66.1337	RNA001_Ecoli_TEX_replicate1
NC_000913.3	b0095	b0094,b0095	2	104	688	15.1163	RNA001_Ecoli_TEX_replicate1
NC_000913.3	b0096	b0096,b0097	2	64	2690	2.37918	RNA001_Ecoli_TEX_replicate1
NC_000913.3	b0096	b0096	1	2492	2690	92.6394	RNA001_Ecoli_TEX_replicate1
NC_000913.3	b0096	b0095,b0096	2	108	2690	4.01487	RNA001_Ecoli_TEX_replicate1
NC_000913.3	b0097	b0097,b0098	2	47	311	15.1125	RNA001_Ecoli_TEX_replicate1
NC_000913.3	b0097	b0097	1	194	311	62.3794	RNA001_Ecoli_TEX_replicate1
NC_000913.3	b0097	b0096,b0097	2	64	311	20.5788	RNA001_Ecoli_TEX_replicate1
NC_000913.3	b0098	b0098	1	864	925	93.4054	RNA001_Ecoli_TEX_replicate1
NC_000913.3	b0098	b0097,b0098	2	47	925	5.08108	RNA001_Ecoli_TEX_replicate1
NC_000913.3	b0099	b0099	1	50	67	74.6269	RNA001_Ecoli_TEX_replicate1
NC_000913.3	b0101	b0101,b0102	2	59	102	57.8431	RNA001_Ecoli_TEX_replicate1
NC_000913.3	b0102	b0102	1	102	189	53.9683	RNA001_Ecoli_TEX_replicate1
NC_000913.3	b0102	b0101,b0102	2	59	189	31.2169	RNA001_Ecoli_TEX_replicate1
NC_000913.3	b0103	b0103	1	69	93	74.1935	RNA001_Ecoli_TEX_replicate1
NC_000913.3	b0104	b0104	1	710	745	95.302	RNA001_Ecoli_TEX_replicate1
NC_000913.3	b0109	b0109	1	114	116	98.2759	RNA001_Ecoli_TEX_replicate1
NC_000913.3	b0110	b0110	1	110	138	79.7101	RNA001_Ecoli_TEX_replicate1
NC_000913.3	b0111	b0111	1	70	116	60.3448	RNA001_Ecoli_TEX_replicate1
NC_000913.3	b0112	b0112	1	133	155	85.8065	RNA001_Ecoli_TEX_replicate1
NC_000913.3	b0113	b0113	1	86	87	98.8506	RNA001_Ecoli_TEX_replicate1
NC_000913.3	b0114	b0114,b0115	2	276	2040	13.5294	RNA001_Ecoli_TEX_replicate1
NC_000913.3	b0114	b0114	1	1762	2040	86.3725	RNA001_Ecoli_TEX_replicate1
NC_000913.3	b0115	b0115	1	1099	1409	77.9986	RNA001_Ecoli_TEX_replicate1
NC_000913.3	b0115	b0114,b0115	2	276	1409	19.5884	RNA001_Ecoli_TEX_replicate1
NC_000913.3	b0116	b0116	1	1015	1060	95.7547	RNA001_Ecoli_TEX_replicate1
NC_000913.3	b0118	b0118	1	227	227	100	RNA001_Ecoli_TEX_replicate1
NC_000913.3	b0119	b0119,b0120	2	60	394	15.2284	RNA001_Ecoli_TEX_replicate1
NC_000913.3	b0119	b0119	1	333	394	84.5178	RNA001_Ecoli_TEX_replicate1
NC_000913.3	b0120	b0120	1	55	151	36.4238	RNA001_Ecoli_TEX_replicate1
NC_000913.3	b0120	b0119,b0120	2	60	151	39.7351	RNA001_Ecoli_TEX_replicate1
NC_000913.3	b0121	b0121	1	113	155	72.9032	RNA001_Ecoli_TEX_replicate1
NC_000913.3	b0123	b0123	1	84	92	91.3043	RNA001_Ecoli_TEX_replicate1
NC_000913.3	b0124	b0124	1	183	191	95.8115	RNA001_Ecoli_TEX_replicate1
NC_000913.3	b0125	b0125,b0126	2	122	460	26.5217	RNA001_Ecoli_TEX_replicate1
NC_000913.3	b0125	b0125	1	337	460	73.2609	RNA001_Ecoli_TEX_replicate1
NC_000913.3	b0126	b0126	1	95	224	42.4107	RNA001_Ecoli_TEX_replicate1
NC_000913.3	b0126	b0125,b0126	2	122	224	54.4643	RNA001_Ecoli_TEX_replicate1
NC_000913.3	b0127	b0127	1	50	70	71.4286	RNA001_Ecoli_TEX_replicate1
NC_000913.3	b0128	b0128	1	81	95	85.2632	RNA001_Ecoli_TEX_replicate1
NC_000913.3	b0129	b0129	1	267	287	93.0314	RNA001_Ecoli_TEX_replicate1
NC_000913.3	b0130	b0130,b0131	2	84	211	39.8104	RNA001_Ecoli_TEX_replicate1
NC_000913.3	b0130	b0130	1	109	211	51.6588	RNA001_Ecoli_TEX_replicate1
NC_000913.3	b0131	b0131	1	473	557	84.9192	RNA001_Ecoli_TEX_replicate1
NC_000913.3	b0131	b0130,b0131	2	84	557	15.0808	RNA001_Ecoli_TEX_replicate1
NC_000913.3	b0133	b0133,b0134	2	46	316	14.557	RNA001_Ecoli_TEX_replicate1
NC_000913.3	b0133	b0133	1	254	316	80.3797	RNA001_Ecoli_TEX_replicate1
NC_000913.3	b0134	b0134	1	87	134	64.9254	RNA001_Ecoli_TEX_replicate1
NC_000913.3	b0134	b0133,b0134	2	46	134	34.3284	RNA001_Ecoli_TEX_replicate1
NC_000913.3	b0142	b0142,b0143	2	101	257	39.2996	RNA001_Ecoli_TEX_replicate1
NC_000913.3	b0142	b0142	1	153	257	59.5331	RNA001_Ecoli_TEX_replicate1
NC_000913.3	b0143	b0143	1	777	921	84.3648	RNA001_Ecoli_TEX_replicate1
NC_000913.3	b0143	b0142,b0143	2	101	921	10.9663	RNA001_Ecoli_TEX_replicate1
NC_000913.3	b0144	b0144	1	132	185	71.3514	RNA001_Ecoli_TEX_replicate1
NC_000913.3	b0145	b0145	1	447	487	91.7864	RNA001_Ecoli_TEX_replicate1
NC_000913.3	b0146	b0146	1	53	85	62.3529	RNA001_Ecoli_TEX_replicate1
NC_000913.3	b0148	b0148,b0149	2	49	527	9.29791	RNA001_Ecoli_TEX_replicate1
NC_000913.3	b0148	b0148	1	474	527	89.9431	RNA001_Ecoli_TEX_replicate1
NC_000913.3	b0149	b0149	1	408	457	89.2779	RNA001_Ecoli_TEX_replicate1
NC_000913.3	b0149	b0148,b0149	2	49	457	10.7221	RNA001_Ecoli_TEX_replicate1
NC_000913.3	b0150	b0150	1	88	95	92.6316	RNA001_Ecoli_TEX_replicate1
NC_000913.3	b0153	b0153	1	180	221	81.448	RNA001_Ecoli_TEX_replicate1
NC_000913.3	b0154	b0154	1	1007	1043	96.5484	RNA001_Ecoli_TEX_replicate1
NC_000913.3	b0155	b0155,b0156	2	74	556	13.3094	RNA001_Ecoli_TEX_replicate1
NC_000913.3	b0155	b0155	1	481	556	86.5108	RNA001_Ecoli_TEX_replicate1
NC_000913.3	b0156	b0155,b0156	2	74	187	39.5722	RNA001_Ecoli_TEX_replicate1
NC_000913.3	b0156	b0156	1	85	187	45.4545	RNA001_Ecoli_TEX_replicate1
NC_000913.3	b0157	b0157	1	199	237	83.9662	RNA001_Ecoli_TEX_replicate1
NC_000913.3	b0159	b0159	1	250	258	96.8992	RNA001_Ecoli_TEX_replicate1
NC_000913.3	b0160	b0160	1	268	291	92.0962	RNA001_Ecoli_TEX_replicate1
NC_000913.3	b0161	b0161	1	153	177	86.4407	RNA001_Ecoli_TEX_replicate1
NC_000913.3	b0162	b0162	1	75	85	88.2353	RNA001_Ecoli_TEX_replicate1
NC_000913.3	b0163	b0163	1	117	129	90.6977	RNA001_Ecoli_TEX_replicate1
NC_000913.3	b0166	b0166	1	595	624	95.3526	RNA001_Ecoli_TEX_replicate1
NC_000913.3	b0167	b0167	1	61	64	95.3125	RNA001_Ecoli_TEX_replicate1
NC_000913.3	b0168	b0168	1	120	121	99.1736	RNA001_Ecoli_TEX_replicate1
NC_000913.3	b0169	b0169,b0170	2	82	3672	2.23312	RNA001_Ecoli_TEX_replicate1
NC_000913.3	b0169	b0169,b0170,b4414	3	511	3672	13.9161	RNA001_Ecoli_TEX_replicate1
NC_000913.3	b0169	b0169,b4414	2	2179	3672	59.341	RNA001_Ecoli_TEX_replicate1
NC_000913.3	b0169	b0169	1	862	3672	23.4749	RNA001_Ecoli_TEX_replicate1
NC_000913.3	b0170	b0169,b0170	2	82	1836	4.46623	RNA001_Ecoli_TEX_replicate1
NC_000913.3	b0170	b0170	1	1178	1836	64.1612	RNA001_Ecoli_TEX_replicate1
NC_000913.3	b0170	b0169,b0170,b4414	3	511	1836	27.8322	RNA001_Ecoli_TEX_replicate1
NC_000913.3	b0171	b0171,b0172	2	95	750	12.6667	RNA001_Ecoli_TEX_replicate1
NC_000913.3	b0171	b0171	1	590	750	78.6667	RNA001_Ecoli_TEX_replicate1
NC_000913.3	b0172	b0172	1	450	568	79.2254	RNA001_Ecoli_TEX_replicate1
NC_000913.3	b0172	b0171,b0172	2	95	568	16.7254	RNA001_Ecoli_TEX_replicate1
NC_000913.3	b0173	b0173	1	155	163	95.092	RNA001_Ecoli_TEX_replicate1
NC_000913.3	b0174	b0174	1	206	227	90.7489	RNA001_Ecoli_TEX_replicate1
NC_000913.3	b0175	b0175,b0176	2	53	283	18.7279	RNA001_Ecoli_TEX_replicate1
NC_000913.3	b0175	b0175	1	212	283	74.9117	RNA001_Ecoli_TEX_replicate1
NC_000913.3	b0176	b0176,b0177	2	184	993	18.5297	RNA001_Ecoli_TEX_replicate1
NC_000913.3	b0176	b0176	1	751	993	75.6294	RNA001_Ecoli_TEX_replicate1
NC_000913.3	b0176	b0175,b0176	2	53	993	5.33736	RNA001_Ecoli_TEX_replicate1
NC_000913.3	b0177	b0177,b0178	2	54	2165	2.49423	RNA001_Ecoli_TEX_replicate1
NC_000913.3	b0177	b0177	1	1903	2165	87.8984	RNA001_Ecoli_TEX_replicate1
NC_000913.3	b0177	b0176,b0177	2	184	2165	8.49885	RNA001_Ecoli_TEX_replicate1
NC_000913.3	b0178	b0178,b0179	2	120	525	22.8571	RNA001_Ecoli_TEX_replicate1
NC_000913.3	b0178	b0178	1	317	525	60.381	RNA001_Ecoli_TEX_replicate1
NC_000913.3	b0178	b0177,b0178	2	54	525	10.2857	RNA001_Ecoli_TEX_replicate1
NC_000913.3	b0179	b0179,b0180,b0181	3	63	891	7.07071	RNA001_Ecoli_TEX_replicate1
NC_000913.3	b0179	b0179,b0180	2	56	891	6.28507	RNA001_Ecoli_TEX_replicate1
NC_000913.3	b0179	b0179	1	600	891	67.3401	RNA001_Ecoli_TEX_replicate1
NC_000913.3	b0179	b0178,b0179	2	120	891	13.468	RNA001_Ecoli_TEX_replicate1
NC_000913.3	b0180	b0180,b0181	2	149	384	38.8021	RNA001_Ecoli_TEX_replicate1
NC_000913.3	b0180	b0179,b0180,b0181	3	63	384	16.4062	RNA001_Ecoli_TEX_replicate1
NC_000913.3	b0180	b0179,b0180	2	56	384	14.5833	RNA001_Ecoli_TEX_replicate1
NC_000913.3	b0180	b0180	1	65	384	16.9271	RNA001_Ecoli_TEX_replicate1
NC_000913.3	b0181	b0181,b0182	2	94	966	9.73085	RNA001_Ecoli_TEX_replicate1
NC_000913.3	b0181	b0181	1	613	966	63.4576	RNA001_Ecoli_TEX_replicate1
NC_000913.3	b0181	b0180,b0181	2	149	966	15.4244	RNA001_Ecoli_TEX_replicate1
NC_000913.3	b0181	b0179,b0180,b0181	3	63	966	6.52174	RNA001_Ecoli_TEX_replicate1
NC_000913.3	b0182	b0182	1	525	699	75.1073	RNA001_Ecoli_TEX_replicate1
NC_000913.3	b0182	b0181,b0182	2	94	699	13.4478	RNA001_Ecoli_TEX_replicate1
NC_000913.3	b0183	b0183	1	45	107	42.0561	RNA001_Ecoli_TEX_replicate1
NC_000913.3	b0184	b0184,b0185	2	71	1189	5.9714	RNA001_Ecoli_TEX_replicate1
NC_000913.3	b0184	b0184	1	1095	1189	92.0942	RNA001_Ecoli_TEX_replicate1
NC_000913.3	b0185	b0185	1	105	176	59.6591	RNA001_Ecoli_TEX_replicate1
NC_000913.3	b0185	b0184,b0185	2	71	176	40.3409	RNA001_Ecoli_TEX_replicate1
NC_000913.3	b0188	b0188	1	163	206	79.1262	RNA001_Ecoli_TEX_replicate1
NC_000913.3	b0189	b0189,b4406	2	158	227	69.6035	RNA001_Ecoli_TEX_replicate1
NC_000913.3	b0190	b0190	1	79	106	74.5283	RNA001_Ecoli_TEX_replicate1
NC_000913.3	b0192	b0192	1	54	73	73.9726	RNA001_Ecoli_TEX_replicate1
NC_000913.3	b0194	b0194	1	299	313	95.5272	RNA001_Ecoli_TEX_replicate1
NC_000913.3	b0195	b0195,b0196	2	227	282	80.4965	RNA001_Ecoli_TEX_replicate1
NC_000913.3	b0196	b0195,b0196	2	227	610	37.2131	RNA001_Ecoli_TEX_replicate1
NC_000913.3	b0196	b0196	1	368	610	60.3279	RNA001_Ecoli_TEX_replicate1
NC_000913.3	b0197	b0197	1	187	197	94.9239	RNA001_Ecoli_TEX_replicate1
NC_000913.3	b0200	b0200	1	50	50	100	RNA001_Ecoli_TEX_replicate1
NC_000913.3	b0209	b0209	1	65	80	81.25	RNA001_Ecoli_TEX_replicate1
NC_000913.3	b0210	b0210	1	55	71	77.4648	RNA001_Ecoli_TEX_replicate1
NC_000913.3	b0211	b0211	1	1210	1242	97.4235	RNA001_Ecoli_TEX_replicate1
NC_000913.3	b0213	b0213	1	433	463	93.5205	RNA001_Ecoli_TEX_replicate1
NC_000913.3	b0215	b0215	1	70	71	98.5915	RNA001_Ecoli_TEX_replicate1
NC_000913.3	b0217	b0217	1	97	101	96.0396	RNA001_Ecoli_TEX_replicate1
NC_000913.3	b0219	b0219	1	82	90	91.1111	RNA001_Ecoli_TEX_replicate1
NC_000913.3	b0220	b0220	1	113	116	97.4138	RNA001_Ecoli_TEX_replicate1
NC_000913.3	b0221	b0221	1	70	73	95.8904	RNA001_Ecoli_TEX_replicate1
NC_000913.3	b0222	b0222,b0223	2	142	1110	12.7928	RNA001_Ecoli_TEX_replicate1
NC_000913.3	b0222	b0222	1	949	1110	85.4955	RNA001_Ecoli_TEX_replicate1
NC_000913.3	b0223	b0223,b0224	2	56	431	12.993	RNA001_Ecoli_TEX_replicate1
NC_000913.3	b0223	b0223	1	213	431	49.42	RNA001_Ecoli_TEX_replicate1
NC_000913.3	b0223	b0222,b0223	2	142	431	32.9466	RNA001_Ecoli_TEX_replicate1
NC_000913.3	b0224	b0224	1	95	174	54.5977	RNA001_Ecoli_TEX_replicate1
NC_000913.3	b0224	b0223,b0224	2	56	174	32.1839	RNA001_Ecoli_TEX_replicate1
NC_000913.3	b0231	b0231	1	90	99	90.9091	RNA001_Ecoli_TEX_replicate1
NC_000913.3	b0237	b0237	1	676	714	94.6779	RNA001_Ecoli_TEX_replicate1
NC_000913.3	b0238	b0238	1	165	169	97.6331	RNA001_Ecoli_TEX_replicate1
NC_000913.3	b0239	b0239	1	190	196	96.9388	RNA001_Ecoli_TEX_replicate1
NC_000913.3	b0240	b0240,b0240	1	172	180	95.5556	RNA001_Ecoli_TEX_replicate1
NC_000913.3	b0240	b0240,b0240	1	172	180	95.5556	RNA001_Ecoli_TEX_replicate1
NC_000913.3	b0242	b0242,b0243	2	94	313	30.0319	RNA001_Ecoli_TEX_replicate1
NC_000913.3	b0242	b0242	1	219	313	69.9681	RNA001_Ecoli_TEX_replicate1
NC_000913.3	b0243	b0243	1	311	405	76.7901	RNA001_Ecoli_TEX_replicate1
NC_000913.3	b0243	b0242,b0243	2	94	405	23.2099	RNA001_Ecoli_TEX_replicate1
NC_000913.3	b0256	b0256	1	42	53	79.2453	RNA001_Ecoli_TEX_replicate1
NC_000913.3	b0259	b0259	1	194	200	97	RNA001_Ecoli_TEX_replicate1
NC_000913.3	b0261	b0261	1	55	64	85.9375	RNA001_Ecoli_TEX_replicate1
NC_000913.3	b0269	b0269	1	63	66	95.4545	RNA001_Ecoli_TEX_replicate1
NC_000913.3	b0272	b0272	1	63	71	88.7324	RNA001_Ecoli_TEX_replicate1
NC_000913.3	b0276	b0276	1	97	107	90.6542	RNA001_Ecoli_TEX_replicate1
NC_000913.3	b0280	b0280	1	54	67	80.597	RNA001_Ecoli_TEX_replicate1
NC_000913.3	b0281	b0281	1	76	90	84.4444	RNA001_Ecoli_TEX_replicate1
NC_000913.3	b0287	b0287	1	127	133	95.4887	RNA001_Ecoli_TEX_replicate1
NC_000913.3	b0288	b0288	1	79	85	92.9412	RNA001_Ecoli_TEX_replicate1
NC_000913.3	b0306	b0306	1	45	50	90	RNA001_Ecoli_TEX_replicate1
NC_000913.3	b0307	b0307	1	81	96	84.375	RNA001_Ecoli_TEX_replicate1
NC_000913.3	b0308	b0308	1	42	54	77.7778	RNA001_Ecoli_TEX_replicate1
NC_000913.3	b0314	b0314	1	86	86	100	RNA001_Ecoli_TEX_replicate1
NC_000913.3	b0315	b0315	1	126	144	87.5	RNA001_Ecoli_TEX_replicate1
NC_000913.3	b0316	b0316	1	189	207	91.3043	RNA001_Ecoli_TEX_replicate1
NC_000913.3	b0324	b0324	1	93	101	92.0792	RNA001_Ecoli_TEX_replicate1
NC_000913.3	b0327	b0327	1	80	90	88.8889	RNA001_Ecoli_TEX_replicate1
NC_000913.3	b0328	b0328	1	45	55	81.8182	RNA001_Ecoli_TEX_replicate1
NC_000913.3	b0335	b0335	1	53	54	98.1481	RNA001_Ecoli_TEX_replicate1
NC_000913.3	b0336	b0336	1	92	116	79.3103	RNA001_Ecoli_TEX_replicate1
NC_000913.3	b0337	b0337	1	57	82	69.5122	RNA001_Ecoli_TEX_replicate1
NC_000913.3	b0345	b0345	1	221	222	99.5495	RNA001_Ecoli_TEX_replicate1
NC_000913.3	b0353	b0353	1	43	48	89.5833	RNA001_Ecoli_TEX_replicate1
NC_000913.3	b0355	b0355	1	135	189	71.4286	RNA001_Ecoli_TEX_replicate1
NC_000913.3	b0356	b0356,b0357	2	203	331	61.3293	RNA001_Ecoli_TEX_replicate1
NC_000913.3	b0356	b0356	1	76	331	22.9607	RNA001_Ecoli_TEX_replicate1
NC_000913.3	b0357	b0357	1	162	402	40.2985	RNA001_Ecoli_TEX_replicate1
NC_000913.3	b0357	b0356,b0357	2	203	402	50.4975	RNA001_Ecoli_TEX_replicate1
NC_000913.3	b0361	b0361	1	91	109	83.4862	RNA001_Ecoli_TEX_replicate1
NC_000913.3	b0369	b0369	1	146	147	99.3197	RNA001_Ecoli_TEX_replicate1
NC_000913.3	b0377	b0377	1	82	106	77.3585	RNA001_Ecoli_TEX_replicate1
NC_000913.3	b0378	b0378	1	42	66	63.6364	RNA001_Ecoli_TEX_replicate1
NC_000913.3	b0380	b0380,b0381	2	86	370	23.2432	RNA001_Ecoli_TEX_replicate1
NC_000913.3	b0380	b0380	1	284	370	76.7568	RNA001_Ecoli_TEX_replicate1
NC_000913.3	b0381	b0381	1	141	227	62.1145	RNA001_Ecoli_TEX_replicate1
NC_000913.3	b0381	b0380,b0381	2	86	227	37.8855	RNA001_Ecoli_TEX_replicate1
NC_000913.3	b0387	b0387	1	48	58	82.7586	RNA001_Ecoli_TEX_replicate1
NC_000913.3	b0388	b0388,b0389	2	51	191	26.7016	RNA001_Ecoli_TEX_replicate1
NC_000913.3	b0388	b0388	1	126	191	65.9686	RNA001_Ecoli_TEX_replicate1
NC_000913.3	b0389	b0388,b0389	2	51	86	59.3023	RNA001_Ecoli_TEX_replicate1
NC_000913.3	b0390	b0390	1	43	57	75.4386	RNA001_Ecoli_TEX_replicate1
NC_000913.3	b0391	b0391	1	118	135	87.4074	RNA001_Ecoli_TEX_replicate1
NC_000913.3	b0392	b0392	1	49	59	83.0508	RNA001_Ecoli_TEX_replicate1
NC_000913.3	b0393	b0393	1	85	86	98.8372	RNA001_Ecoli_TEX_replicate1
NC_000913.3	b0394	b0394	1	153	171	89.4737	RNA001_Ecoli_TEX_replicate1
NC_000913.3	b0396	b0396	1	361	385	93.7662	RNA001_Ecoli_TEX_replicate1
NC_000913.3	b0397	b0397	1	55	65	84.6154	RNA001_Ecoli_TEX_replicate1
NC_000913.3	b0401	b0401	1	408	438	93.1507	RNA001_Ecoli_TEX_replicate1
NC_000913.3	b0402	b0402	1	201	235	85.5319	RNA001_Ecoli_TEX_replicate1
NC_000913.3	b0403	b0403	1	65	108	60.1852	RNA001_Ecoli_TEX_replicate1
NC_000913.3	b0404	b0404	1	94	147	63.9456	RNA001_Ecoli_TEX_replicate1
NC_000913.3	b0405	b0405,b0406	2	52	442	11.7647	RNA001_Ecoli_TEX_replicate1
NC_000913.3	b0405	b0405	1	369	442	83.4842	RNA001_Ecoli_TEX_replicate1
NC_000913.3	b0406	b0406,b0407,b0408	3	202	967	20.8893	RNA001_Ecoli_TEX_replicate1
NC_000913.3	b0406	b0406,b0407	2	106	967	10.9617	RNA001_Ecoli_TEX_replicate1
NC_000913.3	b0406	b0406	1	597	967	61.7373	RNA001_Ecoli_TEX_replicate1
NC_000913.3	b0406	b0405,b0406	2	52	967	5.37746	RNA001_Ecoli_TEX_replicate1
NC_000913.3	b0407	b0407,b0408	2	150	537	27.933	RNA001_Ecoli_TEX_replicate1
NC_000913.3	b0407	b0406,b0407,b0408	3	202	537	37.6164	RNA001_Ecoli_TEX_replicate1
NC_000913.3	b0407	b0406,b0407	2	106	537	19.7393	RNA001_Ecoli_TEX_replicate1
NC_000913.3	b0407	b0407	1	59	537	10.987	RNA001_Ecoli_TEX_replicate1
NC_000913.3	b0408	b0408,b0409	2	64	751	8.52197	RNA001_Ecoli_TEX_replicate1
NC_000913.3	b0408	b0408	1	317	751	42.2104	RNA001_Ecoli_TEX_replicate1
NC_000913.3	b0408	b0407,b0408	2	150	751	19.9734	RNA001_Ecoli_TEX_replicate1
NC_000913.3	b0408	b0406,b0407,b0408	3	202	751	26.8975	RNA001_Ecoli_TEX_replicate1
NC_000913.3	b0409	b0409	1	253	338	74.8521	RNA001_Ecoli_TEX_replicate1
NC_000913.3	b0409	b0408,b0409	2	64	338	18.9349	RNA001_Ecoli_TEX_replicate1
NC_000913.3	b0411	b0411	1	612	616	99.3506	RNA001_Ecoli_TEX_replicate1
NC_000913.3	b0412	b0412	1	79	79	100	RNA001_Ecoli_TEX_replicate1
NC_000913.3	b0413	b0413	1	56	87	64.3678	RNA001_Ecoli_TEX_replicate1
NC_000913.3	b0414	b0414	1	66	105	62.8571	RNA001_Ecoli_TEX_replicate1
NC_000913.3	b0415	b0415,b0416	2	48	158	30.3797	RNA001_Ecoli_TEX_replicate1
NC_000913.3	b0415	b0415	1	97	158	61.3924	RNA001_Ecoli_TEX_replicate1
NC_000913.3	b0416	b0415,b0416	2	48	142	33.8028	RNA001_Ecoli_TEX_replicate1
NC_000913.3	b0416	b0416	1	83	142	58.4507	RNA001_Ecoli_TEX_replicate1
NC_000913.3	b0417	b0417	1	42	66	63.6364	RNA001_Ecoli_TEX_replicate1
NC_000913.3	b0418	b0418,b0419	2	93	707	13.1542	RNA001_Ecoli_TEX_replicate1
NC_000913.3	b0418	b0418	1	598	707	84.5827	RNA001_Ecoli_TEX_replicate1
NC_000913.3	b0419	b0418,b0419	2	93	137	67.8832	RNA001_Ecoli_TEX_replicate1
NC_000913.3	b0420	b0420,b0421	2	64	385	16.6234	RNA001_Ecoli_TEX_replicate1
NC_000913.3	b0420	b0420	1	294	385	76.3636	RNA001_Ecoli_TEX_replicate1
NC_000913.3	b0421	b0421,b0422	2	51	270	18.8889	RNA001_Ecoli_TEX_replicate1
NC_000913.3	b0421	b0421	1	132	270	48.8889	RNA001_Ecoli_TEX_replicate1
NC_000913.3	b0421	b0420,b0421	2	64	270	23.7037	RNA001_Ecoli_TEX_replicate1
NC_000913.3	b0422	b0422	1	287	361	79.5014	RNA001_Ecoli_TEX_replicate1
NC_000913.3	b0422	b0421,b0422	2	51	361	14.1274	RNA001_Ecoli_TEX_replicate1
NC_000913.3	b0423	b0423	1	171	179	95.5307	RNA001_Ecoli_TEX_replicate1
NC_000913.3	b0424	b0424	1	58	102	56.8627	RNA001_Ecoli_TEX_replicate1
NC_000913.3	b0426	b0426	1	505	531	95.1036	RNA001_Ecoli_TEX_replicate1
NC_000913.3	b0427	b0427	1	180	207	86.9565	RNA001_Ecoli_TEX_replicate1
NC_000913.3	b0428	b0428	1	571	603	94.6932	RNA001_Ecoli_TEX_replicate1
NC_000913.3	b0431	b0431	1	105	129	81.3953	RNA001_Ecoli_TEX_replicate1
NC_000913.3	b0433	b0433	1	1136	1164	97.5945	RNA001_Ecoli_TEX_replicate1
NC_000913.3	b0434	b0434	1	76	104	73.0769	RNA001_Ecoli_TEX_replicate1
NC_000913.3	b0435	b0435	1	301	319	94.3574	RNA001_Ecoli_TEX_replicate1
NC_000913.3	b0436	b0436	1	2915	2935	99.3186	RNA001_Ecoli_TEX_replicate1
NC_000913.3	b0437	b0437,b0438	2	61	177	34.4633	RNA001_Ecoli_TEX_replicate1
NC_000913.3	b0437	b0437	1	110	177	62.1469	RNA001_Ecoli_TEX_replicate1
NC_000913.3	b0438	b0438	1	840	921	91.2052	RNA001_Ecoli_TEX_replicate1
NC_000913.3	b0438	b0437,b0438	2	61	921	6.62324	RNA001_Ecoli_TEX_replicate1
NC_000913.3	b0439	b0439	1	564	587	96.0818	RNA001_Ecoli_TEX_replicate1
NC_000913.3	b0440	b0440,b0441	2	55	1500	3.66667	RNA001_Ecoli_TEX_replicate1
NC_000913.3	b0440	b0440	1	1440	1500	96	RNA001_Ecoli_TEX_replicate1
NC_000913.3	b0441	b0441	1	295	354	83.3333	RNA001_Ecoli_TEX_replicate1
NC_000913.3	b0441	b0440,b0441	2	55	354	15.5367	RNA001_Ecoli_TEX_replicate1
NC_000913.3	b0444	b0444	1	204	210	97.1429	RNA001_Ecoli_TEX_replicate1
NC_000913.3	b0447	b0447	1	104	120	86.6667	RNA001_Ecoli_TEX_replicate1
NC_000913.3	b0448	b0448	1	97	115	84.3478	RNA001_Ecoli_TEX_replicate1
NC_000913.3	b0449	b0449	1	129	132	97.7273	RNA001_Ecoli_TEX_replicate1
NC_000913.3	b0451	b0451	1	82	88	93.1818	RNA001_Ecoli_TEX_replicate1
NC_000913.3	b0452	b0452	1	61	66	92.4242	RNA001_Ecoli_TEX_replicate1
NC_000913.3	b0455	b0455	1	377	386	97.6684	RNA001_Ecoli_TEX_replicate1
NC_000913.3	b0457	b0457	1	61	63	96.8254	RNA001_Ecoli_TEX_replicate1
NC_000913.3	b0458	b0458	1	52	74	70.2703	RNA001_Ecoli_TEX_replicate1
NC_000913.3	b0459	b0459,b0460	2	47	210	22.381	RNA001_Ecoli_TEX_replicate1
NC_000913.3	b0459	b0459	1	137	210	65.2381	RNA001_Ecoli_TEX_replicate1
NC_000913.3	b0460	b0460	1	106	175	60.5714	RNA001_Ecoli_TEX_replicate1
NC_000913.3	b0460	b0459,b0460	2	47	175	26.8571	RNA001_Ecoli_TEX_replicate1
NC_000913.3	b0461	b0461	1	66	87	75.8621	RNA001_Ecoli_TEX_replicate1
NC_000913.3	b0462	b0462,b0463	2	55	602	9.13621	RNA001_Ecoli_TEX_replicate1
NC_000913.3	b0462	b0462	1	546	602	90.6977	RNA001_Ecoli_TEX_replicate1
NC_000913.3	b0463	b0463	1	195	255	76.4706	RNA001_Ecoli_TEX_replicate1
NC_000913.3	b0463	b0462,b0463	2	55	255	21.5686	RNA001_Ecoli_TEX_replicate1
NC_000913.3	b0464	b0464	1	89	101	88.1188	RNA001_Ecoli_TEX_replicate1
NC_000913.3	b0465	b0465	1	1369	1378	99.3469	RNA001_Ecoli_TEX_replicate1
NC_000913.3	b0468	b0468	1	63	75	84	RNA001_Ecoli_TEX_replicate1
NC_000913.3	b0469	b0469	1	241	258	93.4109	RNA001_Ecoli_TEX_replicate1
NC_000913.3	b0470	b0470,b0470,b0470,b0471,b0472	3	45	568	7.92254	RNA001_Ecoli_TEX_replicate1
NC_000913.3	b0470	b0470,b0470,b0470,b0471,b0472	3	45	568	7.92254	RNA001_Ecoli_TEX_replicate1
NC_000913.3	b0470	b0470,b0470,b0470,b0471,b0472	3	45	568	7.92254	RNA001_Ecoli_TEX_replicate1
NC_000913.3	b0470	b0470,b0470,b0470	1	501	568	88.2042	RNA001_Ecoli_TEX_replicate1
NC_000913.3	b0470	b0470,b0470,b0470	1	501	568	88.2042	RNA001_Ecoli_TEX_replicate1
NC_000913.3	b0470	b0470,b0470,b0470	1	501	568	88.2042	RNA001_Ecoli_TEX_replicate1
NC_000913.3	b0471	b0471,b0472	2	69	152	45.3947	RNA001_Ecoli_TEX_replicate1
NC_000913.3	b0471	b0470,b0470,b0470,b0471,b0472	3	45	152	29.6053	RNA001_Ecoli_TEX_replicate1
NC_000913.3	b0472	b0471,b0472	2	69	271	25.4613	RNA001_Ecoli_TEX_replicate1
NC_000913.3	b0472	b0472	1	155	271	57.1956	RNA001_Ecoli_TEX_replicate1
NC_000913.3	b0472	b0470,b0470,b0470,b0471,b0472	3	45	271	16.6052	RNA001_Ecoli_TEX_replicate1
NC_000913.3	b0473	b0473	1	468	479	97.7035	RNA001_Ecoli_TEX_replicate1
NC_000913.3	b0474	b0474	1	585	595	98.3193	RNA001_Ecoli_TEX_replicate1
NC_000913.3	b0477	b0477,b0478	2	51	784	6.5051	RNA001_Ecoli_TEX_replicate1
NC_000913.3	b0477	b0477	1	733	784	93.4949	RNA001_Ecoli_TEX_replicate1
NC_000913.3	b0478	b0478	1	882	933	94.5338	RNA001_Ecoli_TEX_replicate1
NC_000913.3	b0478	b0477,b0478	2	51	933	5.46624	RNA001_Ecoli_TEX_replicate1
NC_000913.3	b0479	b0479	1	57	58	98.2759	RNA001_Ecoli_TEX_replicate1
NC_000913.3	b0480	b0480	1	91	103	88.3495	RNA001_Ecoli_TEX_replicate1
NC_000913.3	b0482	b0482	1	59	60	98.3333	RNA001_Ecoli_TEX_replicate1
NC_000913.3	b0483	b0483	1	242	252	96.0317	RNA001_Ecoli_TEX_replicate1
NC_000913.3	b0484	b0484,b0484,b0484	1	205	215	95.3488	RNA001_Ecoli_TEX_replicate1
NC_000913.3	b0484	b0484,b0484,b0484	1	205	215	95.3488	RNA001_Ecoli_TEX_replicate1
NC_000913.3	b0484	b0484,b0484,b0484	1	205	215	95.3488	RNA001_Ecoli_TEX_replicate1
NC_000913.3	b0486	b0486	1	47	53	88.6792	RNA001_Ecoli_TEX_replicate1
NC_000913.3	b0488	b0488	1	43	78	55.1282	RNA001_Ecoli_TEX_replicate1
NC_000913.3	b0491	b0491	1	275	293	93.8567	RNA001_Ecoli_TEX_replicate1
NC_000913.3	b0492	b0492	1	162	189	85.7143	RNA001_Ecoli_TEX_replicate1
NC_000913.3	b0493	b0493	1	46	64	71.875	RNA001_Ecoli_TEX_replicate1
NC_000913.3	b0496	b0496	1	67	69	97.1014	RNA001_Ecoli_TEX_replicate1
NC_000913.3	b0497	b0497	1	182	205	88.7805	RNA001_Ecoli_TEX_replicate1
NC_000913.3	b0503	b0503	1	80	90	88.8889	RNA001_Ecoli_TEX_replicate1
NC_000913.3	b0506	b0506	1	47	47	100	RNA001_Ecoli_TEX_replicate1
NC_000913.3	b0514	b0514	1	48	48	100	RNA001_Ecoli_TEX_replicate1
NC_000913.3	b0522	b0522	1	57	74	77.027	RNA001_Ecoli_TEX_replicate1
NC_000913.3	b0524	b0524	1	91	127	71.6535	RNA001_Ecoli_TEX_replicate1
NC_000913.3	b0525	b0525	1	267	299	89.2977	RNA001_Ecoli_TEX_replicate1
NC_000913.3	b0526	b0526	1	265	277	95.6679	RNA001_Ecoli_TEX_replicate1
NC_000913.3	b0528	b0528,b0529	2	66	111	59.4595	RNA001_Ecoli_TEX_replicate1
NC_000913.3	b0528	b0528	1	42	111	37.8378	RNA001_Ecoli_TEX_replicate1
NC_000913.3	b0529	b0528,b0529	2	66	102	64.7059	RNA001_Ecoli_TEX_replicate1
NC_000913.3	b0537	b0537	1	51	87	58.6207	RNA001_Ecoli_TEX_replicate1
NC_000913.3	b0543	b0543	1	73	88	82.9545	RNA001_Ecoli_TEX_replicate1
NC_000913.3	b0552	b0552,b0553,b0553	2	386	636	60.6918	RNA001_Ecoli_TEX_replicate1
NC_000913.3	b0552	b0552	1	250	636	39.3082	RNA001_Ecoli_TEX_replicate1
NC_000913.3	b0553	b0553,b0553	1	711	1097	64.8131	RNA001_Ecoli_TEX_replicate1
NC_000913.3	b0553	b0553,b0553	1	711	1097	64.8131	RNA001_Ecoli_TEX_replicate1
NC_000913.3	b0553	b0552,b0553,b0553	2	386	1097	35.1869	RNA001_Ecoli_TEX_replicate1
NC_000913.3	b0553	b0552,b0553,b0553	2	386	1097	35.1869	RNA001_Ecoli_TEX_replicate1
NC_000913.3	b0555	b0555	1	59	63	93.6508	RNA001_Ecoli_TEX_replicate1
NC_000913.3	b0556	b0556,b0557	2	92	152	60.5263	RNA001_Ecoli_TEX_replicate1
NC_000913.3	b0556	b0556,b0557,b4510	3	50	152	32.8947	RNA001_Ecoli_TEX_replicate1
NC_000913.3	b0557	b0557	1	88	231	38.0952	RNA001_Ecoli_TEX_replicate1
NC_000913.3	b0557	b0556,b0557	2	92	231	39.8268	RNA001_Ecoli_TEX_replicate1
NC_000913.3	b0557	b0556,b0557,b4510	3	50	231	21.645	RNA001_Ecoli_TEX_replicate1
NC_000913.3	b0564	b0564	1	178	183	97.2678	RNA001_Ecoli_TEX_replicate1
NC_000913.3	b0565	b0565	1	567	571	99.2995	RNA001_Ecoli_TEX_replicate1
NC_000913.3	b0567	b0567	1	52	59	88.1356	RNA001_Ecoli_TEX_replicate1
NC_000913.3	b0568	b0568	1	169	182	92.8571	RNA001_Ecoli_TEX_replicate1
NC_000913.3	b0569	b0569	1	138	144	95.8333	RNA001_Ecoli_TEX_replicate1
NC_000913.3	b0571	b0571	1	146	165	88.4848	RNA001_Ecoli_TEX_replicate1
NC_000913.3	b0575	b0575	1	64	66	96.9697	RNA001_Ecoli_TEX_replicate1
NC_000913.3	b0576	b0576	1	391	398	98.2412	RNA001_Ecoli_TEX_replicate1
NC_000913.3	b0577	b0577	1	176	189	93.1217	RNA001_Ecoli_TEX_replicate1
NC_000913.3	b0578	b0578	1	187	198	94.4444	RNA001_Ecoli_TEX_replicate1
NC_000913.3	b0584	b0584	1	159	165	96.3636	RNA001_Ecoli_TEX_replicate1
NC_000913.3	b0598	b0598	1	128	140	91.4286	RNA001_Ecoli_TEX_replicate1
NC_000913.3	b0599	b0599	1	145	168	86.3095	RNA001_Ecoli_TEX_replicate1
NC_000913.3	b0604	b0604	1	43	43	100	RNA001_Ecoli_TEX_replicate1
NC_000913.3	b0605	b0605	1	1110	1125	98.6667	RNA001_Ecoli_TEX_replicate1
NC_000913.3	b0606	b0606	1	197	213	92.4883	RNA001_Ecoli_TEX_replicate1
NC_000913.3	b0607	b0607	1	133	134	99.2537	RNA001_Ecoli_TEX_replicate1
NC_000913.3	b0610	b0610	1	377	381	98.9501	RNA001_Ecoli_TEX_replicate1
NC_000913.3	b0611	b0611	1	77	82	93.9024	RNA001_Ecoli_TEX_replicate1
NC_000913.3	b0612	b0612	1	46	48	95.8333	RNA001_Ecoli_TEX_replicate1
NC_000913.3	b0619	b0619	1	196	209	93.7799	RNA001_Ecoli_TEX_replicate1
NC_000913.3	b0621	b0621	1	168	187	89.8396	RNA001_Ecoli_TEX_replicate1
NC_000913.3	b0623	b0623	1	918	923	99.4583	RNA001_Ecoli_TEX_replicate1
NC_000913.3	b0627	b0627	1	130	134	97.0149	RNA001_Ecoli_TEX_replicate1
NC_000913.3	b0628	b0628	1	527	529	99.6219	RNA001_Ecoli_TEX_replicate1
NC_000913.3	b0630	b0630	1	51	51	100	RNA001_Ecoli_TEX_replicate1
NC_000913.3	b0631	b0631	1	257	257	100	RNA001_Ecoli_TEX_replicate1
NC_000913.3	b0632	b0632	1	228	242	94.2149	RNA001_Ecoli_TEX_replicate1
NC_000913.3	b0633	b0633	1	634	687	92.2853	RNA001_Ecoli_TEX_replicate1
NC_000913.3	b0634	b0634	1	269	323	83.2817	RNA001_Ecoli_TEX_replicate1
NC_000913.3	b0635	b0635	1	334	382	87.4346	RNA001_Ecoli_TEX_replicate1
NC_000913.3	b0636	b0636,b0637	2	61	176	34.6591	RNA001_Ecoli_TEX_replicate1
NC_000913.3	b0636	b0636	1	80	176	45.4545	RNA001_Ecoli_TEX_replicate1
NC_000913.3	b0637	b0636,b0637	2	61	130	46.9231	RNA001_Ecoli_TEX_replicate1
NC_000913.3	b0637	b0637	1	49	130	37.6923	RNA001_Ecoli_TEX_replicate1
NC_000913.3	b0640	b0640	1	121	152	79.6053	RNA001_Ecoli_TEX_replicate1
NC_000913.3	b0641	b0641,b0642	2	60	182	32.967	RNA001_Ecoli_TEX_replicate1
NC_000913.3	b0641	b0641	1	100	182	54.9451	RNA001_Ecoli_TEX_replicate1
NC_000913.3	b0642	b0642	1	420	494	85.0202	RNA001_Ecoli_TEX_replicate1
NC_000913.3	b0642	b0641,b0642	2	60	494	12.1457	RNA001_Ecoli_TEX_replicate1
NC_000913.3	b0651	b0651	1	64	64	100	RNA001_Ecoli_TEX_replicate1
NC_000913.3	b0656	b0656	1	74	84	88.0952	RNA001_Ecoli_TEX_replicate1
NC_000913.3	b0657	b0657	1	193	200	96.5	RNA001_Ecoli_TEX_replicate1
NC_000913.3	b0658	b0658	1	73	91	80.2198	RNA001_Ecoli_TEX_replicate1
NC_000913.3	b0660	b0660	1	62	95	65.2632	RNA001_Ecoli_TEX_replicate1
NC_000913.3	b0661	b0661	1	274	278	98.5612	RNA001_Ecoli_TEX_replicate1
NC_000913.3	b0662	b0662	1	215	215	100	RNA001_Ecoli_TEX_replicate1
NC_000913.3	b0674	b0674	1	60	60	100	RNA001_Ecoli_TEX_replicate1
NC_000913.3	b0675	b0675	1	105	116	90.5172	RNA001_Ecoli_TEX_replicate1
NC_000913.3	b0676	b0676	1	98	132	74.2424	RNA001_Ecoli_TEX_replicate1
NC_000913.3	b0677	b0677	1	53	87	60.9195	RNA001_Ecoli_TEX_replicate1
NC_000913.3	b0678	b0678	1	52	66	78.7879	RNA001_Ecoli_TEX_replicate1
NC_000913.3	b0679	b0679	1	94	95	98.9474	RNA001_Ecoli_TEX_replicate1
NC_000913.3	b0680	b0680	1	184	184	100	RNA001_Ecoli_TEX_replicate1
NC_000913.3	b0681	b0681	1	101	101	100	RNA001_Ecoli_TEX_replicate1
NC_000913.3	b0682	b0682	1	51	53	96.2264	RNA001_Ecoli_TEX_replicate1
NC_000913.3	b0683	b0683	1	131	142	92.2535	RNA001_Ecoli_TEX_replicate1
NC_000913.3	b0684	b0684	1	185	197	93.9086	RNA001_Ecoli_TEX_replicate1
NC_000913.3	b0686	b0686	1	55	59	93.2203	RNA001_Ecoli_TEX_replicate1
NC_000913.3	b0687	b0687,b0688	2	57	209	27.2727	RNA001_Ecoli_TEX_replicate1
NC_000913.3	b0687	b0687	1	152	209	72.7273	RNA001_Ecoli_TEX_replicate1
NC_000913.3	b0688	b0688	1	294	351	83.7607	RNA001_Ecoli_TEX_replicate1
NC_000913.3	b0688	b0687,b0688	2	57	351	16.2393	RNA001_Ecoli_TEX_replicate1
NC_000913.3	b0692	b0692	1	56	56	100	RNA001_Ecoli_TEX_replicate1
NC_000913.3	b0695	b0695	1	255	279	91.3978	RNA001_Ecoli_TEX_replicate1
NC_000913.3	b0696	b0696	1	67	87	77.0115	RNA001_Ecoli_TEX_replicate1
NC_000913.3	b0700	b0700	1	149	150	99.3333	RNA001_Ecoli_TEX_replicate1
NC_000913.3	b0708	b0708	1	43	47	91.4894	RNA001_Ecoli_TEX_replicate1
NC_000913.3	b0709	b0709	1	66	71	92.9577	RNA001_Ecoli_TEX_replicate1
NC_000913.3	b0710	b0710,b0711	2	48	213	22.5352	RNA001_Ecoli_TEX_replicate1
NC_000913.3	b0710	b0710	1	149	213	69.9531	RNA001_Ecoli_TEX_replicate1
NC_000913.3	b0711	b0710,b0711	2	48	88	54.5455	RNA001_Ecoli_TEX_replicate1
NC_000913.3	b0713	b0713	1	47	67	70.1493	RNA001_Ecoli_TEX_replicate1
NC_000913.3	b0715	b0715	1	142	161	88.1988	RNA001_Ecoli_TEX_replicate1
NC_000913.3	b0720	b0720	1	178	181	98.3425	RNA001_Ecoli_TEX_replicate1
NC_000913.3	b0726	b0726	1	91	97	93.8144	RNA001_Ecoli_TEX_replicate1
NC_000913.3	b0729	b0729	1	75	92	81.5217	RNA001_Ecoli_TEX_replicate1
NC_000913.3	b0733	b0733	1	2162	2220	97.3874	RNA001_Ecoli_TEX_replicate1
NC_000913.3	b0734	b0734,b4515	2	83	354	23.4463	RNA001_Ecoli_TEX_replicate1
NC_000913.3	b0734	b0734	1	194	354	54.8023	RNA001_Ecoli_TEX_replicate1
NC_000913.3	b0735	b0735	1	45	72	62.5	RNA001_Ecoli_TEX_replicate1
NC_000913.3	b0736	b0736	1	133	172	77.3256	RNA001_Ecoli_TEX_replicate1
NC_000913.3	b0738	b0738	1	45	79	56.962	RNA001_Ecoli_TEX_replicate1
NC_000913.3	b0739	b0739	1	102	149	68.4564	RNA001_Ecoli_TEX_replicate1
NC_000913.3	b0740	b0740	1	332	398	83.4171	RNA001_Ecoli_TEX_replicate1
NC_000913.3	b0741	b0741,b0742	2	53	329	16.1094	RNA001_Ecoli_TEX_replicate1
NC_000913.3	b0741	b0741	1	227	329	68.997	RNA001_Ecoli_TEX_replicate1
NC_000913.3	b0742	b0742	1	244	317	76.9716	RNA001_Ecoli_TEX_replicate1
NC_000913.3	b0742	b0741,b0742	2	53	317	16.7192	RNA001_Ecoli_TEX_replicate1
NC_000913.3	b0754	b0754	1	262	264	99.2424	RNA001_Ecoli_TEX_replicate1
NC_000913.3	b0755	b0755	1	90	97	92.7835	RNA001_Ecoli_TEX_replicate1
NC_000913.3	b0756	b0756,b0757	2	286	372	76.8817	RNA001_Ecoli_TEX_replicate1
NC_000913.3	b0756	b0756	1	77	372	20.6989	RNA001_Ecoli_TEX_replicate1
NC_000913.3	b0757	b0757	1	101	404	25	RNA001_Ecoli_TEX_replicate1
NC_000913.3	b0757	b0756,b0757	2	286	404	70.7921	RNA001_Ecoli_TEX_replicate1
NC_000913.3	b0760	b0760,b0761	2	55	100	55	RNA001_Ecoli_TEX_replicate1
NC_000913.3	b0760	b0760	1	45	100	45	RNA001_Ecoli_TEX_replicate1
NC_000913.3	b0761	b0761	1	65	120	54.1667	RNA001_Ecoli_TEX_replicate1
NC_000913.3	b0761	b0760,b0761	2	55	120	45.8333	RNA001_Ecoli_TEX_replicate1
NC_000913.3	b0763	b0763	1	45	67	67.1642	RNA001_Ecoli_TEX_replicate1
NC_000913.3	b0764	b0764	1	61	100	61	RNA001_Ecoli_TEX_replicate1
NC_000913.3	b0765	b0765	1	63	100	63	RNA001_Ecoli_TEX_replicate1
NC_000913.3	b0767	b0767	1	123	140	87.8571	RNA001_Ecoli_TEX_replicate1
NC_000913.3	b0771	b0771	1	56	61	91.8033	RNA001_Ecoli_TEX_replicate1
NC_000913.3	b0772	b0772	1	135	140	96.4286	RNA001_Ecoli_TEX_replicate1
NC_000913.3	b0779	b0779	1	85	93	91.3978	RNA001_Ecoli_TEX_replicate1
NC_000913.3	b0780	b0780	1	199	207	96.1353	RNA001_Ecoli_TEX_replicate1
NC_000913.3	b0781	b0781	1	180	219	82.1918	RNA001_Ecoli_TEX_replicate1
NC_000913.3	b0785	b0785	1	66	116	56.8966	RNA001_Ecoli_TEX_replicate1
NC_000913.3	b0786	b0786	1	51	54	94.4444	RNA001_Ecoli_TEX_replicate1
NC_000913.3	b0791	b0791	1	162	192	84.375	RNA001_Ecoli_TEX_replicate1
NC_000913.3	b0794	b0794	1	138	164	84.1463	RNA001_Ecoli_TEX_replicate1
NC_000913.3	b0797	b0797	1	178	182	97.8022	RNA001_Ecoli_TEX_replicate1
NC_000913.3	b0799	b0799	1	140	156	89.7436	RNA001_Ecoli_TEX_replicate1
NC_000913.3	b0800	b0800	1	53	71	74.6479	RNA001_Ecoli_TEX_replicate1
NC_000913.3	b0802	b0802	1	151	153	98.6928	RNA001_Ecoli_TEX_replicate1
NC_000913.3	b0807	b0807,b0808	2	53	243	21.8107	RNA001_Ecoli_TEX_replicate1
NC_000913.3	b0807	b0807	1	189	243	77.7778	RNA001_Ecoli_TEX_replicate1
NC_000913.3	b0808	b0808	1	105	158	66.4557	RNA001_Ecoli_TEX_replicate1
NC_000913.3	b0808	b0807,b0808	2	53	158	33.5443	RNA001_Ecoli_TEX_replicate1
NC_000913.3	b0809	b0809,b0810	2	44	281	15.6584	RNA001_Ecoli_TEX_replicate1
NC_000913.3	b0809	b0809	1	201	281	71.5302	RNA001_Ecoli_TEX_replicate1
NC_000913.3	b0810	b0810,b0811	2	73	210	34.7619	RNA001_Ecoli_TEX_replicate1
NC_000913.3	b0810	b0810	1	57	210	27.1429	RNA001_Ecoli_TEX_replicate1
NC_000913.3	b0810	b0809,b0810	2	44	210	20.9524	RNA001_Ecoli_TEX_replicate1
NC_000913.3	b0811	b0811	1	525	634	82.8076	RNA001_Ecoli_TEX_replicate1
NC_000913.3	b0811	b0810,b0811	2	73	634	11.5142	RNA001_Ecoli_TEX_replicate1
NC_000913.3	b0812	b0812	1	202	202	100	RNA001_Ecoli_TEX_replicate1
NC_000913.3	b0813	b0813	1	82	82	100	RNA001_Ecoli_TEX_replicate1
NC_000913.3	b0814	b0814	1	1878	1905	98.5827	RNA001_Ecoli_TEX_replicate1
NC_000913.3	b0815	b0815	1	135	162	83.3333	RNA001_Ecoli_TEX_replicate1
NC_000913.3	b0818	b0818	1	52	61	85.2459	RNA001_Ecoli_TEX_replicate1
NC_000913.3	b0819	b0819	1	157	158	99.3671	RNA001_Ecoli_TEX_replicate1
NC_000913.3	b0820	b0820	1	293	296	98.9865	RNA001_Ecoli_TEX_replicate1
NC_000913.3	b0822	b0822	1	116	119	97.479	RNA001_Ecoli_TEX_replicate1
NC_000913.3	b0823	b0823	1	47	49	95.9184	RNA001_Ecoli_TEX_replicate1
NC_000913.3	b0826	b0826	1	188	232	81.0345	RNA001_Ecoli_TEX_replicate1
NC_000913.3	b0827	b0827	1	51	76	67.1053	RNA001_Ecoli_TEX_replicate1
NC_000913.3	b0829	b0829	1	66	83	79.5181	RNA001_Ecoli_TEX_replicate1
NC_000913.3	b0832	b0832	1	46	50	92	RNA001_Ecoli_TEX_replicate1
NC_000913.3	b0833	b0833	1	64	68	94.1176	RNA001_Ecoli_TEX_replicate1
NC_000913.3	b0835	b0835	1	71	73	97.2603	RNA001_Ecoli_TEX_replicate1
NC_000913.3	b0836	b0836	1	143	149	95.9732	RNA001_Ecoli_TEX_replicate1
NC_000913.3	b0838	b0838	1	44	48	91.6667	RNA001_Ecoli_TEX_replicate1
NC_000913.3	b0840	b0840,b0841	2	54	241	22.4066	RNA001_Ecoli_TEX_replicate1
NC_000913.3	b0840	b0840	1	180	241	74.6888	RNA001_Ecoli_TEX_replicate1
NC_000913.3	b0841	b0841	1	215	270	79.6296	RNA001_Ecoli_TEX_replicate1
NC_000913.3	b0841	b0840,b0841	2	54	270	20	RNA001_Ecoli_TEX_replicate1
NC_000913.3	b0842	b0842	1	139	159	87.4214	RNA001_Ecoli_TEX_replicate1
NC_000913.3	b0847	b0847	1	444	446	99.5516	RNA001_Ecoli_TEX_replicate1
NC_000913.3	b0848	b0848	1	80	86	93.0233	RNA001_Ecoli_TEX_replicate1
NC_000913.3	b0850	b0850	1	104	140	74.2857	RNA001_Ecoli_TEX_replicate1
NC_000913.3	b0851	b0851	1	90	164	54.878	RNA001_Ecoli_TEX_replicate1
NC_000913.3	b0852	b0852	1	299	383	78.0679	RNA001_Ecoli_TEX_replicate1
NC_000913.3	b0853	b0853	1	248	287	86.4111	RNA001_Ecoli_TEX_replicate1
NC_000913.3	b0858	b0858	1	49	60	81.6667	RNA001_Ecoli_TEX_replicate1
NC_000913.3	b0859	b0859	1	66	77	85.7143	RNA001_Ecoli_TEX_replicate1
NC_000913.3	b0861	b0861	1	59	80	73.75	RNA001_Ecoli_TEX_replicate1
NC_000913.3	b0862	b0862	1	46	70	65.7143	RNA001_Ecoli_TEX_replicate1
NC_000913.3	b0864	b0864	1	47	61	77.0492	RNA001_Ecoli_TEX_replicate1
NC_000913.3	b0866	b0866,b0867	2	46	96	47.9167	RNA001_Ecoli_TEX_replicate1
NC_000913.3	b0866	b0866	1	45	96	46.875	RNA001_Ecoli_TEX_replicate1
NC_000913.3	b0867	b0866,b0867	2	46	95	48.4211	RNA001_Ecoli_TEX_replicate1
NC_000913.3	b0868	b0868	1	61	85	71.7647	RNA001_Ecoli_TEX_replicate1
NC_000913.3	b0870	b0870	1	47	67	70.1493	RNA001_Ecoli_TEX_replicate1
NC_000913.3	b0872	b0872	1	69	84	82.1429	RNA001_Ecoli_TEX_replicate1
NC_000913.3	b0874	b0874	1	75	75	100	RNA001_Ecoli_TEX_replicate1
NC_000913.3	b0875	b0875	1	87	87	100	RNA001_Ecoli_TEX_replicate1
NC_000913.3	b0876	b0876,b0877	2	57	118	48.3051	RNA001_Ecoli_TEX_replicate1
NC_000913.3	b0876	b0876	1	61	118	51.6949	RNA001_Ecoli_TEX_replicate1
NC_000913.3	b0877	b0877	1	225	284	79.2254	RNA001_Ecoli_TEX_replicate1
NC_000913.3	b0877	b0876,b0877	2	57	284	20.0704	RNA001_Ecoli_TEX_replicate1
NC_000913.3	b0879	b0879	1	162	169	95.858	RNA001_Ecoli_TEX_replicate1
NC_000913.3	b0880	b0880	1	61	83	73.494	RNA001_Ecoli_TEX_replicate1
NC_000913.3	b0881	b0881,b0882	2	55	147	37.415	RNA001_Ecoli_TEX_replicate1
NC_000913.3	b0881	b0881	1	71	147	48.2993	RNA001_Ecoli_TEX_replicate1
NC_000913.3	b0882	b0882	1	377	444	84.9099	RNA001_Ecoli_TEX_replicate1
NC_000913.3	b0882	b0881,b0882	2	55	444	12.3874	RNA001_Ecoli_TEX_replicate1
NC_000913.3	b0884	b0884	1	841	842	99.8812	RNA001_Ecoli_TEX_replicate1
NC_000913.3	b0885	b0885	1	127	150	84.6667	RNA001_Ecoli_TEX_replicate1
NC_000913.3	b0886	b0886	1	72	101	71.2871	RNA001_Ecoli_TEX_replicate1
NC_000913.3	b0887	b0887	1	328	335	97.9104	RNA001_Ecoli_TEX_replicate1
NC_000913.3	b0888	b0888	1	160	160	100	RNA001_Ecoli_TEX_replicate1
NC_000913.3	b0889	b0889,b0890	2	81	855	9.47368	RNA001_Ecoli_TEX_replicate1
NC_000913.3	b0889	b0889	1	774	855	90.5263	RNA001_Ecoli_TEX_replicate1
NC_000913.3	b0890	b0890	1	521	638	81.6614	RNA001_Ecoli_TEX_replicate1
NC_000913.3	b0890	b0889,b0890	2	81	638	12.6959	RNA001_Ecoli_TEX_replicate1
NC_000913.3	b0892	b0892	1	88	109	80.7339	RNA001_Ecoli_TEX_replicate1
NC_000913.3	b0893	b0893	1	1162	1171	99.2314	RNA001_Ecoli_TEX_replicate1
NC_000913.3	b0894	b0894	1	333	355	93.8028	RNA001_Ecoli_TEX_replicate1
NC_000913.3	b0896	b0896	1	88	113	77.8761	RNA001_Ecoli_TEX_replicate1
NC_000913.3	b0898	b0898	1	142	143	99.3007	RNA001_Ecoli_TEX_replicate1
NC_000913.3	b0902	b0902	1	115	116	99.1379	RNA001_Ecoli_TEX_replicate1
NC_000913.3	b0903	b0903,b0904	2	398	2027	19.6349	RNA001_Ecoli_TEX_replicate1
NC_000913.3	b0903	b0903	1	1629	2027	80.3651	RNA001_Ecoli_TEX_replicate1
NC_000913.3	b0904	b0904	1	2342	2742	85.4121	RNA001_Ecoli_TEX_replicate1
NC_000913.3	b0904	b0903,b0904	2	398	2742	14.515	RNA001_Ecoli_TEX_replicate1
NC_000913.3	b0905	b0905	1	116	118	98.3051	RNA001_Ecoli_TEX_replicate1
NC_000913.3	b0907	b0907	1	432	457	94.5295	RNA001_Ecoli_TEX_replicate1
NC_000913.3	b0908	b0908	1	247	271	91.1439	RNA001_Ecoli_TEX_replicate1
NC_000913.3	b0910	b0910,b0911	2	796	2020	39.4059	RNA001_Ecoli_TEX_replicate1
NC_000913.3	b0910	b0910	1	1204	2020	59.604	RNA001_Ecoli_TEX_replicate1
NC_000913.3	b0911	b0911,b0912	2	163	5769	2.82545	RNA001_Ecoli_TEX_replicate1
NC_000913.3	b0911	b0911	1	4790	5769	83.03	RNA001_Ecoli_TEX_replicate1
NC_000913.3	b0911	b0910,b0911	2	796	5769	13.7979	RNA001_Ecoli_TEX_replicate1
NC_000913.3	b0912	b0911,b0912	2	163	320	50.9375	RNA001_Ecoli_TEX_replicate1
NC_000913.3	b0912	b0912	1	137	320	42.8125	RNA001_Ecoli_TEX_replicate1
NC_000913.3	b0913	b0913	1	70	70	100	RNA001_Ecoli_TEX_replicate1
NC_000913.3	b0914	b0914	1	87	108	80.5556	RNA001_Ecoli_TEX_replicate1
NC_000913.3	b0915	b0915,b0916	2	51	265	19.2453	RNA001_Ecoli_TEX_replicate1
NC_000913.3	b0915	b0915	1	192	265	72.4528	RNA001_Ecoli_TEX_replicate1
NC_000913.3	b0916	b0915,b0916	2	51	81	62.963	RNA001_Ecoli_TEX_replicate1
NC_000913.3	b0917	b0917,b0918	2	48	76	63.1579	RNA001_Ecoli_TEX_replicate1
NC_000913.3	b0918	b0917,b0918	2	48	187	25.6684	RNA001_Ecoli_TEX_replicate1
NC_000913.3	b0918	b0918	1	136	187	72.7273	RNA001_Ecoli_TEX_replicate1
NC_000913.3	b0921	b0921,b0922	2	82	386	21.2435	RNA001_Ecoli_TEX_replicate1
NC_000913.3	b0921	b0921	1	302	386	78.2383	RNA001_Ecoli_TEX_replicate1
NC_000913.3	b0922	b0922	1	101	211	47.8673	RNA001_Ecoli_TEX_replicate1
NC_000913.3	b0922	b0921,b0922	2	82	211	38.8626	RNA001_Ecoli_TEX_replicate1
NC_000913.3	b0924	b0924	1	1140	1164	97.9381	RNA001_Ecoli_TEX_replicate1
NC_000913.3	b0925	b0925	1	67	79	84.8101	RNA001_Ecoli_TEX_replicate1
NC_000913.3	b0926	b0926,b0927	2	59	167	35.3293	RNA001_Ecoli_TEX_replicate1
NC_000913.3	b0926	b0926	1	104	167	62.2754	RNA001_Ecoli_TEX_replicate1
NC_000913.3	b0927	b0927	1	188	274	68.6131	RNA001_Ecoli_TEX_replicate1
NC_000913.3	b0927	b0926,b0927	2	59	274	21.5328	RNA001_Ecoli_TEX_replicate1
NC_000913.3	b0928	b0928	1	852	879	96.9283	RNA001_Ecoli_TEX_replicate1
NC_000913.3	b0929	b0929	1	858	860	99.7674	RNA001_Ecoli_TEX_replicate1
NC_000913.3	b0930	b0930	1	650	657	98.9346	RNA001_Ecoli_TEX_replicate1
NC_000913.3	b0931	b0931	1	745	751	99.2011	RNA001_Ecoli_TEX_replicate1
NC_000913.3	b0932	b0932	1	228	233	97.8541	RNA001_Ecoli_TEX_replicate1
NC_000913.3	b0945	b0945	1	410	424	96.6981	RNA001_Ecoli_TEX_replicate1
NC_000913.3	b0946	b0946	1	96	129	74.4186	RNA001_Ecoli_TEX_replicate1
NC_000913.3	b0947	b0947	1	57	85	67.0588	RNA001_Ecoli_TEX_replicate1
NC_000913.3	b0948	b0948	1	348	379	91.8206	RNA001_Ecoli_TEX_replicate1
NC_000913.3	b0949	b0949	1	163	204	79.902	RNA001_Ecoli_TEX_replicate1
NC_000913.3	b0950	b0950	1	237	265	89.434	RNA001_Ecoli_TEX_replicate1
NC_000913.3	b0951	b0951	1	57	78	73.0769	RNA001_Ecoli_TEX_replicate1
NC_000913.3	b0953	b0953	1	71	80	88.75	RNA001_Ecoli_TEX_replicate1
NC_000913.3	b0954	b0954	1	323	349	92.5501	RNA001_Ecoli_TEX_replicate1
NC_000913.3	b0955	b0955	1	50	69	72.4638	RNA001_Ecoli_TEX_replicate1
NC_000913.3	b0957	b0957	1	979	979	100	RNA001_Ecoli_TEX_replicate1
NC_000913.3	b0960	b0960	1	140	161	86.9565	RNA001_Ecoli_TEX_replicate1
NC_000913.3	b0961	b0961	1	112	131	85.4962	RNA001_Ecoli_TEX_replicate1
NC_000913.3	b0962	b0962,b0963	2	58	143	40.5594	RNA001_Ecoli_TEX_replicate1
NC_000913.3	b0962	b0962	1	85	143	59.4406	RNA001_Ecoli_TEX_replicate1
NC_000913.3	b0963	b0962,b0963	2	58	625	9.28	RNA001_Ecoli_TEX_replicate1
NC_000913.3	b0963	b0963	1	567	625	90.72	RNA001_Ecoli_TEX_replicate1
NC_000913.3	b0967	b0967	1	170	190	89.4737	RNA001_Ecoli_TEX_replicate1
NC_000913.3	b0969	b0969	1	56	65	86.1538	RNA001_Ecoli_TEX_replicate1
NC_000913.3	b0970	b0970	1	228	228	100	RNA001_Ecoli_TEX_replicate1
NC_000913.3	b0975	b0975	1	55	68	80.8824	RNA001_Ecoli_TEX_replicate1
NC_000913.3	b0979	b0979	1	49	51	96.0784	RNA001_Ecoli_TEX_replicate1
NC_000913.3	b0981	b0981	1	105	110	95.4545	RNA001_Ecoli_TEX_replicate1
NC_000913.3	b0990	b0990,b4723	2	163	384	42.4479	RNA001_Ecoli_TEX_replicate1
NC_000913.3	b0990	b0990	1	217	384	56.5104	RNA001_Ecoli_TEX_replicate1
NC_000913.3	b0993	b0993	1	53	53	100	RNA001_Ecoli_TEX_replicate1
NC_000913.3	b1006	b1006	1	51	53	96.2264	RNA001_Ecoli_TEX_replicate1
NC_000913.3	b1014	b1014	1	53	74	71.6216	RNA001_Ecoli_TEX_replicate1
NC_000913.3	b1015	b1015	1	240	240	100	RNA001_Ecoli_TEX_replicate1
NC_000913.3	b1024	b1024	1	51	51	100	RNA001_Ecoli_TEX_replicate1
NC_000913.3	b1034	b1034	1	45	78	57.6923	RNA001_Ecoli_TEX_replicate1
NC_000913.3	b1036	b1036	1	300	314	95.5414	RNA001_Ecoli_TEX_replicate1
NC_000913.3	b1047	b1047	1	95	96	98.9583	RNA001_Ecoli_TEX_replicate1
NC_000913.3	b1048	b1048	1	189	216	87.5	RNA001_Ecoli_TEX_replicate1
NC_000913.3	b1049	b1049	1	464	495	93.7374	RNA001_Ecoli_TEX_replicate1
NC_000913.3	b1055	b1055	1	112	112	100	RNA001_Ecoli_TEX_replicate1
NC_000913.3	b1059	b1059	1	52	63	82.5397	RNA001_Ecoli_TEX_replicate1
NC_000913.3	b1060	b1060	1	428	438	97.7169	RNA001_Ecoli_TEX_replicate1
NC_000913.3	b1061	b1061	1	45	50	90	RNA001_Ecoli_TEX_replicate1
NC_000913.3	b1062	b1062	1	178	187	95.1872	RNA001_Ecoli_TEX_replicate1
NC_000913.3	b1063	b1063	1	105	114	92.1053	RNA001_Ecoli_TEX_replicate1
NC_000913.3	b1065	b1065	1	44	44	100	RNA001_Ecoli_TEX_replicate1
NC_000913.3	b1068	b1068	1	62	82	75.6098	RNA001_Ecoli_TEX_replicate1
NC_000913.3	b1069	b1069	1	126	143	88.1119	RNA001_Ecoli_TEX_replicate1
NC_000913.3	b1072	b1072	1	705	757	93.1308	RNA001_Ecoli_TEX_replicate1
NC_000913.3	b1073	b1073	1	46	72	63.8889	RNA001_Ecoli_TEX_replicate1
NC_000913.3	b1076	b1076	1	71	118	60.1695	RNA001_Ecoli_TEX_replicate1
NC_000913.3	b1077	b1077	1	59	103	57.2816	RNA001_Ecoli_TEX_replicate1
NC_000913.3	b1078	b1078	1	57	79	72.1519	RNA001_Ecoli_TEX_replicate1
NC_000913.3	b1079	b1079	1	53	70	75.7143	RNA001_Ecoli_TEX_replicate1
NC_000913.3	b1080	b1080	1	159	180	88.3333	RNA001_Ecoli_TEX_replicate1
NC_000913.3	b1082	b1082	1	72	83	86.747	RNA001_Ecoli_TEX_replicate1
NC_000913.3	b1084	b1084,b1085	2	83	562	14.7687	RNA001_Ecoli_TEX_replicate1
NC_000913.3	b1084	b1084	1	478	562	85.0534	RNA001_Ecoli_TEX_replicate1
NC_000913.3	b1085	b1084,b1085	2	83	83	100	RNA001_Ecoli_TEX_replicate1
NC_000913.3	b1086	b1086	1	212	230	92.1739	RNA001_Ecoli_TEX_replicate1
NC_000913.3	b1088	b1088,b1089,b1090	3	92	1552	5.92784	RNA001_Ecoli_TEX_replicate1
NC_000913.3	b1088	b1088,b1089	2	788	1552	50.7732	RNA001_Ecoli_TEX_replicate1
NC_000913.3	b1088	b1088	1	624	1552	40.2062	RNA001_Ecoli_TEX_replicate1
NC_000913.3	b1089	b1088,b1089,b1090	3	92	1633	5.6338	RNA001_Ecoli_TEX_replicate1
NC_000913.3	b1089	b1089	1	708	1633	43.3558	RNA001_Ecoli_TEX_replicate1
NC_000913.3	b1089	b1088,b1089	2	788	1633	48.2547	RNA001_Ecoli_TEX_replicate1
NC_000913.3	b1090	b1090,b1091	2	108	568	19.0141	RNA001_Ecoli_TEX_replicate1
NC_000913.3	b1090	b1090	1	326	568	57.3944	RNA001_Ecoli_TEX_replicate1
NC_000913.3	b1090	b1088,b1089,b1090	3	92	568	16.1972	RNA001_Ecoli_TEX_replicate1
NC_000913.3	b1091	b1091,b1092	2	49	436	11.2385	RNA001_Ecoli_TEX_replicate1
NC_000913.3	b1091	b1091	1	243	436	55.7339	RNA001_Ecoli_TEX_replicate1
NC_000913.3	b1091	b1090,b1091	2	108	436	24.7706	RNA001_Ecoli_TEX_replicate1
NC_000913.3	b1092	b1092,b1093,b1094	3	59	683	8.63836	RNA001_Ecoli_TEX_replicate1
NC_000913.3	b1092	b1092,b1093	2	96	683	14.0556	RNA001_Ecoli_TEX_replicate1
NC_000913.3	b1092	b1092	1	439	683	64.2753	RNA001_Ecoli_TEX_replicate1
NC_000913.3	b1092	b1091,b1092	2	49	683	7.17423	RNA001_Ecoli_TEX_replicate1
NC_000913.3	b1093	b1093,b1094	2	413	916	45.0873	RNA001_Ecoli_TEX_replicate1
NC_000913.3	b1093	b1092,b1093,b1094	3	59	916	6.44105	RNA001_Ecoli_TEX_replicate1
NC_000913.3	b1093	b1093	1	305	916	33.2969	RNA001_Ecoli_TEX_replicate1
NC_000913.3	b1093	b1092,b1093	2	96	916	10.4803	RNA001_Ecoli_TEX_replicate1
NC_000913.3	b1094	b1094,b1095	2	393	3086	12.7349	RNA001_Ecoli_TEX_replicate1
NC_000913.3	b1094	b1094	1	2189	3086	70.9332	RNA001_Ecoli_TEX_replicate1
NC_000913.3	b1094	b1093,b1094	2	413	3086	13.383	RNA001_Ecoli_TEX_replicate1
NC_000913.3	b1094	b1092,b1093,b1094	3	59	3086	1.91186	RNA001_Ecoli_TEX_replicate1
NC_000913.3	b1095	b1095	1	859	1280	67.1094	RNA001_Ecoli_TEX_replicate1
NC_000913.3	b1095	b1094,b1095	2	393	1280	30.7031	RNA001_Ecoli_TEX_replicate1
NC_000913.3	b1097	b1097	1	73	85	85.8824	RNA001_Ecoli_TEX_replicate1
NC_000913.3	b1098	b1098	1	152	196	77.551	RNA001_Ecoli_TEX_replicate1
NC_000913.3	b1099	b1099	1	46	96	47.9167	RNA001_Ecoli_TEX_replicate1
NC_000913.3	b1100	b1100	1	111	128	86.7188	RNA001_Ecoli_TEX_replicate1
NC_000913.3	b1101	b1101	1	995	1000	99.5	RNA001_Ecoli_TEX_replicate1
NC_000913.3	b1104	b1104	1	115	150	76.6667	RNA001_Ecoli_TEX_replicate1
NC_000913.3	b1107	b1107,b1108	2	236	336	70.2381	RNA001_Ecoli_TEX_replicate1
NC_000913.3	b1107	b1107	1	94	336	27.9762	RNA001_Ecoli_TEX_replicate1
NC_000913.3	b1108	b1108	1	302	542	55.7196	RNA001_Ecoli_TEX_replicate1
NC_000913.3	b1108	b1107,b1108	2	236	542	43.5424	RNA001_Ecoli_TEX_replicate1
NC_000913.3	b1109	b1109	1	1259	1285	97.9767	RNA001_Ecoli_TEX_replicate1
NC_000913.3	b1114	b1114	1	207	210	98.5714	RNA001_Ecoli_TEX_replicate1
NC_000913.3	b1116	b1116	1	52	66	78.7879	RNA001_Ecoli_TEX_replicate1
NC_000913.3	b1117	b1117	1	175	222	78.8288	RNA001_Ecoli_TEX_replicate1
NC_000913.3	b1118	b1118,b1119	2	42	232	18.1034	RNA001_Ecoli_TEX_replicate1
NC_000913.3	b1118	b1118	1	149	232	64.2241	RNA001_Ecoli_TEX_replicate1
NC_000913.3	b1119	b1119	1	130	197	65.9898	RNA001_Ecoli_TEX_replicate1
NC_000913.3	b1119	b1118,b1119	2	42	197	21.3198	RNA001_Ecoli_TEX_replicate1
NC_000913.3	b1120	b1120	1	57	86	66.2791	RNA001_Ecoli_TEX_replicate1
NC_000913.3	b1123	b1123,b1124	2	74	842	8.7886	RNA001_Ecoli_TEX_replicate1
NC_000913.3	b1123	b1123	1	729	842	86.5796	RNA001_Ecoli_TEX_replicate1
NC_000913.3	b1124	b1124	1	301	384	78.3854	RNA001_Ecoli_TEX_replicate1
NC_000913.3	b1124	b1123,b1124	2	74	384	19.2708	RNA001_Ecoli_TEX_replicate1
NC_000913.3	b1125	b1125	1	88	111	79.2793	RNA001_Ecoli_TEX_replicate1
NC_000913.3	b1126	b1126	1	94	112	83.9286	RNA001_Ecoli_TEX_replicate1
NC_000913.3	b1127	b1127,b1128	2	48	493	9.73631	RNA001_Ecoli_TEX_replicate1
NC_000913.3	b1127	b1127	1	445	493	90.2637	RNA001_Ecoli_TEX_replicate1
NC_000913.3	b1128	b1128	1	96	154	62.3377	RNA001_Ecoli_TEX_replicate1
NC_000913.3	b1128	b1127,b1128	2	48	154	31.1688	RNA001_Ecoli_TEX_replicate1
NC_000913.3	b1129	b1129	1	50	72	69.4444	RNA001_Ecoli_TEX_replicate1
NC_000913.3	b1131	b1131	1	111	119	93.2773	RNA001_Ecoli_TEX_replicate1
NC_000913.3	b1133	b1133	1	261	283	92.2261	RNA001_Ecoli_TEX_replicate1
NC_000913.3	b1136	b1136	1	161	161	100	RNA001_Ecoli_TEX_replicate1
NC_000913.3	b1145	b1145	1	73	73	100	RNA001_Ecoli_TEX_replicate1
NC_000913.3	b1162	b1162	1	152	152	100	RNA001_Ecoli_TEX_replicate1
NC_000913.3	b1174	b1174,b1175	2	64	126	50.7937	RNA001_Ecoli_TEX_replicate1
NC_000913.3	b1174	b1174	1	48	126	38.0952	RNA001_Ecoli_TEX_replicate1
NC_000913.3	b1175	b1175,b1176	2	58	191	30.3665	RNA001_Ecoli_TEX_replicate1
NC_000913.3	b1175	b1175	1	55	191	28.7958	RNA001_Ecoli_TEX_replicate1
NC_000913.3	b1175	b1174,b1175	2	64	191	33.5079	RNA001_Ecoli_TEX_replicate1
NC_000913.3	b1176	b1176	1	143	215	66.5116	RNA001_Ecoli_TEX_replicate1
NC_000913.3	b1176	b1175,b1176	2	58	215	26.9767	RNA001_Ecoli_TEX_replicate1
NC_000913.3	b1177	b1177	1	119	144	82.6389	RNA001_Ecoli_TEX_replicate1
NC_000913.3	b1184	b1184	1	46	54	85.1852	RNA001_Ecoli_TEX_replicate1
NC_000913.3	b1185	b1185	1	419	425	98.5882	RNA001_Ecoli_TEX_replicate1
NC_000913.3	b1186	b1186	1	52	52	100	RNA001_Ecoli_TEX_replicate1
NC_000913.3	b1187	b1187	1	71	71	100	RNA001_Ecoli_TEX_replicate1
NC_000913.3	b1191	b1191	1	63	95	66.3158	RNA001_Ecoli_TEX_replicate1
NC_000913.3	b1198	b1198	1	227	239	94.9791	RNA001_Ecoli_TEX_replicate1
NC_000913.3	b1199	b1199	1	55	89	61.7978	RNA001_Ecoli_TEX_replicate1
NC_000913.3	b1200	b1200	1	132	161	81.9876	RNA001_Ecoli_TEX_replicate1
NC_000913.3	b1201	b1201	1	297	300	99	RNA001_Ecoli_TEX_replicate1
NC_000913.3	b1202	b1202	1	86	89	96.6292	RNA001_Ecoli_TEX_replicate1
NC_000913.3	b1203	b1203	1	142	149	95.302	RNA001_Ecoli_TEX_replicate1
NC_000913.3	b1205	b1205	1	78	87	89.6552	RNA001_Ecoli_TEX_replicate1
NC_000913.3	b1206	b1206	1	201	216	93.0556	RNA001_Ecoli_TEX_replicate1
NC_000913.3	b1207	b1207,b1208	2	67	438	15.2968	RNA001_Ecoli_TEX_replicate1
NC_000913.3	b1207	b1207	1	363	438	82.8767	RNA001_Ecoli_TEX_replicate1
NC_000913.3	b1208	b1208	1	217	296	73.3108	RNA001_Ecoli_TEX_replicate1
NC_000913.3	b1208	b1207,b1208	2	67	296	22.6351	RNA001_Ecoli_TEX_replicate1
NC_000913.3	b1210	b1210	1	370	407	90.9091	RNA001_Ecoli_TEX_replicate1
NC_000913.3	b1211	b1211	1	46	106	43.3962	RNA001_Ecoli_TEX_replicate1
NC_000913.3	b1212	b1212	1	64	93	68.8172	RNA001_Ecoli_TEX_replicate1
NC_000913.3	b1213	b1213,b1214	2	53	104	50.9615	RNA001_Ecoli_TEX_replicate1
NC_000913.3	b1214	b1214,b1215	2	79	442	17.8733	RNA001_Ecoli_TEX_replicate1
NC_000913.3	b1214	b1214	1	289	442	65.3846	RNA001_Ecoli_TEX_replicate1
NC_000913.3	b1214	b1213,b1214	2	53	442	11.991	RNA001_Ecoli_TEX_replicate1
NC_000913.3	b1215	b1215,b4419	2	77	485	15.8763	RNA001_Ecoli_TEX_replicate1
NC_000913.3	b1215	b1215	1	310	485	63.9175	RNA001_Ecoli_TEX_replicate1
NC_000913.3	b1215	b1214,b1215	2	79	485	16.2887	RNA001_Ecoli_TEX_replicate1
NC_000913.3	b1216	b1216	1	55	55	100	RNA001_Ecoli_TEX_replicate1
NC_000913.3	b1219	b1219	1	97	107	90.6542	RNA001_Ecoli_TEX_replicate1
NC_000913.3	b1220	b1220	1	62	78	79.4872	RNA001_Ecoli_TEX_replicate1
NC_000913.3	b1222	b1222	1	240	271	88.5609	RNA001_Ecoli_TEX_replicate1
NC_000913.3	b1223	b1223	1	955	955	100	RNA001_Ecoli_TEX_replicate1
NC_000913.3	b1224	b1224,b1225	2	47	776	6.0567	RNA001_Ecoli_TEX_replicate1
NC_000913.3	b1224	b1224	1	717	776	92.3969	RNA001_Ecoli_TEX_replicate1
NC_000913.3	b1225	b1225	1	163	252	64.6825	RNA001_Ecoli_TEX_replicate1
NC_000913.3	b1225	b1224,b1225	2	47	252	18.6508	RNA001_Ecoli_TEX_replicate1
NC_000913.3	b1226	b1226	1	67	131	51.145	RNA001_Ecoli_TEX_replicate1
NC_000913.3	b1227	b1227	1	161	195	82.5641	RNA001_Ecoli_TEX_replicate1
NC_000913.3	b1232	b1232	1	183	215	85.1163	RNA001_Ecoli_TEX_replicate1
NC_000913.3	b1233	b1233	1	56	88	63.6364	RNA001_Ecoli_TEX_replicate1
NC_000913.3	b1234	b1234	1	112	118	94.9153	RNA001_Ecoli_TEX_replicate1
NC_000913.3	b1235	b1235	1	74	80	92.5	RNA001_Ecoli_TEX_replicate1
NC_000913.3	b1236	b1236	1	924	926	99.784	RNA001_Ecoli_TEX_replicate1
NC_000913.3	b1237	b1237	1	304	305	99.6721	RNA001_Ecoli_TEX_replicate1
NC_000913.3	b1241	b1241	1	797	799	99.7497	RNA001_Ecoli_TEX_replicate1
NC_000913.3	b1242	b1242	1	97	98	98.9796	RNA001_Ecoli_TEX_replicate1
NC_000913.3	b1243	b1243	1	393	429	91.6084	RNA001_Ecoli_TEX_replicate1
NC_000913.3	b1244	b1244	1	174	218	79.8165	RNA001_Ecoli_TEX_replicate1
NC_000913.3	b1245	b1245,b1246	2	100	425	23.5294	RNA001_Ecoli_TEX_replicate1
NC_000913.3	b1245	b1245	1	311	425	73.1765	RNA001_Ecoli_TEX_replicate1
NC_000913.3	b1246	b1245,b1246	2	100	403	24.8139	RNA001_Ecoli_TEX_replicate1
NC_000913.3	b1246	b1246	1	278	403	68.9826	RNA001_Ecoli_TEX_replicate1
NC_000913.3	b1247	b1247	1	300	334	89.8204	RNA001_Ecoli_TEX_replicate1
NC_000913.3	b1248	b1248,b1249	2	52	90	57.7778	RNA001_Ecoli_TEX_replicate1
NC_000913.3	b1249	b1249	1	276	330	83.6364	RNA001_Ecoli_TEX_replicate1
NC_000913.3	b1249	b1248,b1249	2	52	330	15.7576	RNA001_Ecoli_TEX_replicate1
NC_000913.3	b1253	b1253	1	181	186	97.3118	RNA001_Ecoli_TEX_replicate1
NC_000913.3	b1254	b1254	1	172	195	88.2051	RNA001_Ecoli_TEX_replicate1
NC_000913.3	b1255	b1255	1	58	79	73.4177	RNA001_Ecoli_TEX_replicate1
NC_000913.3	b1256	b1256	1	73	77	94.8052	RNA001_Ecoli_TEX_replicate1
NC_000913.3	b1266	b1266,b1267	2	58	274	21.1679	RNA001_Ecoli_TEX_replicate1
NC_000913.3	b1266	b1266	1	192	274	70.073	RNA001_Ecoli_TEX_replicate1
NC_000913.3	b1267	b1266,b1267	2	58	100	58	RNA001_Ecoli_TEX_replicate1
NC_000913.3	b1268	b1268	1	44	82	53.6585	RNA001_Ecoli_TEX_replicate1
NC_000913.3	b1269	b1269	1	364	385	94.5455	RNA001_Ecoli_TEX_replicate1
NC_000913.3	b1272	b1272	1	256	294	87.0748	RNA001_Ecoli_TEX_replicate1
NC_000913.3	b1273	b1273	1	299	337	88.724	RNA001_Ecoli_TEX_replicate1
NC_000913.3	b1274	b1274	1	550	551	99.8185	RNA001_Ecoli_TEX_replicate1
NC_000913.3	b1275	b1275	1	127	127	100	RNA001_Ecoli_TEX_replicate1
NC_000913.3	b1276	b1276	1	51	87	58.6207	RNA001_Ecoli_TEX_replicate1
NC_000913.3	b1277	b1277	1	157	193	81.3472	RNA001_Ecoli_TEX_replicate1
NC_000913.3	b1279	b1279	1	51	84	60.7143	RNA001_Ecoli_TEX_replicate1
NC_000913.3	b1280	b1280	1	388	419	92.6014	RNA001_Ecoli_TEX_replicate1
NC_000913.3	b1281	b1281,b1282	2	45	128	35.1562	RNA001_Ecoli_TEX_replicate1
NC_000913.3	b1281	b1281	1	81	128	63.2812	RNA001_Ecoli_TEX_replicate1
NC_000913.3	b1282	b1281,b1282	2	45	67	67.1642	RNA001_Ecoli_TEX_replicate1
NC_000913.3	b1284	b1284,b4596	2	61	142	42.9577	RNA001_Ecoli_TEX_replicate1
NC_000913.3	b1284	b1284	1	80	142	56.338	RNA001_Ecoli_TEX_replicate1
NC_000913.3	b1286	b1286	1	211	216	97.6852	RNA001_Ecoli_TEX_replicate1
NC_000913.3	b1288	b1288	1	290	294	98.6395	RNA001_Ecoli_TEX_replicate1
NC_000913.3	b1290	b1290	1	51	62	82.2581	RNA001_Ecoli_TEX_replicate1
NC_000913.3	b1291	b1291	1	186	202	92.0792	RNA001_Ecoli_TEX_replicate1
NC_000913.3	b1293	b1293	1	155	176	88.0682	RNA001_Ecoli_TEX_replicate1
NC_000913.3	b1294	b1294	1	106	110	96.3636	RNA001_Ecoli_TEX_replicate1
NC_000913.3	b1304	b1304	1	44	46	95.6522	RNA001_Ecoli_TEX_replicate1
NC_000913.3	b1316	b1316	1	46	46	100	RNA001_Ecoli_TEX_replicate1
NC_000913.3	b1320	b1320	1	79	80	98.75	RNA001_Ecoli_TEX_replicate1
NC_000913.3	b1321	b1321	1	109	127	85.8268	RNA001_Ecoli_TEX_replicate1
NC_000913.3	b1322	b1322	1	108	133	81.203	RNA001_Ecoli_TEX_replicate1
NC_000913.3	b1323	b1323	1	135	167	80.8383	RNA001_Ecoli_TEX_replicate1
NC_000913.3	b1324	b1324	1	313	342	91.5205	RNA001_Ecoli_TEX_replicate1
NC_000913.3	b1328	b1328	1	119	127	93.7008	RNA001_Ecoli_TEX_replicate1
NC_000913.3	b1329	b1329	1	80	98	81.6327	RNA001_Ecoli_TEX_replicate1
NC_000913.3	b1330	b1330	1	45	56	80.3571	RNA001_Ecoli_TEX_replicate1
NC_000913.3	b1332	b1332	1	50	59	84.7458	RNA001_Ecoli_TEX_replicate1
NC_000913.3	b1333	b1333	1	103	119	86.5546	RNA001_Ecoli_TEX_replicate1
NC_000913.3	b1334	b1334	1	595	609	97.7011	RNA001_Ecoli_TEX_replicate1
NC_000913.3	b1335	b1335	1	55	60	91.6667	RNA001_Ecoli_TEX_replicate1
NC_000913.3	b1340	b1340	1	241	277	87.0036	RNA001_Ecoli_TEX_replicate1
NC_000913.3	b1341	b1341	1	55	93	59.1398	RNA001_Ecoli_TEX_replicate1
NC_000913.3	b1343	b1343	1	64	70	91.4286	RNA001_Ecoli_TEX_replicate1
NC_000913.3	b1344	b1344	1	127	149	85.2349	RNA001_Ecoli_TEX_replicate1
NC_000913.3	b1356	b1356	1	235	237	99.1561	RNA001_Ecoli_TEX_replicate1
NC_000913.3	b1363	b1363	1	146	147	99.3197	RNA001_Ecoli_TEX_replicate1
NC_000913.3	b1376	b1376	1	68	68	100	RNA001_Ecoli_TEX_replicate1
NC_000913.3	b1378	b1378	1	228	231	98.7013	RNA001_Ecoli_TEX_replicate1
NC_000913.3	b1379	b1379	1	65	222	29.2793	RNA001_Ecoli_TEX_replicate1
NC_000913.3	b1379	b1379,b4529	2	141	222	63.5135	RNA001_Ecoli_TEX_replicate1
NC_000913.3	b1380	b1380	1	145	175	82.8571	RNA001_Ecoli_TEX_replicate1
NC_000913.3	b1381	b1381	1	134	153	87.5817	RNA001_Ecoli_TEX_replicate1
NC_000913.3	b1413	b1413	1	222	223	99.5516	RNA001_Ecoli_TEX_replicate1
NC_000913.3	b1420	b1420,b4428	2	94	106	88.6792	RNA001_Ecoli_TEX_replicate1
NC_000913.3	b1421	b1421	1	52	52	100	RNA001_Ecoli_TEX_replicate1
NC_000913.3	b1424	b1424	1	193	195	98.9744	RNA001_Ecoli_TEX_replicate1
NC_000913.3	b1430	b1430	1	231	251	92.0319	RNA001_Ecoli_TEX_replicate1
NC_000913.3	b1431	b1431	1	56	70	80	RNA001_Ecoli_TEX_replicate1
NC_000913.3	b1432	b1432	1	47	47	100	RNA001_Ecoli_TEX_replicate1
NC_000913.3	b1435	b1435	1	136	140	97.1429	RNA001_Ecoli_TEX_replicate1
NC_000913.3	b1442	b1442	1	57	63	90.4762	RNA001_Ecoli_TEX_replicate1
NC_000913.3	b1446	b1446	1	187	228	82.0175	RNA001_Ecoli_TEX_replicate1
NC_000913.3	b1453	b1453	1	383	401	95.5112	RNA001_Ecoli_TEX_replicate1
NC_000913.3	b1473	b1473	1	42	42	100	RNA001_Ecoli_TEX_replicate1
NC_000913.3	b1474	b1474	1	769	834	92.2062	RNA001_Ecoli_TEX_replicate1
NC_000913.3	b1475	b1475,b1476	2	243	825	29.4545	RNA001_Ecoli_TEX_replicate1
NC_000913.3	b1475	b1475	1	517	825	62.6667	RNA001_Ecoli_TEX_replicate1
NC_000913.3	b1476	b1475,b1476	2	243	431	56.3805	RNA001_Ecoli_TEX_replicate1
NC_000913.3	b1476	b1476	1	156	431	36.1949	RNA001_Ecoli_TEX_replicate1
NC_000913.3	b1477	b1477	1	142	144	98.6111	RNA001_Ecoli_TEX_replicate1
NC_000913.3	b1479	b1479	1	400	408	98.0392	RNA001_Ecoli_TEX_replicate1
NC_000913.3	b1482	b1482	1	108	113	95.5752	RNA001_Ecoli_TEX_replicate1
NC_000913.3	b1507	b1507	1	72	84	85.7143	RNA001_Ecoli_TEX_replicate1
NC_000913.3	b1511	b1511	1	43	48	89.5833	RNA001_Ecoli_TEX_replicate1
NC_000913.3	b1522	b1522	1	56	60	93.3333	RNA001_Ecoli_TEX_replicate1
NC_000913.3	b1528	b1528	1	47	60	78.3333	RNA001_Ecoli_TEX_replicate1
NC_000913.3	b1529	b1529	1	50	65	76.9231	RNA001_Ecoli_TEX_replicate1
NC_000913.3	b1533	b1533	1	77	93	82.7957	RNA001_Ecoli_TEX_replicate1
NC_000913.3	b1538	b1538	1	115	119	96.6387	RNA001_Ecoli_TEX_replicate1
NC_000913.3	b1539	b1539	1	136	150	90.6667	RNA001_Ecoli_TEX_replicate1
NC_000913.3	b1540	b1540	1	141	154	91.5584	RNA001_Ecoli_TEX_replicate1
NC_000913.3	b1541	b1541	1	69	70	98.5714	RNA001_Ecoli_TEX_replicate1
NC_000913.3	b1550	b1550	1	52	52	100	RNA001_Ecoli_TEX_replicate1
NC_000913.3	b1557	b1557	1	864	866	99.7691	RNA001_Ecoli_TEX_replicate1
NC_000913.3	b1558	b1558	1	90	92	97.8261	RNA001_Ecoli_TEX_replicate1
NC_000913.3	b1560	b1560	1	75	78	96.1538	RNA001_Ecoli_TEX_replicate1
NC_000913.3	b1562	b1562	1	70	94	74.4681	RNA001_Ecoli_TEX_replicate1
NC_000913.3	b1566	b1566	1	71	71	100	RNA001_Ecoli_TEX_replicate1
NC_000913.3	b1570	b1570	1	50	50	100	RNA001_Ecoli_TEX_replicate1
NC_000913.3	b1584	b1584	1	42	47	89.3617	RNA001_Ecoli_TEX_replicate1
NC_000913.3	b1587	b1587	1	89	89	100	RNA001_Ecoli_TEX_replicate1
NC_000913.3	b1590	b1590	1	45	65	69.2308	RNA001_Ecoli_TEX_replicate1
NC_000913.3	b1591	b1591	1	66	87	75.8621	RNA001_Ecoli_TEX_replicate1
NC_000913.3	b1592	b1592,b1593	2	46	85	54.1176	RNA001_Ecoli_TEX_replicate1
NC_000913.3	b1593	b1593	1	143	191	74.8691	RNA001_Ecoli_TEX_replicate1
NC_000913.3	b1593	b1592,b1593	2	46	191	24.0838	RNA001_Ecoli_TEX_replicate1
NC_000913.3	b1594	b1594	1	222	225	98.6667	RNA001_Ecoli_TEX_replicate1
NC_000913.3	b1596	b1596	1	106	107	99.0654	RNA001_Ecoli_TEX_replicate1
NC_000913.3	b1598	b1598	1	61	69	88.4058	RNA001_Ecoli_TEX_replicate1
NC_000913.3	b1601	b1601	1	72	79	91.1392	RNA001_Ecoli_TEX_replicate1
NC_000913.3	b1602	b1602	1	287	328	87.5	RNA001_Ecoli_TEX_replicate1
NC_000913.3	b1603	b1603	1	220	256	85.9375	RNA001_Ecoli_TEX_replicate1
NC_000913.3	b1604	b1604	1	107	107	100	RNA001_Ecoli_TEX_replicate1
NC_000913.3	b1605	b1605	1	364	380	95.7895	RNA001_Ecoli_TEX_replicate1
NC_000913.3	b1609	b1609	1	212	220	96.3636	RNA001_Ecoli_TEX_replicate1
NC_000913.3	b1613	b1613	1	112	112	100	RNA001_Ecoli_TEX_replicate1
NC_000913.3	b1614	b1614	1	357	357	100	RNA001_Ecoli_TEX_replicate1
NC_000913.3	b1620	b1620	1	43	45	95.5556	RNA001_Ecoli_TEX_replicate1
NC_000913.3	b1622	b1622	1	69	70	98.5714	RNA001_Ecoli_TEX_replicate1
NC_000913.3	b1623	b1623	1	58	65	89.2308	RNA001_Ecoli_TEX_replicate1
NC_000913.3	b1624	b1624	1	55	61	90.1639	RNA001_Ecoli_TEX_replicate1
NC_000913.3	b1626	b1626	1	149	202	73.7624	RNA001_Ecoli_TEX_replicate1
NC_000913.3	b1627	b1627,b1628	2	68	275	24.7273	RNA001_Ecoli_TEX_replicate1
NC_000913.3	b1627	b1627	1	181	275	65.8182	RNA001_Ecoli_TEX_replicate1
NC_000913.3	b1628	b1628,b1629	2	44	369	11.9241	RNA001_Ecoli_TEX_replicate1
NC_000913.3	b1628	b1628	1	250	369	67.7507	RNA001_Ecoli_TEX_replicate1
NC_000913.3	b1628	b1627,b1628	2	68	369	18.4282	RNA001_Ecoli_TEX_replicate1
NC_000913.3	b1629	b1629	1	253	304	83.2237	RNA001_Ecoli_TEX_replicate1
NC_000913.3	b1629	b1628,b1629	2	44	304	14.4737	RNA001_Ecoli_TEX_replicate1
NC_000913.3	b1631	b1631	1	78	100	78	RNA001_Ecoli_TEX_replicate1
NC_000913.3	b1632	b1632	1	70	106	66.0377	RNA001_Ecoli_TEX_replicate1
NC_000913.3	b1633	b1633	1	88	114	77.193	RNA001_Ecoli_TEX_replicate1
NC_000913.3	b1634	b1634	1	1033	1035	99.8068	RNA001_Ecoli_TEX_replicate1
NC_000913.3	b1636	b1636	1	154	176	87.5	RNA001_Ecoli_TEX_replicate1
NC_000913.3	b1637	b1637	1	570	593	96.1214	RNA001_Ecoli_TEX_replicate1
NC_000913.3	b1640	b1640	1	55	61	90.1639	RNA001_Ecoli_TEX_replicate1
NC_000913.3	b1641	b1641,b1642	2	42	896	4.6875	RNA001_Ecoli_TEX_replicate1
NC_000913.3	b1641	b1641	1	854	896	95.3125	RNA001_Ecoli_TEX_replicate1
NC_000913.3	b1642	b1642	1	69	113	61.0619	RNA001_Ecoli_TEX_replicate1
NC_000913.3	b1642	b1641,b1642	2	42	113	37.1681	RNA001_Ecoli_TEX_replicate1
NC_000913.3	b1645	b1645	1	108	126	85.7143	RNA001_Ecoli_TEX_replicate1
NC_000913.3	b1647	b1647	1	56	71	78.8732	RNA001_Ecoli_TEX_replicate1
NC_000913.3	b1651	b1651	1	77	86	89.5349	RNA001_Ecoli_TEX_replicate1
NC_000913.3	b1653	b1653	1	66	79	83.5443	RNA001_Ecoli_TEX_replicate1
NC_000913.3	b1654	b1654	1	335	343	97.6676	RNA001_Ecoli_TEX_replicate1
NC_000913.3	b1655	b1655	1	87	88	98.8636	RNA001_Ecoli_TEX_replicate1
NC_000913.3	b1656	b1656	1	194	199	97.4874	RNA001_Ecoli_TEX_replicate1
NC_000913.3	b1657	b1657	1	61	66	92.4242	RNA001_Ecoli_TEX_replicate1
NC_000913.3	b1658	b1658	1	263	280	93.9286	RNA001_Ecoli_TEX_replicate1
NC_000913.3	b1659	b1659	1	45	62	72.5806	RNA001_Ecoli_TEX_replicate1
NC_000913.3	b1660	b1660	1	495	498	99.3976	RNA001_Ecoli_TEX_replicate1
NC_000913.3	b1661	b1661	1	181	193	93.7824	RNA001_Ecoli_TEX_replicate1
NC_000913.3	b1662	b1662	1	87	96	90.625	RNA001_Ecoli_TEX_replicate1
NC_000913.3	b1663	b1663	1	133	141	94.3262	RNA001_Ecoli_TEX_replicate1
NC_000913.3	b1664	b1664	1	147	154	95.4545	RNA001_Ecoli_TEX_replicate1
NC_000913.3	b1667	b1667	1	344	353	97.4504	RNA001_Ecoli_TEX_replicate1
NC_000913.3	b1675	b1675	1	61	62	98.3871	RNA001_Ecoli_TEX_replicate1
NC_000913.3	b1676	b1676	1	313	313	100	RNA001_Ecoli_TEX_replicate1
NC_000913.3	b1677	b1677	1	1509	1513	99.7356	RNA001_Ecoli_TEX_replicate1
NC_000913.3	b1686	b1686,b1687	2	43	74	58.1081	RNA001_Ecoli_TEX_replicate1
NC_000913.3	b1687	b1687	1	85	133	63.9098	RNA001_Ecoli_TEX_replicate1
NC_000913.3	b1687	b1686,b1687	2	43	133	32.3308	RNA001_Ecoli_TEX_replicate1
NC_000913.3	b1688	b1688	1	283	283	100	RNA001_Ecoli_TEX_replicate1
NC_000913.3	b1693	b1693	1	75	77	97.4026	RNA001_Ecoli_TEX_replicate1
NC_000913.3	b1702	b1702	1	94	95	98.9474	RNA001_Ecoli_TEX_replicate1
NC_000913.3	b1704	b1704	1	83	85	97.6471	RNA001_Ecoli_TEX_replicate1
NC_000913.3	b1709	b1709	1	90	103	87.3786	RNA001_Ecoli_TEX_replicate1
NC_000913.3	b1711	b1711	1	81	101	80.198	RNA001_Ecoli_TEX_replicate1
NC_000913.3	b1712	b1712,b1713	2	220	347	63.4006	RNA001_Ecoli_TEX_replicate1
NC_000913.3	b1712	b1712	1	120	347	34.5821	RNA001_Ecoli_TEX_replicate1
NC_000913.3	b1713	b1713,b1714	2	117	1572	7.44275	RNA001_Ecoli_TEX_replicate1
NC_000913.3	b1713	b1713	1	1228	1572	78.117	RNA001_Ecoli_TEX_replicate1
NC_000913.3	b1713	b1712,b1713	2	220	1572	13.9949	RNA001_Ecoli_TEX_replicate1
NC_000913.3	b1714	b1714	1	274	397	69.0176	RNA001_Ecoli_TEX_replicate1
NC_000913.3	b1714	b1713,b1714	2	117	397	29.471	RNA001_Ecoli_TEX_replicate1
NC_000913.3	b1716	b1716,b1717,b1718,b1719	4	235	1616	14.5421	RNA001_Ecoli_TEX_replicate1
NC_000913.3	b1716	b1716,b1717,b1718	3	474	1616	29.3317	RNA001_Ecoli_TEX_replicate1
NC_000913.3	b1716	b1716,b1717	2	269	1616	16.646	RNA001_Ecoli_TEX_replicate1
NC_000913.3	b1716	b1716	1	638	1616	39.4802	RNA001_Ecoli_TEX_replicate1
NC_000913.3	b1717	b1716,b1717,b1718,b1719	4	235	1318	17.83	RNA001_Ecoli_TEX_replicate1
NC_000913.3	b1717	b1717,b1718,b1719	3	147	1318	11.1533	RNA001_Ecoli_TEX_replicate1
NC_000913.3	b1717	b1716,b1717,b1718	3	474	1318	35.9636	RNA001_Ecoli_TEX_replicate1
NC_000913.3	b1717	b1717,b1718	2	107	1318	8.11836	RNA001_Ecoli_TEX_replicate1
NC_000913.3	b1717	b1717	1	86	1318	6.52504	RNA001_Ecoli_TEX_replicate1
NC_000913.3	b1717	b1716,b1717	2	269	1318	20.4097	RNA001_Ecoli_TEX_replicate1
NC_000913.3	b1718	b1716,b1717,b1718,b1719	4	235	2833	8.29509	RNA001_Ecoli_TEX_replicate1
NC_000913.3	b1718	b1718,b1719	2	979	2833	34.557	RNA001_Ecoli_TEX_replicate1
NC_000913.3	b1718	b1717,b1718,b1719	3	147	2833	5.18885	RNA001_Ecoli_TEX_replicate1
NC_000913.3	b1718	b1718	1	891	2833	31.4508	RNA001_Ecoli_TEX_replicate1
NC_000913.3	b1718	b1716,b1717,b1718	3	474	2833	16.7314	RNA001_Ecoli_TEX_replicate1
NC_000913.3	b1718	b1717,b1718	2	107	2833	3.77691	RNA001_Ecoli_TEX_replicate1
NC_000913.3	b1719	b1719	1	1173	2534	46.2904	RNA001_Ecoli_TEX_replicate1
NC_000913.3	b1719	b1716,b1717,b1718,b1719	4	235	2534	9.27388	RNA001_Ecoli_TEX_replicate1
NC_000913.3	b1719	b1718,b1719	2	979	2534	38.6346	RNA001_Ecoli_TEX_replicate1
NC_000913.3	b1719	b1717,b1718,b1719	3	147	2534	5.8011	RNA001_Ecoli_TEX_replicate1
NC_000913.3	b1722	b1722	1	141	141	100	RNA001_Ecoli_TEX_replicate1
NC_000913.3	b1725	b1725	1	54	67	80.597	RNA001_Ecoli_TEX_replicate1
NC_000913.3	b1729	b1729	1	97	103	94.1748	RNA001_Ecoli_TEX_replicate1
NC_000913.3	b1740	b1740	1	151	155	97.4194	RNA001_Ecoli_TEX_replicate1
NC_000913.3	b1742	b1742	1	49	66	74.2424	RNA001_Ecoli_TEX_replicate1
NC_000913.3	b1743	b1743	1	59	59	100	RNA001_Ecoli_TEX_replicate1
NC_000913.3	b1749	b1749	1	501	511	98.0431	RNA001_Ecoli_TEX_replicate1
NC_000913.3	b1750	b1750	1	48	60	80	RNA001_Ecoli_TEX_replicate1
NC_000913.3	b1754	b1754	1	51	56	91.0714	RNA001_Ecoli_TEX_replicate1
NC_000913.3	b1755	b1755	1	60	66	90.9091	RNA001_Ecoli_TEX_replicate1
NC_000913.3	b1757	b1757	1	98	106	92.4528	RNA001_Ecoli_TEX_replicate1
NC_000913.3	b1758	b1758	1	46	53	86.7925	RNA001_Ecoli_TEX_replicate1
NC_000913.3	b1761	b1761	1	167	174	95.977	RNA001_Ecoli_TEX_replicate1
NC_000913.3	b1763	b1763,b1764	2	99	285	34.7368	RNA001_Ecoli_TEX_replicate1
NC_000913.3	b1763	b1763	1	185	285	64.9123	RNA001_Ecoli_TEX_replicate1
NC_000913.3	b1764	b1764	1	154	256	60.1562	RNA001_Ecoli_TEX_replicate1
NC_000913.3	b1764	b1763,b1764	2	99	256	38.6719	RNA001_Ecoli_TEX_replicate1
NC_000913.3	b1766	b1766	1	111	112	99.1071	RNA001_Ecoli_TEX_replicate1
NC_000913.3	b1768	b1768	1	60	80	75	RNA001_Ecoli_TEX_replicate1
NC_000913.3	b1779	b1779	1	1536	1539	99.8051	RNA001_Ecoli_TEX_replicate1
NC_000913.3	b1780	b1780	1	60	65	92.3077	RNA001_Ecoli_TEX_replicate1
NC_000913.3	b1782	b1782	1	164	166	98.7952	RNA001_Ecoli_TEX_replicate1
NC_000913.3	b1783	b1783	1	60	60	100	RNA001_Ecoli_TEX_replicate1
NC_000913.3	b1787	b1787	1	78	100	78	RNA001_Ecoli_TEX_replicate1
NC_000913.3	b1789	b1789	1	60	68	88.2353	RNA001_Ecoli_TEX_replicate1
NC_000913.3	b1795	b1795	1	55	56	98.2143	RNA001_Ecoli_TEX_replicate1
NC_000913.3	b1798	b1798	1	112	113	99.115	RNA001_Ecoli_TEX_replicate1
NC_000913.3	b1799	b1799	1	50	51	98.0392	RNA001_Ecoli_TEX_replicate1
NC_000913.3	b1804	b1804	1	354	377	93.8992	RNA001_Ecoli_TEX_replicate1
NC_000913.3	b1805	b1805	1	86	93	92.4731	RNA001_Ecoli_TEX_replicate1
NC_000913.3	b1806	b1806	1	86	116	74.1379	RNA001_Ecoli_TEX_replicate1
NC_000913.3	b1807	b1807	1	66	95	69.4737	RNA001_Ecoli_TEX_replicate1
NC_000913.3	b1808	b1808	1	103	107	96.2617	RNA001_Ecoli_TEX_replicate1
NC_000913.3	b1809	b1809	1	142	143	99.3007	RNA001_Ecoli_TEX_replicate1
NC_000913.3	b1814	b1814	1	225	227	99.1189	RNA001_Ecoli_TEX_replicate1
NC_000913.3	b1816	b1816	1	164	178	92.1348	RNA001_Ecoli_TEX_replicate1
NC_000913.3	b1817	b1817	1	343	385	89.0909	RNA001_Ecoli_TEX_replicate1
NC_000913.3	b1818	b1818	1	117	187	62.5668	RNA001_Ecoli_TEX_replicate1
NC_000913.3	b1819	b1819	1	158	208	75.9615	RNA001_Ecoli_TEX_replicate1
NC_000913.3	b1821	b1821,b1822	2	129	759	16.996	RNA001_Ecoli_TEX_replicate1
NC_000913.3	b1821	b1821	1	628	759	82.7404	RNA001_Ecoli_TEX_replicate1
NC_000913.3	b1822	b1822,b1823,b1824	3	62	482	12.8631	RNA001_Ecoli_TEX_replicate1
NC_000913.3	b1822	b1822	1	288	482	59.751	RNA001_Ecoli_TEX_replicate1
NC_000913.3	b1822	b1821,b1822	2	129	482	26.7635	RNA001_Ecoli_TEX_replicate1
NC_000913.3	b1823	b1823,b1824	2	953	1298	73.4206	RNA001_Ecoli_TEX_replicate1
NC_000913.3	b1823	b1822,b1823,b1824	3	62	1298	4.77658	RNA001_Ecoli_TEX_replicate1
NC_000913.3	b1823	b1823	1	280	1298	21.5716	RNA001_Ecoli_TEX_replicate1
NC_000913.3	b1824	b1824	1	550	1567	35.0989	RNA001_Ecoli_TEX_replicate1
NC_000913.3	b1824	b1823,b1824	2	953	1567	60.8168	RNA001_Ecoli_TEX_replicate1
NC_000913.3	b1824	b1822,b1823,b1824	3	62	1567	3.9566	RNA001_Ecoli_TEX_replicate1
NC_000913.3	b1825	b1825	1	113	137	82.4818	RNA001_Ecoli_TEX_replicate1
NC_000913.3	b1827	b1827	1	103	112	91.9643	RNA001_Ecoli_TEX_replicate1
NC_000913.3	b1828	b1828	1	44	44	100	RNA001_Ecoli_TEX_replicate1
NC_000913.3	b1829	b1829	1	92	105	87.619	RNA001_Ecoli_TEX_replicate1
NC_000913.3	b1830	b1830,b1831	2	959	2215	43.2957	RNA001_Ecoli_TEX_replicate1
NC_000913.3	b1830	b1830	1	1208	2215	54.5372	RNA001_Ecoli_TEX_replicate1
NC_000913.3	b1831	b1831,b1832	2	140	3003	4.662	RNA001_Ecoli_TEX_replicate1
NC_000913.3	b1831	b1831	1	1868	3003	62.2045	RNA001_Ecoli_TEX_replicate1
NC_000913.3	b1831	b1830,b1831	2	959	3003	31.9347	RNA001_Ecoli_TEX_replicate1
NC_000913.3	b1832	b1832	1	653	828	78.8647	RNA001_Ecoli_TEX_replicate1
NC_000913.3	b1832	b1831,b1832	2	140	828	16.9082	RNA001_Ecoli_TEX_replicate1
NC_000913.3	b1833	b1833	1	80	89	89.8876	RNA001_Ecoli_TEX_replicate1
NC_000913.3	b1834	b1834	1	97	107	90.6542	RNA001_Ecoli_TEX_replicate1
NC_000913.3	b1839	b1839	1	45	70	64.2857	RNA001_Ecoli_TEX_replicate1
NC_000913.3	b1840	b1840	1	60	88	68.1818	RNA001_Ecoli_TEX_replicate1
NC_000913.3	b1842	b1842	1	90	110	81.8182	RNA001_Ecoli_TEX_replicate1
NC_000913.3	b1846	b1846	1	52	52	100	RNA001_Ecoli_TEX_replicate1
NC_000913.3	b1847	b1847	1	64	77	83.1169	RNA001_Ecoli_TEX_replicate1
NC_000913.3	b1849	b1849	1	58	75	77.3333	RNA001_Ecoli_TEX_replicate1
NC_000913.3	b1850	b1850,b1851	2	70	255	27.451	RNA001_Ecoli_TEX_replicate1
NC_000913.3	b1850	b1850	1	168	255	65.8824	RNA001_Ecoli_TEX_replicate1
NC_000913.3	b1851	b1850,b1851	2	70	204	34.3137	RNA001_Ecoli_TEX_replicate1
NC_000913.3	b1851	b1851	1	125	204	61.2745	RNA001_Ecoli_TEX_replicate1
NC_000913.3	b1852	b1852	1	302	308	98.0519	RNA001_Ecoli_TEX_replicate1
NC_000913.3	b1854	b1854	1	260	273	95.2381	RNA001_Ecoli_TEX_replicate1
NC_000913.3	b1855	b1855	1	134	142	94.3662	RNA001_Ecoli_TEX_replicate1
NC_000913.3	b1856	b1856	1	56	81	69.1358	RNA001_Ecoli_TEX_replicate1
NC_000913.3	b1857	b1857	1	63	86	73.2558	RNA001_Ecoli_TEX_replicate1
NC_000913.3	b1859	b1859	1	134	145	92.4138	RNA001_Ecoli_TEX_replicate1
NC_000913.3	b1860	b1860,b1861	2	57	214	26.6355	RNA001_Ecoli_TEX_replicate1
NC_000913.3	b1860	b1860	1	148	214	69.1589	RNA001_Ecoli_TEX_replicate1
NC_000913.3	b1861	b1861	1	168	227	74.0088	RNA001_Ecoli_TEX_replicate1
NC_000913.3	b1861	b1860,b1861	2	57	227	25.1101	RNA001_Ecoli_TEX_replicate1
NC_000913.3	b1863	b1863,b1864	2	82	333	24.6246	RNA001_Ecoli_TEX_replicate1
NC_000913.3	b1863	b1863	1	201	333	60.3604	RNA001_Ecoli_TEX_replicate1
NC_000913.3	b1864	b1864,b1865	2	65	316	20.5696	RNA001_Ecoli_TEX_replicate1
NC_000913.3	b1864	b1864	1	119	316	37.6582	RNA001_Ecoli_TEX_replicate1
NC_000913.3	b1864	b1863,b1864	2	82	316	25.9494	RNA001_Ecoli_TEX_replicate1
NC_000913.3	b1865	b1864,b1865	2	65	296	21.9595	RNA001_Ecoli_TEX_replicate1
NC_000913.3	b1865	b1865	1	176	296	59.4595	RNA001_Ecoli_TEX_replicate1
NC_000913.3	b1866	b1866	1	306	319	95.9248	RNA001_Ecoli_TEX_replicate1
NC_000913.3	b1867	b1867	1	43	55	78.1818	RNA001_Ecoli_TEX_replicate1
NC_000913.3	b1869	b1869	1	139	153	90.8497	RNA001_Ecoli_TEX_replicate1
NC_000913.3	b1870	b1870	1	46	71	64.7887	RNA001_Ecoli_TEX_replicate1
NC_000913.3	b1871	b1871	1	63	84	75	RNA001_Ecoli_TEX_replicate1
NC_000913.3	b1874	b1874	1	82	92	89.1304	RNA001_Ecoli_TEX_replicate1
NC_000913.3	b1876	b1876	1	245	249	98.3936	RNA001_Ecoli_TEX_replicate1
NC_000913.3	b1878	b1878	1	250	288	86.8056	RNA001_Ecoli_TEX_replicate1
NC_000913.3	b1879	b1879	1	115	151	76.1589	RNA001_Ecoli_TEX_replicate1
NC_000913.3	b1880	b1880	1	461	482	95.6432	RNA001_Ecoli_TEX_replicate1
NC_000913.3	b1882	b1882	1	48	95	50.5263	RNA001_Ecoli_TEX_replicate1
NC_000913.3	b1886	b1886	1	137	147	93.1973	RNA001_Ecoli_TEX_replicate1
NC_000913.3	b1891	b1891,b1892	2	75	98	76.5306	RNA001_Ecoli_TEX_replicate1
NC_000913.3	b1892	b1892	1	150	225	66.6667	RNA001_Ecoli_TEX_replicate1
NC_000913.3	b1892	b1891,b1892	2	75	225	33.3333	RNA001_Ecoli_TEX_replicate1
NC_000913.3	b1896	b1896	1	62	73	84.9315	RNA001_Ecoli_TEX_replicate1
NC_000913.3	b1905	b1905	1	185	227	81.4978	RNA001_Ecoli_TEX_replicate1
NC_000913.3	b1907	b1907	1	179	211	84.8341	RNA001_Ecoli_TEX_replicate1
NC_000913.3	b1908	b1908	1	326	357	91.3165	RNA001_Ecoli_TEX_replicate1
NC_000913.3	b1912	b1912	1	49	55	89.0909	RNA001_Ecoli_TEX_replicate1
NC_000913.3	b1913	b1913,b1914	2	65	199	32.6633	RNA001_Ecoli_TEX_replicate1
NC_000913.3	b1913	b1913	1	128	199	64.3216	RNA001_Ecoli_TEX_replicate1
NC_000913.3	b1914	b1914	1	194	260	74.6154	RNA001_Ecoli_TEX_replicate1
NC_000913.3	b1914	b1913,b1914	2	65	260	25	RNA001_Ecoli_TEX_replicate1
NC_000913.3	b1915	b1915	1	110	117	94.0171	RNA001_Ecoli_TEX_replicate1
NC_000913.3	b1916	b1916	1	59	65	90.7692	RNA001_Ecoli_TEX_replicate1
NC_000913.3	b1919	b1919	1	120	123	97.561	RNA001_Ecoli_TEX_replicate1
NC_000913.3	b1922	b1922	1	436	480	90.8333	RNA001_Ecoli_TEX_replicate1
NC_000913.3	b1923	b1923	1	325	326	99.6933	RNA001_Ecoli_TEX_replicate1
NC_000913.3	b1927	b1927	1	42	45	93.3333	RNA001_Ecoli_TEX_replicate1
NC_000913.3	b1928	b1928	1	91	92	98.913	RNA001_Ecoli_TEX_replicate1
NC_000913.3	b1929	b1929	1	48	53	90.566	RNA001_Ecoli_TEX_replicate1
NC_000913.3	b1930	b1930	1	77	83	92.7711	RNA001_Ecoli_TEX_replicate1
NC_000913.3	b1936	b1936,b1937	2	43	51	84.3137	RNA001_Ecoli_TEX_replicate1
NC_000913.3	b1937	b1936,b1937	2	43	90	47.7778	RNA001_Ecoli_TEX_replicate1
NC_000913.3	b1937	b1937	1	42	90	46.6667	RNA001_Ecoli_TEX_replicate1
NC_000913.3	b1938	b1938,b1939	2	52	347	14.9856	RNA001_Ecoli_TEX_replicate1
NC_000913.3	b1938	b1938	1	293	347	84.438	RNA001_Ecoli_TEX_replicate1
NC_000913.3	b1939	b1939	1	91	168	54.1667	RNA001_Ecoli_TEX_replicate1
NC_000913.3	b1939	b1938,b1939	2	52	168	30.9524	RNA001_Ecoli_TEX_replicate1
NC_000913.3	b1940	b1940	1	46	88	52.2727	RNA001_Ecoli_TEX_replicate1
NC_000913.3	b1941	b1941	1	123	150	82	RNA001_Ecoli_TEX_replicate1
NC_000913.3	b1944	b1944	1	51	66	77.2727	RNA001_Ecoli_TEX_replicate1
NC_000913.3	b1945	b1945	1	81	111	72.973	RNA001_Ecoli_TEX_replicate1
NC_000913.3	b1948	b1948	1	108	126	85.7143	RNA001_Ecoli_TEX_replicate1
NC_000913.3	b1950	b1950	1	65	77	84.4156	RNA001_Ecoli_TEX_replicate1
NC_000913.3	b1956	b1956	1	63	80	78.75	RNA001_Ecoli_TEX_replicate1
NC_000913.3	b1958	b1958	1	72	91	79.1209	RNA001_Ecoli_TEX_replicate1
NC_000913.3	b1961	b1961	1	110	137	80.292	RNA001_Ecoli_TEX_replicate1
NC_000913.3	b1967	b1967	1	45	48	93.75	RNA001_Ecoli_TEX_replicate1
NC_000913.3	b1978	b1978	1	51	51	100	RNA001_Ecoli_TEX_replicate1
NC_000913.3	b1981	b1981	1	176	178	98.8764	RNA001_Ecoli_TEX_replicate1
NC_000913.3	b1983	b1983	1	117	117	100	RNA001_Ecoli_TEX_replicate1
NC_000913.3	b1985	b1985	1	62	62	100	RNA001_Ecoli_TEX_replicate1
NC_000913.3	b1991	b1991	1	142	167	85.0299	RNA001_Ecoli_TEX_replicate1
NC_000913.3	b1992	b1992	1	258	277	93.1408	RNA001_Ecoli_TEX_replicate1
NC_000913.3	b1993	b1993	1	49	54	90.7407	RNA001_Ecoli_TEX_replicate1
NC_000913.3	b1994	b1994	1	126	128	98.4375	RNA001_Ecoli_TEX_replicate1
NC_000913.3	b2000	b2000	1	469	490	95.7143	RNA001_Ecoli_TEX_replicate1
NC_000913.3	b2006	b2006	1	98	101	97.0297	RNA001_Ecoli_TEX_replicate1
NC_000913.3	b2007	b2007	1	235	251	93.6255	RNA001_Ecoli_TEX_replicate1
NC_000913.3	b2010	b2010	1	84	86	97.6744	RNA001_Ecoli_TEX_replicate1
NC_000913.3	b2013	b2013	1	68	90	75.5556	RNA001_Ecoli_TEX_replicate1
NC_000913.3	b2014	b2014	1	641	641	100	RNA001_Ecoli_TEX_replicate1
NC_000913.3	b2017	b2017	1	47	96	48.9583	RNA001_Ecoli_TEX_replicate1
NC_000913.3	b2017	b2017,b4539	2	42	96	43.75	RNA001_Ecoli_TEX_replicate1
NC_000913.3	b2019	b2019	1	48	55	87.2727	RNA001_Ecoli_TEX_replicate1
NC_000913.3	b2023	b2023	1	52	76	68.4211	RNA001_Ecoli_TEX_replicate1
NC_000913.3	b2026	b2026	1	137	153	89.5425	RNA001_Ecoli_TEX_replicate1
NC_000913.3	b2027	b2027	1	370	376	98.4043	RNA001_Ecoli_TEX_replicate1
NC_000913.3	b2029	b2029	1	652	659	98.9378	RNA001_Ecoli_TEX_replicate1
NC_000913.3	b2032	b2032	1	45	62	72.5806	RNA001_Ecoli_TEX_replicate1
NC_000913.3	b2034	b2034	1	59	102	57.8431	RNA001_Ecoli_TEX_replicate1
NC_000913.3	b2036	b2036	1	86	111	77.4775	RNA001_Ecoli_TEX_replicate1
NC_000913.3	b2037	b2037	1	44	86	51.1628	RNA001_Ecoli_TEX_replicate1
NC_000913.3	b2039	b2039	1	97	110	88.1818	RNA001_Ecoli_TEX_replicate1
NC_000913.3	b2040	b2040	1	80	123	65.0407	RNA001_Ecoli_TEX_replicate1
NC_000913.3	b2041	b2041	1	469	515	91.068	RNA001_Ecoli_TEX_replicate1
NC_000913.3	b2042	b2042	1	349	354	98.5876	RNA001_Ecoli_TEX_replicate1
NC_000913.3	b2063	b2063	1	231	234	98.7179	RNA001_Ecoli_TEX_replicate1
NC_000913.3	b2064	b2064,b2065	2	76	374	20.3209	RNA001_Ecoli_TEX_replicate1
NC_000913.3	b2064	b2064	1	286	374	76.4706	RNA001_Ecoli_TEX_replicate1
NC_000913.3	b2065	b2064,b2065	2	76	261	29.1188	RNA001_Ecoli_TEX_replicate1
NC_000913.3	b2065	b2065	1	156	261	59.7701	RNA001_Ecoli_TEX_replicate1
NC_000913.3	b2066	b2066	1	45	74	60.8108	RNA001_Ecoli_TEX_replicate1
NC_000913.3	b2067	b2067	1	87	97	89.6907	RNA001_Ecoli_TEX_replicate1
NC_000913.3	b2068	b2068	1	70	80	87.5	RNA001_Ecoli_TEX_replicate1
NC_000913.3	b2069	b2069	1	136	161	84.472	RNA001_Ecoli_TEX_replicate1
NC_000913.3	b2076	b2076	1	52	64	81.25	RNA001_Ecoli_TEX_replicate1
NC_000913.3	b2079	b2079	1	106	115	92.1739	RNA001_Ecoli_TEX_replicate1
NC_000913.3	b2081	b2081	1	306	308	99.3506	RNA001_Ecoli_TEX_replicate1
NC_000913.3	b2091	b2091,b2092	2	74	236	31.3559	RNA001_Ecoli_TEX_replicate1
NC_000913.3	b2091	b2091	1	147	236	62.2881	RNA001_Ecoli_TEX_replicate1
NC_000913.3	b2092	b2092	1	581	687	84.5706	RNA001_Ecoli_TEX_replicate1
NC_000913.3	b2092	b2091,b2092	2	74	687	10.7715	RNA001_Ecoli_TEX_replicate1
NC_000913.3	b2095	b2095,b2096	2	147	375	39.2	RNA001_Ecoli_TEX_replicate1
NC_000913.3	b2095	b2095	1	174	375	46.4	RNA001_Ecoli_TEX_replicate1
NC_000913.3	b2096	b2096	1	908	1062	85.4991	RNA001_Ecoli_TEX_replicate1
NC_000913.3	b2096	b2095,b2096	2	147	1062	13.8418	RNA001_Ecoli_TEX_replicate1
NC_000913.3	b2103	b2103	1	52	70	74.2857	RNA001_Ecoli_TEX_replicate1
NC_000913.3	b2104	b2104	1	79	96	82.2917	RNA001_Ecoli_TEX_replicate1
NC_000913.3	b2107	b2107	1	187	193	96.8912	RNA001_Ecoli_TEX_replicate1
NC_000913.3	b2113	b2113	1	315	317	99.3691	RNA001_Ecoli_TEX_replicate1
NC_000913.3	b2114	b2114	1	236	236	100	RNA001_Ecoli_TEX_replicate1
NC_000913.3	b2124	b2124	1	64	77	83.1169	RNA001_Ecoli_TEX_replicate1
NC_000913.3	b2126	b2126	1	108	145	74.4828	RNA001_Ecoli_TEX_replicate1
NC_000913.3	b2127	b2127	1	57	58	98.2759	RNA001_Ecoli_TEX_replicate1
NC_000913.3	b2132	b2132	1	243	245	99.1837	RNA001_Ecoli_TEX_replicate1
NC_000913.3	b2133	b2133	1	93	109	85.3211	RNA001_Ecoli_TEX_replicate1
NC_000913.3	b2134	b2134	1	195	211	92.4171	RNA001_Ecoli_TEX_replicate1
NC_000913.3	b2136	b2136	1	132	138	95.6522	RNA001_Ecoli_TEX_replicate1
NC_000913.3	b2140	b2140	1	84	84	100	RNA001_Ecoli_TEX_replicate1
NC_000913.3	b2142	b2142	1	63	88	71.5909	RNA001_Ecoli_TEX_replicate1
NC_000913.3	b2143	b2143	1	407	420	96.9048	RNA001_Ecoli_TEX_replicate1
NC_000913.3	b2152	b2152,b2153	2	104	167	62.2754	RNA001_Ecoli_TEX_replicate1
NC_000913.3	b2152	b2152	1	60	167	35.9281	RNA001_Ecoli_TEX_replicate1
NC_000913.3	b2153	b2152,b2153	2	104	268	38.806	RNA001_Ecoli_TEX_replicate1
NC_000913.3	b2153	b2153	1	163	268	60.8209	RNA001_Ecoli_TEX_replicate1
NC_000913.3	b2156	b2156	1	214	218	98.1651	RNA001_Ecoli_TEX_replicate1
NC_000913.3	b2157	b2157	1	45	49	91.8367	RNA001_Ecoli_TEX_replicate1
NC_000913.3	b2158	b2158	1	308	313	98.4026	RNA001_Ecoli_TEX_replicate1
NC_000913.3	b2159	b2159	1	101	142	71.1268	RNA001_Ecoli_TEX_replicate1
NC_000913.3	b2160	b2160	1	46	84	54.7619	RNA001_Ecoli_TEX_replicate1
NC_000913.3	b2161	b2161	1	83	85	97.6471	RNA001_Ecoli_TEX_replicate1
NC_000913.3	b2164	b2164	1	72	72	100	RNA001_Ecoli_TEX_replicate1
NC_000913.3	b2167	b2167,b2168	2	51	1046	4.87572	RNA001_Ecoli_TEX_replicate1
NC_000913.3	b2167	b2167	1	975	1046	93.2122	RNA001_Ecoli_TEX_replicate1
NC_000913.3	b2168	b2168,b2169	2	56	232	24.1379	RNA001_Ecoli_TEX_replicate1
NC_000913.3	b2168	b2167,b2168	2	51	232	21.9828	RNA001_Ecoli_TEX_replicate1
NC_000913.3	b2168	b2168	1	105	232	45.2586	RNA001_Ecoli_TEX_replicate1
NC_000913.3	b2169	b2169	1	148	224	66.0714	RNA001_Ecoli_TEX_replicate1
NC_000913.3	b2169	b2168,b2169	2	56	224	25	RNA001_Ecoli_TEX_replicate1
NC_000913.3	b2171	b2171	1	90	94	95.7447	RNA001_Ecoli_TEX_replicate1
NC_000913.3	b2173	b2173	1	72	93	77.4194	RNA001_Ecoli_TEX_replicate1
NC_000913.3	b2174	b2174	1	242	266	90.9774	RNA001_Ecoli_TEX_replicate1
NC_000913.3	b2175	b2175	1	1313	1321	99.3944	RNA001_Ecoli_TEX_replicate1
NC_000913.3	b2176	b2176	1	48	54	88.8889	RNA001_Ecoli_TEX_replicate1
NC_000913.3	b2177	b2177	1	79	84	94.0476	RNA001_Ecoli_TEX_replicate1
NC_000913.3	b2181	b2181	1	87	115	75.6522	RNA001_Ecoli_TEX_replicate1
NC_000913.3	b2182	b2182,b2183	2	59	690	8.55072	RNA001_Ecoli_TEX_replicate1
NC_000913.3	b2182	b2182	1	629	690	91.1594	RNA001_Ecoli_TEX_replicate1
NC_000913.3	b2183	b2183	1	236	295	80	RNA001_Ecoli_TEX_replicate1
NC_000913.3	b2183	b2182,b2183	2	59	295	20	RNA001_Ecoli_TEX_replicate1
NC_000913.3	b2185	b2185	1	687	689	99.7097	RNA001_Ecoli_TEX_replicate1
NC_000913.3	b2186	b2186	1	501	502	99.8008	RNA001_Ecoli_TEX_replicate1
NC_000913.3	b2188	b2188	1	181	204	88.7255	RNA001_Ecoli_TEX_replicate1
NC_000913.3	b2190	b2190,b2190	1	200	203	98.5222	RNA001_Ecoli_TEX_replicate1
NC_000913.3	b2190	b2190,b2190	1	200	203	98.5222	RNA001_Ecoli_TEX_replicate1
NC_000913.3	b2193	b2193	1	236	244	96.7213	RNA001_Ecoli_TEX_replicate1
NC_000913.3	b2194	b2194	1	167	201	83.0846	RNA001_Ecoli_TEX_replicate1
NC_000913.3	b2195	b2195	1	79	124	63.7097	RNA001_Ecoli_TEX_replicate1
NC_000913.3	b2196	b2196	1	295	340	86.7647	RNA001_Ecoli_TEX_replicate1
NC_000913.3	b2199	b2199,b2200	2	101	237	42.616	RNA001_Ecoli_TEX_replicate1
NC_000913.3	b2199	b2199	1	106	237	44.7257	RNA001_Ecoli_TEX_replicate1
NC_000913.3	b2200	b2200	1	310	431	71.9258	RNA001_Ecoli_TEX_replicate1
NC_000913.3	b2200	b2199,b2200	2	101	431	23.4339	RNA001_Ecoli_TEX_replicate1
NC_000913.3	b2201	b2201,b2202	2	88	262	33.5878	RNA001_Ecoli_TEX_replicate1
NC_000913.3	b2201	b2201	1	139	262	53.0534	RNA001_Ecoli_TEX_replicate1
NC_000913.3	b2202	b2202	1	58	191	30.3665	RNA001_Ecoli_TEX_replicate1
NC_000913.3	b2202	b2201,b2202	2	88	191	46.0733	RNA001_Ecoli_TEX_replicate1
NC_000913.3	b2203	b2203,b2204	2	56	123	45.5285	RNA001_Ecoli_TEX_replicate1
NC_000913.3	b2204	b2204	1	808	929	86.9752	RNA001_Ecoli_TEX_replicate1
NC_000913.3	b2204	b2203,b2204	2	56	929	6.02799	RNA001_Ecoli_TEX_replicate1
NC_000913.3	b2205	b2205,b2206	2	73	203	35.9606	RNA001_Ecoli_TEX_replicate1
NC_000913.3	b2205	b2205	1	82	203	40.3941	RNA001_Ecoli_TEX_replicate1
NC_000913.3	b2206	b2205,b2206	2	73	391	18.6701	RNA001_Ecoli_TEX_replicate1
NC_000913.3	b2206	b2206	1	286	391	73.1458	RNA001_Ecoli_TEX_replicate1
NC_000913.3	b2208	b2208	1	337	338	99.7041	RNA001_Ecoli_TEX_replicate1
NC_000913.3	b2209	b2209	1	377	378	99.7354	RNA001_Ecoli_TEX_replicate1
NC_000913.3	b2211	b2211	1	84	90	93.3333	RNA001_Ecoli_TEX_replicate1
NC_000913.3	b2212	b2212,b2213	2	42	58	72.4138	RNA001_Ecoli_TEX_replicate1
NC_000913.3	b2213	b2213	1	228	289	78.8927	RNA001_Ecoli_TEX_replicate1
NC_000913.3	b2213	b2212,b2213	2	42	289	14.5329	RNA001_Ecoli_TEX_replicate1
NC_000913.3	b2214	b2214	1	59	83	71.0843	RNA001_Ecoli_TEX_replicate1
NC_000913.3	b2215	b2215	1	3829	3838	99.7655	RNA001_Ecoli_TEX_replicate1
NC_000913.3	b2216	b2216,b2217	2	237	495	47.8788	RNA001_Ecoli_TEX_replicate1
NC_000913.3	b2216	b2216	1	255	495	51.5152	RNA001_Ecoli_TEX_replicate1
NC_000913.3	b2217	b2217	1	111	355	31.2676	RNA001_Ecoli_TEX_replicate1
NC_000913.3	b2217	b2216,b2217	2	237	355	66.7606	RNA001_Ecoli_TEX_replicate1
NC_000913.3	b2218	b2218	1	250	258	96.8992	RNA001_Ecoli_TEX_replicate1
NC_000913.3	b2231	b2231	1	674	675	99.8519	RNA001_Ecoli_TEX_replicate1
NC_000913.3	b2232	b2232	1	485	514	94.358	RNA001_Ecoli_TEX_replicate1
NC_000913.3	b2233	b2233	1	110	139	79.1367	RNA001_Ecoli_TEX_replicate1
NC_000913.3	b2234	b2234	1	174	199	87.4372	RNA001_Ecoli_TEX_replicate1
NC_000913.3	b2235	b2235,b2236	2	44	130	33.8462	RNA001_Ecoli_TEX_replicate1
NC_000913.3	b2235	b2235	1	60	130	46.1538	RNA001_Ecoli_TEX_replicate1
NC_000913.3	b2236	b2235,b2236	2	44	79	55.6962	RNA001_Ecoli_TEX_replicate1
NC_000913.3	b2237	b2237	1	96	107	89.7196	RNA001_Ecoli_TEX_replicate1
NC_000913.3	b2239	b2239,b2240	2	95	428	22.1963	RNA001_Ecoli_TEX_replicate1
NC_000913.3	b2239	b2239	1	315	428	73.5981	RNA001_Ecoli_TEX_replicate1
NC_000913.3	b2240	b2240	1	456	552	82.6087	RNA001_Ecoli_TEX_replicate1
NC_000913.3	b2240	b2239,b2240	2	95	552	17.2101	RNA001_Ecoli_TEX_replicate1
NC_000913.3	b2241	b2241	1	187	232	80.6034	RNA001_Ecoli_TEX_replicate1
NC_000913.3	b2242	b2242	1	144	215	66.9767	RNA001_Ecoli_TEX_replicate1
NC_000913.3	b2243	b2243	1	77	107	71.9626	RNA001_Ecoli_TEX_replicate1
NC_000913.3	b2249	b2249	1	104	113	92.0354	RNA001_Ecoli_TEX_replicate1
NC_000913.3	b2250	b2250	1	257	266	96.6165	RNA001_Ecoli_TEX_replicate1
NC_000913.3	b2260	b2260,b2261	2	78	245	31.8367	RNA001_Ecoli_TEX_replicate1
NC_000913.3	b2260	b2260	1	146	245	59.5918	RNA001_Ecoli_TEX_replicate1
NC_000913.3	b2261	b2261,b2262	2	42	263	15.9696	RNA001_Ecoli_TEX_replicate1
NC_000913.3	b2261	b2261	1	113	263	42.9658	RNA001_Ecoli_TEX_replicate1
NC_000913.3	b2261	b2260,b2261	2	78	263	29.6578	RNA001_Ecoli_TEX_replicate1
NC_000913.3	b2262	b2262	1	68	159	42.7673	RNA001_Ecoli_TEX_replicate1
NC_000913.3	b2262	b2261,b2262	2	42	159	26.4151	RNA001_Ecoli_TEX_replicate1
NC_000913.3	b2264	b2264	1	173	213	81.2207	RNA001_Ecoli_TEX_replicate1
NC_000913.3	b2265	b2265	1	65	71	91.5493	RNA001_Ecoli_TEX_replicate1
NC_000913.3	b2276	b2276	1	464	479	96.8685	RNA001_Ecoli_TEX_replicate1
NC_000913.3	b2277	b2277	1	172	204	84.3137	RNA001_Ecoli_TEX_replicate1
NC_000913.3	b2278	b2278	1	680	716	94.9721	RNA001_Ecoli_TEX_replicate1
NC_000913.3	b2282	b2282	1	101	140	72.1429	RNA001_Ecoli_TEX_replicate1
NC_000913.3	b2283	b2283	1	377	411	91.7275	RNA001_Ecoli_TEX_replicate1
NC_000913.3	b2284	b2284	1	96	132	72.7273	RNA001_Ecoli_TEX_replicate1
NC_000913.3	b2286	b2286	1	89	138	64.4928	RNA001_Ecoli_TEX_replicate1
NC_000913.3	b2287	b2287,b2288	2	52	149	34.8993	RNA001_Ecoli_TEX_replicate1
NC_000913.3	b2287	b2287	1	73	149	48.9933	RNA001_Ecoli_TEX_replicate1
NC_000913.3	b2288	b2287,b2288	2	52	222	23.4234	RNA001_Ecoli_TEX_replicate1
NC_000913.3	b2288	b2288	1	157	222	70.7207	RNA001_Ecoli_TEX_replicate1
NC_000913.3	b2289	b2289	1	104	104	100	RNA001_Ecoli_TEX_replicate1
NC_000913.3	b2290	b2290	1	218	224	97.3214	RNA001_Ecoli_TEX_replicate1
NC_000913.3	b2292	b2292	1	489	512	95.5078	RNA001_Ecoli_TEX_replicate1
NC_000913.3	b2293	b2293	1	233	248	93.9516	RNA001_Ecoli_TEX_replicate1
NC_000913.3	b2295	b2295	1	50	51	98.0392	RNA001_Ecoli_TEX_replicate1
NC_000913.3	b2296	b2296,b2297	2	69	953	7.24029	RNA001_Ecoli_TEX_replicate1
NC_000913.3	b2296	b2296	1	883	953	92.6548	RNA001_Ecoli_TEX_replicate1
NC_000913.3	b2297	b2297	1	279	348	80.1724	RNA001_Ecoli_TEX_replicate1
NC_000913.3	b2297	b2296,b2297	2	69	348	19.8276	RNA001_Ecoli_TEX_replicate1
NC_000913.3	b2298	b2298	1	97	100	97	RNA001_Ecoli_TEX_replicate1
NC_000913.3	b2299	b2299,b2300	2	79	185	42.7027	RNA001_Ecoli_TEX_replicate1
NC_000913.3	b2299	b2299	1	103	185	55.6757	RNA001_Ecoli_TEX_replicate1
NC_000913.3	b2300	b2300	1	192	276	69.5652	RNA001_Ecoli_TEX_replicate1
NC_000913.3	b2300	b2299,b2300	2	79	276	28.6232	RNA001_Ecoli_TEX_replicate1
NC_000913.3	b2304	b2304	1	144	183	78.6885	RNA001_Ecoli_TEX_replicate1
NC_000913.3	b2311	b2311	1	51	53	96.2264	RNA001_Ecoli_TEX_replicate1
NC_000913.3	b2312	b2312	1	106	143	74.1259	RNA001_Ecoli_TEX_replicate1
NC_000913.3	b2313	b2313	1	108	151	71.5232	RNA001_Ecoli_TEX_replicate1
NC_000913.3	b2314	b2314,b2315	2	104	834	12.47	RNA001_Ecoli_TEX_replicate1
NC_000913.3	b2314	b2314	1	719	834	86.211	RNA001_Ecoli_TEX_replicate1
NC_000913.3	b2315	b2315	1	205	334	61.3772	RNA001_Ecoli_TEX_replicate1
NC_000913.3	b2315	b2314,b2315	2	104	334	31.1377	RNA001_Ecoli_TEX_replicate1
NC_000913.3	b2316	b2316,b2317	2	66	794	8.31234	RNA001_Ecoli_TEX_replicate1
NC_000913.3	b2316	b2316	1	697	794	87.7834	RNA001_Ecoli_TEX_replicate1
NC_000913.3	b2317	b2317	1	105	199	52.7638	RNA001_Ecoli_TEX_replicate1
NC_000913.3	b2317	b2316,b2317	2	66	199	33.1658	RNA001_Ecoli_TEX_replicate1
NC_000913.3	b2318	b2318	1	231	281	82.2064	RNA001_Ecoli_TEX_replicate1
NC_000913.3	b2319	b2319	1	74	123	60.1626	RNA001_Ecoli_TEX_replicate1
NC_000913.3	b2320	b2320	1	396	418	94.7368	RNA001_Ecoli_TEX_replicate1
NC_000913.3	b2321	b2321	1	46	68	67.6471	RNA001_Ecoli_TEX_replicate1
NC_000913.3	b2322	b2322	1	72	96	75	RNA001_Ecoli_TEX_replicate1
NC_000913.3	b2323	b2323	1	1954	1956	99.8978	RNA001_Ecoli_TEX_replicate1
NC_000913.3	b2324	b2324	1	78	93	83.871	RNA001_Ecoli_TEX_replicate1
NC_000913.3	b2325	b2325,b2326	2	54	97	55.6701	RNA001_Ecoli_TEX_replicate1
NC_000913.3	b2326	b2326	1	193	276	69.9275	RNA001_Ecoli_TEX_replicate1
NC_000913.3	b2326	b2325,b2326	2	54	276	19.5652	RNA001_Ecoli_TEX_replicate1
NC_000913.3	b2327	b2327	1	152	189	80.4233	RNA001_Ecoli_TEX_replicate1
NC_000913.3	b2328	b2328	1	68	107	63.5514	RNA001_Ecoli_TEX_replicate1
NC_000913.3	b2329	b2329,b2330	2	75	166	45.1807	RNA001_Ecoli_TEX_replicate1
NC_000913.3	b2329	b2329	1	63	166	37.9518	RNA001_Ecoli_TEX_replicate1
NC_000913.3	b2330	b2330	1	231	315	73.3333	RNA001_Ecoli_TEX_replicate1
NC_000913.3	b2330	b2329,b2330	2	75	315	23.8095	RNA001_Ecoli_TEX_replicate1
NC_000913.3	b2332	b2332	1	145	155	93.5484	RNA001_Ecoli_TEX_replicate1
NC_000913.3	b2340	b2340	1	184	194	94.8454	RNA001_Ecoli_TEX_replicate1
NC_000913.3	b2341	b2341	1	71	85	83.5294	RNA001_Ecoli_TEX_replicate1
NC_000913.3	b2343	b2343	1	355	359	98.8858	RNA001_Ecoli_TEX_replicate1
NC_000913.3	b2344	b2344	1	229	229	100	RNA001_Ecoli_TEX_replicate1
NC_000913.3	b2346	b2346	1	370	371	99.7305	RNA001_Ecoli_TEX_replicate1
NC_000913.3	b2351	b2351,b2352	2	83	305	27.2131	RNA001_Ecoli_TEX_replicate1
NC_000913.3	b2351	b2351	1	202	305	66.2295	RNA001_Ecoli_TEX_replicate1
NC_000913.3	b2352	b2352	1	56	142	39.4366	RNA001_Ecoli_TEX_replicate1
NC_000913.3	b2352	b2351,b2352	2	83	142	58.4507	RNA001_Ecoli_TEX_replicate1
NC_000913.3	b2369	b2369	1	59	68	86.7647	RNA001_Ecoli_TEX_replicate1
NC_000913.3	b2370	b2370	1	50	59	84.7458	RNA001_Ecoli_TEX_replicate1
NC_000913.3	b2378	b2378	1	82	82	100	RNA001_Ecoli_TEX_replicate1
NC_000913.3	b2379	b2379	1	107	107	100	RNA001_Ecoli_TEX_replicate1
NC_000913.3	b2380	b2380	1	56	78	71.7949	RNA001_Ecoli_TEX_replicate1
NC_000913.3	b2383	b2383	1	84	86	97.6744	RNA001_Ecoli_TEX_replicate1
NC_000913.3	b2388	b2388	1	219	221	99.095	RNA001_Ecoli_TEX_replicate1
NC_000913.3	b2392	b2392	1	86	87	98.8506	RNA001_Ecoli_TEX_replicate1
NC_000913.3	b2393	b2393	1	140	169	82.8402	RNA001_Ecoli_TEX_replicate1
NC_000913.3	b2395	b2395	1	377	383	98.4334	RNA001_Ecoli_TEX_replicate1
NC_000913.3	b2400	b2400	1	390	400	97.5	RNA001_Ecoli_TEX_replicate1
NC_000913.3	b2405	b2405	1	45	45	100	RNA001_Ecoli_TEX_replicate1
NC_000913.3	b2406	b2406	1	123	123	100	RNA001_Ecoli_TEX_replicate1
NC_000913.3	b2410	b2410,b4546	2	55	150	36.6667	RNA001_Ecoli_TEX_replicate1
NC_000913.3	b2410	b2410	1	89	150	59.3333	RNA001_Ecoli_TEX_replicate1
NC_000913.3	b2411	b2411	1	85	142	59.8592	RNA001_Ecoli_TEX_replicate1
NC_000913.3	b2412	b2412	1	656	678	96.7552	RNA001_Ecoli_TEX_replicate1
NC_000913.3	b2413	b2413	1	54	54	100	RNA001_Ecoli_TEX_replicate1
NC_000913.3	b2414	b2414	1	278	280	99.2857	RNA001_Ecoli_TEX_replicate1
NC_000913.3	b2415	b2415,b2416	2	409	673	60.7727	RNA001_Ecoli_TEX_replicate1
NC_000913.3	b2415	b2415	1	254	673	37.7415	RNA001_Ecoli_TEX_replicate1
NC_000913.3	b2416	b2416,b2417	2	362	2573	14.0692	RNA001_Ecoli_TEX_replicate1
NC_000913.3	b2416	b2416	1	1794	2573	69.7241	RNA001_Ecoli_TEX_replicate1
NC_000913.3	b2416	b2415,b2416	2	409	2573	15.8958	RNA001_Ecoli_TEX_replicate1
NC_000913.3	b2417	b2417	1	790	1176	67.1769	RNA001_Ecoli_TEX_replicate1
NC_000913.3	b2417	b2416,b2417	2	362	1176	30.7823	RNA001_Ecoli_TEX_replicate1
NC_000913.3	b2418	b2418	1	123	139	88.4892	RNA001_Ecoli_TEX_replicate1
NC_000913.3	b2426	b2426	1	332	336	98.8095	RNA001_Ecoli_TEX_replicate1
NC_000913.3	b2431	b2431	1	234	272	86.0294	RNA001_Ecoli_TEX_replicate1
NC_000913.3	b2432	b2432	1	155	205	75.6098	RNA001_Ecoli_TEX_replicate1
NC_000913.3	b2435	b2435	1	101	133	75.9398	RNA001_Ecoli_TEX_replicate1
NC_000913.3	b2436	b2436	1	47	91	51.6484	RNA001_Ecoli_TEX_replicate1
NC_000913.3	b2437	b2437	1	59	80	73.75	RNA001_Ecoli_TEX_replicate1
NC_000913.3	b2450	b2450	1	185	187	98.9305	RNA001_Ecoli_TEX_replicate1
NC_000913.3	b2463	b2463	1	116	118	98.3051	RNA001_Ecoli_TEX_replicate1
NC_000913.3	b2465	b2465	1	52	55	94.5455	RNA001_Ecoli_TEX_replicate1
NC_000913.3	b2468	b2468	1	202	209	96.6507	RNA001_Ecoli_TEX_replicate1
NC_000913.3	b2469	b2469	1	96	97	98.9691	RNA001_Ecoli_TEX_replicate1
NC_000913.3	b2470	b2470	1	93	94	98.9362	RNA001_Ecoli_TEX_replicate1
NC_000913.3	b2471	b2471	1	42	59	71.1864	RNA001_Ecoli_TEX_replicate1
NC_000913.3	b2472	b2472,b4547	2	47	113	41.5929	RNA001_Ecoli_TEX_replicate1
NC_000913.3	b2472	b2472	1	46	113	40.708	RNA001_Ecoli_TEX_replicate1
NC_000913.3	b2473	b2473	1	42	63	66.6667	RNA001_Ecoli_TEX_replicate1
NC_000913.3	b2474	b2474,b2475	2	62	273	22.7106	RNA001_Ecoli_TEX_replicate1
NC_000913.3	b2474	b2474	1	198	273	72.5275	RNA001_Ecoli_TEX_replicate1
NC_000913.3	b2475	b2475	1	153	219	69.863	RNA001_Ecoli_TEX_replicate1
NC_000913.3	b2475	b2474,b2475	2	62	219	28.3105	RNA001_Ecoli_TEX_replicate1
NC_000913.3	b2476	b2476	1	134	140	95.7143	RNA001_Ecoli_TEX_replicate1
NC_000913.3	b2477	b2477,b2478	2	130	434	29.9539	RNA001_Ecoli_TEX_replicate1
NC_000913.3	b2477	b2477	1	301	434	69.3548	RNA001_Ecoli_TEX_replicate1
NC_000913.3	b2478	b2478	1	256	387	66.1499	RNA001_Ecoli_TEX_replicate1
NC_000913.3	b2478	b2477,b2478	2	130	387	33.5917	RNA001_Ecoli_TEX_replicate1
NC_000913.3	b2479	b2479,b2480	2	62	209	29.6651	RNA001_Ecoli_TEX_replicate1
NC_000913.3	b2479	b2479	1	147	209	70.3349	RNA001_Ecoli_TEX_replicate1
NC_000913.3	b2480	b2479,b2480	2	62	225	27.5556	RNA001_Ecoli_TEX_replicate1
NC_000913.3	b2480	b2480	1	162	225	72	RNA001_Ecoli_TEX_replicate1
NC_000913.3	b2482	b2482	1	42	42	100	RNA001_Ecoli_TEX_replicate1
NC_000913.3	b2493	b2493	1	228	245	93.0612	RNA001_Ecoli_TEX_replicate1
NC_000913.3	b2494	b2494,b2495	2	50	954	5.24109	RNA001_Ecoli_TEX_replicate1
NC_000913.3	b2494	b2494	1	900	954	94.3396	RNA001_Ecoli_TEX_replicate1
NC_000913.3	b2495	b2495,b2496	2	56	552	10.1449	RNA001_Ecoli_TEX_replicate1
NC_000913.3	b2495	b2495	1	442	552	80.0725	RNA001_Ecoli_TEX_replicate1
NC_000913.3	b2495	b2494,b2495	2	50	552	9.05797	RNA001_Ecoli_TEX_replicate1
NC_000913.3	b2496	b2496	1	953	1027	92.7945	RNA001_Ecoli_TEX_replicate1
NC_000913.3	b2496	b2495,b2496	2	56	1027	5.45278	RNA001_Ecoli_TEX_replicate1
NC_000913.3	b2497	b2497	1	90	105	85.7143	RNA001_Ecoli_TEX_replicate1
NC_000913.3	b2498	b2498	1	421	423	99.5272	RNA001_Ecoli_TEX_replicate1
NC_000913.3	b2499	b2499	1	117	151	77.4834	RNA001_Ecoli_TEX_replicate1
NC_000913.3	b2501	b2501	1	247	259	95.3668	RNA001_Ecoli_TEX_replicate1
NC_000913.3	b2502	b2502	1	135	153	88.2353	RNA001_Ecoli_TEX_replicate1
NC_000913.3	b2503	b2503	1	71	78	91.0256	RNA001_Ecoli_TEX_replicate1
NC_000913.3	b2507	b2507	1	281	296	94.9324	RNA001_Ecoli_TEX_replicate1
NC_000913.3	b2508	b2508	1	297	312	95.1923	RNA001_Ecoli_TEX_replicate1
NC_000913.3	b2509	b2509	1	132	142	92.9577	RNA001_Ecoli_TEX_replicate1
NC_000913.3	b2511	b2511	1	129	171	75.4386	RNA001_Ecoli_TEX_replicate1
NC_000913.3	b2512	b2512	1	315	392	80.3571	RNA001_Ecoli_TEX_replicate1
NC_000913.3	b2513	b2513,b2514	2	207	351	58.9744	RNA001_Ecoli_TEX_replicate1
NC_000913.3	b2513	b2513	1	82	351	23.3618	RNA001_Ecoli_TEX_replicate1
NC_000913.3	b2514	b2514	1	416	678	61.3569	RNA001_Ecoli_TEX_replicate1
NC_000913.3	b2514	b2513,b2514	2	207	678	30.531	RNA001_Ecoli_TEX_replicate1
NC_000913.3	b2515	b2515	1	263	316	83.2278	RNA001_Ecoli_TEX_replicate1
NC_000913.3	b2516	b2516	1	263	306	85.9477	RNA001_Ecoli_TEX_replicate1
NC_000913.3	b2517	b2517	1	361	377	95.756	RNA001_Ecoli_TEX_replicate1
NC_000913.3	b2518	b2518	1	55	56	98.2143	RNA001_Ecoli_TEX_replicate1
NC_000913.3	b2519	b2519	1	68	91	74.7253	RNA001_Ecoli_TEX_replicate1
NC_000913.3	b2520	b2520	1	557	579	96.2003	RNA001_Ecoli_TEX_replicate1
NC_000913.3	b2522	b2522	1	46	77	59.7403	RNA001_Ecoli_TEX_replicate1
NC_000913.3	b2523	b2523	1	129	140	92.1429	RNA001_Ecoli_TEX_replicate1
NC_000913.3	b2526	b2526	1	174	212	82.0755	RNA001_Ecoli_TEX_replicate1
NC_000913.3	b2528	b2528	1	46	98	46.9388	RNA001_Ecoli_TEX_replicate1
NC_000913.3	b2530	b2530	1	106	156	67.9487	RNA001_Ecoli_TEX_replicate1
NC_000913.3	b2532	b2532	1	223	227	98.2379	RNA001_Ecoli_TEX_replicate1
NC_000913.3	b2533	b2533	1	1045	1049	99.6187	RNA001_Ecoli_TEX_replicate1
NC_000913.3	b2536	b2536	1	51	77	66.2338	RNA001_Ecoli_TEX_replicate1
NC_000913.3	b2538	b2538	1	284	293	96.9283	RNA001_Ecoli_TEX_replicate1
NC_000913.3	b2550	b2550	1	84	86	97.6744	RNA001_Ecoli_TEX_replicate1
NC_000913.3	b2551	b2551	1	320	322	99.3789	RNA001_Ecoli_TEX_replicate1
NC_000913.3	b2552	b2552	1	90	100	90	RNA001_Ecoli_TEX_replicate1
NC_000913.3	b2553	b2553	1	189	208	90.8654	RNA001_Ecoli_TEX_replicate1
NC_000913.3	b2555	b2555	1	87	142	61.2676	RNA001_Ecoli_TEX_replicate1
NC_000913.3	b2556	b2556	1	214	260	82.3077	RNA001_Ecoli_TEX_replicate1
NC_000913.3	b2557	b2557	1	148	148	100	RNA001_Ecoli_TEX_replicate1
NC_000913.3	b2558	b2558,b2559	2	89	146	60.9589	RNA001_Ecoli_TEX_replicate1
NC_000913.3	b2558	b2558	1	54	146	36.9863	RNA001_Ecoli_TEX_replicate1
NC_000913.3	b2559	b2559	1	170	277	61.3718	RNA001_Ecoli_TEX_replicate1
NC_000913.3	b2559	b2558,b2559	2	89	277	32.13	RNA001_Ecoli_TEX_replicate1
NC_000913.3	b2561	b2561	1	132	157	84.0764	RNA001_Ecoli_TEX_replicate1
NC_000913.3	b2562	b2562	1	341	366	93.1694	RNA001_Ecoli_TEX_replicate1
NC_000913.3	b2565	b2565,b2566	2	61	132	46.2121	RNA001_Ecoli_TEX_replicate1
NC_000913.3	b2565	b2565	1	45	132	34.0909	RNA001_Ecoli_TEX_replicate1
NC_000913.3	b2566	b2566,b2567	2	106	340	31.1765	RNA001_Ecoli_TEX_replicate1
NC_000913.3	b2566	b2565,b2566	2	61	340	17.9412	RNA001_Ecoli_TEX_replicate1
NC_000913.3	b2566	b2566	1	155	340	45.5882	RNA001_Ecoli_TEX_replicate1
NC_000913.3	b2567	b2567	1	426	549	77.5956	RNA001_Ecoli_TEX_replicate1
NC_000913.3	b2567	b2566,b2567	2	106	549	19.3078	RNA001_Ecoli_TEX_replicate1
NC_000913.3	b2568	b2568,b2569	2	61	283	21.5548	RNA001_Ecoli_TEX_replicate1
NC_000913.3	b2568	b2568	1	222	283	78.4452	RNA001_Ecoli_TEX_replicate1
NC_000913.3	b2569	b2569	1	164	230	71.3043	RNA001_Ecoli_TEX_replicate1
NC_000913.3	b2569	b2568,b2569	2	61	230	26.5217	RNA001_Ecoli_TEX_replicate1
NC_000913.3	b2570	b2570	1	213	225	94.6667	RNA001_Ecoli_TEX_replicate1
NC_000913.3	b2571	b2571	1	44	99	44.4444	RNA001_Ecoli_TEX_replicate1
NC_000913.3	b2572	b2572,b2573	2	164	317	51.735	RNA001_Ecoli_TEX_replicate1
NC_000913.3	b2572	b2572	1	94	317	29.653	RNA001_Ecoli_TEX_replicate1
NC_000913.3	b2573	b2573	1	183	422	43.3649	RNA001_Ecoli_TEX_replicate1
NC_000913.3	b2573	b2572,b2573	2	164	422	38.8626	RNA001_Ecoli_TEX_replicate1
NC_000913.3	b2574	b2574,b2575	2	103	171	60.2339	RNA001_Ecoli_TEX_replicate1
NC_000913.3	b2574	b2574	1	68	171	39.7661	RNA001_Ecoli_TEX_replicate1
NC_000913.3	b2575	b2574,b2575	2	103	393	26.2087	RNA001_Ecoli_TEX_replicate1
NC_000913.3	b2575	b2575	1	290	393	73.7913	RNA001_Ecoli_TEX_replicate1
NC_000913.3	b2576	b2576	1	186	189	98.4127	RNA001_Ecoli_TEX_replicate1
NC_000913.3	b2578	b2578	1	60	73	82.1918	RNA001_Ecoli_TEX_replicate1
NC_000913.3	b2579	b2579	1	1026	1039	98.7488	RNA001_Ecoli_TEX_replicate1
NC_000913.3	b2580	b2580,b2581	2	49	193	25.3886	RNA001_Ecoli_TEX_replicate1
NC_000913.3	b2580	b2580	1	144	193	74.6114	RNA001_Ecoli_TEX_replicate1
NC_000913.3	b2581	b2581	1	469	522	89.8467	RNA001_Ecoli_TEX_replicate1
NC_000913.3	b2581	b2580,b2581	2	49	522	9.38697	RNA001_Ecoli_TEX_replicate1
NC_000913.3	b2582	b2582	1	60	64	93.75	RNA001_Ecoli_TEX_replicate1
NC_000913.3	b2584	b2584	1	102	121	84.2975	RNA001_Ecoli_TEX_replicate1
NC_000913.3	b2585	b2585	1	384	407	94.3489	RNA001_Ecoli_TEX_replicate1
NC_000913.3	b2586	b2586,b2587	2	43	70	61.4286	RNA001_Ecoli_TEX_replicate1
NC_000913.3	b2587	b2587	1	208	253	82.2134	RNA001_Ecoli_TEX_replicate1
NC_000913.3	b2587	b2586,b2587	2	43	253	16.996	RNA001_Ecoli_TEX_replicate1
NC_000913.3	b2592	b2592	1	1060	1065	99.5305	RNA001_Ecoli_TEX_replicate1
NC_000913.3	b2593	b2593	1	57	105	54.2857	RNA001_Ecoli_TEX_replicate1
NC_000913.3	b2595	b2595	1	279	304	91.7763	RNA001_Ecoli_TEX_replicate1
NC_000913.3	b2597	b2597	1	367	367	100	RNA001_Ecoli_TEX_replicate1
NC_000913.3	b2599	b2599	1	42	63	66.6667	RNA001_Ecoli_TEX_replicate1
NC_000913.3	b2600	b2600	1	552	607	90.939	RNA001_Ecoli_TEX_replicate1
NC_000913.3	b2601	b2601	1	107	146	73.2877	RNA001_Ecoli_TEX_replicate1
NC_000913.3	b2603	b2603	1	90	104	86.5385	RNA001_Ecoli_TEX_replicate1
NC_000913.3	b2606	b2606,b2607,b2608,b2609	4	176	1159	15.1855	RNA001_Ecoli_TEX_replicate1
NC_000913.3	b2606	b2606,b2607,b2608	3	58	1159	5.00431	RNA001_Ecoli_TEX_replicate1
NC_000913.3	b2606	b2606,b2607	2	389	1159	33.5634	RNA001_Ecoli_TEX_replicate1
NC_000913.3	b2606	b2606	1	525	1159	45.2977	RNA001_Ecoli_TEX_replicate1
NC_000913.3	b2607	b2606,b2607,b2608,b2609	4	176	1376	12.7907	RNA001_Ecoli_TEX_replicate1
NC_000913.3	b2607	b2607,b2608,b2609	3	328	1376	23.8372	RNA001_Ecoli_TEX_replicate1
NC_000913.3	b2607	b2606,b2607,b2608	3	58	1376	4.21512	RNA001_Ecoli_TEX_replicate1
NC_000913.3	b2607	b2607,b2608	2	66	1376	4.79651	RNA001_Ecoli_TEX_replicate1
NC_000913.3	b2607	b2607	1	349	1376	25.3634	RNA001_Ecoli_TEX_replicate1
NC_000913.3	b2607	b2606,b2607	2	389	1376	28.2703	RNA001_Ecoli_TEX_replicate1
NC_000913.3	b2608	b2608,b2609	2	871	1625	53.6	RNA001_Ecoli_TEX_replicate1
NC_000913.3	b2608	b2606,b2607,b2608,b2609	4	176	1625	10.8308	RNA001_Ecoli_TEX_replicate1
NC_000913.3	b2608	b2607,b2608,b2609	3	328	1625	20.1846	RNA001_Ecoli_TEX_replicate1
NC_000913.3	b2608	b2606,b2607,b2608	3	58	1625	3.56923	RNA001_Ecoli_TEX_replicate1
NC_000913.3	b2608	b2607,b2608	2	66	1625	4.06154	RNA001_Ecoli_TEX_replicate1
NC_000913.3	b2608	b2608	1	116	1625	7.13846	RNA001_Ecoli_TEX_replicate1
NC_000913.3	b2609	b2609	1	793	2186	36.2763	RNA001_Ecoli_TEX_replicate1
NC_000913.3	b2609	b2608,b2609	2	871	2186	39.8445	RNA001_Ecoli_TEX_replicate1
NC_000913.3	b2609	b2606,b2607,b2608,b2609	4	176	2186	8.05124	RNA001_Ecoli_TEX_replicate1
NC_000913.3	b2609	b2607,b2608,b2609	3	328	2186	15.0046	RNA001_Ecoli_TEX_replicate1
NC_000913.3	b2610	b2610	1	379	395	95.9494	RNA001_Ecoli_TEX_replicate1
NC_000913.3	b2614	b2614	1	403	430	93.7209	RNA001_Ecoli_TEX_replicate1
NC_000913.3	b2615	b2615	1	109	111	98.1982	RNA001_Ecoli_TEX_replicate1
NC_000913.3	b2617	b2617	1	159	174	91.3793	RNA001_Ecoli_TEX_replicate1
NC_000913.3	b2618	b2618,b2619	2	177	240	73.75	RNA001_Ecoli_TEX_replicate1
NC_000913.3	b2618	b2618	1	49	240	20.4167	RNA001_Ecoli_TEX_replicate1
NC_000913.3	b2619	b2619	1	197	383	51.436	RNA001_Ecoli_TEX_replicate1
NC_000913.3	b2619	b2618,b2619	2	177	383	46.2141	RNA001_Ecoli_TEX_replicate1
NC_000913.3	b2620	b2620	1	95	97	97.9381	RNA001_Ecoli_TEX_replicate1
NC_000913.3	b2621	b2621	1	4475	4476	99.9777	RNA001_Ecoli_TEX_replicate1
NC_000913.3	b2622	b2622	1	292	293	99.6587	RNA001_Ecoli_TEX_replicate1
NC_000913.3	b2627	b2627	1	51	61	83.6066	RNA001_Ecoli_TEX_replicate1
NC_000913.3	b2628	b2628	1	468	480	97.5	RNA001_Ecoli_TEX_replicate1
NC_000913.3	b2630	b2630,b2631	2	49	149	32.8859	RNA001_Ecoli_TEX_replicate1
NC_000913.3	b2630	b2630	1	99	149	66.443	RNA001_Ecoli_TEX_replicate1
NC_000913.3	b2631	b2630,b2631	2	49	83	59.0361	RNA001_Ecoli_TEX_replicate1
NC_000913.3	b2641	b2641	1	104	114	91.2281	RNA001_Ecoli_TEX_replicate1
NC_000913.3	b2647	b2647	1	128	128	100	RNA001_Ecoli_TEX_replicate1
NC_000913.3	b2666	b2666	1	48	64	75	RNA001_Ecoli_TEX_replicate1
NC_000913.3	b2669	b2669	1	440	465	94.6237	RNA001_Ecoli_TEX_replicate1
NC_000913.3	b2678	b2678	1	45	51	88.2353	RNA001_Ecoli_TEX_replicate1
NC_000913.3	b2679	b2679	1	78	80	97.5	RNA001_Ecoli_TEX_replicate1
NC_000913.3	b2682	b2682	1	157	172	91.2791	RNA001_Ecoli_TEX_replicate1
NC_000913.3	b2684	b2684	1	156	160	97.5	RNA001_Ecoli_TEX_replicate1
NC_000913.3	b2686	b2686	1	116	141	82.2695	RNA001_Ecoli_TEX_replicate1
NC_000913.3	b2687	b2687,b2688	2	84	247	34.0081	RNA001_Ecoli_TEX_replicate1
NC_000913.3	b2687	b2687	1	140	247	56.6802	RNA001_Ecoli_TEX_replicate1
NC_000913.3	b2688	b2688,b2689	2	64	544	11.7647	RNA001_Ecoli_TEX_replicate1
NC_000913.3	b2688	b2688	1	381	544	70.0368	RNA001_Ecoli_TEX_replicate1
NC_000913.3	b2688	b2687,b2688	2	84	544	15.4412	RNA001_Ecoli_TEX_replicate1
NC_000913.3	b2689	b2689	1	80	164	48.7805	RNA001_Ecoli_TEX_replicate1
NC_000913.3	b2689	b2688,b2689	2	64	164	39.0244	RNA001_Ecoli_TEX_replicate1
NC_000913.3	b2696	b2696,b2697	2	275	954	28.826	RNA001_Ecoli_TEX_replicate1
NC_000913.3	b2696	b2696	1	679	954	71.174	RNA001_Ecoli_TEX_replicate1
NC_000913.3	b2697	b2697	1	848	1124	75.4448	RNA001_Ecoli_TEX_replicate1
NC_000913.3	b2697	b2696,b2697	2	275	1124	24.4662	RNA001_Ecoli_TEX_replicate1
NC_000913.3	b2699	b2699	1	261	282	92.5532	RNA001_Ecoli_TEX_replicate1
NC_000913.3	b2708	b2708	1	64	97	65.9794	RNA001_Ecoli_TEX_replicate1
NC_000913.3	b2709	b2709	1	67	84	79.7619	RNA001_Ecoli_TEX_replicate1
NC_000913.3	b2712	b2712	1	410	427	96.0187	RNA001_Ecoli_TEX_replicate1
NC_000913.3	b2714	b2714	1	91	92	98.913	RNA001_Ecoli_TEX_replicate1
NC_000913.3	b2715	b2715	1	42	45	93.3333	RNA001_Ecoli_TEX_replicate1
NC_000913.3	b2716	b2716	1	49	54	90.7407	RNA001_Ecoli_TEX_replicate1
NC_000913.3	b2726	b2726	1	50	109	45.8716	RNA001_Ecoli_TEX_replicate1
NC_000913.3	b2729	b2729,b2730	2	42	151	27.8146	RNA001_Ecoli_TEX_replicate1
NC_000913.3	b2729	b2729	1	85	151	56.2914	RNA001_Ecoli_TEX_replicate1
NC_000913.3	b2730	b2730,b2731	2	99	749	13.2176	RNA001_Ecoli_TEX_replicate1
NC_000913.3	b2730	b2730	1	600	749	80.1068	RNA001_Ecoli_TEX_replicate1
NC_000913.3	b2730	b2729,b2730	2	42	749	5.60748	RNA001_Ecoli_TEX_replicate1
NC_000913.3	b2731	b2731	1	75	179	41.8994	RNA001_Ecoli_TEX_replicate1
NC_000913.3	b2731	b2730,b2731	2	99	179	55.3073	RNA001_Ecoli_TEX_replicate1
NC_000913.3	b2733	b2733	1	118	118	100	RNA001_Ecoli_TEX_replicate1
NC_000913.3	b2735	b2735	1	53	57	92.9825	RNA001_Ecoli_TEX_replicate1
NC_000913.3	b2740	b2740	1	85	92	92.3913	RNA001_Ecoli_TEX_replicate1
NC_000913.3	b2741	b2741,b2742	2	70	728	9.61538	RNA001_Ecoli_TEX_replicate1
NC_000913.3	b2741	b2741	1	651	728	89.4231	RNA001_Ecoli_TEX_replicate1
NC_000913.3	b2742	b2742	1	214	299	71.5719	RNA001_Ecoli_TEX_replicate1
NC_000913.3	b2742	b2741,b2742	2	70	299	23.4114	RNA001_Ecoli_TEX_replicate1
NC_000913.3	b2743	b2743,b2744	2	64	131	48.855	RNA001_Ecoli_TEX_replicate1
NC_000913.3	b2743	b2743	1	48	131	36.6412	RNA001_Ecoli_TEX_replicate1
NC_000913.3	b2744	b2744	1	324	419	77.327	RNA001_Ecoli_TEX_replicate1
NC_000913.3	b2744	b2743,b2744	2	64	419	15.2745	RNA001_Ecoli_TEX_replicate1
NC_000913.3	b2745	b2745	1	119	173	68.7861	RNA001_Ecoli_TEX_replicate1
NC_000913.3	b2746	b2746	1	47	111	42.3423	RNA001_Ecoli_TEX_replicate1
NC_000913.3	b2747	b2747,b2748	2	140	228	61.4035	RNA001_Ecoli_TEX_replicate1
NC_000913.3	b2748	b2748	1	356	541	65.8041	RNA001_Ecoli_TEX_replicate1
NC_000913.3	b2748	b2747,b2748	2	140	541	25.878	RNA001_Ecoli_TEX_replicate1
NC_000913.3	b2749	b2749	1	65	92	70.6522	RNA001_Ecoli_TEX_replicate1
NC_000913.3	b2750	b2750	1	78	93	83.871	RNA001_Ecoli_TEX_replicate1
NC_000913.3	b2753	b2753	1	98	98	100	RNA001_Ecoli_TEX_replicate1
NC_000913.3	b2754	b2754	1	108	123	87.8049	RNA001_Ecoli_TEX_replicate1
NC_000913.3	b2765	b2765	1	214	248	86.2903	RNA001_Ecoli_TEX_replicate1
NC_000913.3	b2766	b2766	1	410	446	91.9283	RNA001_Ecoli_TEX_replicate1
NC_000913.3	b2769	b2769	1	47	61	77.0492	RNA001_Ecoli_TEX_replicate1
NC_000913.3	b2777	b2777	1	101	101	100	RNA001_Ecoli_TEX_replicate1
NC_000913.3	b2779	b2779,b2780	2	178	575	30.9565	RNA001_Ecoli_TEX_replicate1
NC_000913.3	b2779	b2779	1	396	575	68.8696	RNA001_Ecoli_TEX_replicate1
NC_000913.3	b2780	b2780	1	1183	1376	85.9738	RNA001_Ecoli_TEX_replicate1
NC_000913.3	b2780	b2779,b2780	2	178	1376	12.936	RNA001_Ecoli_TEX_replicate1
NC_000913.3	b2781	b2781	1	146	167	87.4251	RNA001_Ecoli_TEX_replicate1
NC_000913.3	b2783	b2783	1	43	93	46.2366	RNA001_Ecoli_TEX_replicate1
NC_000913.3	b2784	b2784,b2785	2	113	392	28.8265	RNA001_Ecoli_TEX_replicate1
NC_000913.3	b2784	b2784	1	263	392	67.0918	RNA001_Ecoli_TEX_replicate1
NC_000913.3	b2785	b2785	1	106	228	46.4912	RNA001_Ecoli_TEX_replicate1
NC_000913.3	b2785	b2784,b2785	2	113	228	49.5614	RNA001_Ecoli_TEX_replicate1
NC_000913.3	b2786	b2786	1	187	199	93.9698	RNA001_Ecoli_TEX_replicate1
NC_000913.3	b2787	b2787	1	138	144	95.8333	RNA001_Ecoli_TEX_replicate1
NC_000913.3	b2793	b2793	1	90	92	97.8261	RNA001_Ecoli_TEX_replicate1
NC_000913.3	b2795	b2795	1	321	321	100	RNA001_Ecoli_TEX_replicate1
NC_000913.3	b2796	b2796,b2797	2	66	503	13.1213	RNA001_Ecoli_TEX_replicate1
NC_000913.3	b2796	b2796	1	436	503	86.6799	RNA001_Ecoli_TEX_replicate1
NC_000913.3	b2797	b2797	1	842	931	90.4404	RNA001_Ecoli_TEX_replicate1
NC_000913.3	b2797	b2796,b2797	2	66	931	7.08915	RNA001_Ecoli_TEX_replicate1
NC_000913.3	b2798	b2798	1	68	110	61.8182	RNA001_Ecoli_TEX_replicate1
NC_000913.3	b2799	b2799	1	93	130	71.5385	RNA001_Ecoli_TEX_replicate1
NC_000913.3	b2800	b2800	1	43	61	70.4918	RNA001_Ecoli_TEX_replicate1
NC_000913.3	b2806	b2806	1	180	241	74.6888	RNA001_Ecoli_TEX_replicate1
NC_000913.3	b2808	b2808	1	181	209	86.6029	RNA001_Ecoli_TEX_replicate1
NC_000913.3	b2810	b2810,b2811	2	56	283	19.788	RNA001_Ecoli_TEX_replicate1
NC_000913.3	b2810	b2810	1	221	283	78.0919	RNA001_Ecoli_TEX_replicate1
NC_000913.3	b2811	b2811,b2812	2	59	535	11.028	RNA001_Ecoli_TEX_replicate1
NC_000913.3	b2811	b2811	1	412	535	77.0093	RNA001_Ecoli_TEX_replicate1
NC_000913.3	b2811	b2810,b2811	2	56	535	10.4673	RNA001_Ecoli_TEX_replicate1
NC_000913.3	b2812	b2812	1	154	231	66.6667	RNA001_Ecoli_TEX_replicate1
NC_000913.3	b2812	b2811,b2812	2	59	231	25.5411	RNA001_Ecoli_TEX_replicate1
NC_000913.3	b2813	b2813	1	298	312	95.5128	RNA001_Ecoli_TEX_replicate1
NC_000913.3	b2817	b2817	1	194	196	98.9796	RNA001_Ecoli_TEX_replicate1
NC_000913.3	b2819	b2819	1	132	142	92.9577	RNA001_Ecoli_TEX_replicate1
NC_000913.3	b2820	b2820	1	101	138	73.1884	RNA001_Ecoli_TEX_replicate1
NC_000913.3	b2821	b2821	1	154	190	81.0526	RNA001_Ecoli_TEX_replicate1
NC_000913.3	b2822	b2822	1	392	401	97.7556	RNA001_Ecoli_TEX_replicate1
NC_000913.3	b2827	b2827	1	67	78	85.8974	RNA001_Ecoli_TEX_replicate1
NC_000913.3	b2828	b2828	1	49	72	68.0556	RNA001_Ecoli_TEX_replicate1
NC_000913.3	b2829	b2829	1	287	338	84.9112	RNA001_Ecoli_TEX_replicate1
NC_000913.3	b2830	b2830	1	109	148	73.6486	RNA001_Ecoli_TEX_replicate1
NC_000913.3	b2832	b2832	1	81	92	88.0435	RNA001_Ecoli_TEX_replicate1
NC_000913.3	b2833	b2833	1	73	78	93.5897	RNA001_Ecoli_TEX_replicate1
NC_000913.3	b2834	b2834	1	54	65	83.0769	RNA001_Ecoli_TEX_replicate1
NC_000913.3	b2835	b2835	1	313	331	94.5619	RNA001_Ecoli_TEX_replicate1
NC_000913.3	b2836	b2836	1	94	104	90.3846	RNA001_Ecoli_TEX_replicate1
NC_000913.3	b2837	b2837	1	92	99	92.9293	RNA001_Ecoli_TEX_replicate1
NC_000913.3	b2839	b2839,b2840	2	63	145	43.4483	RNA001_Ecoli_TEX_replicate1
NC_000913.3	b2839	b2839	1	82	145	56.5517	RNA001_Ecoli_TEX_replicate1
NC_000913.3	b2840	b2840	1	193	260	74.2308	RNA001_Ecoli_TEX_replicate1
NC_000913.3	b2840	b2839,b2840	2	63	260	24.2308	RNA001_Ecoli_TEX_replicate1
NC_000913.3	b2841	b2841	1	112	116	96.5517	RNA001_Ecoli_TEX_replicate1
NC_000913.3	b2844	b2844	1	44	47	93.617	RNA001_Ecoli_TEX_replicate1
NC_000913.3	b2845	b2845	1	164	167	98.2036	RNA001_Ecoli_TEX_replicate1
NC_000913.3	b2865	b2865	1	94	94	100	RNA001_Ecoli_TEX_replicate1
NC_000913.3	b2869	b2869	1	134	135	99.2593	RNA001_Ecoli_TEX_replicate1
NC_000913.3	b2875	b2875	1	115	122	94.2623	RNA001_Ecoli_TEX_replicate1
NC_000913.3	b2881	b2881	1	55	56	98.2143	RNA001_Ecoli_TEX_replicate1
NC_000913.3	b2889	b2889	1	48	66	72.7273	RNA001_Ecoli_TEX_replicate1
NC_000913.3	b2890	b2890	1	126	176	71.5909	RNA001_Ecoli_TEX_replicate1
NC_000913.3	b2891	b2891,b2891	1	127	168	75.5952	RNA001_Ecoli_TEX_replicate1
NC_000913.3	b2891	b2891,b2891	1	127	168	75.5952	RNA001_Ecoli_TEX_replicate1
NC_000913.3	b2892	b2892	1	181	217	83.4101	RNA001_Ecoli_TEX_replicate1
NC_000913.3	b2893	b2893	1	48	82	58.5366	RNA001_Ecoli_TEX_replicate1
NC_000913.3	b2894	b2894	1	62	76	81.5789	RNA001_Ecoli_TEX_replicate1
NC_000913.3	b2895	b2895	1	173	211	81.9905	RNA001_Ecoli_TEX_replicate1
NC_000913.3	b2896	b2896,b2897	2	133	232	57.3276	RNA001_Ecoli_TEX_replicate1
NC_000913.3	b2896	b2896	1	62	232	26.7241	RNA001_Ecoli_TEX_replicate1
NC_000913.3	b2897	b2897	1	132	283	46.6431	RNA001_Ecoli_TEX_replicate1
NC_000913.3	b2897	b2896,b2897	2	133	283	46.9965	RNA001_Ecoli_TEX_replicate1
NC_000913.3	b2898	b2898	1	186	223	83.4081	RNA001_Ecoli_TEX_replicate1
NC_000913.3	b2899	b2899	1	487	557	87.4327	RNA001_Ecoli_TEX_replicate1
NC_000913.3	b2900	b2900	1	48	87	55.1724	RNA001_Ecoli_TEX_replicate1
NC_000913.3	b2901	b2901	1	174	188	92.5532	RNA001_Ecoli_TEX_replicate1
NC_000913.3	b2903	b2903	1	106	111	95.4955	RNA001_Ecoli_TEX_replicate1
NC_000913.3	b2906	b2906	1	85	105	80.9524	RNA001_Ecoli_TEX_replicate1
NC_000913.3	b2907	b2907	1	93	149	62.4161	RNA001_Ecoli_TEX_replicate1
NC_000913.3	b2908	b2908	1	170	217	78.341	RNA001_Ecoli_TEX_replicate1
NC_000913.3	b2909	b2909	1	63	72	87.5	RNA001_Ecoli_TEX_replicate1
NC_000913.3	b2910	b2910,b2911	2	245	432	56.713	RNA001_Ecoli_TEX_replicate1
NC_000913.3	b2910	b2910	1	182	432	42.1296	RNA001_Ecoli_TEX_replicate1
NC_000913.3	b2911	b2911,b2912	2	55	1758	3.12856	RNA001_Ecoli_TEX_replicate1
NC_000913.3	b2911	b2911	1	1453	1758	82.6507	RNA001_Ecoli_TEX_replicate1
NC_000913.3	b2911	b2910,b2911	2	245	1758	13.9363	RNA001_Ecoli_TEX_replicate1
NC_000913.3	b2912	b2911,b2912	2	55	90	61.1111	RNA001_Ecoli_TEX_replicate1
NC_000913.3	b2913	b2913	1	931	935	99.5722	RNA001_Ecoli_TEX_replicate1
NC_000913.3	b2914	b2914	1	318	320	99.375	RNA001_Ecoli_TEX_replicate1
NC_000913.3	b2916	b2916	1	56	56	100	RNA001_Ecoli_TEX_replicate1
NC_000913.3	b2922	b2922	1	63	104	60.5769	RNA001_Ecoli_TEX_replicate1
NC_000913.3	b2923	b2923	1	244	306	79.7386	RNA001_Ecoli_TEX_replicate1
NC_000913.3	b2924	b2924	1	872	894	97.5391	RNA001_Ecoli_TEX_replicate1
NC_000913.3	b2925	b2925,b2926	2	52	1618	3.21384	RNA001_Ecoli_TEX_replicate1
NC_000913.3	b2925	b2925	1	1562	1618	96.5389	RNA001_Ecoli_TEX_replicate1
NC_000913.3	b2926	b2926,b2927	2	53	1906	2.78069	RNA001_Ecoli_TEX_replicate1
NC_000913.3	b2926	b2926	1	1798	1906	94.3337	RNA001_Ecoli_TEX_replicate1
NC_000913.3	b2926	b2925,b2926	2	52	1906	2.72823	RNA001_Ecoli_TEX_replicate1
NC_000913.3	b2927	b2927	1	493	552	89.3116	RNA001_Ecoli_TEX_replicate1
NC_000913.3	b2927	b2926,b2927	2	53	552	9.60145	RNA001_Ecoli_TEX_replicate1
NC_000913.3	b2928	b2928	1	60	78	76.9231	RNA001_Ecoli_TEX_replicate1
NC_000913.3	b2935	b2935	1	507	507	100	RNA001_Ecoli_TEX_replicate1
NC_000913.3	b2936	b2936	1	68	87	78.1609	RNA001_Ecoli_TEX_replicate1
NC_000913.3	b2937	b2937	1	167	189	88.3598	RNA001_Ecoli_TEX_replicate1
NC_000913.3	b2938	b2938	1	591	620	95.3226	RNA001_Ecoli_TEX_replicate1
NC_000913.3	b2942	b2942	1	176	176	100	RNA001_Ecoli_TEX_replicate1
NC_000913.3	b2943	b2943	1	155	155	100	RNA001_Ecoli_TEX_replicate1
NC_000913.3	b2946	b2946	1	83	117	70.9402	RNA001_Ecoli_TEX_replicate1
NC_000913.3	b2947	b2947	1	143	189	75.6614	RNA001_Ecoli_TEX_replicate1
NC_000913.3	b2951	b2951	1	62	83	74.6988	RNA001_Ecoli_TEX_replicate1
NC_000913.3	b2952	b2952,b2953	2	59	224	26.3393	RNA001_Ecoli_TEX_replicate1
NC_000913.3	b2952	b2952	1	121	224	54.0179	RNA001_Ecoli_TEX_replicate1
NC_000913.3	b2953	b2952,b2953	2	59	103	57.2816	RNA001_Ecoli_TEX_replicate1
NC_000913.3	b2955	b2955	1	182	206	88.3495	RNA001_Ecoli_TEX_replicate1
NC_000913.3	b2956	b2956	1	79	91	86.8132	RNA001_Ecoli_TEX_replicate1
NC_000913.3	b2957	b2957	1	438	458	95.6332	RNA001_Ecoli_TEX_replicate1
NC_000913.3	b2958	b2958	1	124	150	82.6667	RNA001_Ecoli_TEX_replicate1
NC_000913.3	b2959	b2959,b2960	2	74	189	39.1534	RNA001_Ecoli_TEX_replicate1
NC_000913.3	b2959	b2959	1	98	189	51.8519	RNA001_Ecoli_TEX_replicate1
NC_000913.3	b2960	b2960	1	74	152	48.6842	RNA001_Ecoli_TEX_replicate1
NC_000913.3	b2960	b2959,b2960	2	74	152	48.6842	RNA001_Ecoli_TEX_replicate1
NC_000913.3	b2961	b2961	1	176	216	81.4815	RNA001_Ecoli_TEX_replicate1
NC_000913.3	b2962	b2962	1	52	92	56.5217	RNA001_Ecoli_TEX_replicate1
NC_000913.3	b2963	b2963	1	193	195	98.9744	RNA001_Ecoli_TEX_replicate1
NC_000913.3	b2964	b2964	1	185	188	98.4043	RNA001_Ecoli_TEX_replicate1
NC_000913.3	b2965	b2965	1	98	100	98	RNA001_Ecoli_TEX_replicate1
NC_000913.3	b2966	b2966	1	119	119	100	RNA001_Ecoli_TEX_replicate1
NC_000913.3	b2972	b2972	1	182	211	86.2559	RNA001_Ecoli_TEX_replicate1
NC_000913.3	b2975	b2975	1	53	53	100	RNA001_Ecoli_TEX_replicate1
NC_000913.3	b2988	b2988	1	323	326	99.0798	RNA001_Ecoli_TEX_replicate1
NC_000913.3	b2990	b2990	1	60	80	75	RNA001_Ecoli_TEX_replicate1
NC_000913.3	b2994	b2994	1	148	174	85.0575	RNA001_Ecoli_TEX_replicate1
NC_000913.3	b2995	b2995	1	75	115	65.2174	RNA001_Ecoli_TEX_replicate1
NC_000913.3	b2996	b2996,b2997	2	51	145	35.1724	RNA001_Ecoli_TEX_replicate1
NC_000913.3	b2996	b2996	1	60	145	41.3793	RNA001_Ecoli_TEX_replicate1
NC_000913.3	b2997	b2997	1	331	402	82.3383	RNA001_Ecoli_TEX_replicate1
NC_000913.3	b2997	b2996,b2997	2	51	402	12.6866	RNA001_Ecoli_TEX_replicate1
NC_000913.3	b3001	b3001	1	58	80	72.5	RNA001_Ecoli_TEX_replicate1
NC_000913.3	b3002	b3002	1	366	388	94.3299	RNA001_Ecoli_TEX_replicate1
NC_000913.3	b3005	b3005	1	54	80	67.5	RNA001_Ecoli_TEX_replicate1
NC_000913.3	b3006	b3006	1	114	140	81.4286	RNA001_Ecoli_TEX_replicate1
NC_000913.3	b3008	b3008	1	52	57	91.2281	RNA001_Ecoli_TEX_replicate1
NC_000913.3	b3009	b3009	1	119	128	92.9688	RNA001_Ecoli_TEX_replicate1
NC_000913.3	b3010	b3010	1	68	72	94.4444	RNA001_Ecoli_TEX_replicate1
NC_000913.3	b3011	b3011	1	144	150	96	RNA001_Ecoli_TEX_replicate1
NC_000913.3	b3017	b3017	1	150	158	94.9367	RNA001_Ecoli_TEX_replicate1
NC_000913.3	b3019	b3019	1	437	441	99.093	RNA001_Ecoli_TEX_replicate1
NC_000913.3	b3020	b3020	1	60	62	96.7742	RNA001_Ecoli_TEX_replicate1
NC_000913.3	b3024	b3024	1	46	54	85.1852	RNA001_Ecoli_TEX_replicate1
NC_000913.3	b3026	b3026	1	51	55	92.7273	RNA001_Ecoli_TEX_replicate1
NC_000913.3	b3029	b3029	1	97	111	87.3874	RNA001_Ecoli_TEX_replicate1
NC_000913.3	b3030	b3030	1	239	279	85.6631	RNA001_Ecoli_TEX_replicate1
NC_000913.3	b3031	b3031	1	111	172	64.5349	RNA001_Ecoli_TEX_replicate1
NC_000913.3	b3032	b3032,b3033	2	43	203	21.1823	RNA001_Ecoli_TEX_replicate1
NC_000913.3	b3032	b3032	1	114	203	56.1576	RNA001_Ecoli_TEX_replicate1
NC_000913.3	b3033	b3032,b3033	2	43	128	33.5938	RNA001_Ecoli_TEX_replicate1
NC_000913.3	b3033	b3033	1	51	128	39.8438	RNA001_Ecoli_TEX_replicate1
NC_000913.3	b3034	b3034	1	75	101	74.2574	RNA001_Ecoli_TEX_replicate1
NC_000913.3	b3035	b3035	1	234	240	97.5	RNA001_Ecoli_TEX_replicate1
NC_000913.3	b3038	b3038	1	175	200	87.5	RNA001_Ecoli_TEX_replicate1
NC_000913.3	b3040	b3040	1	85	87	97.7011	RNA001_Ecoli_TEX_replicate1
NC_000913.3	b3041	b3041	1	642	651	98.6175	RNA001_Ecoli_TEX_replicate1
NC_000913.3	b3046	b3046,b3046	1	47	50	94	RNA001_Ecoli_TEX_replicate1
NC_000913.3	b3046	b3046,b3046	1	47	50	94	RNA001_Ecoli_TEX_replicate1
NC_000913.3	b3049	b3049	1	63	67	94.0299	RNA001_Ecoli_TEX_replicate1
NC_000913.3	b3052	b3052	1	250	338	73.9645	RNA001_Ecoli_TEX_replicate1
NC_000913.3	b3052	b3052,b4611	2	77	338	22.7811	RNA001_Ecoli_TEX_replicate1
NC_000913.3	b3053	b3053	1	145	175	82.8571	RNA001_Ecoli_TEX_replicate1
NC_000913.3	b3054	b3054	1	55	75	73.3333	RNA001_Ecoli_TEX_replicate1
NC_000913.3	b3056	b3056	1	277	307	90.228	RNA001_Ecoli_TEX_replicate1
NC_000913.3	b3057	b3057	1	410	444	92.3423	RNA001_Ecoli_TEX_replicate1
NC_000913.3	b3058	b3058	1	42	60	70	RNA001_Ecoli_TEX_replicate1
NC_000913.3	b3059	b3059	1	109	118	92.3729	RNA001_Ecoli_TEX_replicate1
NC_000913.3	b3064	b3064	1	194	223	86.9955	RNA001_Ecoli_TEX_replicate1
NC_000913.3	b3065	b3065,b3066	2	108	1035	10.4348	RNA001_Ecoli_TEX_replicate1
NC_000913.3	b3065	b3065	1	927	1035	89.5652	RNA001_Ecoli_TEX_replicate1
NC_000913.3	b3066	b3066	1	450	590	76.2712	RNA001_Ecoli_TEX_replicate1
NC_000913.3	b3066	b3065,b3066	2	108	590	18.3051	RNA001_Ecoli_TEX_replicate1
NC_000913.3	b3067	b3067	1	280	340	82.3529	RNA001_Ecoli_TEX_replicate1
NC_000913.3	b3068	b3068	1	93	122	76.2295	RNA001_Ecoli_TEX_replicate1
NC_000913.3	b3071	b3071	1	47	52	90.3846	RNA001_Ecoli_TEX_replicate1
NC_000913.3	b3072	b3072	1	59	64	92.1875	RNA001_Ecoli_TEX_replicate1
NC_000913.3	b3075	b3075	1	288	288	100	RNA001_Ecoli_TEX_replicate1
NC_000913.3	b3084	b3084	1	211	214	98.5981	RNA001_Ecoli_TEX_replicate1
NC_000913.3	b3087	b3087	1	98	101	97.0297	RNA001_Ecoli_TEX_replicate1
NC_000913.3	b3088	b3088	1	71	71	100	RNA001_Ecoli_TEX_replicate1
NC_000913.3	b3089	b3089	1	337	349	96.5616	RNA001_Ecoli_TEX_replicate1
NC_000913.3	b3090	b3090	1	44	56	78.5714	RNA001_Ecoli_TEX_replicate1
NC_000913.3	b3091	b3091	1	64	69	92.7536	RNA001_Ecoli_TEX_replicate1
NC_000913.3	b3093	b3093	1	153	155	98.7097	RNA001_Ecoli_TEX_replicate1
NC_000913.3	b3094	b3094	1	144	147	97.9592	RNA001_Ecoli_TEX_replicate1
NC_000913.3	b3095	b3095,b3096	2	112	392	28.5714	RNA001_Ecoli_TEX_replicate1
NC_000913.3	b3095	b3095	1	276	392	70.4082	RNA001_Ecoli_TEX_replicate1
NC_000913.3	b3096	b3095,b3096	2	112	210	53.3333	RNA001_Ecoli_TEX_replicate1
NC_000913.3	b3096	b3096	1	92	210	43.8095	RNA001_Ecoli_TEX_replicate1
NC_000913.3	b3099	b3099,b3100	2	93	187	49.7326	RNA001_Ecoli_TEX_replicate1
NC_000913.3	b3099	b3099	1	46	187	24.5989	RNA001_Ecoli_TEX_replicate1
NC_000913.3	b3100	b3099,b3100	2	93	150	62	RNA001_Ecoli_TEX_replicate1
NC_000913.3	b3103	b3103	1	387	403	96.0298	RNA001_Ecoli_TEX_replicate1
NC_000913.3	b3105	b3105	1	436	442	98.6425	RNA001_Ecoli_TEX_replicate1
NC_000913.3	b3107	b3107	1	59	62	95.1613	RNA001_Ecoli_TEX_replicate1
NC_000913.3	b3110	b3110	1	43	48	89.5833	RNA001_Ecoli_TEX_replicate1
NC_000913.3	b3118	b3118	1	100	101	99.0099	RNA001_Ecoli_TEX_replicate1
NC_000913.3	b3123	b3123	1	2746	2756	99.6372	RNA001_Ecoli_TEX_replicate1
NC_000913.3	b3125	b3125	1	45	53	84.9057	RNA001_Ecoli_TEX_replicate1
NC_000913.3	b3129	b3129,b3130	2	44	99	44.4444	RNA001_Ecoli_TEX_replicate1
NC_000913.3	b3130	b3130,b3131	2	380	481	79.0021	RNA001_Ecoli_TEX_replicate1
NC_000913.3	b3130	b3129,b3130	2	44	481	9.14761	RNA001_Ecoli_TEX_replicate1
NC_000913.3	b3131	b3131	1	1537	1938	79.3086	RNA001_Ecoli_TEX_replicate1
NC_000913.3	b3131	b3130,b3131	2	380	1938	19.6078	RNA001_Ecoli_TEX_replicate1
NC_000913.3	b3144	b3144	1	44	49	89.7959	RNA001_Ecoli_TEX_replicate1
NC_000913.3	b3146	b3146	1	46	65	70.7692	RNA001_Ecoli_TEX_replicate1
NC_000913.3	b3147	b3147	1	68	92	73.913	RNA001_Ecoli_TEX_replicate1
NC_000913.3	b3149	b3149,b3150	2	55	204	26.9608	RNA001_Ecoli_TEX_replicate1
NC_000913.3	b3149	b3149	1	141	204	69.1176	RNA001_Ecoli_TEX_replicate1
NC_000913.3	b3150	b3149,b3150	2	55	190	28.9474	RNA001_Ecoli_TEX_replicate1
NC_000913.3	b3150	b3150	1	122	190	64.2105	RNA001_Ecoli_TEX_replicate1
NC_000913.3	b3151	b3151	1	332	349	95.1289	RNA001_Ecoli_TEX_replicate1
NC_000913.3	b3155	b3155,b3156,b3157	3	53	101	52.4752	RNA001_Ecoli_TEX_replicate1
NC_000913.3	b3156	b3156,b3157	2	250	629	39.7456	RNA001_Ecoli_TEX_replicate1
NC_000913.3	b3156	b3155,b3156,b3157	3	53	629	8.42607	RNA001_Ecoli_TEX_replicate1
NC_000913.3	b3156	b3156	1	284	629	45.151	RNA001_Ecoli_TEX_replicate1
NC_000913.3	b3157	b3156,b3157	2	250	602	41.5282	RNA001_Ecoli_TEX_replicate1
NC_000913.3	b3157	b3157	1	292	602	48.505	RNA001_Ecoli_TEX_replicate1
NC_000913.3	b3157	b3155,b3156,b3157	3	53	602	8.80399	RNA001_Ecoli_TEX_replicate1
NC_000913.3	b3158	b3158,b3159	2	59	288	20.4861	RNA001_Ecoli_TEX_replicate1
NC_000913.3	b3158	b3158	1	221	288	76.7361	RNA001_Ecoli_TEX_replicate1
NC_000913.3	b3159	b3159,b3160	2	63	795	7.92453	RNA001_Ecoli_TEX_replicate1
NC_000913.3	b3159	b3159	1	670	795	84.2767	RNA001_Ecoli_TEX_replicate1
NC_000913.3	b3159	b3158,b3159	2	59	795	7.42138	RNA001_Ecoli_TEX_replicate1
NC_000913.3	b3160	b3159,b3160	2	63	112	56.25	RNA001_Ecoli_TEX_replicate1
NC_000913.3	b3161	b3161	1	115	123	93.4959	RNA001_Ecoli_TEX_replicate1
NC_000913.3	b3162	b3162,b3163	2	794	1527	51.9974	RNA001_Ecoli_TEX_replicate1
NC_000913.3	b3162	b3162	1	727	1527	47.6097	RNA001_Ecoli_TEX_replicate1
NC_000913.3	b3163	b3163,b3164	2	84	5107	1.6448	RNA001_Ecoli_TEX_replicate1
NC_000913.3	b3163	b3163	1	4224	5107	82.71	RNA001_Ecoli_TEX_replicate1
NC_000913.3	b3163	b3162,b3163	2	794	5107	15.5473	RNA001_Ecoli_TEX_replicate1
NC_000913.3	b3164	b3164	1	494	584	84.589	RNA001_Ecoli_TEX_replicate1
NC_000913.3	b3164	b3163,b3164	2	84	584	14.3836	RNA001_Ecoli_TEX_replicate1
NC_000913.3	b3165	b3165,b4449	2	183	1440	12.7083	RNA001_Ecoli_TEX_replicate1
NC_000913.3	b3165	b3165	1	1207	1440	83.8194	RNA001_Ecoli_TEX_replicate1
NC_000913.3	b3166	b3166	1	62	155	40	RNA001_Ecoli_TEX_replicate1
NC_000913.3	b3167	b3167	1	67	140	47.8571	RNA001_Ecoli_TEX_replicate1
NC_000913.3	b3168	b3168,b3169	2	49	1071	4.57516	RNA001_Ecoli_TEX_replicate1
NC_000913.3	b3168	b3168	1	992	1071	92.6237	RNA001_Ecoli_TEX_replicate1
NC_000913.3	b3169	b3169,b3170	2	55	310	17.7419	RNA001_Ecoli_TEX_replicate1
NC_000913.3	b3169	b3169	1	203	310	65.4839	RNA001_Ecoli_TEX_replicate1
NC_000913.3	b3169	b3168,b3169	2	49	310	15.8065	RNA001_Ecoli_TEX_replicate1
NC_000913.3	b3170	b3170	1	132	190	69.4737	RNA001_Ecoli_TEX_replicate1
NC_000913.3	b3170	b3169,b3170	2	55	190	28.9474	RNA001_Ecoli_TEX_replicate1
NC_000913.3	b3172	b3172	1	147	150	98	RNA001_Ecoli_TEX_replicate1
NC_000913.3	b3173	b3173	1	55	69	79.7101	RNA001_Ecoli_TEX_replicate1
NC_000913.3	b3175	b3175	1	7659	7682	99.7006	RNA001_Ecoli_TEX_replicate1
NC_000913.3	b3176	b3176	1	346	376	92.0213	RNA001_Ecoli_TEX_replicate1
NC_000913.3	b3178	b3178,b3179	2	54	1297	4.16345	RNA001_Ecoli_TEX_replicate1
NC_000913.3	b3178	b3178	1	1229	1297	94.7571	RNA001_Ecoli_TEX_replicate1
NC_000913.3	b3179	b3179	1	144	237	60.7595	RNA001_Ecoli_TEX_replicate1
NC_000913.3	b3179	b3178,b3179	2	54	237	22.7848	RNA001_Ecoli_TEX_replicate1
NC_000913.3	b3180	b3180	1	380	440	86.3636	RNA001_Ecoli_TEX_replicate1
NC_000913.3	b3181	b3181	1	178	200	89	RNA001_Ecoli_TEX_replicate1
NC_000913.3	b3182	b3182	1	47	49	95.9184	RNA001_Ecoli_TEX_replicate1
NC_000913.3	b3183	b3183	1	758	802	94.5137	RNA001_Ecoli_TEX_replicate1
NC_000913.3	b3184	b3184	1	1023	1090	93.8532	RNA001_Ecoli_TEX_replicate1
NC_000913.3	b3185	b3185,b3186	2	589	883	66.7044	RNA001_Ecoli_TEX_replicate1
NC_000913.3	b3185	b3185	1	267	883	30.2378	RNA001_Ecoli_TEX_replicate1
NC_000913.3	b3186	b3186	1	1026	1638	62.6374	RNA001_Ecoli_TEX_replicate1
NC_000913.3	b3186	b3185,b3186	2	589	1638	35.9585	RNA001_Ecoli_TEX_replicate1
NC_000913.3	b3187	b3187	1	205	211	97.1564	RNA001_Ecoli_TEX_replicate1
NC_000913.3	b3189	b3189,b3190	2	129	630	20.4762	RNA001_Ecoli_TEX_replicate1
NC_000913.3	b3189	b3189	1	467	630	74.127	RNA001_Ecoli_TEX_replicate1
NC_000913.3	b3190	b3189,b3190	2	129	314	41.0828	RNA001_Ecoli_TEX_replicate1
NC_000913.3	b3190	b3190	1	166	314	52.8662	RNA001_Ecoli_TEX_replicate1
NC_000913.3	b3191	b3191,b3192	2	90	144	62.5	RNA001_Ecoli_TEX_replicate1
NC_000913.3	b3192	b3191,b3192	2	90	444	20.2703	RNA001_Ecoli_TEX_replicate1
NC_000913.3	b3192	b3192	1	309	444	69.5946	RNA001_Ecoli_TEX_replicate1
NC_000913.3	b3193	b3193	1	92	155	59.3548	RNA001_Ecoli_TEX_replicate1
NC_000913.3	b3194	b3194	1	205	276	74.2754	RNA001_Ecoli_TEX_replicate1
NC_000913.3	b3195	b3195	1	322	364	88.4615	RNA001_Ecoli_TEX_replicate1
NC_000913.3	b3196	b3196,b3197	2	69	273	25.2747	RNA001_Ecoli_TEX_replicate1
NC_000913.3	b3196	b3196	1	200	273	73.2601	RNA001_Ecoli_TEX_replicate1
NC_000913.3	b3197	b3197,b3198	2	50	431	11.6009	RNA001_Ecoli_TEX_replicate1
NC_000913.3	b3197	b3196,b3197	2	69	431	16.0093	RNA001_Ecoli_TEX_replicate1
NC_000913.3	b3197	b3197	1	299	431	69.3735	RNA001_Ecoli_TEX_replicate1
NC_000913.3	b3198	b3198	1	67	173	38.7283	RNA001_Ecoli_TEX_replicate1
NC_000913.3	b3198	b3197,b3198	2	50	173	28.9017	RNA001_Ecoli_TEX_replicate1
NC_000913.3	b3201	b3201	1	68	132	51.5152	RNA001_Ecoli_TEX_replicate1
NC_000913.3	b3202	b3202	1	137	193	70.9845	RNA001_Ecoli_TEX_replicate1
NC_000913.3	b3204	b3204	1	49	71	69.0141	RNA001_Ecoli_TEX_replicate1
NC_000913.3	b3205	b3205	1	59	78	75.641	RNA001_Ecoli_TEX_replicate1
NC_000913.3	b3207	b3207,b3208	2	111	521	21.3052	RNA001_Ecoli_TEX_replicate1
NC_000913.3	b3207	b3207	1	409	521	78.5029	RNA001_Ecoli_TEX_replicate1
NC_000913.3	b3208	b3208	1	63	202	31.1881	RNA001_Ecoli_TEX_replicate1
NC_000913.3	b3208	b3207,b3208	2	111	202	54.9505	RNA001_Ecoli_TEX_replicate1
NC_000913.3	b3209	b3209	1	76	121	62.8099	RNA001_Ecoli_TEX_replicate1
NC_000913.3	b3210	b3210	1	447	482	92.7386	RNA001_Ecoli_TEX_replicate1
NC_000913.3	b3211	b3211	1	60	63	95.2381	RNA001_Ecoli_TEX_replicate1
NC_000913.3	b3212	b3212	1	191	203	94.0887	RNA001_Ecoli_TEX_replicate1
NC_000913.3	b3213	b3213	1	104	116	89.6552	RNA001_Ecoli_TEX_replicate1
NC_000913.3	b3214	b3214	1	43	43	100	RNA001_Ecoli_TEX_replicate1
NC_000913.3	b3216	b3216	1	59	60	98.3333	RNA001_Ecoli_TEX_replicate1
NC_000913.3	b3219	b3219	1	45	51	88.2353	RNA001_Ecoli_TEX_replicate1
NC_000913.3	b3226	b3226	1	433	435	99.5402	RNA001_Ecoli_TEX_replicate1
NC_000913.3	b3228	b3228,b3229	2	96	338	28.4024	RNA001_Ecoli_TEX_replicate1
NC_000913.3	b3228	b3228	1	239	338	70.7101	RNA001_Ecoli_TEX_replicate1
NC_000913.3	b3229	b3228,b3229	2	96	284	33.8028	RNA001_Ecoli_TEX_replicate1
NC_000913.3	b3229	b3229	1	188	284	66.1972	RNA001_Ecoli_TEX_replicate1
NC_000913.3	b3230	b3230,b3231	2	433	1126	38.4547	RNA001_Ecoli_TEX_replicate1
NC_000913.3	b3230	b3230	1	692	1126	61.4565	RNA001_Ecoli_TEX_replicate1
NC_000913.3	b3231	b3230,b3231	2	433	980	44.1837	RNA001_Ecoli_TEX_replicate1
NC_000913.3	b3231	b3231	1	546	980	55.7143	RNA001_Ecoli_TEX_replicate1
NC_000913.3	b3232	b3232	1	231	233	99.1416	RNA001_Ecoli_TEX_replicate1
NC_000913.3	b3233	b3233	1	112	116	96.5517	RNA001_Ecoli_TEX_replicate1
NC_000913.3	b3234	b3234	1	100	110	90.9091	RNA001_Ecoli_TEX_replicate1
NC_000913.3	b3235	b3235	1	220	228	96.4912	RNA001_Ecoli_TEX_replicate1
NC_000913.3	b3236	b3236	1	93	94	98.9362	RNA001_Ecoli_TEX_replicate1
NC_000913.3	b3237	b3237	1	191	191	100	RNA001_Ecoli_TEX_replicate1
NC_000913.3	b3238	b3238	1	81	81	100	RNA001_Ecoli_TEX_replicate1
NC_000913.3	b3240	b3240	1	48	63	76.1905	RNA001_Ecoli_TEX_replicate1
NC_000913.3	b3243	b3243	1	56	65	86.1538	RNA001_Ecoli_TEX_replicate1
NC_000913.3	b3244	b3244	1	263	279	94.2652	RNA001_Ecoli_TEX_replicate1
NC_000913.3	b3247	b3247,b3248,b3249	3	66	1237	5.33549	RNA001_Ecoli_TEX_replicate1
NC_000913.3	b3247	b3247,b3248	2	124	1237	10.0243	RNA001_Ecoli_TEX_replicate1
NC_000913.3	b3247	b3247	1	985	1237	79.6281	RNA001_Ecoli_TEX_replicate1
NC_000913.3	b3247	b3247,b4472	2	57	1237	4.60792	RNA001_Ecoli_TEX_replicate1
NC_000913.3	b3248	b3248,b3249	2	188	670	28.0597	RNA001_Ecoli_TEX_replicate1
NC_000913.3	b3248	b3247,b3248,b3249	3	66	670	9.85075	RNA001_Ecoli_TEX_replicate1
NC_000913.3	b3248	b3247,b3248	2	124	670	18.5075	RNA001_Ecoli_TEX_replicate1
NC_000913.3	b3248	b3248	1	284	670	42.3881	RNA001_Ecoli_TEX_replicate1
NC_000913.3	b3249	b3249,b3250	2	46	448	10.2679	RNA001_Ecoli_TEX_replicate1
NC_000913.3	b3249	b3248,b3249	2	188	448	41.9643	RNA001_Ecoli_TEX_replicate1
NC_000913.3	b3249	b3249	1	131	448	29.2411	RNA001_Ecoli_TEX_replicate1
NC_000913.3	b3249	b3247,b3248,b3249	3	66	448	14.7321	RNA001_Ecoli_TEX_replicate1
NC_000913.3	b3250	b3250,b3251	2	123	504	24.4048	RNA001_Ecoli_TEX_replicate1
NC_000913.3	b3250	b3250	1	318	504	63.0952	RNA001_Ecoli_TEX_replicate1
NC_000913.3	b3250	b3249,b3250	2	46	504	9.12698	RNA001_Ecoli_TEX_replicate1
NC_000913.3	b3251	b3251	1	922	1066	86.4916	RNA001_Ecoli_TEX_replicate1
NC_000913.3	b3251	b3250,b3251	2	123	1066	11.5385	RNA001_Ecoli_TEX_replicate1
NC_000913.3	b3252	b3252	1	465	475	97.8947	RNA001_Ecoli_TEX_replicate1
NC_000913.3	b3253	b3253	1	204	204	100	RNA001_Ecoli_TEX_replicate1
NC_000913.3	b3255	b3255,b3256	2	87	214	40.6542	RNA001_Ecoli_TEX_replicate1
NC_000913.3	b3255	b3255	1	127	214	59.3458	RNA001_Ecoli_TEX_replicate1
NC_000913.3	b3256	b3256	1	582	669	86.9955	RNA001_Ecoli_TEX_replicate1
NC_000913.3	b3256	b3255,b3256	2	87	669	13.0045	RNA001_Ecoli_TEX_replicate1
NC_000913.3	b3258	b3258,b3259	2	49	240	20.4167	RNA001_Ecoli_TEX_replicate1
NC_000913.3	b3258	b3258	1	182	240	75.8333	RNA001_Ecoli_TEX_replicate1
NC_000913.3	b3259	b3259	1	124	173	71.6763	RNA001_Ecoli_TEX_replicate1
NC_000913.3	b3259	b3258,b3259	2	49	173	28.3237	RNA001_Ecoli_TEX_replicate1
NC_000913.3	b3260	b3260,b3261	2	63	583	10.8062	RNA001_Ecoli_TEX_replicate1
NC_000913.3	b3260	b3260	1	520	583	89.1938	RNA001_Ecoli_TEX_replicate1
NC_000913.3	b3261	b3260,b3261	2	63	118	53.3898	RNA001_Ecoli_TEX_replicate1
NC_000913.3	b3261	b3261	1	54	118	45.7627	RNA001_Ecoli_TEX_replicate1
NC_000913.3	b3266	b3266	1	202	202	100	RNA001_Ecoli_TEX_replicate1
NC_000913.3	b3279	b3279	1	48	107	44.8598	RNA001_Ecoli_TEX_replicate1
NC_000913.3	b3281	b3281	1	83	133	62.406	RNA001_Ecoli_TEX_replicate1
[truncated: 7,061 more rows]
