# Supplementary material
Source: HighWire-hosted journal article supplement (doi:10.1101/rna.078937.121)
Supplement: Supplementary_Table_Legends.docx [file Supplementary_Table_Legends.docx]

Supplementary Tables

Supplementary Table 1. Sequencing information and mapping summary statistics.

Supplementary Table 2. List of figures with link to data and code to reproduce the results.

Supplementary Table 3. Salmon results in transcripts per million (TPM) for all of the ONT and used publicly available datasets.

Supplementary Table 4. 5´end table for all ONT datasets and 5´end types.

Supplementary Table 5. 3´end table for all ONT datasets and 3´end types.

Supplementary Table 6. Transcription units table for three datasets (RNA: RNA001_Ecoli_TEX_replicate1, DCS: DCS109_Ecoli_NOTEX_replicate2, PCB: PCB109_PCR12_Ecoli_NOTEX_replicate4).
